# Supplementary material for: Kinetic resolution of heterobiaryl N-oxides by asymmetric C–H olefination: an expeditious access to (R)-QUINAP
Source: Royal Society of Chemistry journal article supplement (doi:10.1039/d3qo01083j), 2023-01-01
Supplement: d3qo01083j1.pdf [file d3qo01083j1.pdf]

## Supporting Information for

# Kinetic Resolution of *N*-Heterobiaryl *N*-oxides by Asymmetric C-H Olefination: An Expedient Access to (*R*)-QUINAP

Qi-Ying Zhang\*<sup>‡</sup>, Hai-Yang Wang<sup>‡</sup>, Songlin Wang, Jing Ma and Hai-Ming Guo\*

State Key Laboratory of Antiviral Drugs, Pingyuan Laboratory, Key Laboratory of Green Chemical Media and Reactions, Ministry of Education, Collaborative Innovation Center of Henan Province for Green Manufacturing of Fine Chemicals, School of Chemistry and Chemical Engineering, Henan Normal University, Xinxiang, Henan 453007, China.

## Table of Contents

|                                                                                    |      |
|------------------------------------------------------------------------------------|------|
| 1. General information.....                                                        | S2   |
| 2. Experimental Section .....                                                      | S2   |
| 2.1 Synthesis methods for starting materials <sup>1</sup> .....                    | S2   |
| 2.2 Optimization of reaction conditions.....                                       | S3   |
| 2.3 General procedure for kinetic resolution of heterobiaryl <i>N</i> -oxides..... | S5   |
| 2.4 Control experiments.....                                                       | S6   |
| 2.5 Kinetic isotope effects (KIE) studies .....                                    | S6   |
| 2.5.1 Synthesis of substrates <i>rac</i> -1a-[D <sub>7</sub> ] <sup>2</sup> .....  | S6   |
| 2.5.2 Kinetic isotope effect experiment .....                                      | S7   |
| 2.6 Gram-scale reaction .....                                                      | S8   |
| 2.7 Derivatization of recovered ( <i>S</i> )-1a and product 3aa <sup>3</sup> ..... | S11  |
| 3. The analytical and spectral characterization data.....                          | S13  |
| 4. Copies of NMR spectra.....                                                      | S37  |
| 5. Copies of HPLC spectra for racemic and chiral products.....                     | S84  |
| 6. References.....                                                                 | S134 |

## 1. General information

All reactions were carried out in oven-dried tube, and monitored by thin layer chromatography (TLC). All reagents were reagent grade quality and purchased from commercial sources unless otherwise indicated.  $^1\text{H}$  NMR,  $^{13}\text{C}$  NMR,  $^{19}\text{F}$  NMR and  $^{31}\text{P}$  NMR spectra were recorded on Bruker Avance III HD 600 or Avance 400 MHz spectrometer. Chemical shifts are recorded in ppm relative to tetramethylsilane with the solvent resonance as the internal standard. Data are represented as follows: chemical shift, multiplicity (s = singlet, d = doublet, t = triplet, q = quartet, dd = doublet of doublets, m = multiplet), coupling constants ( $J$ ) are in Hertz (Hz), and integration. Enantiomer excesses were determined by chiral HPLC analysis on Chiralcel ODH/IA/AD/IF/ID/AY-RH in comparison with the authentic racemates. Chiral HPLC analysis was recorded on Thermo Scientific Dionex Ultimate 3000 and Agilent Technologies 1260 Infinity. Optical rotations were recorded on Autopol Automatic Polarimeter, and were reported as follows:  $[\alpha]_{\text{D}}^{\text{T}}$  (c: g/100 mL, in  $\text{CH}_2\text{Cl}_2$ ). High resolution mass spectra (HRMS) were recorded on an ABI/Sciex QStar Mass Spectrometer (ESI). Melting point (m.p.) data were obtained on X-5 micro melting point apparatus. For column chromatography, silica gel (200-300 mesh) was used as the stationary phase.

## 2. Experimental Section

### 2.1 Synthesis methods for starting materials<sup>1</sup>

Synthesis of substrates *rac-1a-n*

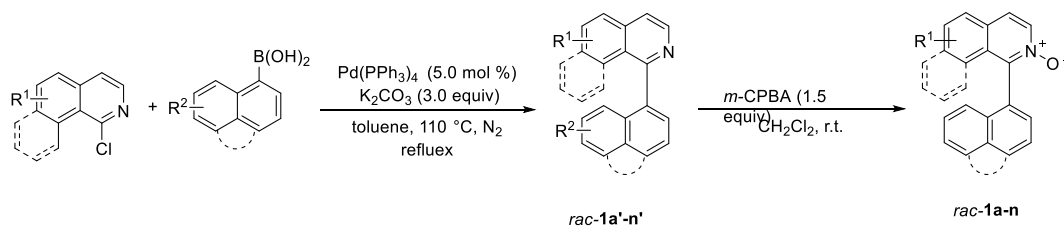

To a 100 mL round bottom flask, Aryl-Cl, Aryl boric acid (6.0 mmol),  $\text{Pd}(\text{PPh}_3)_4$  (288.9 mg, 0.25 mmol),  $\text{K}_2\text{CO}_3$  (2.0732 g, 15.0 mmol) and toluene (40 mL) were added successively. The resulting solution was degassed with  $\text{N}_2$  for 5 min. The reaction mixture was stirred at  $110\text{ }^\circ\text{C}$  until the starting materials were consumed as indicated by TLC analysis. After completion, the resulting reaction mixture was slowly brought to room temperature, then quenched with  $\text{H}_2\text{O}$  (20 mL) and extracted with  $\text{CH}_2\text{Cl}_2$  (30 mL $\times$ 3). The combined organic layers were washed with brine (100

mL×3), dried over anhydrous Na<sub>2</sub>SO<sub>4</sub>, filtered, and evaporated under reduced pressure. The residue was purified by flash column chromatography with petroleum ether/ethyl acetate (20/1 to 10/1, v/v) as the eluant to afford the coupling products *rac*-**1a'-n'**.

To a solution of the *rac*-**1a'-n'** (3.0 mmol) in CH<sub>2</sub>Cl<sub>2</sub> (25 mL) was added *m*-chloroperoxybenzoic acid (776.6 mg, 4.5 mmol). The reaction mixture was stirred at r.t. until the coupling products were consumed as indicated by TLC analysis. Then the reaction mixture was quenched with saturated Na<sub>2</sub>CO<sub>3</sub> aqueous solution and extracted with CH<sub>2</sub>Cl<sub>2</sub> (20 mL×3). The combined organic layers were washed with brine, dried over anhydrous Na<sub>2</sub>SO<sub>4</sub> and filtrated. The solvent was removed under reduced pressure and the residue was purified by silica gel column chromatography (ethyl acetate/methanol = 10/1, v/v) to afford *rac*-**1a-n**.

## 2.2 Optimization of reaction conditions

**Table S1** Screening of different solvents<sup>a</sup>

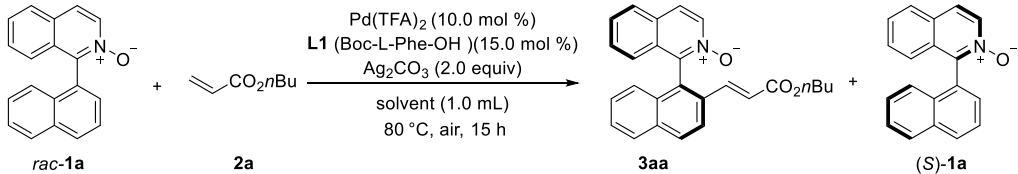

| entry | solvent                       | ee ( <b>3aa</b> ) (%) <sup>b</sup> | ee (( <i>S</i> )- <b>1a</b> ) (%) <sup>b</sup> | conv (%) <sup>c</sup> | <i>s</i> <sup>d</sup> |
|-------|-------------------------------|------------------------------------|------------------------------------------------|-----------------------|-----------------------|
| 1     | DCE                           | 46                                 | 41                                             | 47                    | 4.0                   |
| 2     | CH <sub>3</sub> CN            | 91                                 | 10                                             | 10                    | 23.4                  |
| 3     | THF                           | 60                                 | 35                                             | 37                    | 5.6                   |
| 4     | DCE/ CH <sub>3</sub> CN (1/1) | 88                                 | 25                                             | 22                    | 20.0                  |
| 5     | THF/ CH <sub>3</sub> CN (1/1) | 90                                 | 21                                             | 19                    | 23.3                  |
| 6     | DCE/ CH <sub>3</sub> CN (9/1) | 74                                 | 37                                             | 33                    | 9.6                   |
| 7     | DCE/ CH <sub>3</sub> CN (8/2) | 83                                 | 33                                             | 28                    | 14.8                  |
| 8     | DCE/ CH <sub>3</sub> CN (7/3) | 85                                 | 27                                             | 24                    | 16.0                  |
| 9     | DCE/ CH <sub>3</sub> CN (6/4) | 92                                 | 38                                             | 29                    | 34.8                  |

<sup>a</sup>reaction conditions: *rac*-**1a** (0.1 mmol), **2a** (0.3 mmol), Pd(TFA)<sub>2</sub> (10.0 mol %), **L1** (Boc-L-Phe-OH)(15.0 mol %), Ag<sub>2</sub>CO<sub>3</sub> (2.0 equiv), solvent (1.0 mL), under air at 80 °C. <sup>b</sup>Determined by chiral HPLC analysis. <sup>c</sup>Conversion (C) = ee<sub>1a</sub>/(ee<sub>1a</sub> + ee<sub>3aa</sub>). <sup>d</sup>Selectivity factor, *s* = ln[(1-C)(1-ee<sub>1a</sub>)]/ln[(1-C)(1 + ee<sub>1a</sub>)].

**Table S2** Screening of different quinone additives<sup>a</sup>

Reaction scheme for Table S2: *rac*-**1a** + **2a** reacts with Pd(TFA)<sub>2</sub> (10.0 mol %), **L8** (Ac-L-Ala-OH) (15.0 mol %), Ag<sub>2</sub>CO<sub>3</sub> (2.0 equiv) in DCE/CH<sub>3</sub>CN (3/2, 1.0 mL) at 80 °C, air, 5 h to yield **3aa** and (*S*)-**1a**.

Seven quinone additives (Q1-Q7) are shown below the reaction scheme:

Q1: 1,4-benzoquinone  
 Q2: 2,3,6,7-tetrahydro-1,4-benzoquinone  
 Q3: 2,3,5,6-tetrachloro-1,4-benzoquinone  
 Q4: 2-methyl-1,4-benzoquinone  
 Q5: 2,5-dimethyl-1,4-benzoquinone  
 Q6: 2,3,5,6-tetramethyl-1,4-benzoquinone  
 Q7: 2,3,5,6-tetramethoxy-1,4-benzoquinone

| entry | quinone (20.0 mol %) | ee ( <b>3aa</b> ) (%) <sup>b</sup> | ee (( <i>S</i> )- <b>1a</b> ) (%) <sup>b</sup> | conv (%) <sup>c</sup> | <i>s</i> <sup>d</sup> |
|-------|----------------------|------------------------------------|------------------------------------------------|-----------------------|-----------------------|
| 1     | Q1                   | 93                                 | 89                                             | 49                    | 82.6                  |
| 2     | Q2                   | 96                                 | 43                                             | 31                    | 74.9                  |
| 3     | Q3                   | 90                                 | 14                                             | 13                    | 21.8                  |
| 4     | Q4                   | 95                                 | 60                                             | 39                    | 71.9                  |
| 5     | Q5                   | 94                                 | 57                                             | 38                    | 57.5                  |
| 6     | Q6                   | 93                                 | 69                                             | 43                    | 57.0                  |
| 7     | Q7                   | 93                                 | 72                                             | 44                    | 59.5                  |

<sup>a</sup> reaction conditions: *rac*-**1a** (0.1 mmol), **2a** (0.3 mmol), Pd(TFA)<sub>2</sub> (10.0 mol %), **L8** (Ac-L-Ala-OH) (15.0 mol %), Ag<sub>2</sub>CO<sub>3</sub> (2.0 equiv), quinone (20.0 mol%), DCE/CH<sub>3</sub>CN (3/2, 1.0 mL), under air at 80 °C, 5 h. <sup>b</sup>Determined by chiral HPLC analysis. <sup>c</sup>Conversion (C) = ee<sub>1a</sub>/(ee<sub>1a</sub> + ee<sub>3aa</sub>). <sup>d</sup>Selectivity factor,  $s = \ln[(1 - C)(1 - ee_{1a})]/\ln[(1 - C)(1 + ee_{1a})]$ .

**Table S3** Screening of different protic additives<sup>a</sup>

Reaction scheme for Table S3: *rac*-**1a** + **2a** reacts with Pd(TFA)<sub>2</sub> (10.0 mol %), **L8** (Ac-L-Ala-OH) (15.0 mol %), Ag<sub>2</sub>CO<sub>3</sub> (2.0 equiv), BQ (20.0 mol %), additive (6.0 equiv) in DCE/CH<sub>3</sub>CN (3/2, 1.0 mL) at 80 °C, air, 5 h to yield **3aa** and (*S*)-**1a**.

| entry | additives     | ee ( <b>3aa</b> ) (%) <sup>b</sup> | ee (( <i>S</i> )- <b>1a</b> ) (%) <sup>b</sup> | conv (%) <sup>c</sup> | <i>s</i> <sup>d</sup> |
|-------|---------------|------------------------------------|------------------------------------------------|-----------------------|-----------------------|
| 1     | TFE           | 93                                 | 92                                             | 50                    | 90.7                  |
| 2     | MeOH          | 90                                 | 92                                             | 51                    | 62.3                  |
| 3     | EtOH          | 90                                 | 91                                             | 50                    | 60.2                  |
| 4     | <i>i</i> PrOH | 92                                 | 91                                             | 50                    | 76.3                  |
| 5     | HFIP          | 96                                 | 79                                             | 45                    | 118.6                 |

<sup>a</sup> reaction conditions: *rac*-**1a** (0.1 mmol), **2a** (0.3 mmol), Pd(TFA)<sub>2</sub> (10 mol %), **L8** (Ac-L-Ala-OH)

(15.0 mol %), Ag<sub>2</sub>CO<sub>3</sub> (2.0 equiv), BQ (20.0 mol%), additive (6.0 equiv), DCE/CH<sub>3</sub>CN (3/2, 1.0 mL), under air at 80 °C, 5 h. <sup>b</sup> Determined by chiral HPLC analysis. <sup>c</sup> Conversion (C) = ee<sub>1a</sub>/(ee<sub>1a</sub> + ee<sub>3aa</sub>). <sup>d</sup> Selectivity factor,  $s = \ln[(1 - C)(1 - ee_{1a})]/\ln[(1 - C)(1 + ee_{1a})]$ .

**Table S4** Screening of TFE dosages<sup>a</sup>

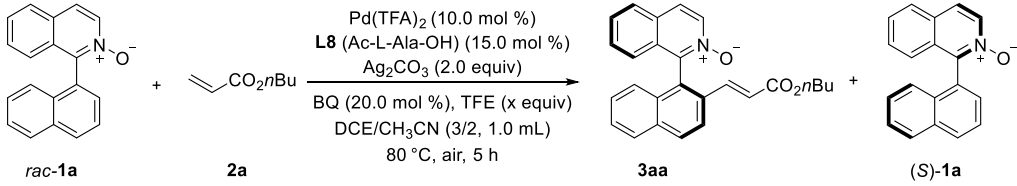

| entry | TFE (x equiv) | ee ( <b>3aa</b> ) (%) <sup>b</sup> | ee (( <i>S</i> )- <b>1a</b> ) (%) <sup>b</sup> | conv (%) <sup>c</sup> | <i>s</i> <sup>d</sup> |
|-------|---------------|------------------------------------|------------------------------------------------|-----------------------|-----------------------|
| 1     | 2.0           | 91                                 | 94                                             | 51                    | 75.3                  |
| 2     | 3.0           | 91                                 | 93                                             | 51                    | 72.2                  |
| 3     | 4.0           | 92                                 | 94                                             | 51                    | 85.2                  |
| 4     | 5.0           | 93                                 | 95                                             | 51                    | 102.7                 |
| 5     | 6.0           | 93                                 | 92                                             | 50                    | 90.7                  |

<sup>a</sup> reaction conditions: (*rac*)-**1a** (0.1 mmol), **2a** (0.3 mmol), Pd(TFA)<sub>2</sub> (10 mol%), **L8** (Ac-L-Ala-OH) (15.0 mol%), Ag<sub>2</sub>CO<sub>3</sub> (2.0 equiv), BQ (20.0 mol%), TFE (5.0 equiv), DCE/CH<sub>3</sub>CN (3/2, 1.0 mL), under air at 80 °C, 5 h. <sup>b</sup> Determined by chiral HPLC analysis. <sup>c</sup> Conversion (C) = ee<sub>1a</sub>/(ee<sub>1a</sub> + ee<sub>3aa</sub>). <sup>d</sup> Selectivity factor,  $s = \ln[(1 - C)(1 - ee_{1a})]/\ln[(1 - C)(1 + ee_{1a})]$ .

### 2.3 General procedure for kinetic resolution of heterobiaryl *N*-oxides

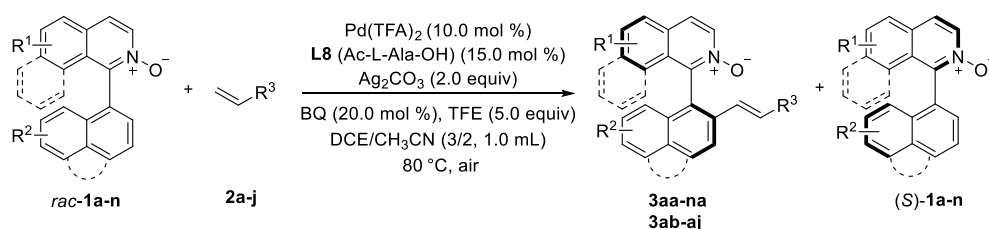

In a test tube, *rac*-**1a-n** (0.1 mmol), BQ (2.2 mg, 0.02 mmol), **L8** (Ac-L-Ala-OH) (2.0 mg, 0.015 mmol), Pd(TFA)<sub>2</sub> (3.3 mg, 0.01 mmol), and Ag<sub>2</sub>CO<sub>3</sub> (55.2 mg, 0.2 mmol) were added. Then, DCE/CH<sub>3</sub>CN (3/2, v/v, 1.0 mL), **2a-j** (0.3 mmol, 3.0 equiv), and TFE (36 μL, 0.5 mmol) were added successively. The reaction was stirred under air at 80 °C for 5 h. After the reaction was complete (monitoring by TLC), the reaction mixture was filtered through a pad of celite. Subsequently, the filtrate was concentrated under vacuum. The residue was purified by flash column chromatography on silica gel (eluent: petroleum ether/ethyl acetate = 1/10 to 1/20, v/v) to give the products **3aa-la/3ab-aj** and recovered (*S*)-**1a-n**.

## 2.4 Control experiments

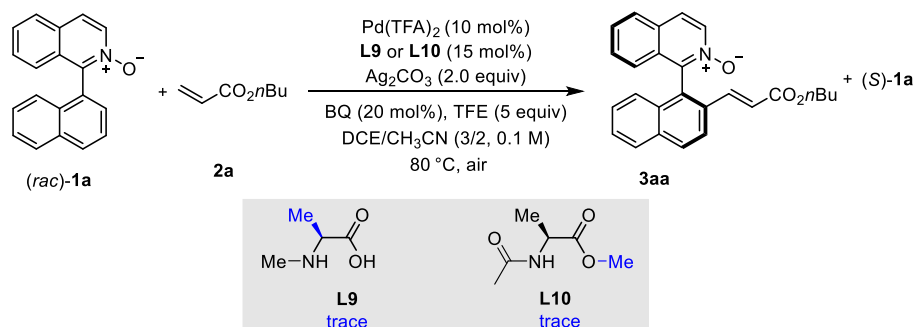

In a test tube, *rac*-**1a** (0.1 mmol), BQ (2.2 mg, 0.02 mmol), **L9** or **L10** (0.015 mmol), Pd(TFA)<sub>2</sub> (3.3 mg, 0.01 mmol), and Ag<sub>2</sub>CO<sub>3</sub> (55.2 mg, 0.2 mmol) were added. Then, DCE/CH<sub>3</sub>CN (3/2, v/v, 1.0 mL), **2a** (0.3 mmol, 3.0 equiv), and TFE (36 μL, 0.5 mmol) were added successively. The reaction was stirred under air at 80 °C for 5 h. The reaction was monitored by TLC, and no desired product was observed.

## 2.5 Kinetic isotope effects (KIE) studies

### 2.5.1 Synthesis of substrates *rac*-**1a**-[D<sub>7</sub>]<sup>2</sup>

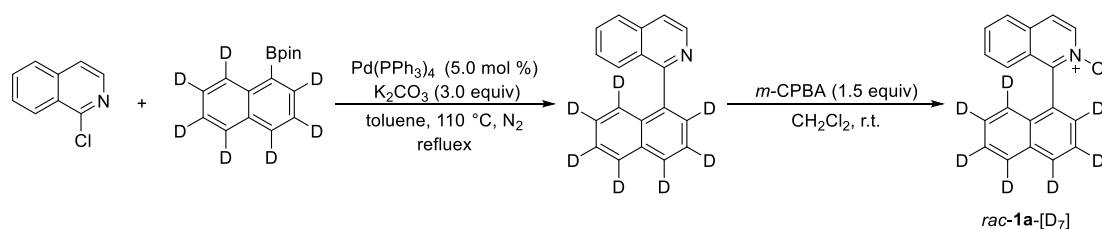

According to the method for the preparation of *rac*-**1a**, *rac*-**1a**-[D<sub>7</sub>] was synthesized.

### 1-(naphthalen-1-yl-d<sub>7</sub>)isoquinoline-*N*-oxide (*rac*-**1a**-[D<sub>7</sub>])

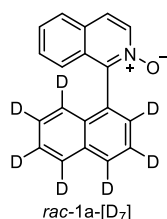

Foamy solid, R<sub>f</sub> = 0.30 (EtOAc/MeOH, 25/1, v/v). <sup>1</sup>H NMR (600 MHz, CDCl<sub>3</sub>) δ 8.36 (d, *J* = 7.2 Hz, 1H), 7.82 (d, *J* = 7.8 Hz, 1H), 7.75 (d, *J* = 7.2 Hz, 1H), 7.51 (d, *J* = 7.8 Hz, 1H), 7.36 (d, *J* = 7.8 Hz, 1H), 7.20 (d, *J* = 8.4 Hz, 1H). <sup>13</sup>C NMR (150 MHz, CDCl<sub>3</sub>) δ 145.4, 137.4, 133.6, 131.2, 130.3, 129.5 (t, *J* = 24.0 Hz), 129.1, 128.8, 128.8, 128.3, 128.0 (m), 126.8, 126.4 (t, *J* = 24.0 Hz), 125.8 (t, *J* = 24.0 Hz), 125.5, 124.8 (m), 123.7. HRMS (ESI): exact mass calcd for C<sub>19</sub>H<sub>7</sub>D<sub>7</sub>NO<sup>+</sup> (M+H)<sup>+</sup>

requires m/z 279.1509, found m/z 279.1511.

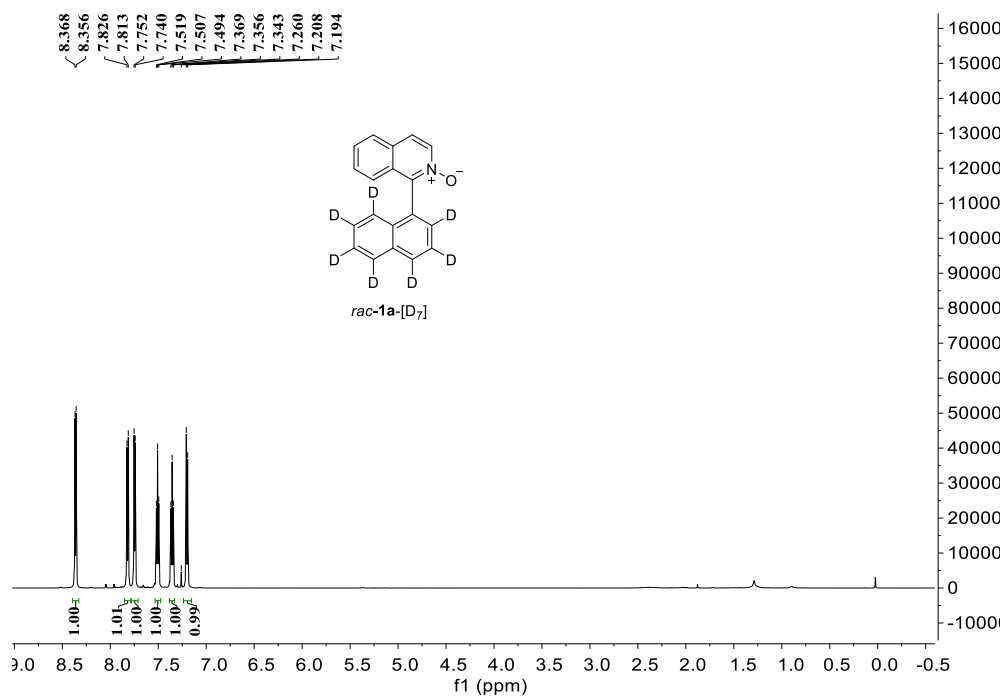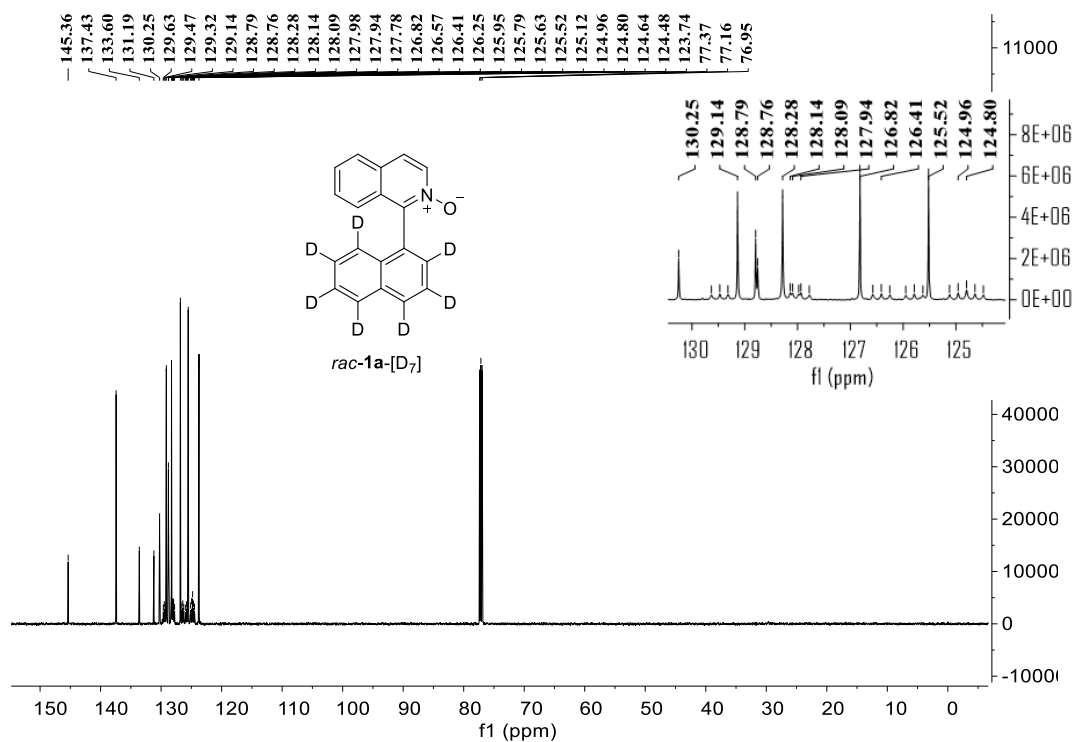

## 2.5.2 Kinetic isotope effect experiment

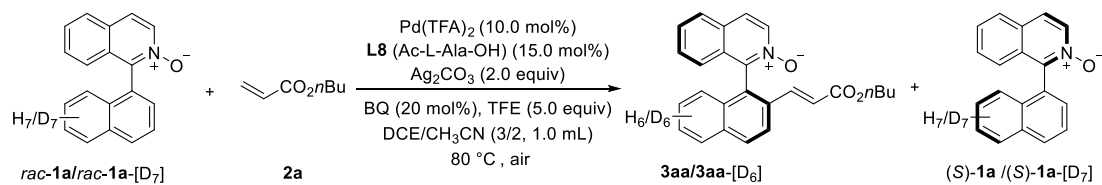

In six parallel tubes, *rac*-**1a** (27.1 mg, 0.1 mmol), BQ (2.2 mg, 0.02 mmol), **L8** (Ac-L-Ala-OH) (2.0 mg, 0.015 mmol), Pd(TFA)<sub>2</sub> (3.3 mg, 0.01 mmol), and Ag<sub>2</sub>CO<sub>3</sub> (55.2 mg, 0.2 mmol) were added. Then, DCE/CH<sub>3</sub>CN (6/4, v/v, 1 mL), **2a** (43 μL 0.3 mmol), and TFE (36 μL, 0.5 mmol) were added successively. The reaction was stirred under air at 80 °C. These reactions were stopped at the time of 5 min, 10 min, 15 min, 20 min, 25 min and 30 min successively. In the other six test tube, *rac*-**1a**-[D<sub>7</sub>] (27.8 mg, 0.1 mmol) was used instead *rac*-**1a**. These reactions were stopped at the time of 20 min, 40 min, 60 min, 80 min, 100 min and 120 min successively. The corresponding yield of each product was determined by <sup>1</sup>H NMR analysis with 1,3,5-trimethoxybenzene as the internal standard.

The corresponding data was listed below. KIE value =  $k_H/k_D = 0.90857/0.15429 = 5.89$

| t/min | <b>3aa</b><br>yield (%) | <b>3aa</b> -[D <sub>6</sub> ]<br>yield (%) |
|-------|-------------------------|--------------------------------------------|
| 5     | 10                      | /                                          |
| 10    | 14                      | /                                          |
| 15    | 19                      | /                                          |
| 20    | 23                      | 8                                          |
| 25    | 29                      | /                                          |
| 30    | 32                      | /                                          |
| 40    | /                       | 11                                         |
| 60    | /                       | 15                                         |
| 80    | /                       | 18                                         |
| 100   | /                       | 21                                         |
| 120   | /                       | 23                                         |

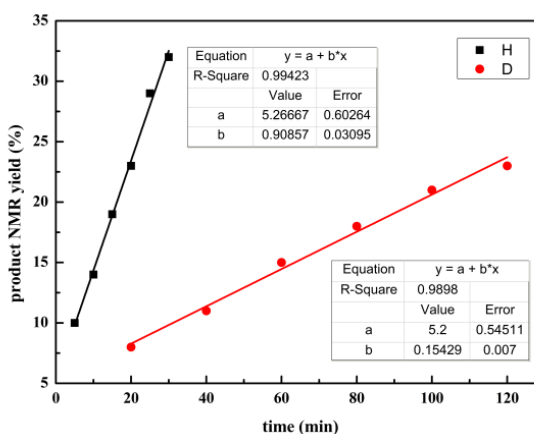

## 2.6 Gram-scale reaction

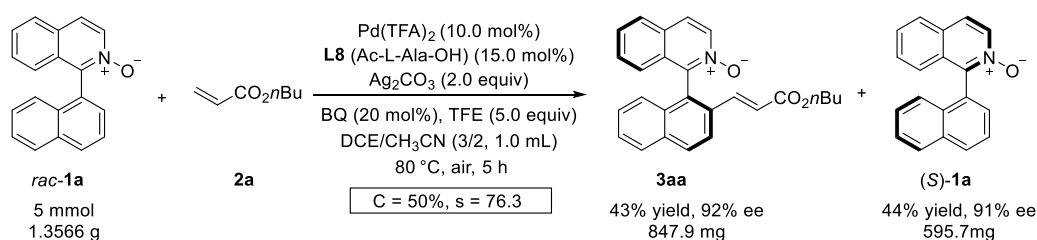

In a pressure flask, *rac*-**1a** (1.3566 g, 5.0 mmol), BQ (0.1081 g, 1.0 mmol), **L8** (Ac-L-Ala-OH)



(98.4 mg, 0.75 mmol), Pd(TFA)<sub>2</sub> (166.2 mg, 0.5 mmol), and Ag<sub>2</sub>CO<sub>3</sub> (2.7575 g, 10.0 mmol) were added. Then, DCE/CH<sub>3</sub>CN (6/4, v/v, 50.0 mL), **2a** (2.15 mL, 15 mmol), and TFE (1768 μL, 25 mmol) were added successively. The reaction was stirred under air at 80 °C for 5 h. After the reaction was complete (monitoring by TLC), the reaction mixture was filtered through a pad of celite. Subsequently, the reaction mixture was concentrated under vacuum. The residue was purified by flash column chromatography on silica gel (eluent: petroleum ether/ethyl acetate = 1/10 to 1/20, v/v) to give the recovered (*S*)-**1a** (595.7 mg, 44% yield, 91% ee) and products **3aa** (847.9 mg, 43% yield, 92% ee). The enantiomeric ratios of (*S*)-**1a** and (*S*)-**3aa** were determined by chiral HPLC analysis.

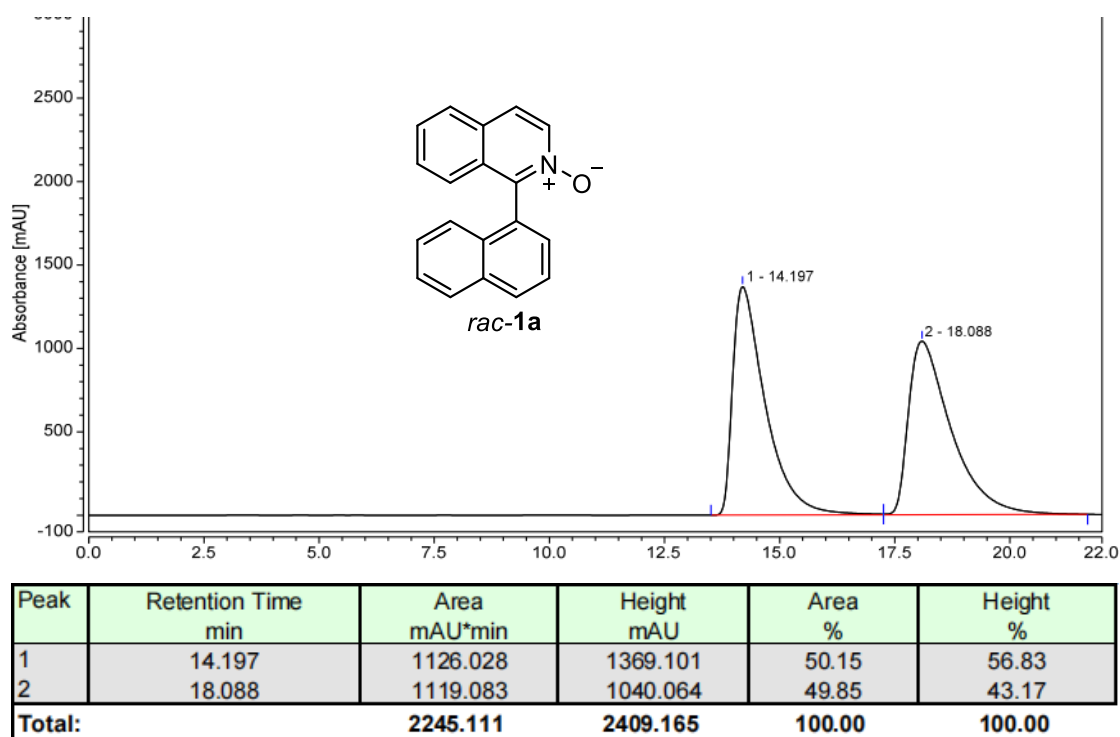

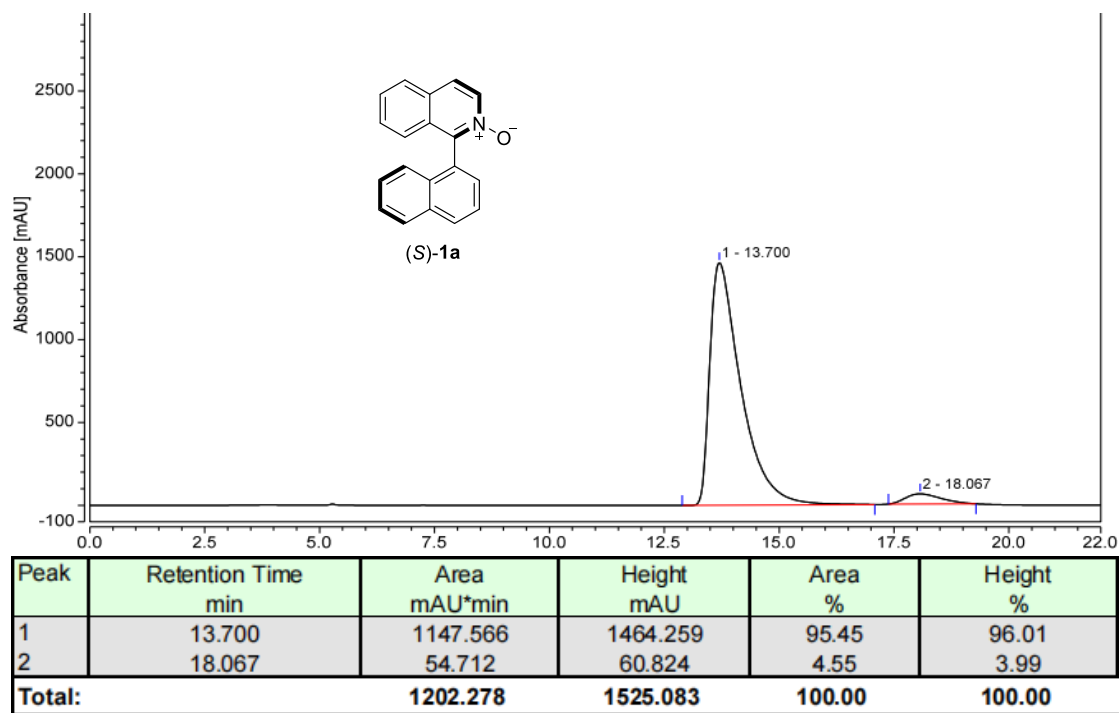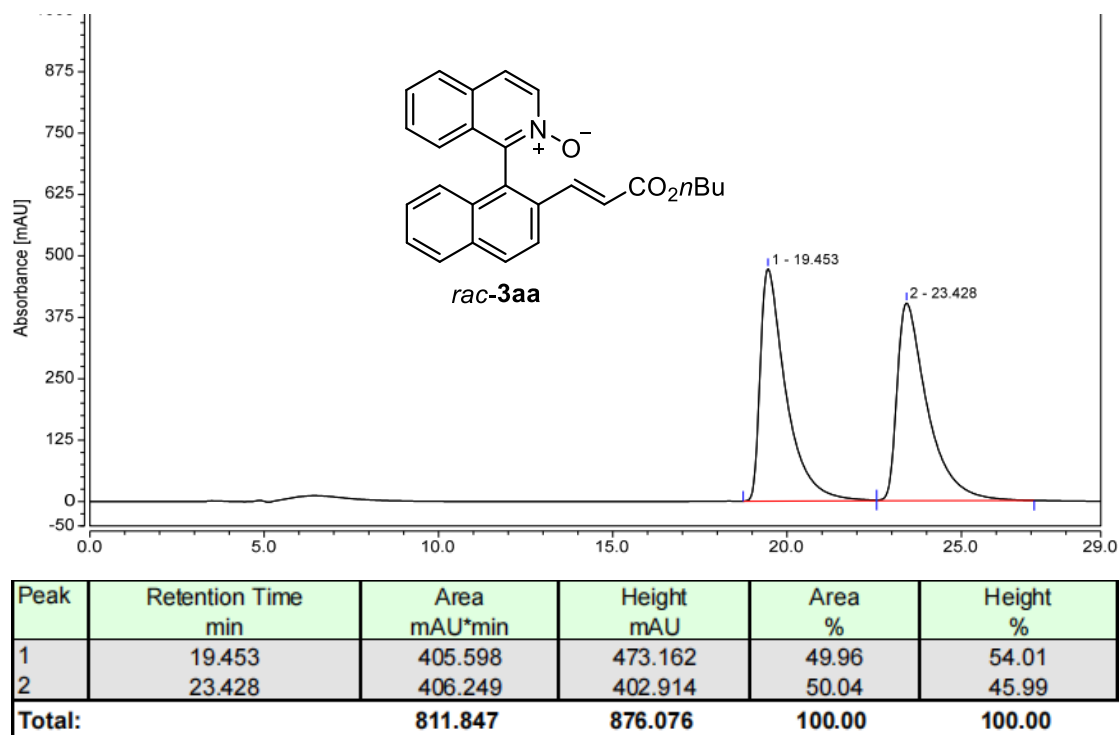

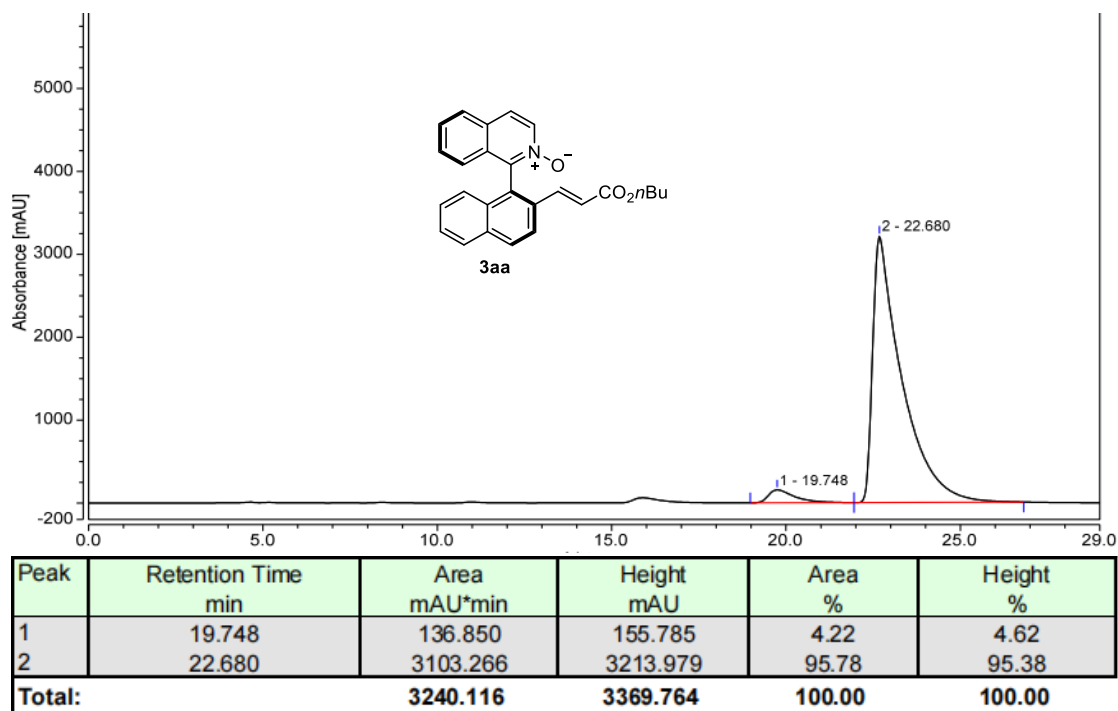

## 2.7 Derivatization of recovered (*S*)-**1a** and product **3aa**<sup>3</sup>

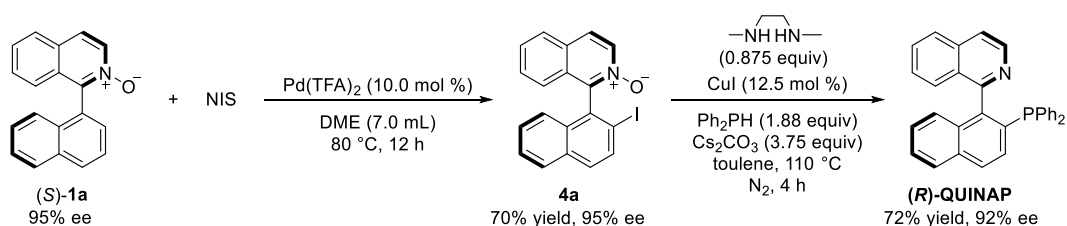

To 25 mL pressure tube, the recovered (*S*)-**1a** (189.9 mg, 0.7 mmol, 95% ee), NIS (236.2 mg, 1.05 mmol, 1.5 equiv), Pd(TFA)<sub>2</sub> (23.3 mg, 0.07 mmol) and DME (7.0 mL) was added successively, and the tube was sealed. The reaction mixture was stirred at 80 °C for 12 h. After cooling to room temperature, the reaction mixture was quenched with saturated Na<sub>2</sub>S<sub>2</sub>O<sub>3</sub> aqueous solution and extracted with ethyl acetate. The combined organic layers were dried over anhydrous Na<sub>2</sub>SO<sub>4</sub> and filtrated. The solvent was removed under reduced pressure and the residue was purified by silica gel column chromatography (petroleum ether/ethyl acetate = 1/10, v/v) to afford the corresponding product **4a** as foam solid with 70% yield (194.5 mg, 95% ee).

In a 10 mL Schlenk-type sealed tube, **4a** (39.7 mg, 0.1 mmol), CuI (2.4 mg, 0.0125 mmol), Cs<sub>2</sub>CO<sub>3</sub> (122.2 mg, 0.375 mmol) were added. Then, toluene (1.0 mL), *N,N*-dimethylethylenediamine (9.5 μL, 0.0875 mmol), Ph<sub>2</sub>PH (44 μL, 0.25 mmol), were added successively under nitrogen atmosphere. The reaction was stirred under air at 110 °C for 4 h. After cooling to room temperature, the reaction was quenched with H<sub>2</sub>O and extracted with ethyl acetate.

The solvent was removed under reduced pressure and the residue was purified by silica gel column chromatography (petroleum ether/ethyl acetate = 3/1, v/v) to afford the corresponding product (*R*)-QUINAP as white solid with 72% yield and 92% ee (31.6 mg).

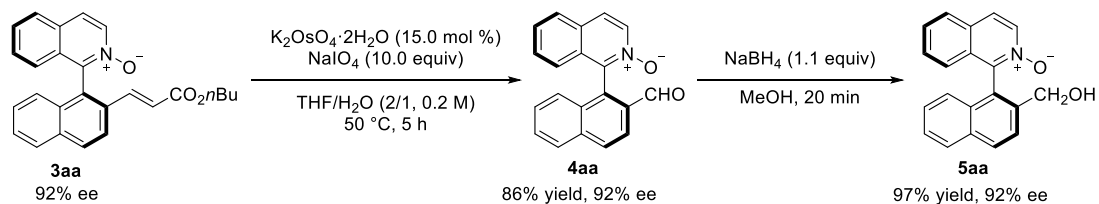

To a solution of **3aa** (79.5 mg, 0.2 mmol, 92% ee) in THF (1.4 mL) and H<sub>2</sub>O (0.7 mL), K<sub>2</sub>OsO<sub>4</sub>·2H<sub>2</sub>O (11.1 mg, 0.03 mmol) and NaIO<sub>4</sub> (427.8 mg, 2.0 mmol) were added, the reaction mixture was stirred at 50 °C for 4 h. The reaction mixture was then stopped by the addition with saturated Na<sub>2</sub>S<sub>2</sub>O<sub>3</sub> aqueous solution (5.0 mL) and stirred for 30 min. The biphasic reaction mixture was extracted with EtOAc, dried over Na<sub>2</sub>SO<sub>4</sub>, and concentrated. The crude product was purified by silica gel column chromatography (EtOAc /MeOH = 50:1) to afford the corresponding product **4aa** (51.4 mg, 86% yield, 92% ee).

To a solution of **4aa** (29.9 mg, 0.1 mmol) in MeOH (1.0 mL) was added portion-wise NaBH<sub>4</sub> (41.6 mg, 0.11 mmol). The reaction mixture effervesced upon addition of NaBH<sub>4</sub>. After 20 minutes the reaction was quenched with HCl aqueous solution (1.0 M, 3.0 mL) and extracted with CH<sub>2</sub>Cl<sub>2</sub>. The organic layer was concentrated under reduced pressure and the residue was purified by silica gel column chromatography (ethyl acetate/methanol = 30/1, v/v) to afford the corresponding product **5aa** (29.2 mg, 97% yield, 92% ee).

### 3. The analytical and spectral characterization data

#### (1) The analytical and spectral characterization data of starting materials

##### *rac*-1-(naphthalen-1-yl)isoquinoline-*N*-oxide (*rac*-1a) <sup>1</sup>

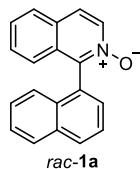

Foamy solid,  $R_f = 0.28$  (EtOAc/MeOH, 25/1, v/v). <sup>1</sup>H NMR (400 MHz, CDCl<sub>3</sub>)  $\delta$  8.37 (d,  $J = 7.2$  Hz, 1H), 8.05 (d,  $J = 8.4$  Hz, 1H), 7.96 (d,  $J = 8.4$  Hz, 1H), 7.84 (d,  $J = 8.4$  Hz, 1H), 7.76 (d,  $J = 7.2$  Hz, 1H), 7.71 – 7.63 (m, 1H), 7.61 – 7.46 (m, 3H), 7.44 – 7.33 (m, 2H), 7.29 (d,  $J = 8.4$  Hz, 1H), 7.21 (t,  $J = 8.4$  Hz, 1H). <sup>13</sup>C NMR (100 MHz, CDCl<sub>3</sub>)  $\delta$  145.5, 137.5, 133.8, 131.4, 130.3, 130.0, 129.2, 128.9, 128.9, 128.7, 128.4, 128.4, 127.0, 126.9, 126.4, 125.6, 125.1, 123.8. HRMS (ESI): exact mass calcd for C<sub>19</sub>H<sub>14</sub>NO<sup>+</sup> (M+H)<sup>+</sup> requires  $m/z$  272.1070, found  $m/z$  272.1071.

##### *rac*-6-methyl-1-(naphthalen-1-yl)isoquinoline-*N*-oxide (*rac*-1b) <sup>1</sup>

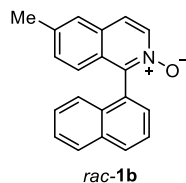

Foamy solid,  $R_f = 0.23$  (EtOAc/MeOH, 25/1, v/v). <sup>1</sup>H NMR (400 MHz, CDCl<sub>3</sub>)  $\delta$  8.34 (d,  $J = 7.2$  Hz, 1H), 8.04 (d,  $J = 8.4$  Hz, 1H), 7.96 (d,  $J = 8.0$  Hz, 1H), 7.71 – 7.59 (m, 3H), 7.56 – 7.46 (m, 2H), 7.42 – 7.35 (m, 1H), 7.29 (d,  $J = 8.4$  Hz, 1H), 7.21 (dd,  $J = 8.4, 1.6$  Hz, 1H), 7.11 (d,  $J = 8.4$  Hz, 1H), 2.47 (s, 3H). <sup>13</sup>C NMR (100 MHz, CDCl<sub>3</sub>)  $\delta$  145.3, 138.9, 137.5, 133.8, 131.4, 130.0, 129.2, 129.1, 128.6, 128.5, 128.4, 127.0, 126.3, 126.0, 125.5, 125.2, 123.2, 21.6. HRMS (ESI): exact mass calcd for C<sub>20</sub>H<sub>16</sub>NO<sup>+</sup> (M+H)<sup>+</sup> requires  $m/z$  286.1226, found  $m/z$  286.1228.

##### *rac*-6-isopropyl-1-(naphthalen-1-yl)isoquinoline-*N*-oxide (*rac*-1c)

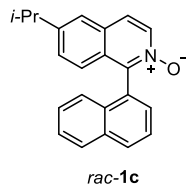

Foamy solid,  $R_f = 0.31$  (EtOAc/MeOH, 25/1, v/v). <sup>1</sup>H NMR (600 MHz, CDCl<sub>3</sub>)  $\delta$  8.35 (d,  $J = 7.2$  Hz, 1H), 8.05 (d,  $J = 7.8$  Hz, 1H), 7.96 (d,  $J = 8.4$  Hz, 1H), 7.73 (d,  $J = 7.2$  Hz, 1H), 7.69 – 7.63 (m,

2H), 7.55 – 7.48 (m, 2H), 7.41 – 7.36 (m, 1H), 7.30 (dd,  $J = 9.0, 1.8$  Hz, 2H), 7.15 (d,  $J = 8.4$  Hz, 1H), 3.09 – 3.00 (m, 1H), 1.31 (dd,  $J = 7.2, 3.0$  Hz, 6H).  $^{13}\text{C}$  NMR (150 MHz,  $\text{CDCl}_3$ )  $\delta$  149.6, 145.4, 137.5, 133.9, 131.4, 130.0, 129.3, 129.2, 129.1, 129.0, 128.7, 128.4, 127.0, 126.4, 125.8, 125.6, 125.2, 123.5, 123.4, 34.2, 23.7, 23.6. HRMS (ESI): exact mass calcd for  $\text{C}_{22}\text{H}_{20}\text{NO}^+$  ( $\text{M}+\text{H}$ ) $^+$  requires  $m/z$  314.1539, found  $m/z$  314.1538.

***rac*-6-chloro-1-(naphthalen-1-yl)isoquinoline-*N*-oxide (*rac*-1d)**<sup>1</sup>

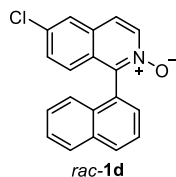

Foamy solid,  $R_f = 0.34$  (EtOAc/MeOH, 25/1, v/v).  $^1\text{H}$  NMR (600 MHz,  $\text{CDCl}_3$ )  $\delta$  8.35 (d,  $J = 7.2$  Hz, 1H), 8.04 (d,  $J = 8.4$  Hz, 1H), 7.95 (d,  $J = 7.8$  Hz, 1H), 7.82 (d,  $J = 2.4$  Hz, 1H), 7.69 – 7.62 (m, 2H), 7.53 – 7.48 (m, 2H), 7.42 – 7.36 (m, 1H), 7.31 (dd,  $J = 9.0, 1.8$  Hz, 1H), 7.24 (d,  $J = 8.4$  Hz, 1H), 7.14 (d,  $J = 9.0$  Hz, 1H).  $^{13}\text{C}$  NMR (150 MHz,  $\text{CDCl}_3$ )  $\delta$  145.6, 138.7, 134.6, 133.9, 131.3, 130.3, 130.1, 129.5, 128.8, 128.8, 128.5, 128.4, 127.3, 127.2, 126.6, 125.9, 125.6, 125.0, 122.8. HRMS (ESI): exact mass calcd for  $\text{C}_{19}\text{H}_{13}\text{ClNO}^+$  ( $\text{M}+\text{H}$ ) $^+$  requires  $m/z$  306.0680, found  $m/z$  306.0679.

***rac*-5-methyl-1-(naphthalen-1-yl)isoquinoline-*N*-oxide (*rac*-1e)**

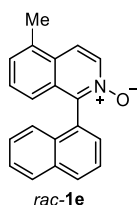

Foamy solid,  $R_f = 0.23$  (EtOAc/MeOH, 25/1, v/v).  $^1\text{H}$  NMR (400 MHz,  $\text{CDCl}_3$ )  $\delta$  8.41 (d,  $J = 7.2$  Hz, 1H), 8.02 (d,  $J = 8.4$  Hz, 1H), 7.94 (d,  $J = 8.0$  Hz, 1H), 7.90 (d,  $J = 7.2$  Hz, 1H), 7.65 (dd,  $J = 8.0, 7.2$  Hz, 1H), 7.56 – 7.44 (m, 2H), 7.39 – 7.27 (m, 3H), 7.21 (dd,  $J = 8.0, 6.8$  Hz, 1H), 7.05 (d,  $J = 8.4$  Hz, 1H), 2.66 (s, 3H).  $^{13}\text{C}$  NMR (100 MHz,  $\text{CDCl}_3$ )  $\delta$  145.4, 136.8, 134.0, 133.6, 131.2, 130.4, 129.7, 129.2, 129.0, 128.9, 128.5, 128.2, 128.0, 126.7, 126.1, 125.3, 125.0, 123.7, 120.3, 18.6. HRMS (ESI): exact mass calcd for  $\text{C}_{20}\text{H}_{16}\text{NO}^+$  ( $\text{M}+\text{H}$ ) $^+$  requires  $m/z$  286.1226, found  $m/z$  286.1228.

***rac*-1-(4-methoxynaphthalen-1-yl)isoquinoline-*N*-oxide (*rac*-1f)**<sup>1</sup>

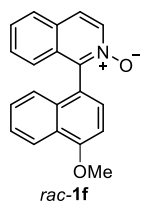

Foamy solid,  $R_f = 0.20$  (EtOAc/MeOH, 25/1, v/v).  **$^1\text{H NMR}$**  (600 MHz,  $\text{CDCl}_3$ )  $\delta$  8.38 (dd,  $J = 15.0$ , 8.4 Hz, 2H), 7.84 (d,  $J = 8.4$  Hz, 1H), 7.75 (d,  $J = 7.2$  Hz, 1H), 7.54 (t,  $J = 7.8$  Hz, 1H), 7.49 (t,  $J = 7.8$  Hz, 1H), 7.45 (d,  $J = 7.8$  Hz, 1H), 7.42 – 7.37 (m, 2H), 7.30 (t,  $J = 8.4$  Hz, 1H), 7.21 (t,  $J = 8.4$  Hz, 1H), 7.00 (d,  $J = 8.4$  Hz, 1H), 4.09 (s, 3H).  **$^{13}\text{C NMR}$**  (150 MHz,  $\text{CDCl}_3$ )  $\delta$  156.9, 145.9, 137.7, 132.4, 130.8, 129.1, 129.0, 129.0, 128.3, 127.5, 126.9, 126.1, 126.0, 125.7, 125.0, 123.6, 122.8, 121.0, 103.7, 55.8. **HRMS** (ESI): exact mass calcd for  $\text{C}_{20}\text{H}_{16}\text{NO}_2^+$  ( $\text{M}+\text{H}$ ) $^+$  requires  $m/z$  302.1176, found  $m/z$  302.1178.

***rac-1-(4-methylnaphthalen-1-yl)isoquinoline-N-oxide (rac-1g)***<sup>1</sup>

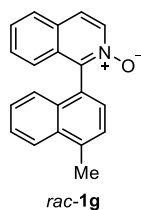

Foamy solid,  $R_f = 0.26$  (EtOAc/MeOH, 25/1, v/v).  **$^1\text{H NMR}$**  (600 MHz,  $\text{CDCl}_3$ )  $\delta$  8.36 (d,  $J = 7.2$  Hz, 1H), 8.11 (d,  $J = 8.4$  Hz, 1H), 7.84 (d,  $J = 8.4$  Hz, 1H), 7.76 (d,  $J = 7.2$  Hz, 1H), 7.57 – 7.48 (m, 3H), 7.44 – 7.35 (m, 3H), 7.26 (dd,  $J = 18.0$ , 8.4 Hz, 2H), 2.81 (s, 3H).  **$^{13}\text{C NMR}$**  (150 MHz,  $\text{CDCl}_3$ )  $\delta$  145.9, 137.0, 136.8, 133.1, 131.4, 130.6, 129.2, 128.9, 128.4, 128.2, 127.3, 126.9, 126.8, 126.5, 125.9, 125.8, 124.9, 123.7, 19.8. **HRMS** (ESI): exact mass calcd for  $\text{C}_{20}\text{H}_{16}\text{NO}^+$  ( $\text{M}+\text{H}$ ) $^+$  requires  $m/z$  286.1226, found  $m/z$  286.1225.

***rac-1-(4-fluoronaphthalen-1-yl)isoquinoline-N-oxide (rac-1h)***<sup>1</sup>

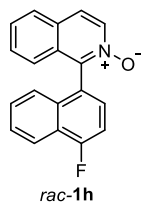

Foamy solid,  $R_f = 0.28$  (EtOAc/MeOH, 25/1, v/v).  **$^1\text{H NMR}$**  (600 MHz,  $\text{CDCl}_3$ )  $\delta$  8.36 (d,  $J = 7.2$  Hz, 1H), 8.23 (d,  $J = 8.4$  Hz, 1H), 7.86 (d,  $J = 7.8$  Hz, 1H), 7.78 (d,  $J = 7.2$  Hz, 1H), 7.60 – 7.52 (m, 2H), 7.50 – 7.38 (m, 3H), 7.37 – 7.31 (m, 1H), 7.29 – 7.24 (m, 1H), 7.22 (d,  $J = 8.4$  Hz, 1H).  **$^{13}\text{C NMR}$**  (150 MHz,  $\text{CDCl}_3$ )  $\delta$  159.9 (d,  $J = 252.0$  Hz), 144.9, 137.6, 133.0 (d,  $J = 6.0$  Hz), 130.5,

129.4, 129.0, 128.6 (d,  $J = 9.0$  Hz), 128.5, 128.1, 127.0, 126.8, 125.6, 125.2 (d,  $J = 1.5$  Hz), 124.9 (d,  $J = 6.0$  Hz), 124.3 (d,  $J = 16.5$  Hz), 124.0, 121.4 (d,  $J = 6.0$  Hz), 109.5 (d,  $J = 19.5$  Hz).  **$^{19}\text{F}$  NMR** (565 MHz,  $\text{CDCl}_3$ )  $\delta$  -120.1. **HRMS** (ESI): exact mass calcd for  $\text{C}_{19}\text{H}_{13}\text{FNO}^+$  ( $\text{M}+\text{H}$ )<sup>+</sup> requires  $m/z$  290.0976, found  $m/z$  290.0977.

***rac*-1-(6-methoxynaphthalen-1-yl)isoquinoline-*N*-oxide (*rac*-1i)**

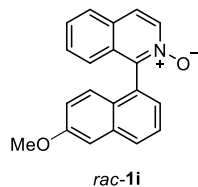

Foamy solid,  $R_f = 0.10$  (EtOAc/MeOH, 25/1, v/v).  **$^1\text{H}$  NMR** (600 MHz,  $\text{CDCl}_3$ )  $\delta$  8.33 (d,  $J = 7.2$  Hz, 1H), 8.03 (d,  $J = 8.4$  Hz, 1H), 7.95 (d,  $J = 8.4$  Hz, 1H), 7.64 (t,  $J = 7.2$  Hz, 2H), 7.54 – 7.47 (m, 2H), 7.38 (t,  $J = 7.2$  Hz, 1H), 7.29 (d,  $J = 8.4$  Hz, 1H), 7.16 – 7.08 (m, 2H), 7.02 (dd,  $J = 9.6, 2.4$  Hz, 1H), 3.90 (s, 3H).  **$^{13}\text{C}$  NMR** (150 MHz,  $\text{CDCl}_3$ )  $\delta$  159.7, 145.4, 137.8, 133.8, 131.4, 130.8, 130.0, 129.1, 128.7, 128.4, 127.5, 127.0, 126.4, 125.6, 125.5, 125.2, 122.7, 121.6, 105.5, 55.7. **HRMS** (ESI): exact mass calcd for  $\text{C}_{20}\text{H}_{16}\text{NO}_2^+$  ( $\text{M}+\text{H}$ )<sup>+</sup> requires  $m/z$  302.1176, found  $m/z$  302.1175.

***rac*-6-methyl-1-(4-methylnaphthalen-1-yl)isoquinoline-*N*-oxide (*rac*-1j) <sup>1</sup>**

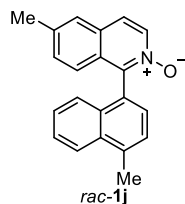

Foamy solid,  $R_f = 0.25$  (EtOAc/MeOH, 25/1, v/v).  **$^1\text{H}$  NMR** (600 MHz,  $\text{CDCl}_3$ )  $\delta$  8.34 (d,  $J = 7.2$  Hz, 1H), 8.12 (d,  $J = 8.4$  Hz, 1H), 7.68 (d,  $J = 7.2$  Hz, 1H), 7.62 (s, 1H), 7.56 – 7.52 (m, 1H), 7.51 (d,  $J = 7.2$  Hz, 1H), 7.42 (d,  $J = 7.2$  Hz, 1H), 7.40 – 7.36 (m, 1H), 7.28 (d,  $J = 8.4$  Hz, 1H), 7.22 (dd,  $J = 8.4, 1.2$  Hz, 1H), 7.15 (d,  $J = 8.4$  Hz, 1H), 2.81 (s, 3H), 2.49 (s, 3H).  **$^{13}\text{C}$  NMR** (150 MHz,  $\text{CDCl}_3$ )  $\delta$  145.7, 138.9, 137.6, 136.7, 133.1, 131.4, 131.4, 129.3, 128.8, 128.1, 127.4, 126.7, 126.4, 126.3, 126.1, 125.8, 125.8, 124.9, 123.1, 21.7, 19.8. **HRMS** (ESI): exact mass calcd for  $\text{C}_{21}\text{H}_{18}\text{NO}^+$  ( $\text{M}+\text{H}$ )<sup>+</sup> requires  $m/z$  300.1383, found  $m/z$  300.1382.

***rac*-1-(4-fluoronaphthalen-1-yl)-6-methylisoquinoline-*N*-oxide (*rac*-1k) <sup>1</sup>**



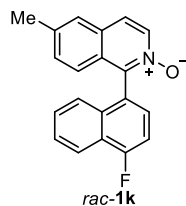

Foamy solid,  $R_f = 0.25$  (EtOAc/MeOH, 25/1, v/v).  $^1\text{H NMR}$  (600 MHz,  $\text{CDCl}_3$ )  $\delta$  8.34 (d,  $J = 7.2$  Hz, 1H), 8.22 (d,  $J = 8.4$  Hz, 1H), 7.71 (d,  $J = 7.2$  Hz, 1H), 7.64 (s, 1H), 7.59 – 7.54 (m, 1H), 7.49 – 7.41 (m, 2H), 7.33 (dd,  $J = 10.2, 7.8$  Hz, 1H), 7.29 – 7.23 (m, 2H), 7.12 (d,  $J = 9.0$  Hz, 1H), 2.49 (s, 3H).  $^{13}\text{C NMR}$  (150 MHz,  $\text{CDCl}_3$ )  $\delta$  159.8 (d,  $J = 253.5$  Hz), 144.7, 139.1, 137.5, 132.9 (d,  $J = 4.5$  Hz), 131.6, 129.3, 128.6, 128.6 (d,  $J = 9.0$  Hz), 128.0, 126.8, 126.2, 125.4, 125.2 (d,  $J = 3.0$  Hz), 125.0 (d,  $J = 4.5$  Hz), 124.2 (d,  $J = 16.5$  Hz), 123.4, 121.3 (d,  $J = 6.0$  Hz), 109.5 (d,  $J = 21.0$  Hz), 21.7.  $^{19}\text{F NMR}$  (565 MHz,  $\text{CDCl}_3$ )  $\delta$  -120.2. **HRMS** (ESI): exact mass calcd for  $\text{C}_{20}\text{H}_{15}\text{FNO}^+$  ( $\text{M}+\text{H}$ ) $^+$  requires  $m/z$  304.1132, found  $m/z$  304.1132.

***rac-1-(4-fluoronaphthalen-1-yl)-6-methoxyisoquinoline-N-oxide (rac-1l)***

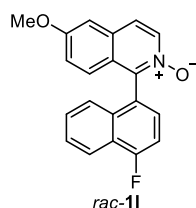

Foamy solid,  $R_f = 0.12$  (EtOAc/MeOH, 25/1, v/v).  $^1\text{H NMR}$  (600 MHz,  $\text{CDCl}_3$ )  $\delta$  8.33 (d,  $J = 7.2$  Hz, 1H), 8.22 (d,  $J = 8.4$  Hz, 1H), 7.67 (d,  $J = 7.2$  Hz, 1H), 7.59 – 7.54 (m, 1H), 7.48 – 7.42 (m, 2H), 7.32 (dd,  $J = 10.2, 7.8$  Hz, 1H), 7.28 (d,  $J = 8.4$  Hz, 1H), 7.16 – 7.11 (m, 2H), 7.06 (d,  $J = 9.6, 2.4$  Hz, 1H), 3.93 (s, 3H).  $^{13}\text{C NMR}$  (150 MHz,  $\text{CDCl}_3$ )  $\delta$  159.8 (d,  $J = 253.5$  Hz), 159.8, 144.8, 137.9, 133.0 (d,  $J = 6.0$  Hz), 130.9, 128.6 (d,  $J = 9.0$  Hz), 128.1, 127.4, 126.8, 125.7, 125.3 (d,  $J = 1.5$  Hz), 125.1 (d,  $J = 4.5$  Hz), 124.3 (d,  $J = 16.5$  Hz), 122.8, 121.9, 121.3 (d,  $J = 4.5$  Hz), 109.5 (d,  $J = 19.5$  Hz), 105.6, 55.7.  $^{19}\text{F NMR}$  (565 MHz,  $\text{CDCl}_3$ )  $\delta$  -120.2. **HRMS** (ESI): exact mass calcd for  $\text{C}_{20}\text{H}_{15}\text{FNO}_2^+$  ( $\text{M}+\text{H}$ ) $^+$  requires  $m/z$  320.1081, found  $m/z$  320.1085.

***rac-1-(naphthalen-1-yl)benzo[h]isoquinoline-N-oxide (rac-1m)***

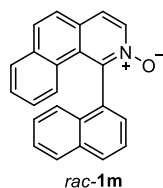

Foamy solid,  $R_f = 0.25$  (EtOAc/MeOH, 25/1, v/v).  $^1\text{H NMR}$  (400 MHz,  $\text{CDCl}_3$ )  $\delta$  8.55 (d,  $J = 7.2$  Hz, 1H), 8.11 (d,  $J = 8.0$  Hz, 1H), 8.02 (d,  $J = 8.4$  Hz, 1H), 7.86 – 7.76 (m, 3H), 7.72 – 7.62 (m, 2H), 7.57 – 7.50 (m, 2H), 7.57 – 7.48 (m, 2H), 7.46 – 7.36 (m, 3H), 7.11 (d,  $J = 8.8$  Hz, 1H), 6.96 – 6.89 (m, 1H).  $^{13}\text{C NMR}$  (100 MHz,  $\text{CDCl}_3$ )  $\delta$  146.5, 137.5, 134.2, 134.1, 133.6, 131.3, 130.6, 129.9, 129.6, 129.0, 128.9, 128.1, 127.8, 127.6, 127.3, 127.2, 127.0, 126.9, 126.7, 126.6, 124.9, 124.7, 124.2. **HRMS** (ESI): exact mass calcd for  $\text{C}_{23}\text{H}_{16}\text{NO}^+$  ( $\text{M}+\text{H}$ ) $^+$  requires  $m/z$  322.1226, found  $m/z$  322.1229.

***rac*-1-(pyren-1-yl)isoquinoline-*N*-oxide (*rac*-1n)**

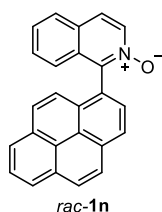

Foamy solid,  $R_f = 0.18$  (EtOAc/MeOH, 25/1, v/v).  $^1\text{H NMR}$  (400 MHz,  $\text{CDCl}_3$ )  $\delta$  8.45 (d,  $J = 7.2$  Hz, 1H), 8.38 (d,  $J = 8.0$  Hz, 1H), 8.24 (d,  $J = 7.6$  Hz, 1H), 8.21 – 8.14 (m, 3H), 8.08 – 7.98 (m, 3H), 7.86 (d,  $J = 8.0$  Hz, 1H), 7.81 (d,  $J = 7.2$  Hz, 1H), 7.57 – 7.49 (m, 2H), 7.37 – 7.31 (m, 1H), 7.16 (d,  $J = 8.4$  Hz, 1H).  $^{13}\text{C NMR}$  (100 MHz,  $\text{CDCl}_3$ )  $\delta$  145.9, 137.7, 132.5, 131.2, 131.0, 130.6, 129.9, 129.3, 129.0, 128.8, 128.6, 128.4, 127.9, 127.4, 127.0, 126.3, 125.8, 125.8, 125.7, 125.1, 124.8, 124.5, 123.9. **HRMS** (ESI): exact mass calcd for  $\text{C}_{25}\text{H}_{16}\text{NO}^+$  ( $\text{M}+\text{H}$ ) $^+$  requires  $m/z$  346.1226, found  $m/z$  346.1221.

**(2) The analytical and spectral characterization data of the recovered material and products**

**(*S*)-1-(naphthalen-1-yl)isoquinoline-*N*-oxide ((*S*)-1a) <sup>1</sup>**

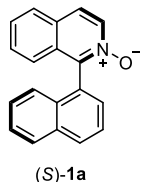

Foamy solid, 12.4 mg, 46% yield, 95% ee. **HPLC** CHIRALCEL OD-H, *n*-hexane/2-propanol = 70/30, flow rate = 1.0 mL/min,  $\lambda = 256$  nm, retention time: 13.657 min, 18.048 min.  $[\alpha]_D^{25} = +330.14$  ( $c = 0.230$ ,  $\text{CH}_2\text{Cl}_2$ ).

**(*S*)-1-(2-(3-butoxy-3-oxoprop-1-en-1-yl)naphthalen-1-yl)isoquinoline-*N*-oxide (3aa)**

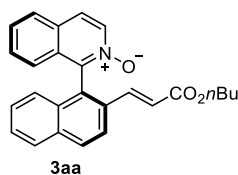

Foamy solid, 17.7 mg, 45% yield, m.p.: 77.2-79.6 °C, 93% ee.  $R_f = 0.52$  (EtOAc/MeOH, 50/1, v/v). **HPLC** CHIRALCEL IA, *n*-hexane/2-propanol = 70/30, flow rate = 0.8 mL/min,  $\lambda = 250$  nm, retention time: 19.930 min, 23.317 min.  $[\alpha]_D^{25} = -93.02$  ( $c = 0.334$ , CH<sub>2</sub>Cl<sub>2</sub>). **<sup>1</sup>H NMR** (600 MHz, CDCl<sub>3</sub>)  $\delta$  8.37 (d,  $J = 7.2$  Hz, 1H), 8.03 (d,  $J = 9.0$  Hz, 1H), 7.95 – 7.89 (m, 2H), 7.87 (d,  $J = 8.4$  Hz, 1H), 7.83 (d,  $J = 7.2$  Hz, 1H), 7.58 – 7.45 (m, 2H), 7.41 – 7.29 (m, 2H), 7.24 (d,  $J = 16.2$  Hz, 1H), 7.11 (d,  $J = 8.4$  Hz, 1H), 6.97 (d,  $J = 8.4$  Hz, 1H), 6.53 (d,  $J = 15.6$  Hz, 1H), 4.09 – 3.97 (m, 2H), 1.59 – 1.46 (m, 2H), 1.32 – 1.18 (m, 2H), 0.85 (t,  $J = 7.2$  Hz, 3H). **<sup>13</sup>C NMR** (150 MHz, CDCl<sub>3</sub>)  $\delta$  166.5, 143.2, 141.1, 137.6, 134.4, 132.2, 131.6, 130.4, 130.3, 130.0, 129.8, 128.6, 128.6, 127.8, 127.5, 127.2, 125.6, 124.9, 124.4, 123.2, 121.2, 64.3, 30.6, 19.1, 13.7. **HRMS** (ESI): exact mass calcd for C<sub>26</sub>H<sub>23</sub>NNaO<sub>3</sub><sup>+</sup> (M+Na)<sup>+</sup> requires  $m/z$  420.1570, found  $m/z$  420.1565.

**(S)-6-methyl-1-(naphthalen-1-yl)isoquinoline-N-oxide ((S)-1b)**<sup>1</sup>

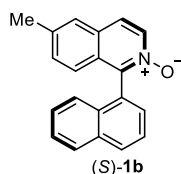

Foamy solid, 11.3 mg, 40% yield, 97% ee. **HPLC** CHIRALCEL OD-H, *n*-hexane/2-propanol = 70/30, flow rate = 1.0 mL/min,  $\lambda = 256$  nm, retention time: 13.270 min, 17.678 min.  $[\alpha]_D^{25} = +272.57$  ( $c = 0.226$ , CH<sub>2</sub>Cl<sub>2</sub>).

**(S)-1-(2-(3-butoxy-3-oxoprop-1-en-1-yl)naphthalen-1-yl)-6-methyl-isoquinoline-N-oxide (3ba)**

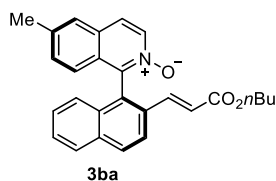

Foamy solid, 20.7 mg, 50% yield, m.p.: 165.8-166.8 °C, 87% ee.  $R_f = 0.43$  (EtOAc/MeOH, 50/1, v/v). **HPLC** CHIRALCEL IA, *n*-hexane/2-propanol = 70/30, flow rate = 1.0 mL/min,  $\lambda = 256$  nm, retention time: 13.727 min, 15.453 min.  $[\alpha]_D^{25} = -107.57$  ( $c = 0.414$ , CH<sub>2</sub>Cl<sub>2</sub>). **<sup>1</sup>H NMR** (400 MHz, CDCl<sub>3</sub>)  $\delta$  8.34 (d,  $J = 7.2$  Hz, 1H), 8.02 (d,  $J = 8.8$  Hz, 1H), 7.94 – 7.87 (m, 2H), 7.74 (d,  $J = 7.2$  Hz, 1H), 7.64 (s, 1H), 7.53 – 7.45 (m, 1H), 7.36 – 7.29 (m, 1H), 7.28 – 7.16 (m, 2H), 7.12 (d,  $J =$

8.4 Hz, 1H), 6.87 (d,  $J = 8.8$  Hz, 1H), 6.52 (d,  $J = 16.0$  Hz, 1H), 4.10 – 3.97 (m, 2H), 2.46 (s, 3H), 1.59 – 1.46 (m, 2H), 1.32 – 1.18 (m, 2H), 0.85 (t,  $J = 7.2$  Hz, 3H).  $^{13}\text{C}$  NMR (100 MHz,  $\text{CDCl}_3$ )  $\delta$  166.5, 143.0, 141.2, 139.1, 137.5, 134.4, 132.1, 131.9, 131.6, 130.3, 130.1, 128.9, 128.5, 127.7, 127.4, 126.3, 125.7, 124.8, 123.8, 123.1, 121.0, 64.3, 30.6, 21.7, 19.1, 13.7. **HRMS** (ESI): exact mass calcd for  $\text{C}_{27}\text{H}_{26}\text{NO}_3^+$  ( $\text{M}+\text{H}$ ) $^+$  requires  $m/z$  412.1907, found  $m/z$  412.1907.

**(S)-6-isopropyl-1-(naphthalen-1-yl)isoquinoline-N-oxide ((S)-1c)**

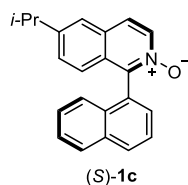

Foamy solid, 13.8 mg, 44% yield, m.p.: 210.2-212.4 °C, 98% ee. **HPLC** CHIRALCEL IA, *n*-hexane/2-propanol = 70/30, flow rate = 1.0 mL/min,  $\lambda = 256$  nm, retention time: 6.693 min, 8.548 min.  $[\alpha]_{\text{D}}^{25} = +326.67$  ( $c = 0.1$ ,  $\text{CH}_2\text{Cl}_2$ ).

**(S)-1-(2-(3-butoxy-3-oxoprop-1-en-1-yl)naphthalen-1-yl)-6-isopropyl-isoquinoline-N-oxide**

**(3ca)**

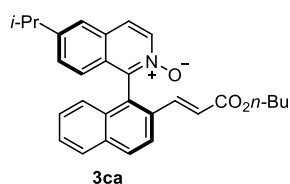

Foamy solid, 20.5 mg, 47% yield, m.p.: 171.7-173.9 °C, 86% ee.  $R_f = 0.46$  (EtOAc/MeOH, 50/1, v/v). **HPLC** CHIRALCEL AD, *n*-hexane/2-propanol = 70/30, flow rate = 1.0 mL/min,  $\lambda = 256$  nm, retention time: 7.752 min, 9.210 min.  $[\alpha]_{\text{D}}^{25} = -128.06$  ( $c = 0.354$ ,  $\text{CH}_2\text{Cl}_2$ ).  $^1\text{H}$  NMR (600 MHz,  $\text{CDCl}_3$ )  $\delta$  8.37 (d,  $J = 7.2$  Hz, 1H), 8.04 (d,  $J = 9.0$  Hz, 1H), 7.96 – 7.89 (m, 2H), 7.78 (d,  $J = 7.2$  Hz, 1H), 7.68 (s, 1H), 7.53 – 7.48 (m, 1H), 7.36 – 7.31 (m, 1H), 7.27 (dd,  $J = 9.0, 1.8$  Hz, 1H), 7.24 (d,  $J = 15.6$  Hz, 1H), 7.12 (d,  $J = 8.4$  Hz, 1H), 6.90 (d,  $J = 8.4$  Hz, 1H), 6.52 (d,  $J = 16.2$  Hz, 1H), 4.10 – 3.96 (m, 2H), 3.09 – 2.98 (m, 1H), 1.57 – 1.49 (m, 2H), 1.31 (d,  $J = 7.2$  Hz, 6H), 1.29 – 1.21 (m, 2H), 0.86 (t,  $J = 7.2$  Hz, 3H).  $^{13}\text{C}$  NMR (150 MHz,  $\text{CDCl}_3$ )  $\delta$  166.6, 149.9, 143.1, 141.3, 137.6, 134.5, 132.2, 131.7, 130.4, 130.2, 129.8, 129.1, 129.0, 128.6, 127.8, 127.6, 125.8, 125.1, 124.2, 123.7, 123.2, 121.1, 64.4, 34.3, 30.7, 23.7, 23.6, 19.2, 13.8. **HRMS** (ESI): exact mass calcd for  $\text{C}_{29}\text{H}_{30}\text{NO}_3^+$  ( $\text{M}+\text{H}$ ) $^+$  requires  $m/z$  440.2220, found  $m/z$  440.2220.

**(S)-6-chloro-1-(naphthalen-1-yl)isoquinoline-N-oxide ((S)-1d)<sup>1</sup>**

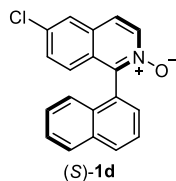

Foamy solid, 14.0 mg, 52% yield, 82% ee. **HPLC** CHIRALCEL AD, *n*-hexane/2-propanol = 70/30, flow rate = 1.0 mL/min,  $\lambda$  = 256 nm, retention time: 7.720 min, 9.473 min.  $[\alpha]_D^{25} = +239.09$  ( $c = 0.278$ ,  $\text{CH}_2\text{Cl}_2$ ).

**(S)-1-(2-(3-butoxy-3-oxoprop-1-en-1-yl)naphthalen-1-yl)-6-chloro-isoquinoline-N-oxide (3da)**

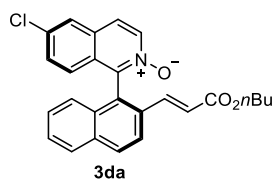

Foamy solid, 19.4 mg, 45% yield, m.p.: 203.5-204.7 °C, 94% ee.  $R_f = 0.60$  (EtOAc/MeOH, 50/1, v/v). **HPLC** CHIRALCEL AD, *n*-hexane/2-propanol = 70/30, flow rate = 1.0 mL/min,  $\lambda$  = 256 nm, retention time: 14.443 min, 21.577 min.  $[\alpha]_D^{25} = -107.22$  ( $c = 0.388$ ,  $\text{CH}_2\text{Cl}_2$ ).  **$^1\text{H NMR}$**  (400 MHz,  $\text{CDCl}_3$ )  $\delta$  8.39 (d,  $J = 7.2$  Hz, 1H), 8.06 (d,  $J = 8.8$  Hz, 1H), 7.93 (t,  $J = 8.4$  Hz, 2H), 7.88 (d,  $J = 2.0$  Hz, 1H), 7.76 (d,  $J = 7.2$  Hz, 1H), 7.57 – 7.48 (m, 1H), 7.39 – 7.28 (m, 2H), 7.20 (d,  $J = 16.0$  Hz, 1H), 7.08 (d,  $J = 8.8$  Hz, 1H), 6.91 (d,  $J = 8.8$  Hz, 1H), 6.52 (d,  $J = 15.6$  Hz, 1H), 4.13 – 3.96 (m, 2H), 1.61 – 1.48 (m, 2H), 1.35 – 1.19 (m, 2H), 0.87 (t,  $J = 7.2$  Hz, 3H).  **$^{13}\text{C NMR}$**  (100 MHz,  $\text{CDCl}_3$ )  $\delta$  166.5, 143.4, 140.9, 138.9, 135.0, 134.5, 132.4, 131.6, 130.8, 130.8, 129.3, 129.2, 128.9, 128.8, 128.0, 127.7, 126.6, 126.2, 125.5, 123.4, 123.3, 121.5, 64.5, 30.7, 19.2, 13.8. **HRMS** (ESI): exact mass calcd for  $\text{C}_{26}\text{H}_{22}\text{ClNNaO}_3^+$  ( $\text{M}+\text{Na}$ ) $^+$  requires  $m/z$  454.1180, found  $m/z$  454.1175.

**(S)-5-methyl-1-(naphthalen-1-yl)isoquinoline-N-oxide ((S)-1e)**

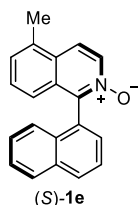

Foamy solid, 11.8 mg, 41% yield, m.p.: 205.4-207.6 °C, 95% ee. **HPLC** CHIRALCEL OD-H, *n*-hexane/2-propanol = 70/30, flow rate = 1.0 mL/min,  $\lambda$  = 256 nm, retention time: 16.168 min, 19.820 min.  $[\alpha]_D^{25} = +238.12$  ( $c = 0.212$ ,  $\text{CH}_2\text{Cl}_2$ ).

**(S)-1-(2-(3-butoxy-3-oxoprop-1-en-1-yl)naphthalen-1-yl)-5-methylisoquinoline-N-oxide (3ea)**

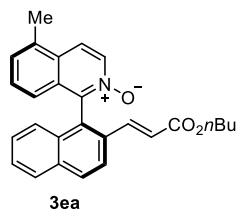

Foamy solid, 19.4 mg, 47% yield, m.p.: 158.9-160.8 °C, 88% ee,  $R_f = 0.42$  (EtOAc/MeOH, 50/1, v/v). **HPLC** CHIRALCEL AD, *n*-hexane/2-propanol = 70/30, flow rate = 1.0 mL/min,  $\lambda = 256$  nm, retention time: 15.225 min, 21.807 min.  $[\alpha]_D^{25} = -122.32$  ( $c = 0.414$ , CH<sub>2</sub>Cl<sub>2</sub>). **<sup>1</sup>H NMR** (400 MHz, CDCl<sub>3</sub>)  $\delta$  8.45 (d,  $J = 7.2$  Hz, 1H), 8.05 (d,  $J = 8.8$  Hz, 1H), 8.01 (d,  $J = 7.2$  Hz, 1H), 7.94 (d,  $J = 8.8$  Hz, 2H), 7.52 (t,  $J = 7.2$  Hz, 1H), 7.41 – 7.32 (m, 2H), 7.31 – 7.23 (m, 2H), 7.13 (d,  $J = 8.4$  Hz, 1H), 6.85 (d,  $J = 8.8$  Hz, 1H), 6.56 (d,  $J = 15.6$  Hz, 1H), 4.13 – 4.01 (m, 2H), 2.75 (s, 3H), 1.61 – 1.52 (m, 2H), 1.34 – 1.24 (m, 2H), 0.88 (t,  $J = 7.2$  Hz, 3H). **<sup>13</sup>C NMR** (100 MHz, CDCl<sub>3</sub>)  $\delta$  166.4, 143.3, 141.1, 137.0, 134.4, 134.3, 132.1, 131.6, 130.6, 130.3, 129.6, 129.4, 128.5, 128.0, 127.6, 127.4, 125.6, 123.2, 123.1, 121.0, 121.0, 64.2, 30.5, 19.1, 18.8, 13.7. **HRMS** (ESI): exact mass calcd for C<sub>27</sub>H<sub>26</sub>NO<sub>3</sub><sup>+</sup> (M+H)<sup>+</sup> requires  $m/z$  412.1907, found  $m/z$  412.1908.

**(S)-1-(4-methoxynaphthalen-1-yl)isoquinoline-N-oxide ((S)-1f)**<sup>1</sup>

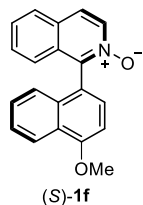

Foamy solid, 13.5 mg, 45% yield, 86% ee. **HPLC** CHIRALCEL OD-H, *n*-hexane/2-propanol = 70/30, flow rate = 1.0 mL/min,  $\lambda = 256$  nm, retention time: 14.402 min, 23.650 min.  $[\alpha]_D^{25} = +200.24$  ( $c = 0.276$ , CH<sub>2</sub>Cl<sub>2</sub>).

**(S)-1-(2-(3-butoxy-3-oxoprop-1-en-1-yl)-4-methoxy-naphthalen-1-yl)isoquinoline-N-oxide**

**(3fa)**

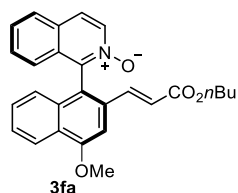

Foamy solid, 19.8 mg, 46% yield, m.p.: 227.6-228.8 °C, 91% ee.  $R_f = 0.52$  (EtOAc/MeOH, 50/1, v/v). **HPLC** CHIRALCEL IA, *n*-hexane/2-propanol = 70/30, flow rate = 0.8 mL/min,  $\lambda = 250$  nm, retention time: 12.457 min, 16.007 min.  $[\alpha]_D^{25} = -122.56$  ( $c = 0.328$ , CH<sub>2</sub>Cl<sub>2</sub>). **<sup>1</sup>H NMR** (600 MHz,

CDCl<sub>3</sub>)  $\delta$  8.37 (d,  $J = 7.2$  Hz, 1H), 8.35 (d,  $J = 8.4$  Hz, 1H), 7.86 (d,  $J = 8.4$  Hz, 1H), 7.81 (d,  $J = 7.2$  Hz, 1H), 7.56 – 7.46 (m, 2H), 7.40 – 7.31 (m, 2H), 7.23 (d,  $J = 16.2$  Hz, 1H), 7.19 (s, 1H), 7.08 – 7.01 (m, 2H), 6.50 (d,  $J = 16.2$  Hz, 1H), 4.11 (s, 3H), 4.08 – 3.99 (m, 2H), 1.56 – 1.48 (m, 2H), 1.29 – 1.19 (m, 2H), 0.85 (t,  $J = 7.2$  Hz, 3H). **<sup>13</sup>C NMR** (150 MHz, CDCl<sub>3</sub>)  $\delta$  166.4, 156.9, 143.4, 141.6, 137.7, 132.5, 130.8, 129.7, 128.6, 128.5, 128.2, 127.1, 127.1, 126.9, 125.4, 125.1, 124.2, 122.8, 122.8, 120.7, 100.6, 64.3, 55.8, 30.6, 19.1, 13.7. **HRMS** (ESI): exact mass calcd for C<sub>27</sub>H<sub>26</sub>NO<sub>4</sub><sup>+</sup> (M+H)<sup>+</sup> requires m/z 428.1856, found m/z 428.1852.

**(S)-1-(4-methylnaphthalen-1-yl)isoquinoline-N-oxide ((S)-1g) <sup>1</sup>**

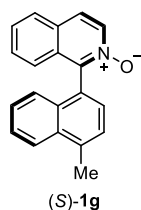

Foamy solid, 11.3 mg, 40% yield, 96% ee. **HPLC** CHIRALCEL AD, *n*-hexane/2-propanol = 70/30, flow rate = 1.0 mL/min,  $\lambda = 256$  nm, retention time: 7.667 min, 16.903 min.  $[\alpha]_D^{25} = +356.46$  (c = 0.222, CH<sub>2</sub>Cl<sub>2</sub>).

**(S)-1-(2-(3-butoxy-3-oxoprop-1-en-1-yl)-4-methyl-naphthalen-1-yl)isoquinoline-N-oxide (3ga)**

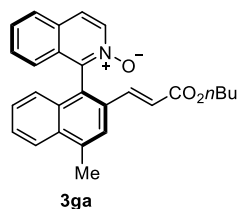

Foamy solid, 19.6 mg, 48% yield, m.p.: 192.7-194.3 °C, 87% ee.  $R_f = 0.52$  (EtOAc/MeOH, 50/1, v/v). **HPLC** CHIRALCEL IA, *n*-hexane/2-propanol = 70/30, flow rate = 0.8 mL/min,  $\lambda = 250$  nm, retention time: 17.573 min, 25.713 min.  $[\alpha]_D^{25} = -102.37$  (c = 0.394, CH<sub>2</sub>Cl<sub>2</sub>). **<sup>1</sup>H NMR** (600 MHz, CDCl<sub>3</sub>)  $\delta$  8.38 (d,  $J = 7.2$  Hz, 1H), 8.07 (d,  $J = 8.4$  Hz, 1H), 7.86 (d,  $J = 7.8$  Hz, 1H), 7.82 (d,  $J = 7.2$  Hz, 1H), 7.78 (s, 1H), 7.57 – 7.50 (m, 2H), 7.38 – 7.31 (m, 2H), 7.22 (d,  $J = 15.6$  Hz, 1H), 7.12 (d,  $J = 8.4$  Hz, 1H), 7.00 (d,  $J = 8.4$  Hz, 1H), 6.53 (d,  $J = 15.6$  Hz, 1H), 4.08 – 3.98 (m, 2H), 2.81 (s, 3H), 1.57 – 1.48 (m, 2H), 1.30 – 1.20 (m, 2H), 0.85 (t,  $J = 7.2$  Hz, 3H). **<sup>13</sup>C NMR** (150 MHz, CDCl<sub>3</sub>)  $\delta$  166.5, 143.4, 141.2, 137.6, 137.0, 133.8, 131.7, 131.6, 130.5, 129.7, 128.6, 128.4, 127.4, 127.4, 127.1, 126.2, 125.0, 124.8, 124.3, 123.8, 120.9, 64.3, 30.6, 19.9, 19.1, 13.7. **HRMS** (ESI): exact mass calcd for C<sub>27</sub>H<sub>25</sub>NNaO<sub>3</sub><sup>+</sup> (M+Na)<sup>+</sup> requires m/z 434.1727, found m/z 434.1723.

**(S)-1-(4-fluoronaphthalen-1-yl)isoquinoline-N-oxide ((S)-1h) <sup>1</sup>**

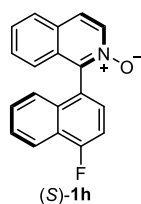

Foamy solid, 13.9 mg, 48% yield, 82% ee. **HPLC** CHIRALCEL AD-H, *n*-hexane/2-propanol = 70/30, flow rate = 1.0 mL/min,  $\lambda = 256$  nm, retention time: 7.783 min, 10.088 min.  $[\alpha]_{\text{D}}^{25} = +276.97$  (c = 0.246, CH<sub>2</sub>Cl<sub>2</sub>).

**(S)-1-(2-(3-butoxy-3-oxoprop-1-en-1-yl)-4-fluoro-naphthalen-1-yl)isoquinoline-N-oxide (3ha)**

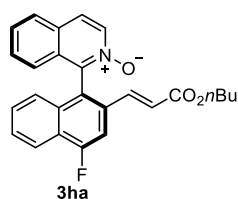

Foamy solid, 17.4 mg, 42% yield, m.p.: 180.2-181.6 °C, 94% ee.  $R_f = 0.48$  (EtOAc/MeOH, 50/1, v/v). **HPLC** CHIRALCEL AD, *n*-hexane/2-propanol = 80/20, flow rate = 1.0 mL/min,  $\lambda = 256$  nm, retention time: 21.347 min, 31.317 min.  $[\alpha]_{\text{D}}^{25} = -102.76$  (c = 0.242, CH<sub>2</sub>Cl<sub>2</sub>). **<sup>1</sup>H NMR** (600 MHz, CDCl<sub>3</sub>)  $\delta$  8.38 (d,  $J = 7.2$  Hz, 1H), 8.20 (d,  $J = 7.8$  Hz, 1H), 7.89 (d,  $J = 8.4$  Hz, 1H), 7.85 (d,  $J = 7.2$  Hz, 1H), 7.62 – 7.54 (m, 3H), 7.40 (t,  $J = 7.2$  Hz, 2H), 7.18 (d,  $J = 16.2$  Hz, 1H), 7.11 (d,  $J = 9.0$  Hz, 1H), 7.00 (d,  $J = 8.4$  Hz, 1H), 6.47 (d,  $J = 15.6$  Hz, 1H), 4.08 – 3.99 (m, 2H), 1.59 – 1.48 (m, 2H), 1.30 – 1.20 (m, 2H), 0.86 (t,  $J = 7.2$  Hz, 3H). **<sup>13</sup>C NMR** (150 MHz, CDCl<sub>3</sub>)  $\delta$  166.2, 160.0, (d,  $J = 253.5$  Hz), 142.5, 140.3, 137.7, 133.3 (d,  $J = 6.0$  Hz), 133.0 (d,  $J = 9.0$  Hz), 130.5, 130.0, 128.8 (d,  $J = 9.0$  Hz), 128.7, 127.9, 127.3, 126.1 (d,  $J = 3.0$  Hz), 125.7 (d,  $J = 1.5$  Hz), 125.2, 125.0, 124.9, 124.6, 121.9, 121.5 (d,  $J = 4.5$  Hz), 106.8 (d,  $J = 22.5$  Hz), 64.5, 30.6, 19.2, 13.8. **<sup>19</sup>F NMR** (565 MHz, CDCl<sub>3</sub>)  $\delta$  -119.9. **HRMS** (ESI): exact mass calcd for C<sub>26</sub>H<sub>22</sub>FNNaO<sub>3</sub><sup>+</sup> (M+Na)<sup>+</sup> requires m/z 438.1476, found m/z 438.1466.

**(S)-1-(6-methoxynaphthalen-1-yl)isoquinoline N-oxide ((S)-1i)**

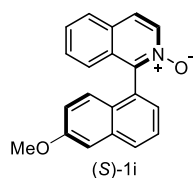

Foamy solid, 12.5 mg, 42% yield, 230.1-232.2 °C, 90% ee. **HPLC** CHIRALCEL OD-H, *n*-hexane/2-propanol = 70/30, flow rate = 1.0 mL/min,  $\lambda = 256$  nm, retention time: 15.247 min, 21.308



min.  $[\alpha]_D^{25} = +321.54$  ( $c = 0.164$ ,  $\text{CH}_2\text{Cl}_2$ ).

**(S)-1-(2-(3-butoxy-3-oxoprop-1-en-1-yl)-6-methoxynaphthalen-1-yl)isoquinoline N-oxide (3ia)**

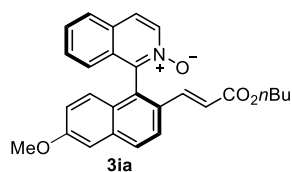

Foamy solid, 21.9 mg, 51% yield, m.p.: 184.0-185.6 °C, 80% ee.  $R_f = 0.20$  (EtOAc/MeOH, 50/1, v/v). **HPLC** CHIRALCEL IF, *n*-hexane/2-propanol = 60/40, flow rate = 1.0 mL/min,  $\lambda = 256$  nm, retention time: 37.968 min, 42.123 min.  $[\alpha]_D^{25} = -119.49$  ( $c = 0.342$ ,  $\text{CH}_2\text{Cl}_2$ ). **<sup>1</sup>H NMR** (400 MHz,  $\text{CDCl}_3$ )  $\delta$  8.37 (d,  $J = 7.2$  Hz, 1H), 8.04 (d,  $J = 8.8$  Hz, 1H), 7.96 – 7.86 (m, 2H), 7.73 (d,  $J = 7.2$  Hz, 1H), 7.51 (t,  $J = 8.0$  Hz, 1H), 7.39 – 7.30 (m, 1H), 7.26 – 7.15 (m, 2H), 7.12 (d,  $J = 8.4$  Hz, 1H), 7.02 (dd,  $J = 9.2, 2.4$  Hz, 1H), 6.88 (d,  $J = 9.2$  Hz, 1H), 6.51 (d,  $J = 15.6$  Hz, 1H), 4.10 – 3.98 (m, 2H), 3.93 (s, 3H), 1.59 – 1.48 (m, 2H), 1.33 – 1.19 (m, 2H), 0.87 (t,  $J = 7.2$  Hz, 3H). **<sup>13</sup>C NMR** (100 MHz,  $\text{CDCl}_3$ )  $\delta$  166.6, 160.0, 143.3, 141.3, 137.9, 134.5, 132.2, 131.7, 130.8, 130.5, 130.1, 128.6, 127.8, 127.6, 126.9, 125.8, 125.7, 123.3, 123.2, 122.4, 121.2, 105.8, 64.4, 55.8, 30.7, 19.2, 13.8. **HRMS** (ESI): exact mass calcd for  $\text{C}_{27}\text{H}_{26}\text{NO}_4^+$  ( $\text{M}+\text{H}$ )<sup>+</sup> requires  $m/z$  428.1856, found  $m/z$  428.1857.

**(S)-6-methyl-1-(4-methylnaphthalen-1-yl)isoquinoline-N-oxide ((S)-1j) <sup>1</sup>**

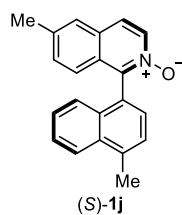

Foamy solid, 11.1 mg, 37% yield, 94% ee. **HPLC** CHIRALCEL AD, *n*-hexane/2-propanol = 70/30, flow rate = 1.0 mL/min,  $\lambda = 256$  nm, retention time: 7.212 min, 13.438 min.  $[\alpha]_D^{25} = +343.20$  ( $c = 0.196$ ,  $\text{CH}_2\text{Cl}_2$ ).

**(S)-1-(2-(3-butoxy-3-oxoprop-1-en-1-yl)-4-methyl-naphthalen-1-yl)-6-methyl-isoquinoline-N-oxide (3ja)**

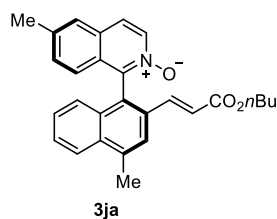

Foamy solid, 19.4 mg, 46% yield, m.p.: 190.4-191.8 °C, 81% ee.  $R_f = 0.42$  (EtOAc/MeOH, 50/1, v/v). **HPLC** CHIRALCEL IA, *n*-hexane/2-propanol = 70/30, flow rate = 1.0 mL/min,  $\lambda = 256$  nm, retention time: 11.520 min, 15.093 min.  $[\alpha]_D^{25} = -147.33$  ( $c = 0.362$ ,  $\text{CH}_2\text{Cl}_2$ ). **<sup>1</sup>H NMR** (600 MHz,  $\text{CDCl}_3$ )  $\delta$  8.35 (d,  $J = 7.2$  Hz, 1H), 8.07 (d,  $J = 8.4$  Hz, 1H), 7.77 (s, 1H), 7.73 (d,  $J = 7.2$  Hz, 1H), 7.64 (s, 1H), 7.54 (t,  $J = 7.8$  Hz, 1H), 7.33 (t,  $J = 7.2$  Hz, 1H), 7.24 – 7.16 (m, 2H), 7.13 (d,  $J = 8.4$  Hz, 1H), 6.90 (d,  $J = 9.0$  Hz, 1H), 6.52 (d,  $J = 15.6$  Hz, 1H), 4.08 – 3.99 (m, 2H), 2.80 (s, 3H), 2.46 (s, 3H), 1.57 – 1.49 (m, 2H), 1.30 – 1.21 (m, 2H), 0.86 (t,  $J = 7.2$  Hz, 3H). **<sup>13</sup>C NMR** (150 MHz,  $\text{CDCl}_3$ )  $\delta$  166.5, 143.3, 141.3, 139.1, 137.6, 136.9, 133.8, 131.9, 131.7, 131.6, 128.9, 128.7, 128.6, 127.4, 127.4, 126.3, 124.9, 124.8, 123.8, 123.7, 120.8, 64.3, 30.6, 21.7, 19.9, 19.1, 13.7. **HRMS** (ESI): exact mass calcd for  $\text{C}_{28}\text{H}_{28}\text{NO}_3^+$  ( $\text{M}+\text{H}$ )<sup>+</sup> requires  $m/z$  426.2064, found  $m/z$  426.2065.

**(S)-1-(4-fluoronaphthalen-1-yl)-6-methylisoquinoline-N-oxide ((S)-1k) <sup>1</sup>**

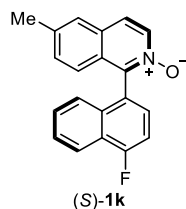

Foamy solid, 13.7 mg, 45% yield, 95% ee. **HPLC** CHIRALCEL AD, *n*-hexane/2-propanol = 70/30, flow rate = 1.0 mL/min,  $\lambda = 254$  nm, retention time: 7.263 min, 9.643 min.  $[\alpha]_D^{25} = +321.94$  ( $c = 0.234$ ,  $\text{CH}_2\text{Cl}_2$ ).

**(S)-1-(2-(3-butoxy-3-oxoprop-1-en-1-yl)-4-fluoro-naphthalen-1-yl)-6-methyl-isoquinoline-N-oxide (3ka)**

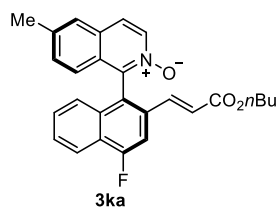

Foamy solid, 19.7 mg, 46% yield, m.p.: 169.6-171.2 °C, 92% ee.  $R_f = 0.44$  (EtOAc/MeOH, 50/1, v/v). **HPLC** CHIRALCEL AD, *n*-hexane/2-propanol = 70/30, flow rate = 1.0 mL/min,  $\lambda = 254$  nm,

retention time: 10.784 min, 14.906 min.  $[\alpha]_{\text{D}}^{25} = -172.12$  ( $c = 0.342$ ,  $\text{CH}_2\text{Cl}_2$ ).  $^1\text{H NMR}$  (600 MHz,  $\text{CDCl}_3$ )  $\delta$  8.35 (d,  $J = 7.2$  Hz, 1H), 8.19 (d,  $J = 8.4$  Hz, 1H), 7.76 (d,  $J = 7.2$  Hz, 1H), 7.67 (s, 1H), 7.61 – 7.55 (m, 2H), 7.43 – 7.37 (m, 1H), 7.25 – 7.21 (m, 2H), 7.20 – 7.15 (m, 1H), 7.11 (d,  $J = 8.4$  Hz, 1H), 6.89 (d,  $J = 8.4$  Hz, 1H), 6.46 (d,  $J = 15.6$  Hz, 1H), 4.11 – 3.97 (m, 2H), 2.49 (s, 3H), 1.57 – 1.49 (m, 2H), 1.30 – 1.20 (m, 2H), 0.86 (t,  $J = 7.2$  Hz, 3H).  $^{13}\text{C NMR}$  (150 MHz,  $\text{CDCl}_3$ )  $\delta$  166.3, 160.0, (d,  $J = 255.0$  Hz), 142.4, 140.4, 139.4, 137.7, 133.3 (d,  $J = 4.5$  Hz), 132.9 (d,  $J = 9.0$  Hz), 132.2, 129.0, 128.8 (d,  $J = 9.0$  Hz), 127.9, 126.5, 126.3 (d,  $J = 3.0$  Hz), 125.7 (d,  $J = 3.0$  Hz), 125.2, 125.1, 124.8, 124.0, 121.8, 121.4 (d,  $J = 4.5$  Hz), 106.9 (d,  $J = 21.0$  Hz), 64.5, 30.7, 21.8, 19.2, 13.8.  $^{19}\text{F NMR}$  (565 MHz,  $\text{CDCl}_3$ )  $\delta$  -120.0. **HRMS** (ESI): exact mass calcd for  $\text{C}_{27}\text{H}_{25}\text{FNO}_3^+$  ( $\text{M}+\text{H}$ )<sup>+</sup> requires  $m/z$  430.1813, found  $m/z$  430.1812.

**(S)-1-(4-fluoronaphthalen-1-yl)-6-methoxyisoquinoline-N-oxide ((S)-11)**

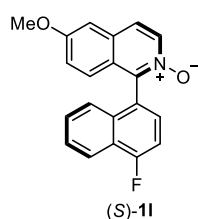

Foamy solid, 15.0 mg, 47% yield, m.p.: 270.3-272.0 °C, 91% ee. **HPLC** CHIRALCEL IA, *n*-hexane/2-propanol = 70/30, flow rate = 1.0 mL/min,  $\lambda = 256$  nm, retention time: 11.115 min, 16.447 min.  $[\alpha]_{\text{D}}^{25} = +277.21$  ( $c = 0.234$ ,  $\text{CH}_2\text{Cl}_2$ ).

**(S)-1-(2-(3-butoxy-3-oxoprop-1-en-1-yl)-4-fluoro-naphthalen-1-yl)-6-methoxy- isoquinoline-N-oxide (31a)**

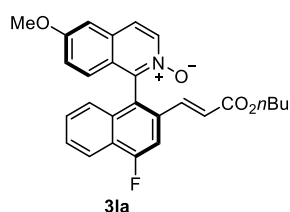

Foamy solid, 22.2 mg, 50% yield, m.p.: 208.0-209.7 °C, 90% ee.  $R_f = 0.18$  (EtOAc/MeOH, 50/1, v/v). **HPLC** CHIRALCEL IF, *n*-hexane/2-propanol = 60/40, flow rate = 1.0 mL/min,  $\lambda = 254$  nm, retention time: 26.871 min, 32.012 min.  $[\alpha]_{\text{D}}^{25} = -149.47$  ( $c = 0.380$ ,  $\text{CH}_2\text{Cl}_2$ ).  $^1\text{H NMR}$  (600 MHz,  $\text{CDCl}_3$ )  $\delta$  8.34 (d,  $J = 7.2$  Hz, 1H), 8.17 (d,  $J = 8.4$  Hz, 1H), 7.73 (d,  $J = 7.2$  Hz, 1H), 7.60 – 7.53 (m, 2H), 7.40 (t,  $J = 7.8$  Hz, 1H), 7.22 – 7.15 (m, 2H), 7.12 (d,  $J = 8.4$  Hz, 1H), 7.03 (dd,  $J = 9.0$ , 2.4 Hz, 1H), 6.89 (d,  $J = 9.0$  Hz, 1H), 6.46 (d,  $J = 15.6$  Hz, 1H), 4.08 – 3.99 (m, 2H), 3.91 (s, 3H),

1.58 – 1.48 (m, 2H), 1.31 – 1.21 (m, 2H), 0.86 (t,  $J = 7.2$  Hz, 3H).  $^{13}\text{C}$  NMR (150 MHz,  $\text{CDCl}_3$ )  $\delta$  166.2, 159.9 (d,  $J = 249.0$  Hz), 159.9, 142.3, 140.3, 137.9, 133.2 (d,  $J = 6.0$  Hz), 132.8 (d,  $J = 9.0$  Hz), 130.6, 128.8, 127.8, 126.5, 126.3 (d,  $J = 4.5$  Hz), 125.7 (d,  $J = 4.5$  Hz), 125.1, 124.9, 123.4, 122.4, 121.8, 121.3 (d,  $J = 4.5$  Hz), 106.8 (d,  $J = 22.5$  Hz), 105.8, 64.5, 55.7, 30.6, 19.1, 13.7.  $^{19}\text{F}$  NMR (565 MHz,  $\text{CDCl}_3$ )  $\delta$  -120.0. HRMS (ESI): exact mass calcd for  $\text{C}_{27}\text{H}_{25}\text{FNO}_4^+$  ( $\text{M}+\text{H}$ ) $^+$  requires  $m/z$  446.1762, found  $m/z$  446.1761.

**(S)-1-(naphthalen-1-yl)benzo[h]isoquinoline-N-oxide ((S)-1m)**

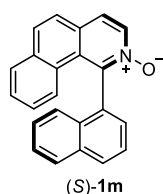

Foamy solid, 12.5 mg, 39% yield, m.p.: 134.4-136.6 °C, 99% ee. HPLC CHIRALCEL OD, *n*-hexane/2-propanol = 70/30, flow rate = 1.0 mL/min,  $\lambda = 250$  nm, retention time: 18.832 min, 23.914 min.  $[\alpha]_{\text{D}}^{25} = +195.16$  ( $c = 0.186$ ,  $\text{CH}_2\text{Cl}_2$ ).

**(S)-1-(2-(3-butoxy-3-oxoprop-1-en-1-yl)naphthalen-1-yl)benzo[h]isoquinoline-N-oxide (3ma)**

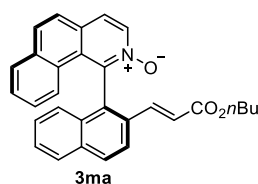

Foamy solid, 21.9 mg, 49% yield, m.p.: 104.0-105.7 °C, 73% ee.  $R_f = 0.40$  (EtOAc/MeOH, 50/1, v/v). HPLC CHIRALCEL IF, *n*-hexane/2-propanol = 60/40, flow rate = 1.0 mL/min,  $\lambda = 256$  nm, retention time: 35.249 min, 48.795 min.  $[\alpha]_{\text{D}}^{25} = -172.67$  ( $c = 0.322$ ,  $\text{CH}_2\text{Cl}_2$ ).  $^1\text{H}$  NMR (600 MHz,  $\text{CDCl}_3$ )  $\delta$  8.57 (d,  $J = 7.2$  Hz, 1H), 8.11 (d,  $J = 9.0$  Hz, 1H), 7.96 (dd,  $J = 9.0, 4.2$  Hz, 2H), 7.89 (d,  $J = 6.6$  Hz, 1H), 7.86 (d,  $J = 9.0$  Hz, 1H), 7.80 (d,  $J = 7.2$  Hz, 1H), 7.75 (d,  $J = 8.4$  Hz, 1H), 7.51 – 7.48 (m, 1H), 7.42 – 7.38 (m, 1H), 7.29 – 7.22 (m, 3H), 7.06 (d,  $J = 9.0$  Hz, 1H), 6.95 – 6.91 (m, 1H), 6.46 (d,  $J = 15.6$  Hz, 1H), 4.02 – 3.92 (m, 2H), 1.51 – 1.45 (m, 2H), 1.25 – 1.18 (m, 2H), 0.84 (t,  $J = 7.2$  Hz, 3H).  $^{13}\text{C}$  NMR (150 MHz,  $\text{CDCl}_3$ )  $\delta$  166.5, 144.1, 140.8, 137.7, 134.9, 134.3, 134.2, 131.3, 131.2, 131.1, 130.4, 129.6, 129.3, 128.8, 128.3, 128.0, 127.9, 127.8, 127.6, 127.5, 126.2, 125.1, 124.9, 124.9, 123.8, 121.1, 64.3, 30.7, 19.2, 13.8. HRMS (ESI): exact mass calcd for  $\text{C}_{30}\text{H}_{26}\text{NO}_3^+$  ( $\text{M}+\text{H}$ ) $^+$  requires  $m/z$  448.1907, found  $m/z$  448.1904.

**(S)-1-(pyren-1-yl)isoquinoline-N-oxide ((S)-1n)**

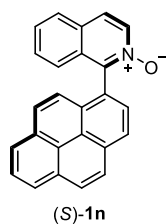

Foamy solid, 15.0 mg, 43% yield, m.p.: 239.9-242.6 °C, 94% ee. **HPLC** CHIRALCEL OD, *n*-hexane/2-propanol = 70/30, flow rate = 1.0 mL/min,  $\lambda$  = 256 nm, retention time: 21.883 min, 29.523 min.  $[\alpha]_D^{25} = +179.67$  (c = 0.200, CH<sub>2</sub>Cl<sub>2</sub>).

**(S)-1-(2-(3-butoxy-3-oxoprop-1-en-1-yl)pyren-1-yl)isoquinoline-N-oxide (3na)**

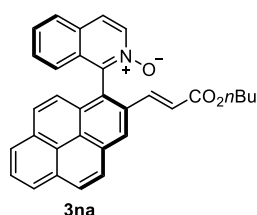

Foamy solid, 20.6 mg, 44% yield, m.p.: 184.0-185.8 °C, 89% ee.  $R_f$  = 0.42 (EtOAc/MeOH, 50/1, v/v). **HPLC** CHIRALCEL OD, *n*-hexane/2-propanol = 70/30, flow rate = 1.0 mL/min,  $\lambda$  = 256 nm, retention time: 28.265 min, 48.893 min.  $[\alpha]_D^{25} = +114.57$  (c = 0.302, CH<sub>2</sub>Cl<sub>2</sub>). **<sup>1</sup>H NMR** (400 MHz, CDCl<sub>3</sub>)  $\delta$  8.64 (s, 1H), 8.47 (d,  $J$  = 7.2 Hz, 1H), 8.22 (d,  $J$  = 7.6 Hz, 1H), 8.18 – 8.10 (m, 3H), 8.01 (t,  $J$  = 7.6 Hz, 1H), 7.98 – 7.86 (m, 3H), 7.59 – 7.47 (m, 2H), 7.38 – 7.28 (m, 2H), 6.92 (d,  $J$  = 8.4 Hz, 1H), 6.71 (d,  $J$  = 15.6 Hz, 1H), 4.15 – 4.02 (m, 2H), 1.63 – 1.51 (m, 2H), 1.33 – 1.26 (m, 2H), 0.89 (t,  $J$  = 7.2 Hz, 3H). **<sup>13</sup>C NMR** (100 MHz, CDCl<sub>3</sub>)  $\delta$  166.5, 143.8, 142.0, 137.8, 132.5, 132.1, 131.4, 131.1, 130.7, 130.3, 129.9, 129.4, 129.2, 128.7, 128.7, 127.4, 127.2, 126.9, 126.2, 126.1, 126.0, 125.8, 125.1, 124.5, 124.5, 124.4, 123.0, 121.7, 64.4, 30.7, 19.2, 13.8. **HRMS** (ESI): exact mass calcd for C<sub>32</sub>H<sub>26</sub>NO<sub>3</sub><sup>+</sup> (M+H)<sup>+</sup> requires m/z 472.1907, found m/z 472.1897.

**(S)-1-(2-(3-methoxy-3-oxoprop-1-en-1-yl)naphthalen-1-yl)isoquinoline-N-oxide (3ab)**

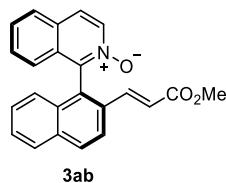

Foamy solid, 15.0 mg, 42% yield, m.p.: 176.2-177.9 °C, 91% ee.  $R_f$  = 0.30 (EtOAc/MeOH, 50/1, v/v). **HPLC** CHIRALCEL OD-H, *n*-hexane/2-propanol = 70/30, flow rate = 1.0 mL/min,  $\lambda$  = 256 nm, retention time: 32.407 min, 39.073 min.  $[\alpha]_D^{24} = -92.22$  (c = 0.300, CH<sub>2</sub>Cl<sub>2</sub>). **<sup>1</sup>H NMR** (400

MHz, CDCl<sub>3</sub>)  $\delta$  8.38 (d,  $J = 7.2$  Hz, 1H), 8.04 (d,  $J = 8.8$  Hz, 1H), 7.95 – 7.80 (m, 4H), 7.57 – 7.46 (m, 2H), 7.39 – 7.30 (m, 2H), 7.27 (d,  $J = 16.0$  Hz, 1H), 7.08 (d,  $J = 8.4$  Hz, 1H), 6.96 (d,  $J = 8.4$  Hz, 1H), 6.53 (d,  $J = 15.6$  Hz, 1H), 3.64 (s, 3H). <sup>13</sup>C NMR (100 MHz, CDCl<sub>3</sub>)  $\delta$  166.9, 143.1, 141.4, 137.6, 134.5, 132.2, 131.6, 130.5, 130.4, 130.0, 129.8, 128.7, 128.6, 128.6, 127.8, 127.6, 127.2, 125.7, 124.9, 124.5, 123.2, 120.8, 51.7. HRMS (ESI): exact mass calcd for C<sub>23</sub>H<sub>17</sub>NNaO<sub>3</sub><sup>+</sup> (M+Na)<sup>+</sup> requires m/z 378.1101, found m/z 378.1096.

**(S)-1-(2-(3-ethoxy-3-oxoprop-1-en-1-yl)naphthalen-1-yl)isoquinoline-N-oxide (3ac)**

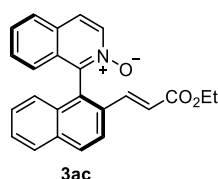

Foamy solid, 16.0 mg, 43% yield, m.p.: 223.6-225.2 °C, 92% ee. R<sub>f</sub> = 0.35 (EtOAc/MeOH, 50/1, v/v). HPLC CHIRALCEL IA, *n*-hexane/2-propanol = 70/30, flow rate = 1.0 mL/min,  $\lambda$  = 256 nm, retention time: 17.828 min, 20.520 min.  $[\alpha]_D^{24} = -89.79$  (c = 0.320, CH<sub>2</sub>Cl<sub>2</sub>). <sup>1</sup>H NMR (400 MHz, CDCl<sub>3</sub>)  $\delta$  8.38 (d,  $J = 7.2$  Hz, 1H), 8.04 (d,  $J = 8.8$  Hz, 1H), 7.95 – 7.89 (m, 2H), 7.85 (dd,  $J = 16.0, 7.2$  Hz, 2H), 7.57 – 7.46 (m, 2H), 7.39 – 7.30 (m, 2H), 7.26 (d,  $J = 16.0$  Hz, 1H), 7.10 (d,  $J = 8.4$  Hz, 1H), 6.96 (d,  $J = 8.4$  Hz, 1H), 6.53 (d,  $J = 16.0$  Hz, 1H), 4.10 (q,  $J = 7.2$  Hz, 2H), 1.19 (t,  $J = 7.2$  Hz, 3H). <sup>13</sup>C NMR (100 MHz, CDCl<sub>3</sub>)  $\delta$  166.4, 143.2, 141.2, 137.6, 134.4, 132.2, 131.6, 130.4, 130.4, 129.9, 129.8, 128.6, 128.6, 128.6, 127.8, 127.5, 127.2, 125.6, 124.9, 124.5, 123.2, 121.2, 60.5, 14.2. HRMS (ESI): exact mass calcd for C<sub>24</sub>H<sub>19</sub>NNaO<sub>3</sub><sup>+</sup> (M+Na)<sup>+</sup> requires m/z 392.1257, found m/z 392.1257.

**(S)-1-(2-(3-isopropoxy-3-oxoprop-1-en-1-yl)naphthalen-1-yl)isoquinoline-N-oxide (3ad)**

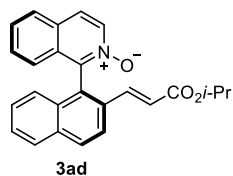

Foamy solid, 16.4 mg, 43% yield, m.p.: 194.4-197.3 °C, 91% ee. R<sub>f</sub> = 0.40 (EtOAc/MeOH, 50/1, v/v). HPLC CHIRALCEL IA, *n*-hexane/2-propanol = 70/30, flow rate = 1.0 mL/min,  $\lambda$  = 256 nm, retention time: 12.130 min, 15.125 min.  $[\alpha]_D^{25} = -92.88$  (c = 0.328, CH<sub>2</sub>Cl<sub>2</sub>). <sup>1</sup>H NMR (600 MHz, CDCl<sub>3</sub>)  $\delta$  8.38 (d,  $J = 6.6$  Hz, 1H), 8.04 (d,  $J = 8.4$  Hz, 1H), 7.93 (dd,  $J = 8.4, 4.2$  Hz, 2H), 7.88 (d,  $J = 8.4$  Hz, 1H), 7.83 (d,  $J = 7.2$  Hz, 1H), 7.56 – 7.48 (m, 2H), 7.39 – 7.31 (m, 2H), 7.23 (d,  $J = 15.6$

Hz, 1H), 7.10 (d,  $J = 8.4$  Hz, 1H), 6.97 (d,  $J = 8.4$  Hz, 1H), 6.51 (d,  $J = 16.2$  Hz, 1H), 4.99 – 4.91 (m, 1H), 1.17 (dd,  $J = 10.2, 6.6$  Hz, 6H).  $^{13}\text{C NMR}$  (150 MHz,  $\text{CDCl}_3$ )  $\delta$  166.0, 143.3, 141.0, 137.7, 134.5, 132.3, 131.7, 130.4, 130.4, 129.9, 129.8, 128.7, 128.7, 128.6, 127.8, 127.5, 127.2, 125.7, 125.0, 124.4, 123.3, 121.7, 67.9, 21.9. **HRMS** (ESI): exact mass calcd for  $\text{C}_{25}\text{H}_{22}\text{NO}_3^+$  ( $\text{M}+\text{H}$ )<sup>+</sup> requires  $m/z$  384.1594, found  $m/z$  384.1585.

**(S)-1-(2-(3-oxo-3-phenoxyprop-1-en-1-yl)naphthalen-1-yl)isoquinoline-N-oxide (3ae)**

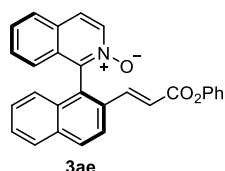

Foamy solid, 15.4 mg, 37% yield, m.p.: 238.8-240.2 °C, 89% ee.  $R_f = 0.48$  (EtOAc/MeOH, 50/1, v/v). **HPLC** CHIRALCEL IF, *n*-hexane/2-propanol = 50/50, flow rate = 1.0 mL/min,  $\lambda = 256$  nm, retention time: 30.132 min, 34.907 min.  $[\alpha]_{\text{D}}^{25} = -99.35$  ( $c = 0.308$ ,  $\text{CH}_2\text{Cl}_2$ ).  $^1\text{H NMR}$  (400 MHz,  $\text{CDCl}_3$ )  $\delta$  8.39 (d,  $J = 7.2$  Hz, 1H), 8.10 (d,  $J = 8.8$  Hz, 1H), 7.98 (dd,  $J = 14.4, 8.8$  Hz, 2H), 7.89 (d,  $J = 8.0$  Hz, 1H), 7.84 (d,  $J = 7.2$  Hz, 1H), 7.55 (q,  $J = 7.2$  Hz, 2H), 7.45 – 7.29 (m, 5H), 7.19 (t,  $J = 7.6$  Hz, 1H), 7.13 (d,  $J = 8.8$  Hz, 1H), 7.08 – 6.96 (m, 3H), 6.74 (d,  $J = 16.0$  Hz, 1H).  $^{13}\text{C NMR}$  (100 MHz,  $\text{CDCl}_3$ )  $\delta$  165.0, 150.8, 143.1, 143.1, 137.7, 134.7, 132.0, 131.7, 130.6, 130.5, 130.4, 129.9, 129.4, 128.8, 128.7, 128.0, 127.8, 127.3, 125.8, 125.8, 124.9, 124.6, 123.3, 121.6, 120.2. **HRMS** (ESI): exact mass calcd for  $\text{C}_{28}\text{H}_{19}\text{NNaO}_3^+$  ( $\text{M}+\text{Na}$ )<sup>+</sup> requires  $m/z$  440.1257, found  $m/z$  440.1257.

**(S)-1-(2-(3-(benzyloxy)-3-oxoprop-1-en-1-yl)naphthalen-1-yl)isoquinoline-N-oxide (3af)**

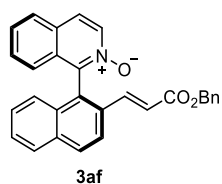

Foamy solid, 16.5 mg, 38% yield, m.p.: 197.2-198.8 °C, 91% ee.  $R_f = 0.44$  (EtOAc/MeOH, 50/1, v/v). **HPLC** CHIRALCEL OD-H, *n*-hexane/2-propanol = 60/40, flow rate = 1.0 mL/min,  $\lambda = 256$  nm, retention time: 28.785 min, 35.675 min.  $[\alpha]_{\text{D}}^{25} = -82.02$  ( $c = 0.330$ ,  $\text{CH}_2\text{Cl}_2$ ).  $^1\text{H NMR}$  (600 MHz,  $\text{CDCl}_3$ )  $\delta$  8.38 (d,  $J = 7.2$  Hz, 1H), 8.05 (d,  $J = 9.0$  Hz, 1H), 7.93 (t,  $J = 9.0$  Hz, 2H), 7.89 (d,  $J = 8.4$  Hz, 1H), 7.83 (d,  $J = 7.2$  Hz, 1H), 7.56 (t,  $J = 7.2$  Hz, 1H), 7.52 (t,  $J = 7.2$  Hz, 1H), 7.41 – 7.28 (m, 6H), 7.24 (d,  $J = 7.2$  Hz, 2H), 7.12 (d,  $J = 8.4$  Hz, 1H), 6.98 (d,  $J = 9.0$  Hz, 1H), 6.59 (d,  $J = 16.0$  Hz, 1H).

= 15.6 Hz, 1H), 5.14 – 5.05 (m, 2H).  $^{13}\text{C}$  NMR (150 MHz,  $\text{CDCl}_3$ )  $\delta$  166.2, 143.2, 141.8, 137.7, 136.0, 134.6, 132.1, 131.7, 130.5, 130.4, 130.2, 129.9, 128.7, 128.6, 128.6, 128.2, 128.0, 127.9, 127.6, 127.2, 125.7, 125.0, 124.5, 123.2, 120.7, 66.3. **HRMS** (ESI): exact mass calcd for  $\text{C}_{29}\text{H}_{21}\text{NNaO}_3^+$  ( $\text{M}+\text{Na}$ ) $^+$  requires  $m/z$  454.1414, found  $m/z$  454.1409.

**(S)-1-(2-(2-(phenylsulfonyl)vinyl)naphthalen-1-yl)isoquinoline-N-oxide (3ag)**

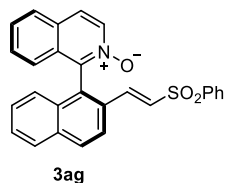

Foamy solid, 11.4 mg, 26% yield, m.p.: 108.3-110.7 °C, 97% ee.  $R_f$  = 0.33 (EtOAc/MeOH, 50/1, v/v). **HPLC** CHIRALCEL IA, *n*-hexane/2-propanol = 60/40, flow rate = 1.0 mL/min,  $\lambda$  = 256 nm, retention time: 15.085 min, 20.340 min.  $[\alpha]_{\text{D}}^{25}$  = -91.82 ( $c$  = 0.228,  $\text{CH}_2\text{Cl}_2$ ).  $^1\text{H}$  NMR (600 MHz,  $\text{CDCl}_3$ )  $\delta$  8.36 (d,  $J$  = 7.2 Hz, 1H), 8.03 (d,  $J$  = 9.0 Hz, 1H), 7.91 (dd,  $J$  = 18.6, 8.4 Hz, 2H), 7.83 (d,  $J$  = 7.2 Hz, 1H), 7.75 (d,  $J$  = 9.0 Hz, 1H), 7.68 (d,  $J$  = 7.8 Hz, 2H), 7.61 – 7.50 (m, 3H), 7.43 (t,  $J$  = 7.8 Hz, 2H), 7.40 – 7.34 (m, 2H), 7.23 (d,  $J$  = 15.6 Hz, 1H), 7.13 (d,  $J$  = 8.4 Hz, 1H), 6.91 – 6.86 (m, 2H).  $^{13}\text{C}$  NMR (150 MHz,  $\text{CDCl}_3$ )  $\delta$  142.6, 140.1, 139.6, 137.6, 134.7, 133.4, 131.6, 130.7, 130.7, 130.5, 130.3, 130.3, 130.0, 129.3, 128.8, 128.7, 128.6, 128.1, 128.1, 127.8, 127.4, 125.9, 124.8, 123.4. **HRMS** (ESI): exact mass calcd for  $\text{C}_{27}\text{H}_{19}\text{NNaO}_3\text{S}^+$  ( $\text{M}+\text{Na}$ ) $^+$  requires  $m/z$  460.0978, found  $m/z$  460.0968.

**(S)-1-(2-(2-(chlorostyryl)naphthalen-1-yl)isoquinoline-N-oxide (3ah)**

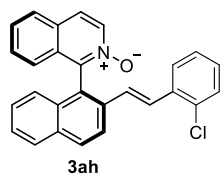

Foamy solid, 15.8 mg, 39% yield, m.p.: 196.2-198.1 °C, 93% ee.  $R_f$  = 0.46 (EtOAc/MeOH, 50/1, v/v). **HPLC** CHIRALCEL OD-H, *n*-hexane/2-propanol = 70/30, flow rate = 1.0 mL/min,  $\lambda$  = 256 nm, retention time: 15.553 min, 24.103 min.  $[\alpha]_{\text{D}}^{25}$  = -92.62 ( $c$  = 0.231,  $\text{CH}_2\text{Cl}_2$ ).  $^1\text{H}$  NMR (400 MHz,  $\text{CDCl}_3$ )  $\delta$  8.44 (d,  $J$  = 7.2 Hz, 1H), 8.07 (s, 2H), 7.96 – 7.82 (m, 3H), 7.62 – 7.52 (m, 2H), 7.50 – 7.44 (m, 1H), 7.41 – 7.36 (m, 1H), 7.35 – 7.27 (m, 2H), 7.20 – 7.16 (m, 1H), 7.13 – 7.00 (m, 4H), 6.66 (d,  $J$  = 16.4 Hz, 1H).  $^{13}\text{C}$  NMR (100 MHz,  $\text{CDCl}_3$ )  $\delta$  144.5, 137.7, 135.2, 134.8, 133.7, 133.6, 131.9, 130.5, 130.4, 129.8, 129.8, 128.9, 128.8, 128.6, 128.3, 128.0, 127.6, 127.2, 127.1,



126.9, 126.8, 126.6, 125.5, 125.2, 124.2, 123.6. **HRMS** (ESI): exact mass calcd for  $C_{27}H_{18}ClNNaO^+$  ( $M+Na$ )<sup>+</sup> requires  $m/z$  430.0969, found  $m/z$  430.0962.

**1-((S)-2-((E)-3-(((8R,9S,13S,14S)-13-methyl-17-oxo-7,8,9,11,12,13,14,15,16,17-decahydro-6H-cyclopenta[a]phenanthren-3-yl)oxy)-3-oxoprop-1-en-1-yl)naphthalen-1-yl) isoquinoline-N-oxide (3ai)**

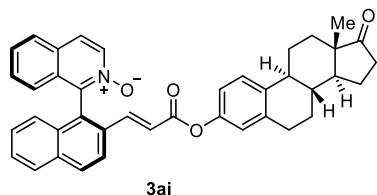

Foamy solid, 27.9 mg, 47% yield, m.p.: 165.9-167.8 °C, 90% de.  $R_f$  = 0.44 (EtOAc/MeOH, 50/1, v/v). **HPLC** CHIRALCEL AD, *n*-hexane/2-propanol = 60/40, flow rate = 1.0 mL/min,  $\lambda$  = 256 nm, retention time: 34.095 min, 45.887 min.  $[\alpha]_D^{21}$  = +15.41 ( $c$  = 0.558,  $CH_2Cl_2$ ). **<sup>1</sup>H NMR** (600 MHz,  $CDCl_3$ )  $\delta$  8.37 (d,  $J$  = 7.2 Hz, 1H), 8.08 (d,  $J$  = 8.4 Hz, 1H), 7.97 (dd,  $J$  = 21.0, 8.4 Hz, 2H), 7.87 (d,  $J$  = 8.4 Hz, 1H), 7.82 (d,  $J$  = 7.2 Hz, 1H), 7.53 (q,  $J$  = 7.8 Hz, 2H), 7.44 – 7.33 (m, 3H), 7.24 (d,  $J$  = 8.4 Hz, 1H), 7.13 (d,  $J$  = 8.4 Hz, 1H), 7.00 (d,  $J$  = 8.4 Hz, 1H), 6.82 – 6.76 (m, 2H), 6.73 (d,  $J$  = 15.6 Hz, 1H), 2.91 – 2.82 (m, 2H), 2.49 (dd,  $J$  = 19.2, 8.4 Hz, 1H), 2.41 – 2.35 (m, 1H), 2.29 – 2.22 (m, 1H), 2.17 – 2.09 (m, 1H), 2.06 – 1.93 (m, 3H), 1.64 – 1.39 (m, 6H), 0.89 (s, 3H). **<sup>13</sup>C NMR** (150 MHz,  $CDCl_3$ )  $\delta$  165.1, 148.6, 143.0, 142.9, 137.9, 137.6, 137.3, 134.6, 131.9, 131.6, 130.6, 130.4, 130.3, 129.9, 128.7, 128.6, 128.6, 127.9, 127.8, 127.2, 126.3, 125.7, 124.8, 124.5, 123.2, 121.6, 120.2, 118.7, 50.4, 48.0, 44.2, 38.0, 35.9, 31.6, 29.4, 26.3, 25.8, 21.6, 13.9. **HRMS** (ESI): exact mass calcd for  $C_{40}H_{35}NNaO_4^+$  ( $M+Na$ )<sup>+</sup> requires  $m/z$  616.2458, found  $m/z$  616.2452.

**1-((S)-2-((E)-3-(4-((S)-2-((tert-butoxycarbonyl)amino)-3-methoxy-3-oxopropyl)phenoxy)-3-oxoprop-1-en-1-yl)naphthalen-1-yl)isoquinoline-N-oxide (3aj)**

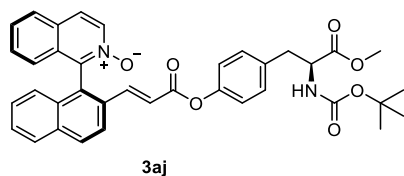

Foamy solid, 27.1 mg, 44% yield, m.p.: 110.3-112.4 °C, 93% de.  $R_f$  = 0.49 (EtOAc/MeOH, 50/1, v/v). **HPLC** CHIRALCEL IA, *n*-hexane/2-propanol = 60/40, flow rate = 1.0 mL/min,  $\lambda$  = 256 nm, retention time: 17.260 min, 28.822 min.  $[\alpha]_D^{21}$  = -40.21 ( $c$  = 0.542,  $CH_2Cl_2$ ). **<sup>1</sup>H NMR** (600 MHz,  $CDCl_3$ )  $\delta$  8.37 (d,  $J$  = 6.6 Hz, 1H), 8.07 (d,  $J$  = 8.4 Hz, 1H), 7.96 (dd,  $J$  = 23.4, 6.0 Hz, 2H), 7.84 (d,

$J = 22.8, 7.2$  Hz, 2H), 7.52 (q,  $J = 8.4$  Hz, 2H), 7.43 – 7.31 (m, 3H), 7.10 (dd,  $J = 25.8, 8.4$  Hz, 3H), 6.97 (dd,  $J = 19.2, 8.4$  Hz, 3H), 6.71 (d,  $J = 15.6$  Hz, 1H), 5.05 (d,  $J = 7.8$  Hz, 1H), 4.61 – 4.48 (m, 1H), 3.67 (s, 3H), 3.12 – 2.94 (m, 2H), 1.41 (s, 9H).  $^{13}\text{C}$  NMR (150 MHz,  $\text{CDCl}_3$ )  $\delta$  172.2, 164.8, 155.1, 149.7, 143.0, 142.9, 137.6, 134.6, 133.6, 131.8, 131.6, 130.5, 130.5, 130.3, 130.1, 129.8, 128.7, 128.6, 128.6, 127.8, 127.7, 127.2, 125.7, 124.8, 124.5, 123.1, 121.6, 120.0, 79.9, 54.4, 52.2, 37.6, 28.3. **HRMS** (ESI): exact mass calcd for  $\text{C}_{37}\text{H}_{34}\text{N}_2\text{NaO}_7^+$  ( $\text{M}+\text{Na}$ ) $^+$  requires  $m/z$  641.2258, found  $m/z$  641.2253.

**(*R*)-1-(2-iodonaphthalen-1-yl)isoquinoline-*N*-oxide (4a)**<sup>1</sup>

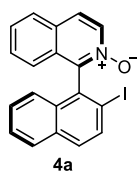

Foamy solid, 194.5 mg, 70% yield, 95% ee.  $R_f = 0.23$  (EtOAc/MeOH, 50/1, v/v). **HPLC** CHIRALCEL AY-RH, *n*-hexane/2-propanol = 60/40, flow rate = 1.0 mL/min,  $\lambda = 256$  nm, retention time: 14.747 min, 16.750 min.  $[\alpha]_{\text{D}}^{24} = -12.67$  ( $c = 0.1$ ,  $\text{CH}_2\text{Cl}_2$ ).  $^1\text{H}$  NMR (600 MHz,  $\text{CDCl}_3$ )  $\delta$  9.74 (s, 1H), 8.39 (d,  $J = 7.2$  Hz, 1H), 8.17 (q,  $J = 8.4$  Hz, 1H), 8.01 (d,  $J = 8.4$  Hz, 1H), 7.90 (dd,  $J = 19.2, 8.4$  Hz, 2H), 7.64 (t,  $J = 7.8$  Hz, 1H), 7.58 (t,  $J = 7.8$  Hz, 1H), 7.44 – 7.37 (m, 2H), 7.27 (d,  $J = 9.0$  Hz, 1H), 6.96 (d,  $J = 8.4$  Hz, 1H).  $^{13}\text{C}$  NMR (150 MHz,  $\text{CDCl}_3$ )  $\delta$  146.9, 137.5, 135.5, 134.3, 133.0, 132.8, 131.0, 129.7, 129.4, 128.8, 128.6, 128.6, 127.9, 127.1, 126.9, 125.1, 124.7, 124.3, 98.2. **HRMS** (ESI): exact mass calcd for  $\text{C}_{19}\text{H}_{12}\text{INNaO}^+$  ( $\text{M}+\text{Na}$ ) $^+$  requires  $m/z$  419.9856, found  $m/z$  419.9855.

**(*R*)-1-(2-(diphenylphosphanyl)naphthalen-1-yl)isoquinoline ((*R*)-QUINAP)**<sup>3</sup>

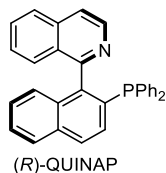

White solid, 31.6 mg, 72% yield, 92% ee.  $R_f = 0.34$  (Pet/EtOAc, 4/1, v/v). **HPLC** CHIRALCEL ID, *n*-hexane/2-propanol = 85/15, flow rate = 1.0 mL/min,  $\lambda = 230$  nm, retention time: 12.103 min, 16.355 min.  $[\alpha]_{\text{D}}^{24} = +122.6$  ( $c = 0.108$ ,  $\text{CH}_2\text{Cl}_2$ ).  $^1\text{H}$  NMR (600 MHz,  $\text{CDCl}_3$ )  $\delta$  8.63 (d,  $J = 6.0$  Hz, 1H), 7.88 (t,  $J = 8.4$  Hz, 3H), 8.73 (d,  $J = 5.4$  Hz, 1H), 7.61 – 7.57 (m, 1H), 7.48 – 7.42 (m, 2H), 7.30 – 7.14 (m, 13H), 7.10 (d,  $J = 8.4$  Hz, 1H).  $^{13}\text{C}$  NMR (150 MHz,  $\text{CDCl}_3$ )  $\delta$  160.6 (d,  $J = 7.5$

Hz), 144.4 (d,  $J = 33.0$  Hz), 142.4, 137.5 (d,  $J = 12.0$  Hz), 137.4 (d,  $J = 10.5$  Hz), 136.0, 134.9 (d,  $J = 13.5$  Hz), 133.9, 133.7 (d,  $J = 6.0$  Hz), 133.4, 133.2, 132.8 (d,  $J = 7.5$  Hz), 130.1 (d,  $J = 4.5$  Hz), 129.1 (d,  $J = 3.0$  Hz), 128.8, 128.5, 128.4, 128.3, 128.2, 128.0, 127.5, 127.1, 127.0 (d,  $J = 1.5$  Hz), 126.7, 120.4.  $^{31}\text{P}$  NMR (243 MHz,  $\text{CDCl}_3$ )  $\delta$  14.1. HRMS (ESI): exact mass calcd for  $\text{C}_{31}\text{H}_{23}\text{NP}^+$  ( $\text{M}+\text{H}$ ) $^+$  requires  $m/z$  440.1563, found  $m/z$  440.1560.

**(S)-1-(2-formylnaphthalen-1-yl)isoquinoline-N-oxide (4aa)**

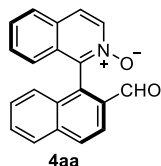

Foamy solid, 51.4 mg, 86% yield, m.p.: 157.6-160.2 °C, 92% ee.  $R_f = 0.2$  (EtOAc/MeOH, 50/1, v/v). HPLC CHIRALCEL OD-H, *n*-hexane/2-propanol = 50/50, flow rate = 1.0 mL/min,  $\lambda = 256$  nm, retention time: 12.047 min, 27.918 min.  $[\alpha]_D^{24} = +52.86$  ( $c = 0.396$ ,  $\text{CH}_2\text{Cl}_2$ ).  $^1\text{H}$  NMR (600 MHz,  $\text{CDCl}_3$ )  $\delta$  9.74 (s, 1H), 8.39 (d,  $J = 7.2$  Hz, 1H), 8.17 (q,  $J = 8.4$  Hz, 2H), 8.01 (d,  $J = 8.4$  Hz, 1H), 7.90 (dd,  $J = 19.8, 8.4$  Hz, 2H), 7.64 (t,  $J = 7.8$  Hz, 1H), 7.58 (t,  $J = 7.8$  Hz, 1H), 7.44 – 7.37 (m, 2H), 7.27 (d,  $J = 9.0$  Hz, 1H), 6.96 (d,  $J = 8.4$  Hz, 1H).  $^{13}\text{C}$  NMR (150 MHz,  $\text{CDCl}_3$ )  $\delta$  190.6, 141.9, 137.6, 136.7, 134.3, 132.8, 131.3, 130.9, 130.8, 130.1, 129.4, 128.9, 128.9, 128.6, 128.2, 127.3, 126.1, 124.7, 124.7, 123.7. HRMS (ESI): exact mass calcd for  $\text{C}_{20}\text{H}_{14}\text{NO}_2^+$  ( $\text{M}+\text{H}$ ) $^+$  requires  $m/z$  300.1019, found  $m/z$  300.1013.

**(S)-1-(2-(hydroxymethyl)naphthalen-1-yl)isoquinoline-N-oxide (5aa)**

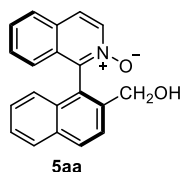

Foamy solid, 29.2 mg, 97% yield, m.p.: 198.8-200.9 °C, 92% ee.  $R_f = 0.1$  (EtOAc/MeOH, 50/1, v/v). HPLC CHIRALCEL OD-H, *n*-hexane/2-propanol = 50/50, flow rate = 1.0 mL/min,  $\lambda = 256$  nm, retention time: 6.102 min, 8.757 min.  $[\alpha]_D^{24} = +416.38$  ( $c = 0.346$ ,  $\text{CH}_2\text{Cl}_2$ ).  $^1\text{H}$  NMR (600 MHz,  $\text{CDCl}_3$ )  $\delta$  8.40 (d,  $J = 7.2$  Hz, 1H), 8.09 (d,  $J = 8.4$  Hz, 1H), 7.93 (dd,  $J = 28.8, 7.8$  Hz, 2H), 7.85 (d,  $J = 6.6$  Hz, 1H), 7.79 (d,  $J = 8.4$  Hz, 1H), 7.60 (t,  $J = 7.8$  Hz, 1H), 7.48 (t,  $J = 7.2$  Hz, 1H), 7.38 (t,  $J = 7.8$  Hz, 1H), 7.29 (t,  $J = 7.2$  Hz, 1H), 7.01 (dd,  $J = 13.8, 8.4$  Hz, 2H), 5.00 (br, 1H), 4.52 – 4.45 (m, 1H), 4.33 (d,  $J = 11.4$  Hz, 1H).  $^{13}\text{C}$  NMR (150 MHz,  $\text{CDCl}_3$ )  $\delta$  146.2, 138.9, 137.5, 133.6,

131.7, 130.9, 130.1, 129.8, 129.5, 129.5, 128.7, 128.1, 127.3, 127.2, 126.8, 126.4, 125.9, 125.2, 124.4, 65.4. **HRMS** (ESI): exact mass calcd for  $C_{20}H_{15}NNaO_2^+$  ( $M+Na$ )<sup>+</sup> requires m/z 324.0995, found m/z 324.0986.

## 4. Copies of NMR spectra

### (1) Copies of NMR spectra of starting materials

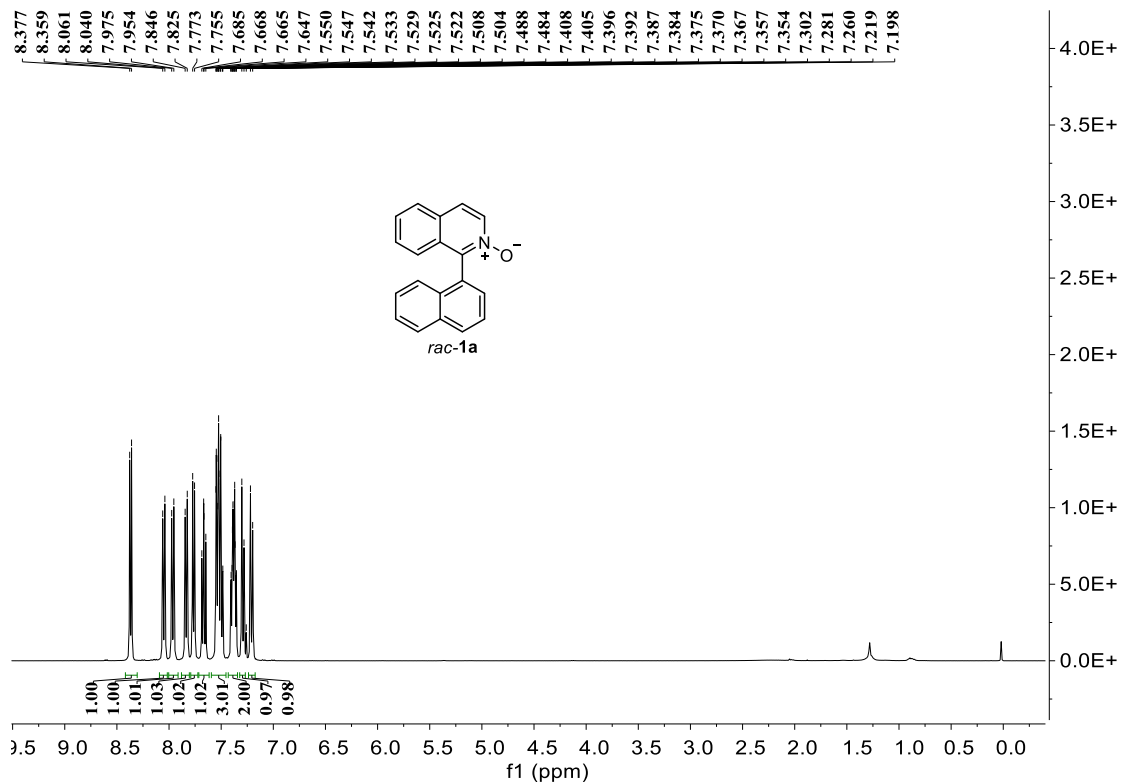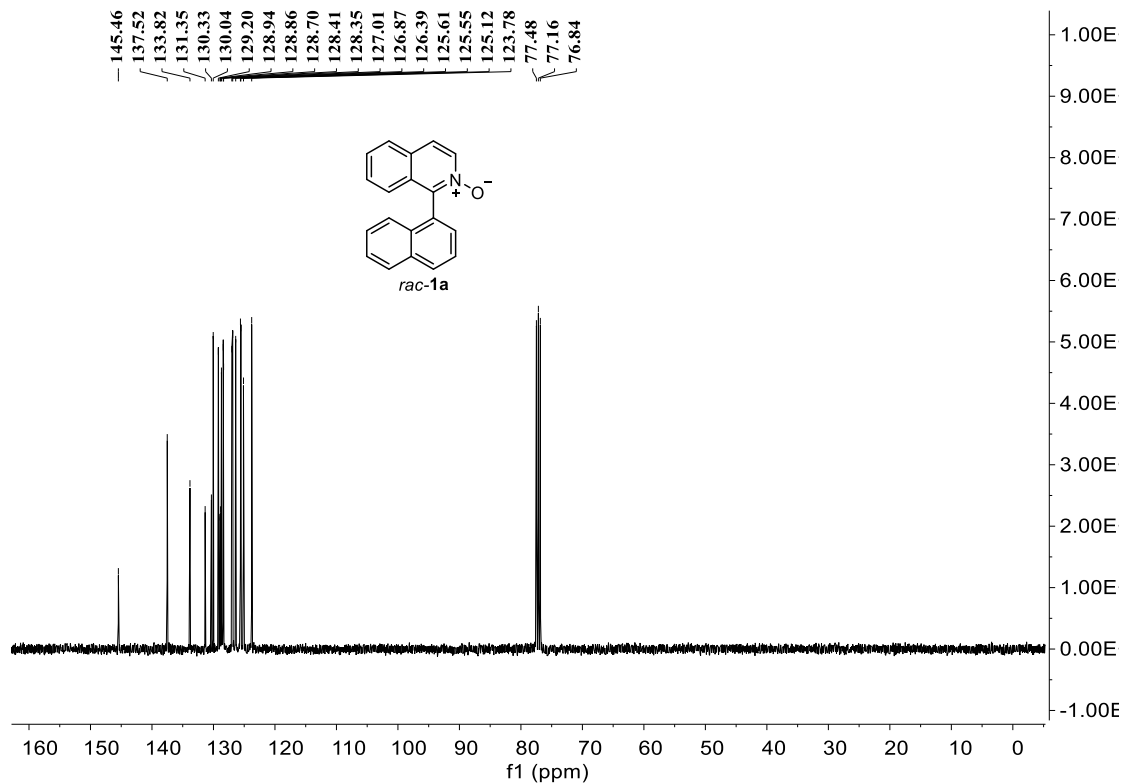

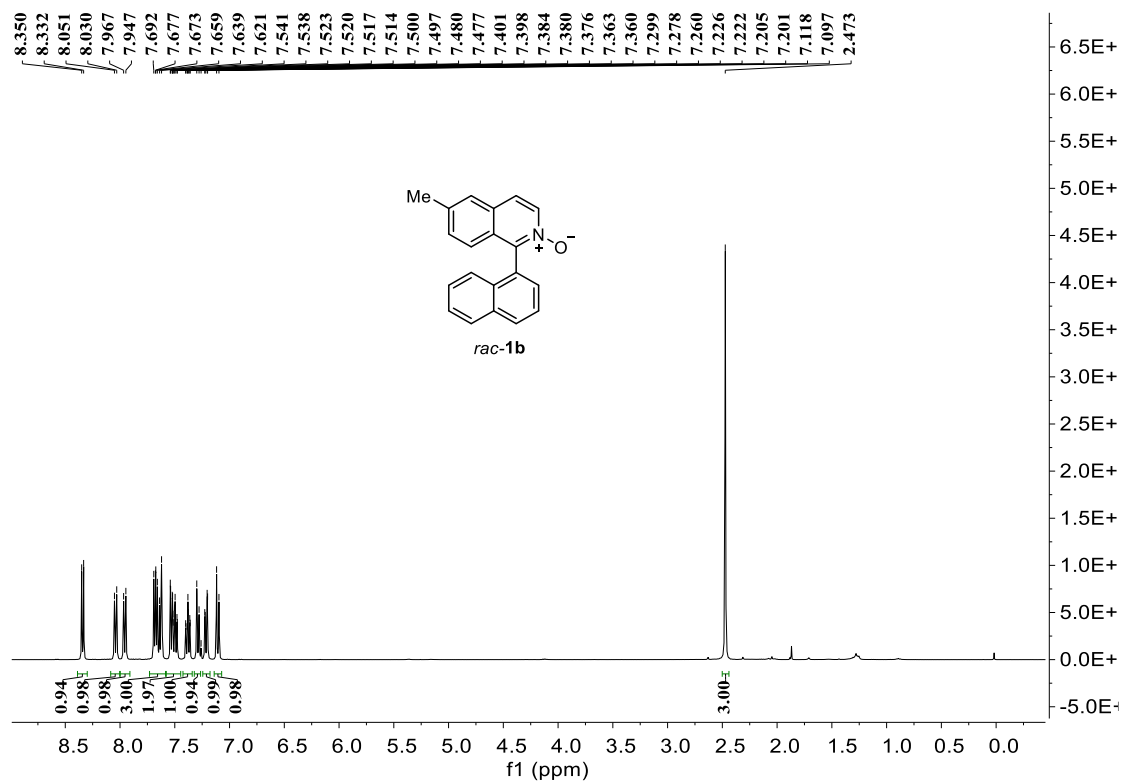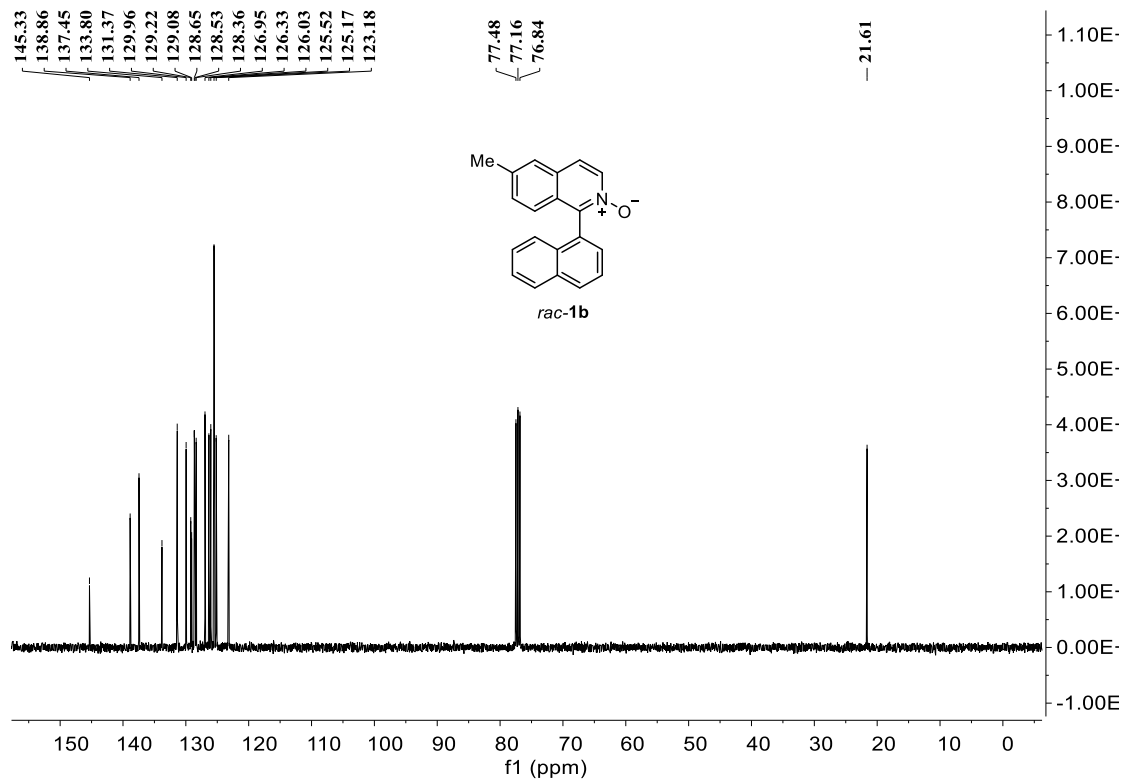

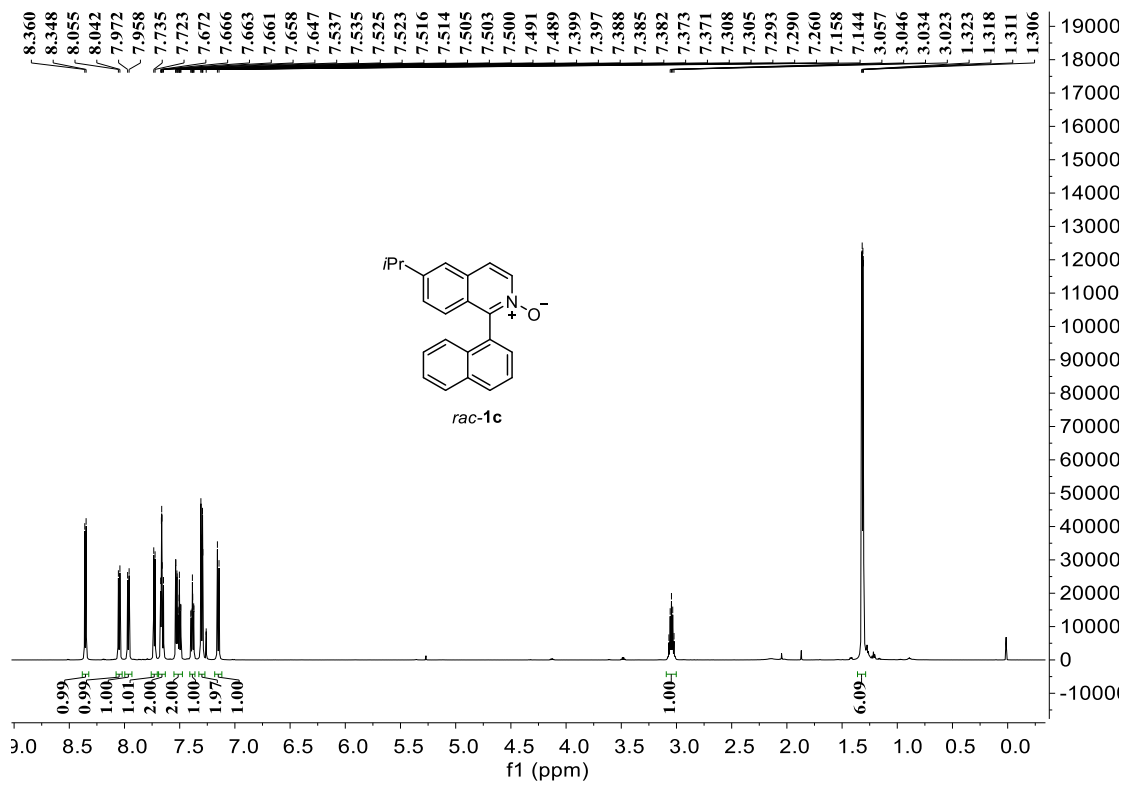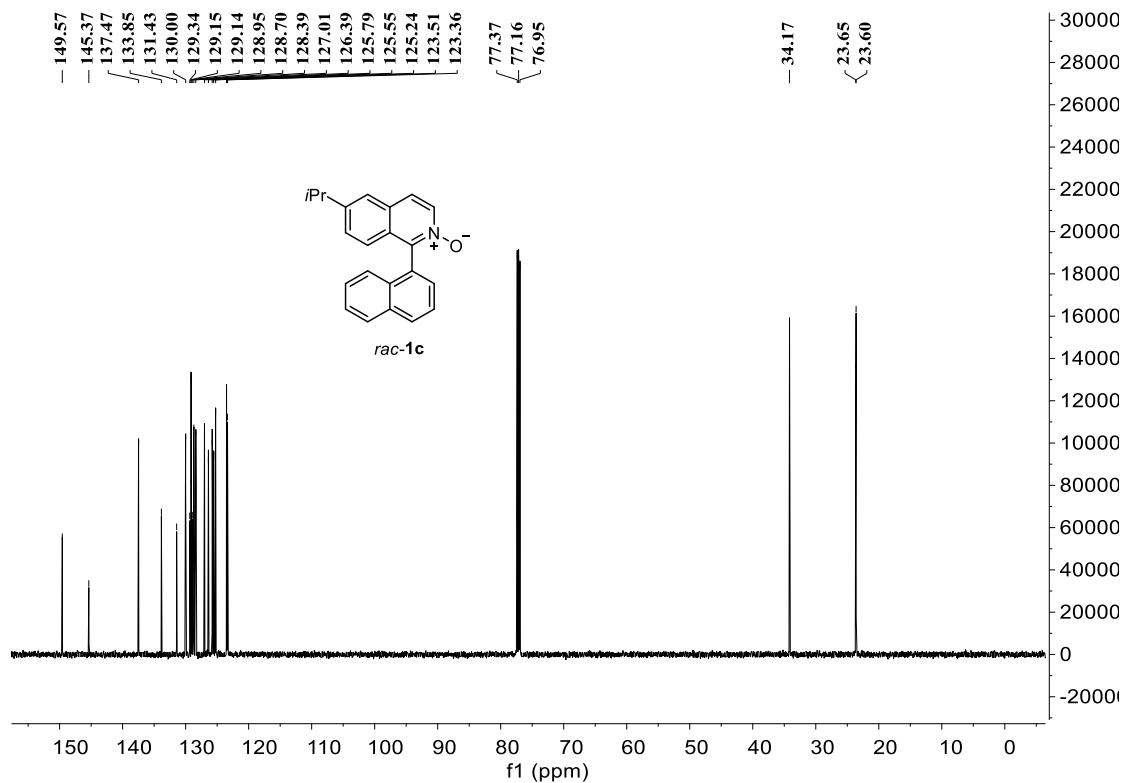

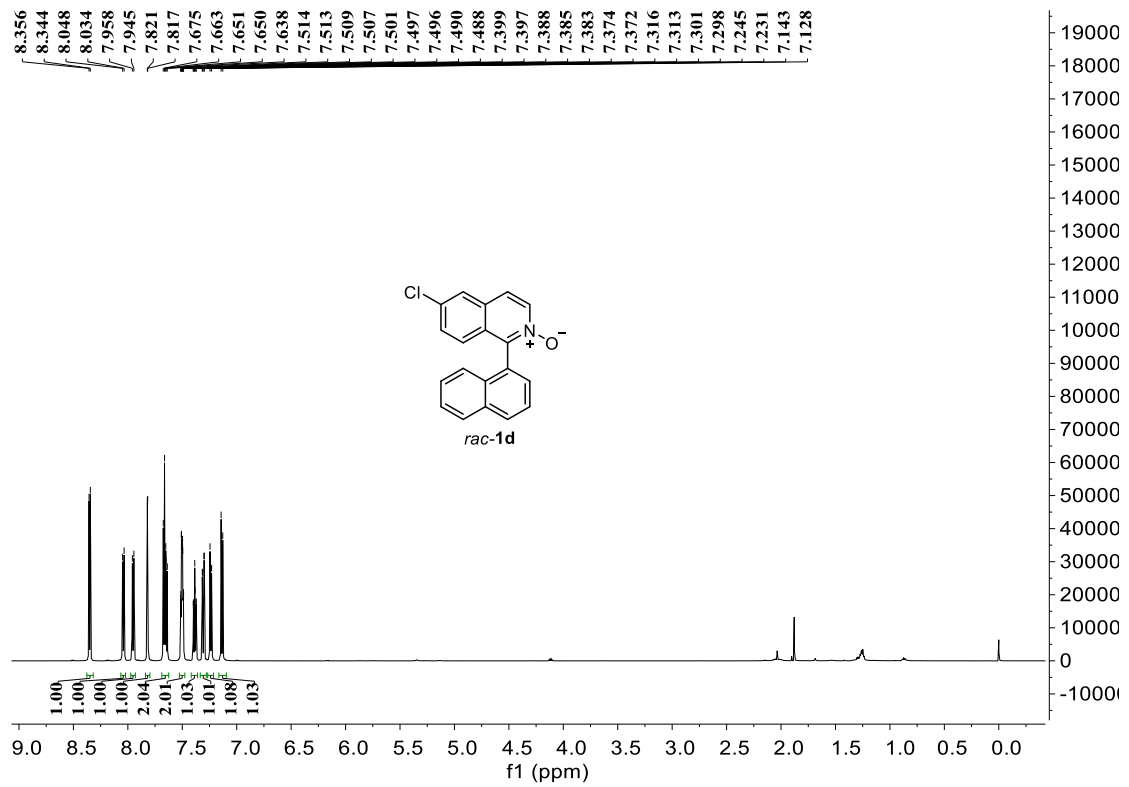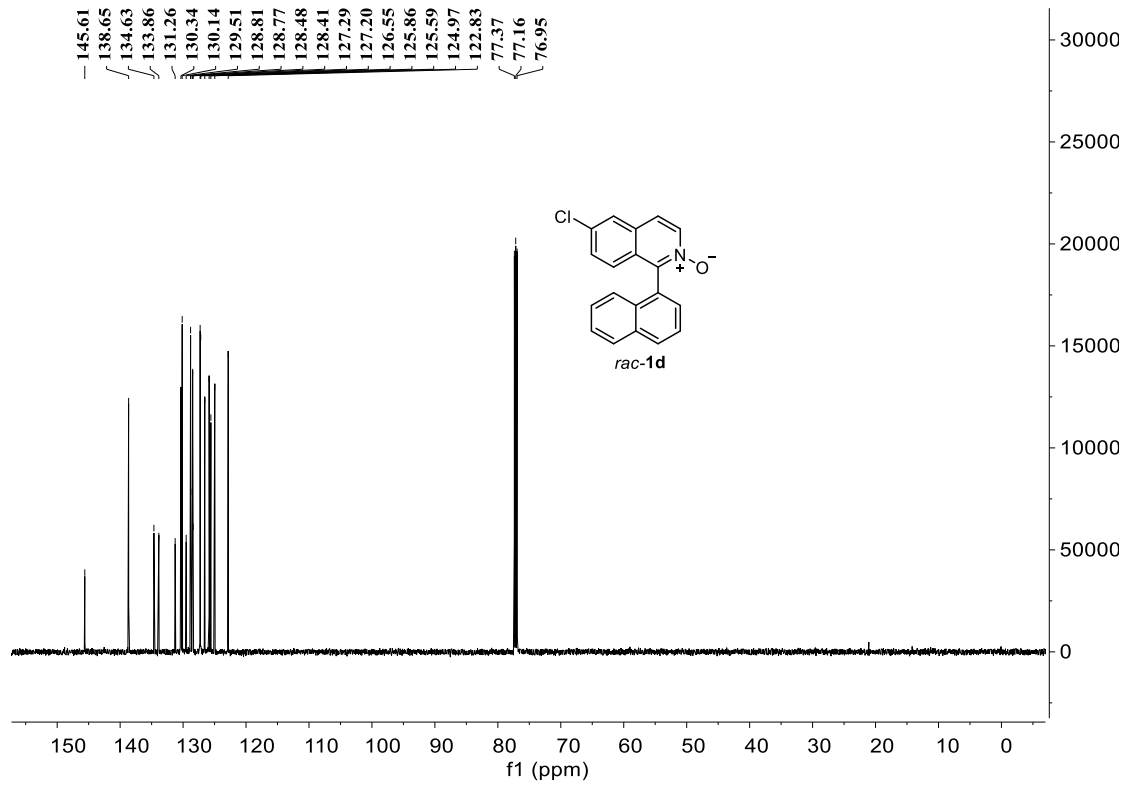



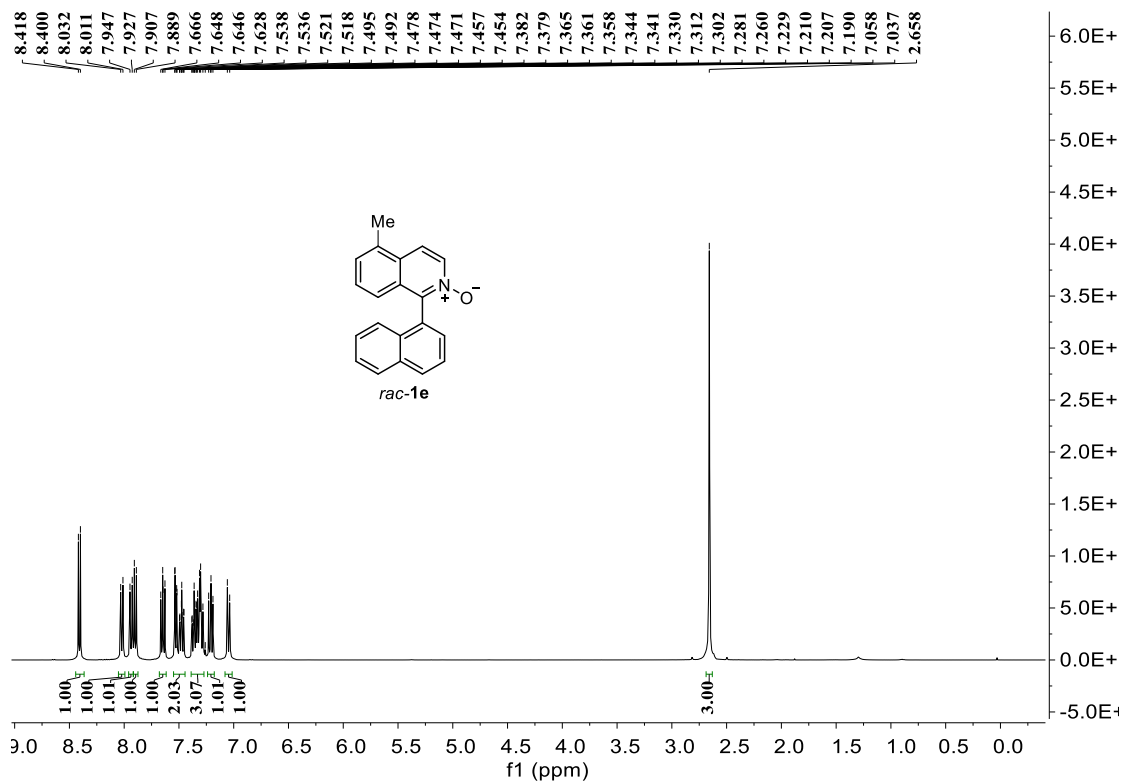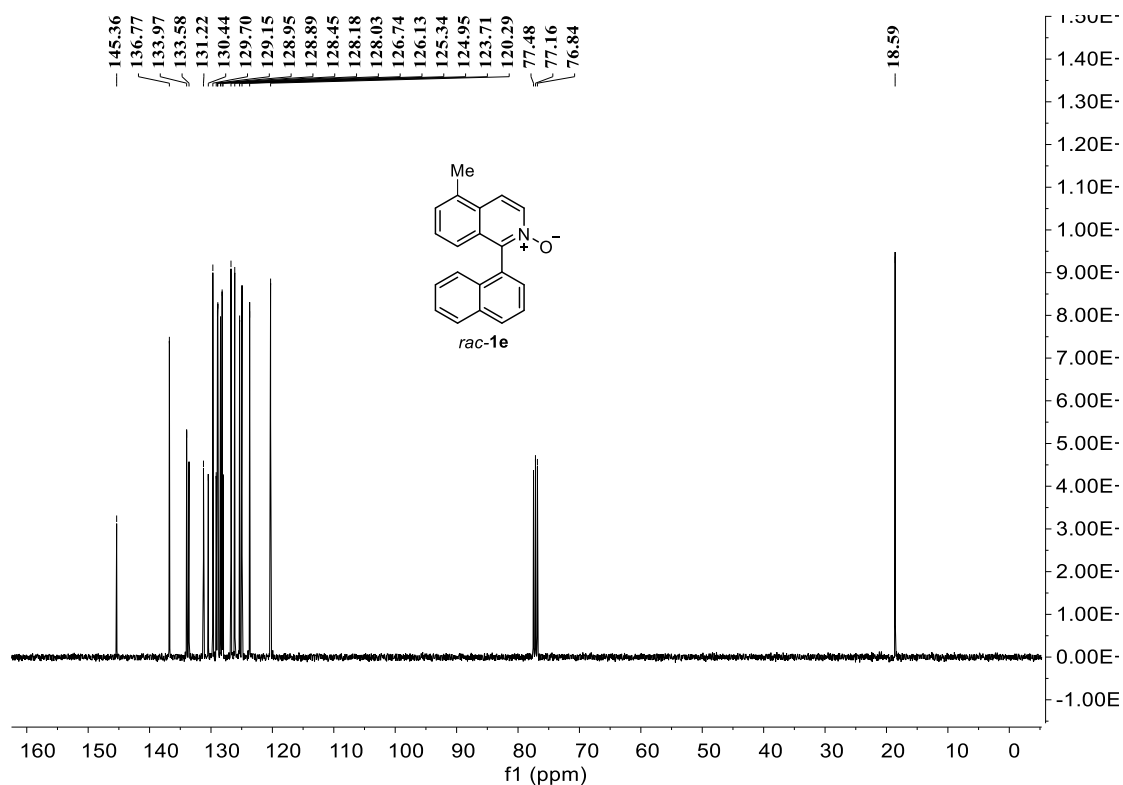

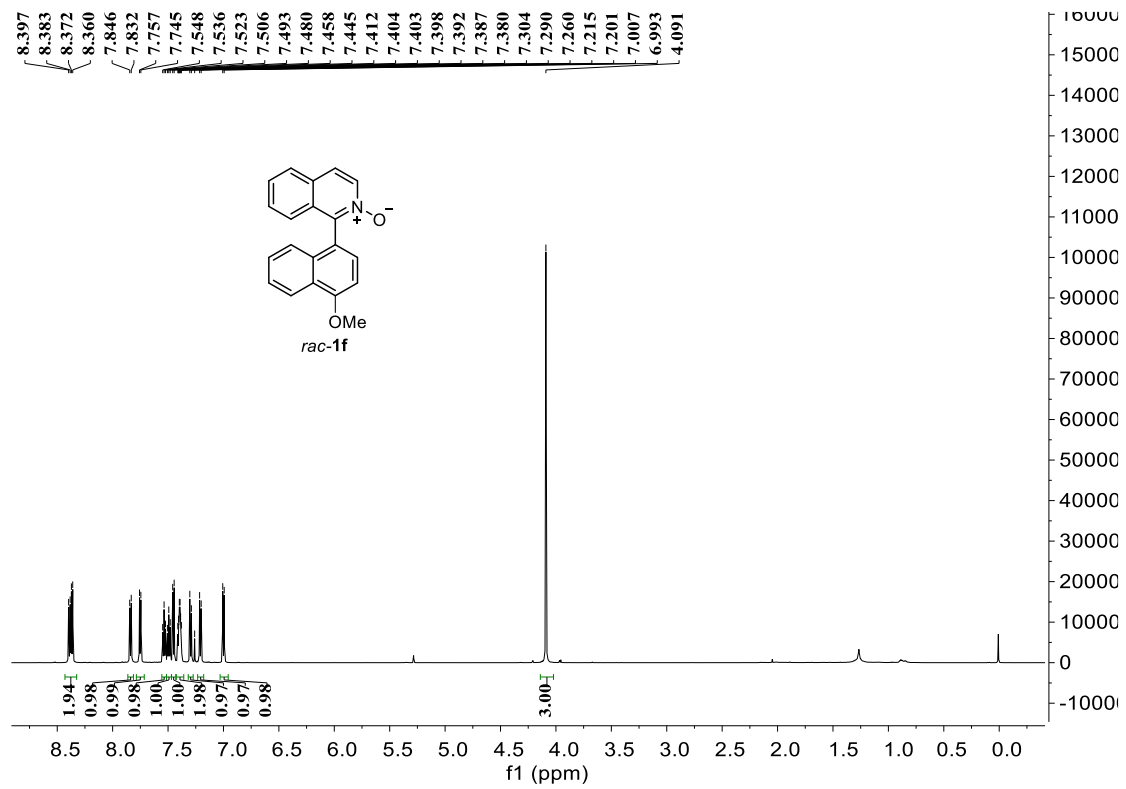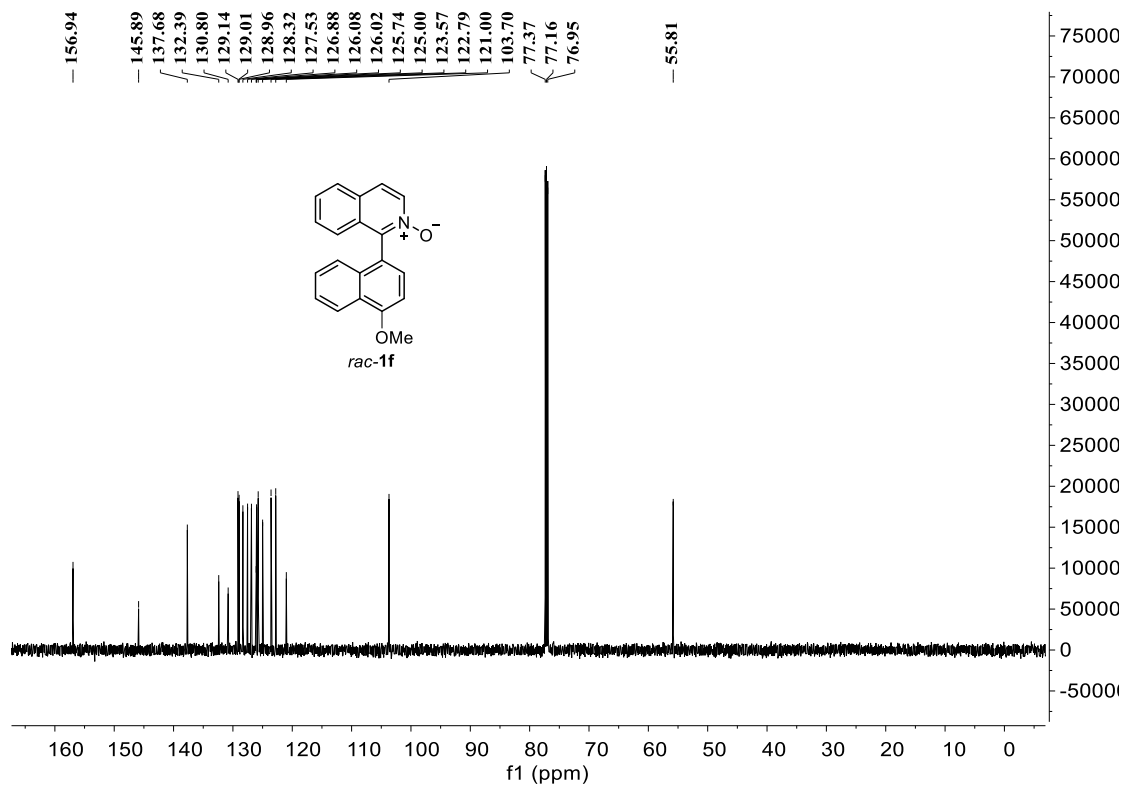

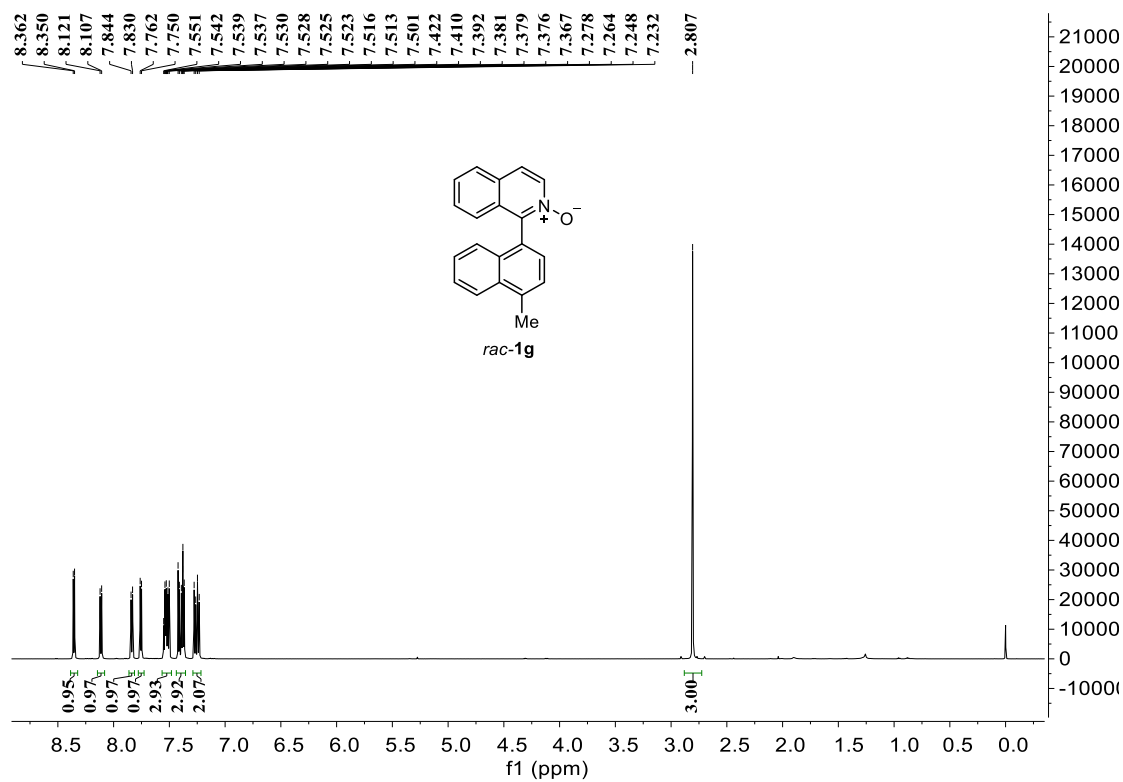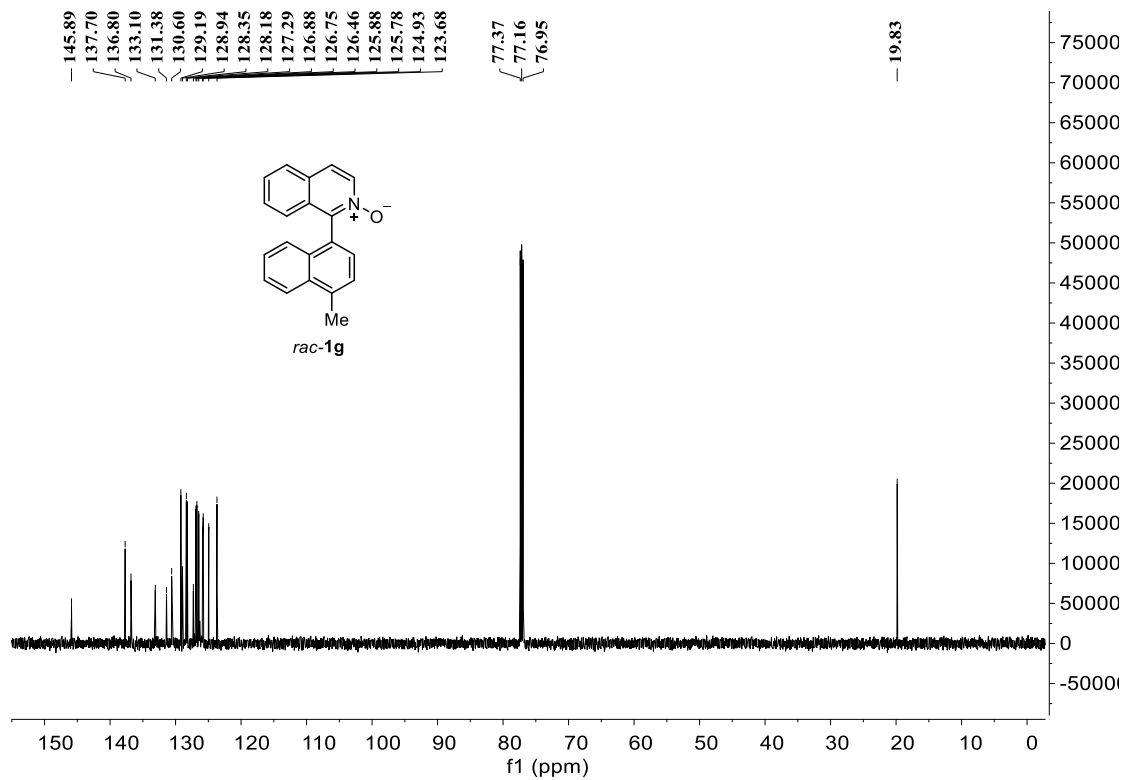

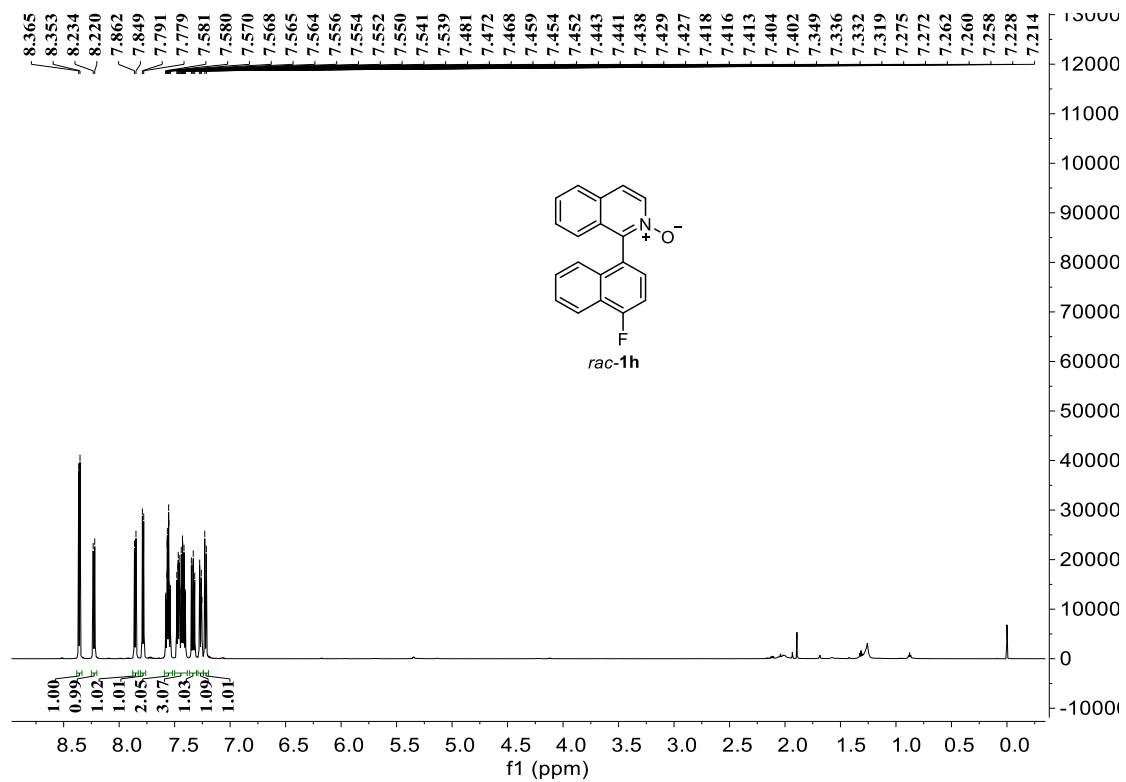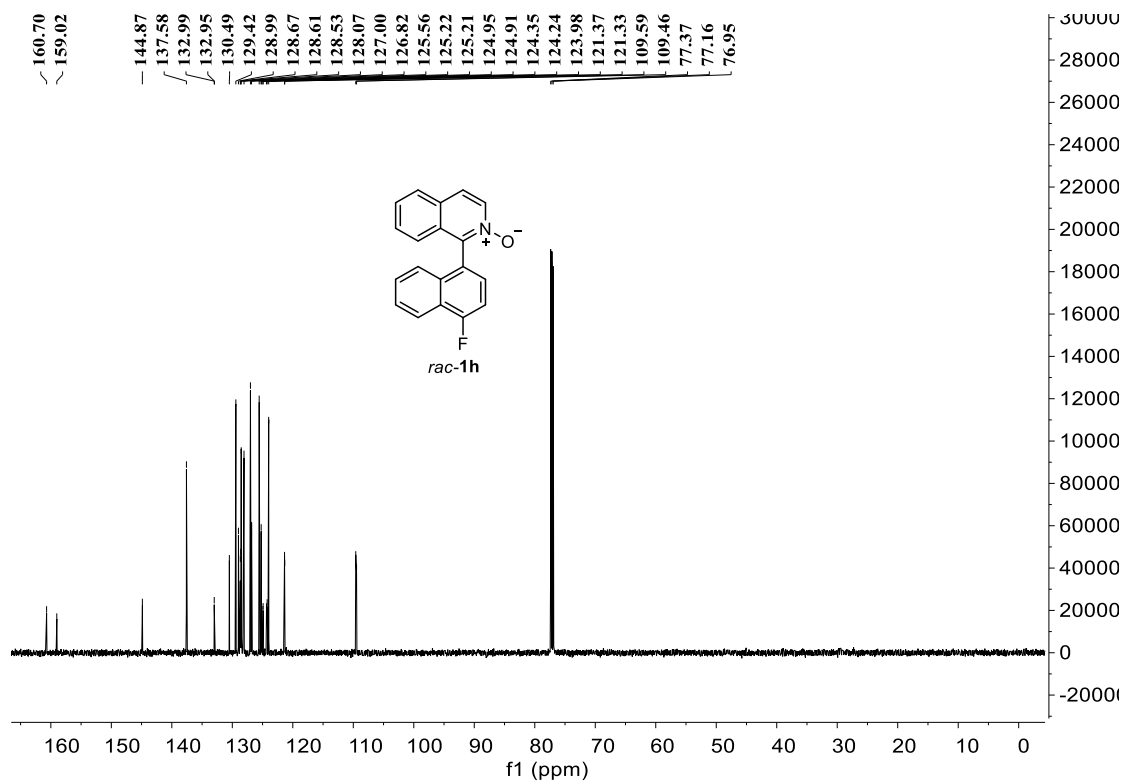

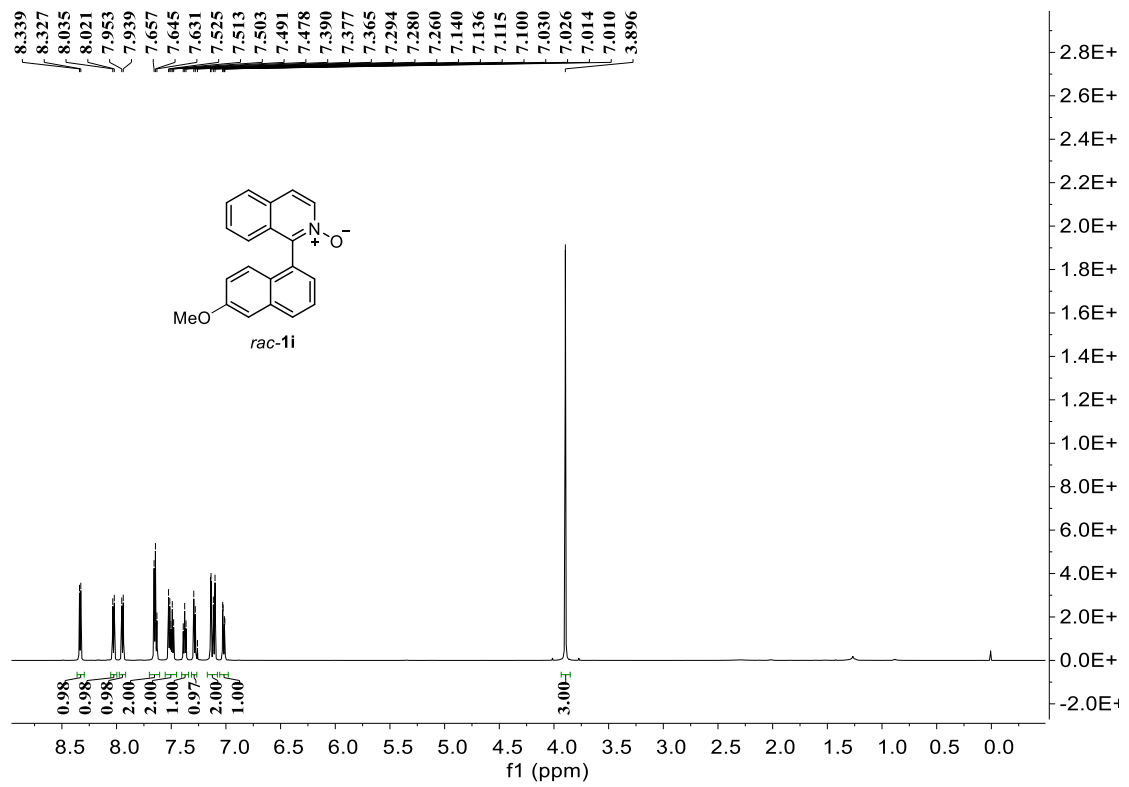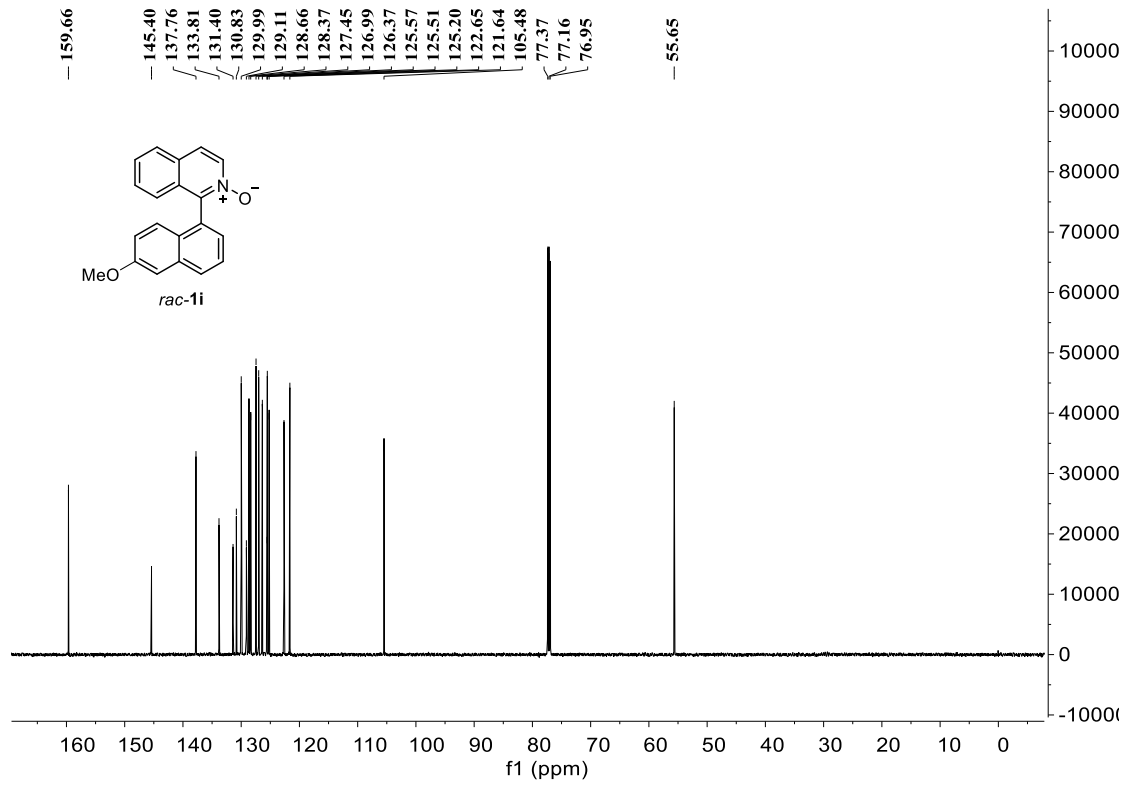

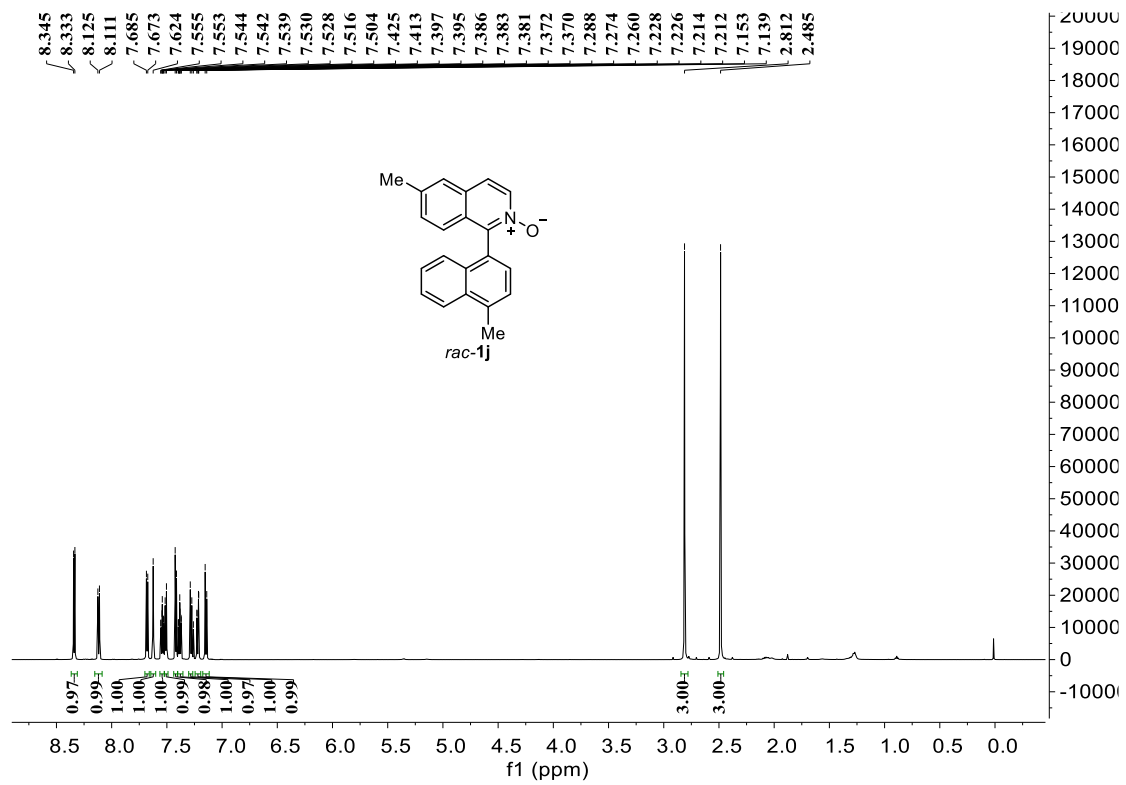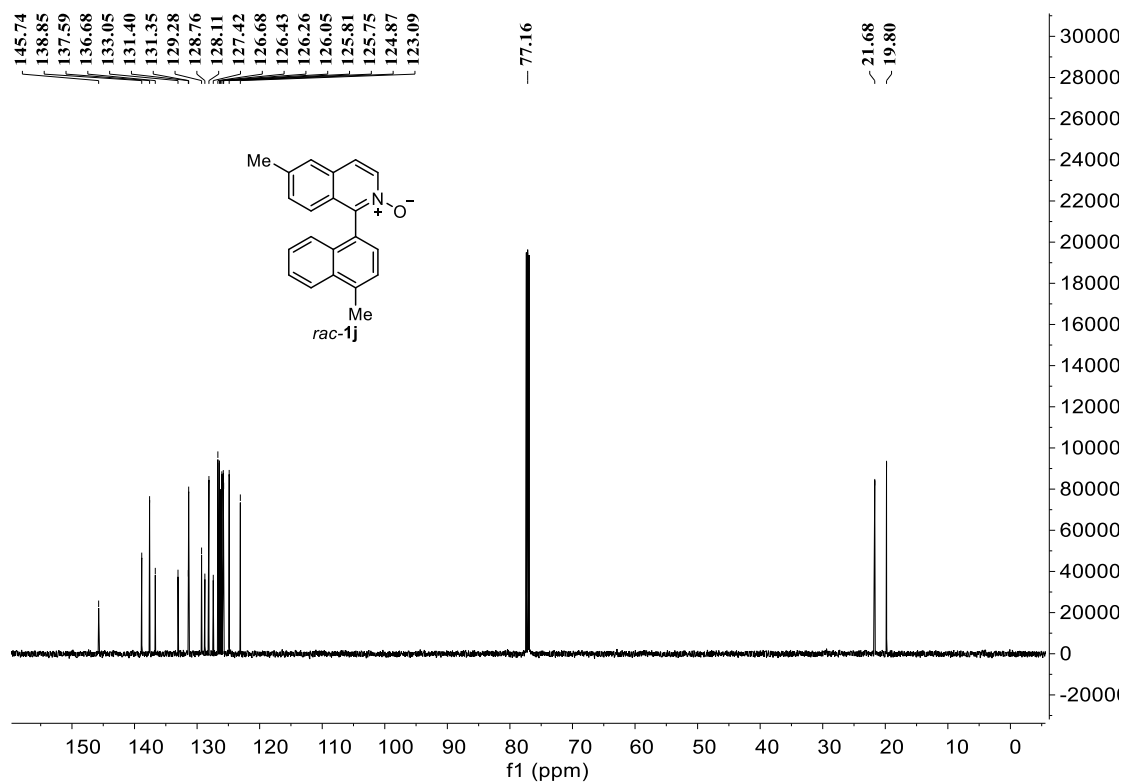

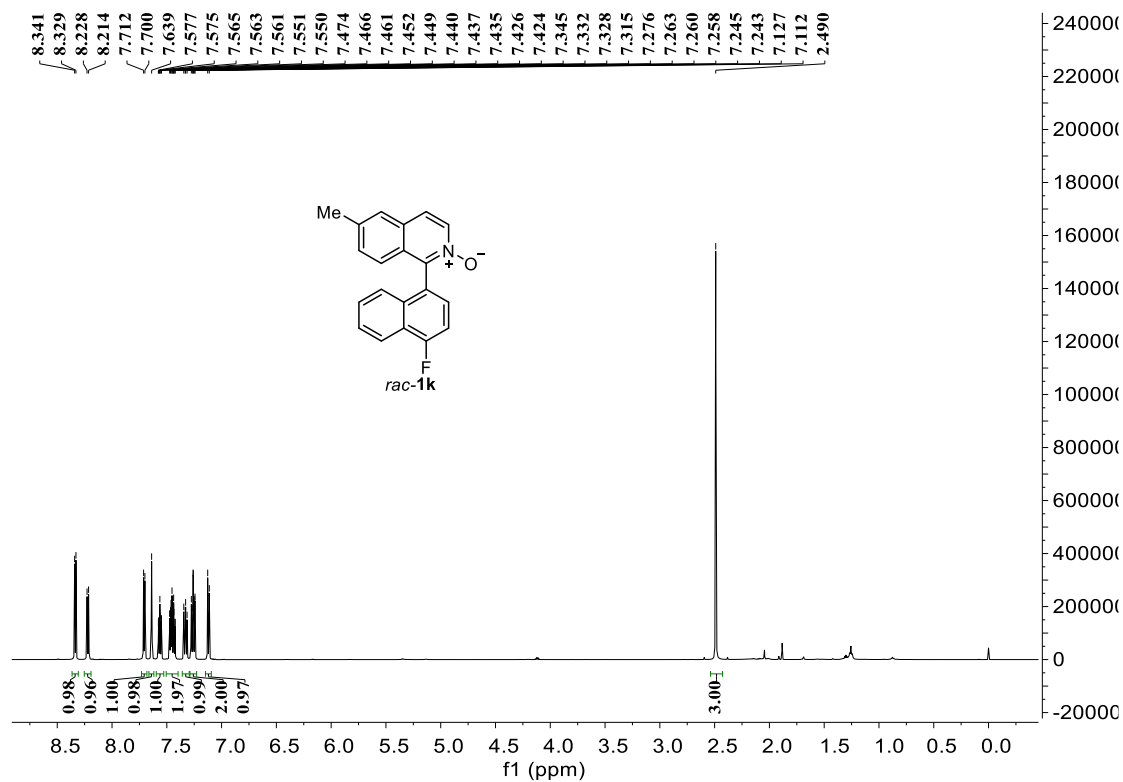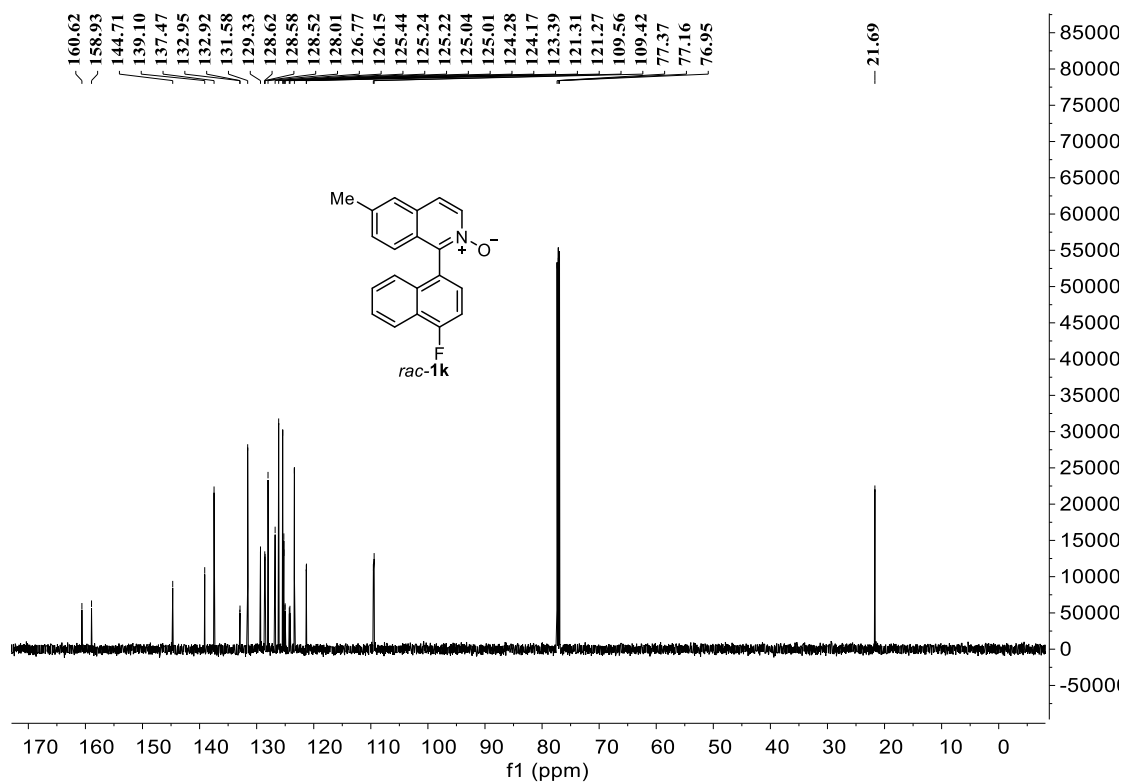

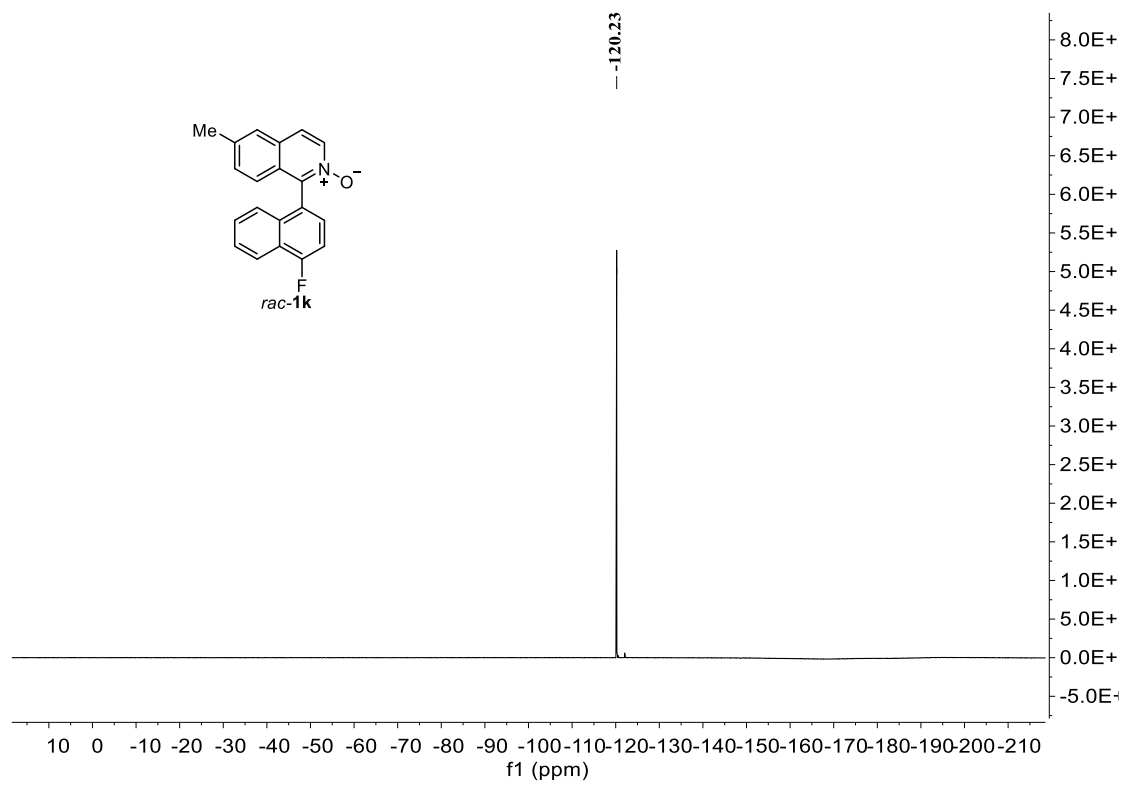



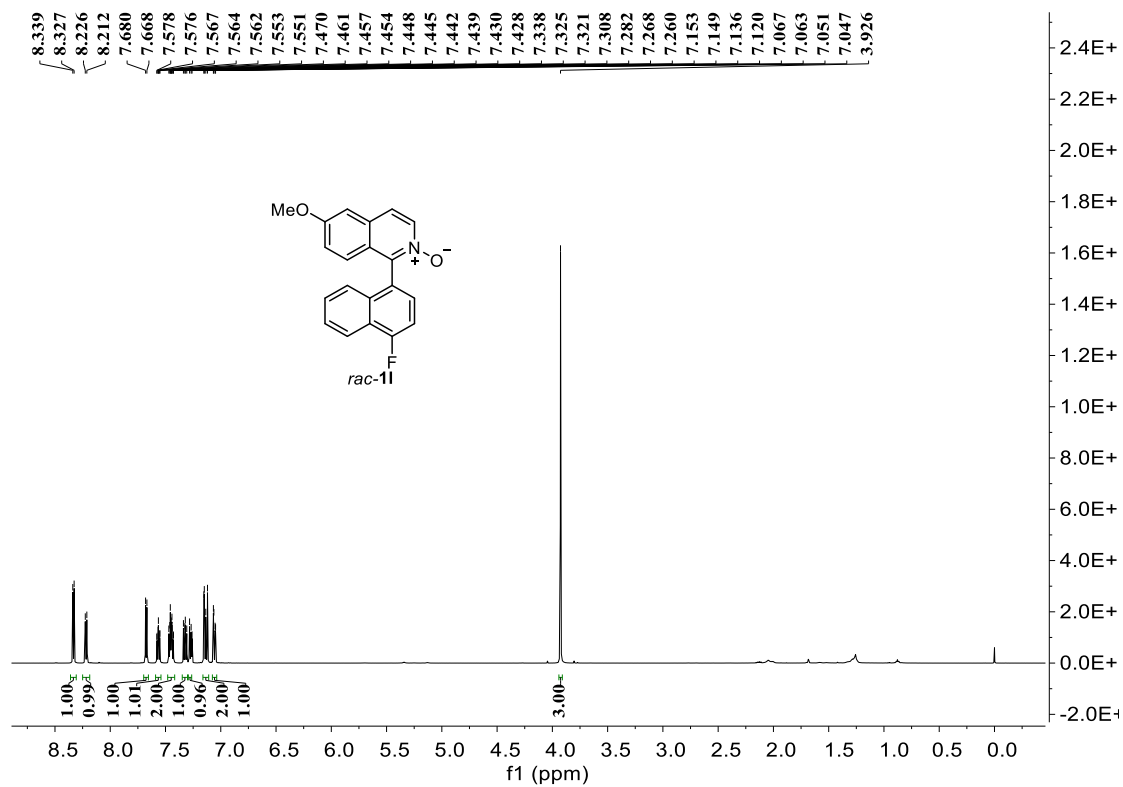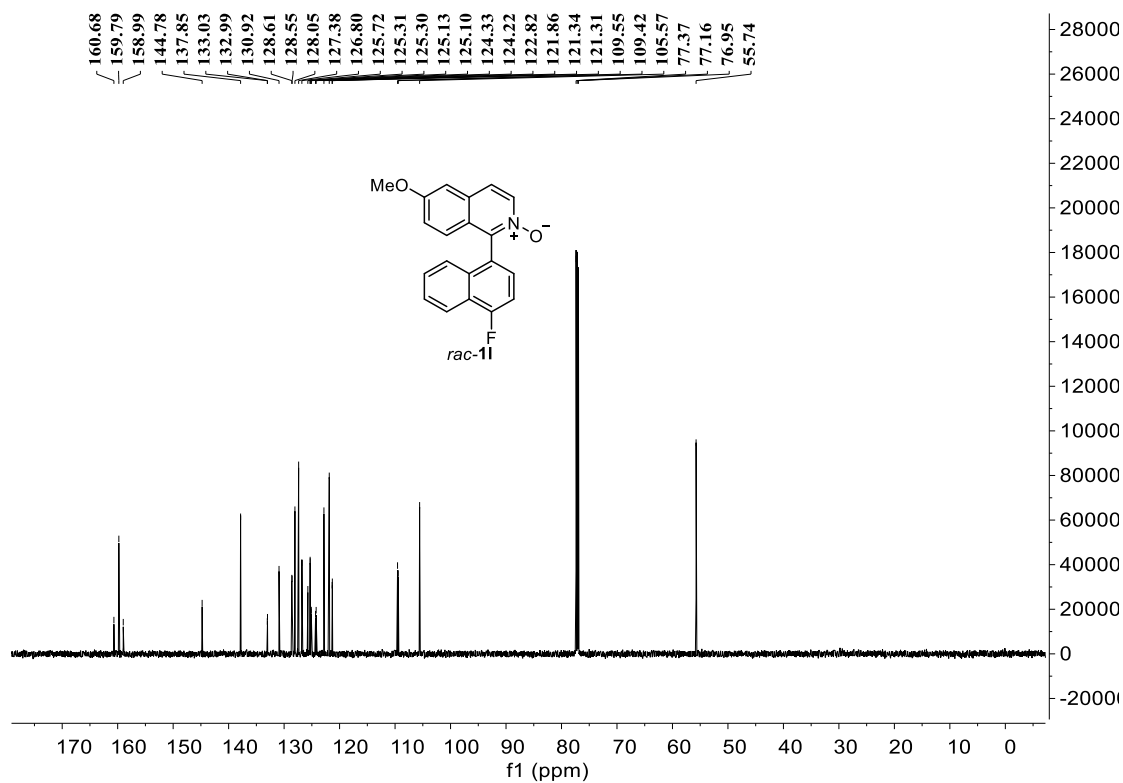

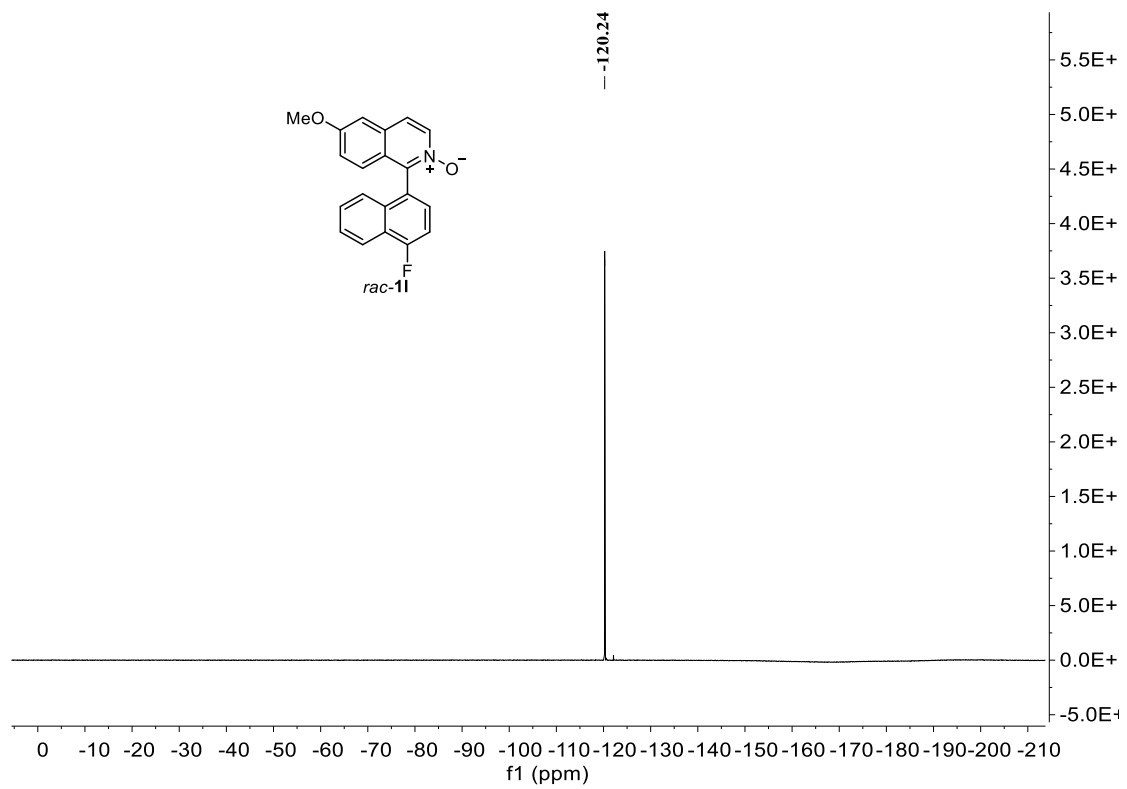

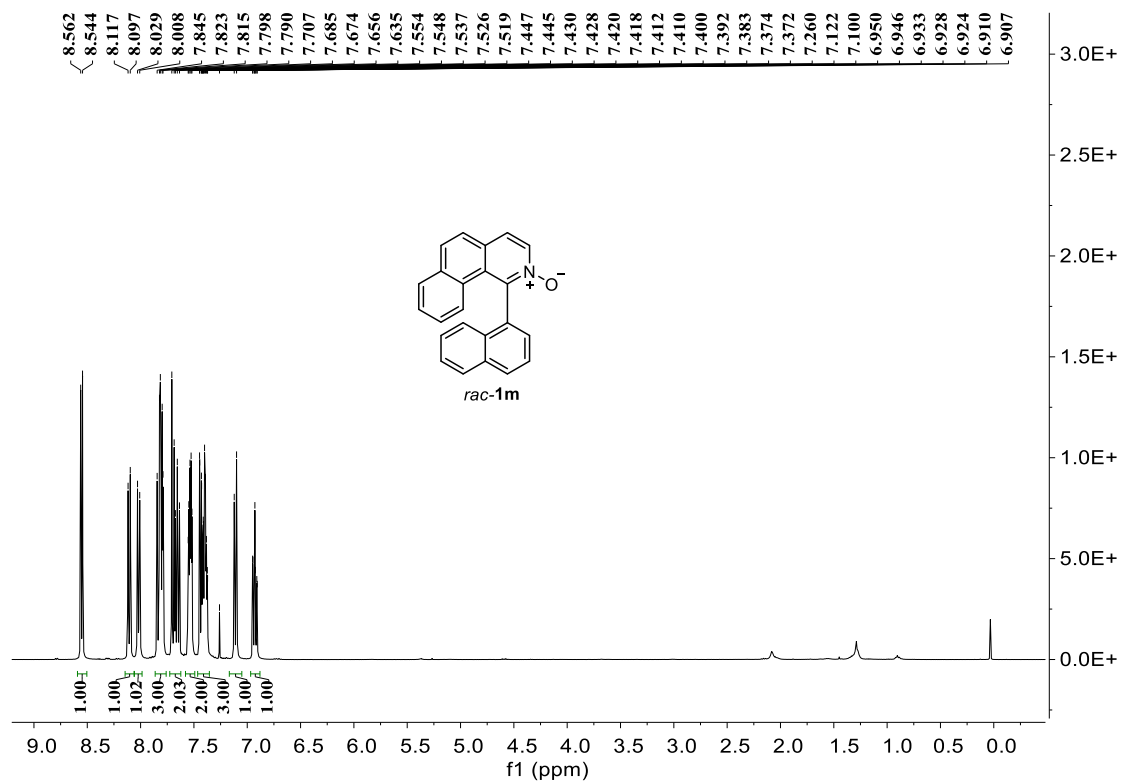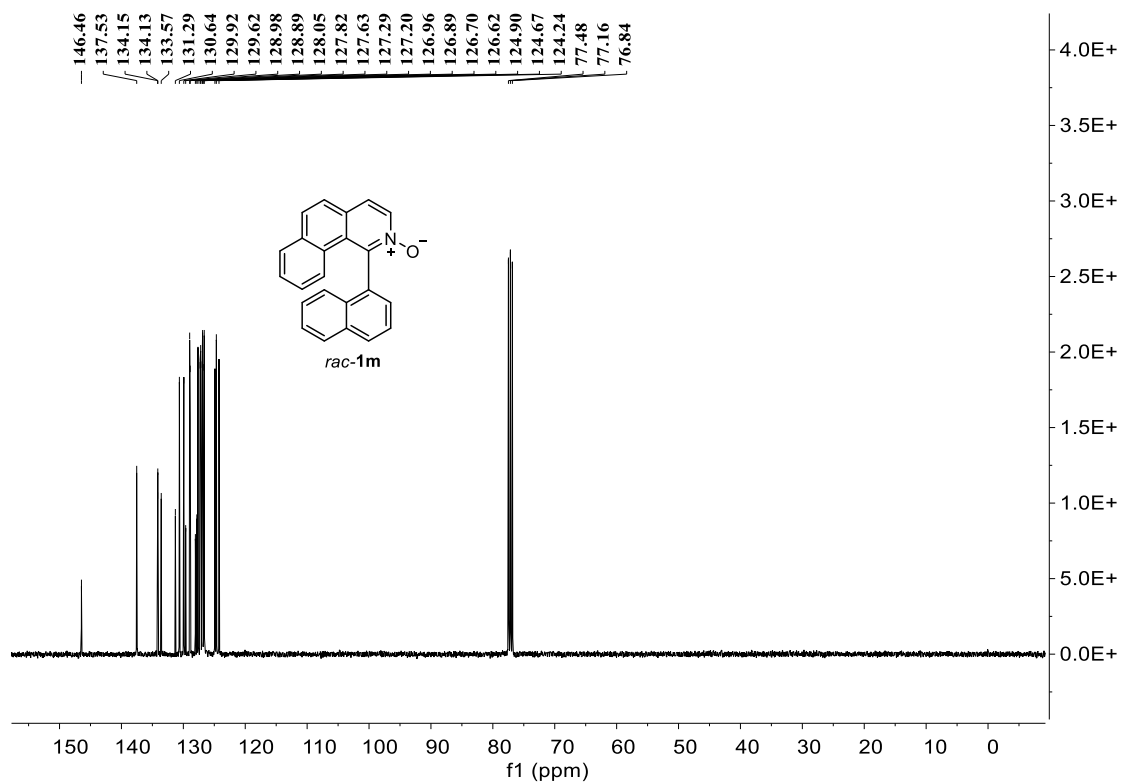

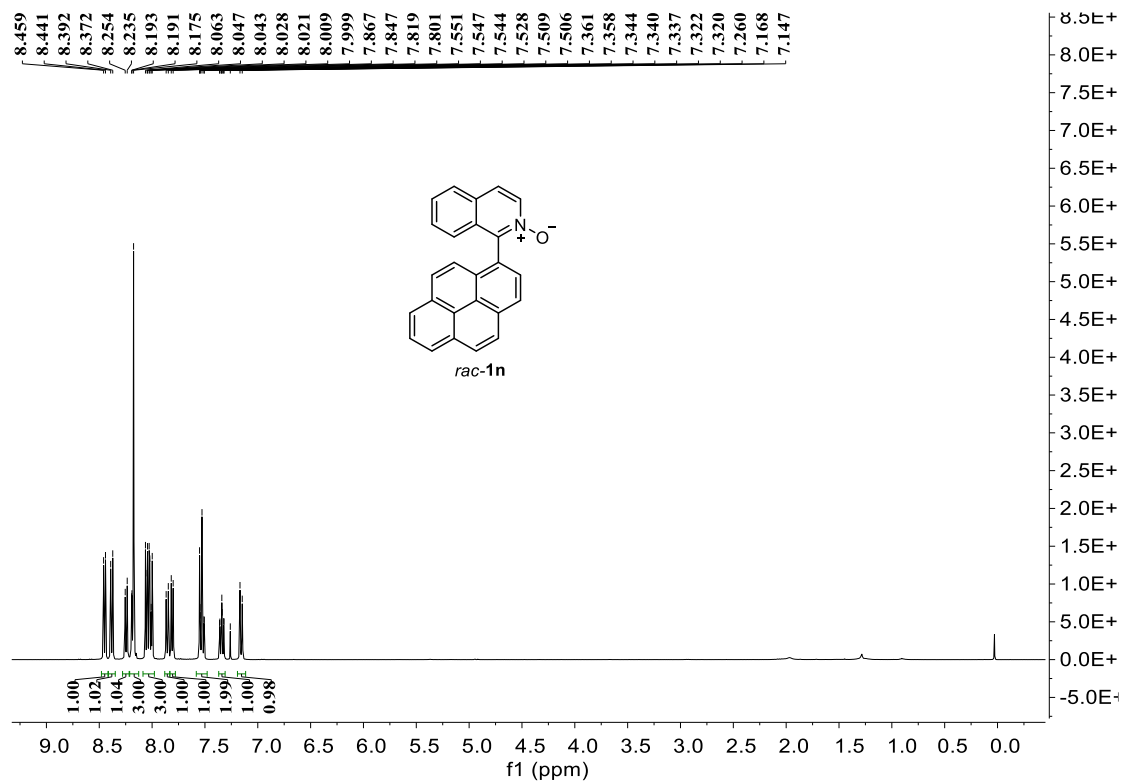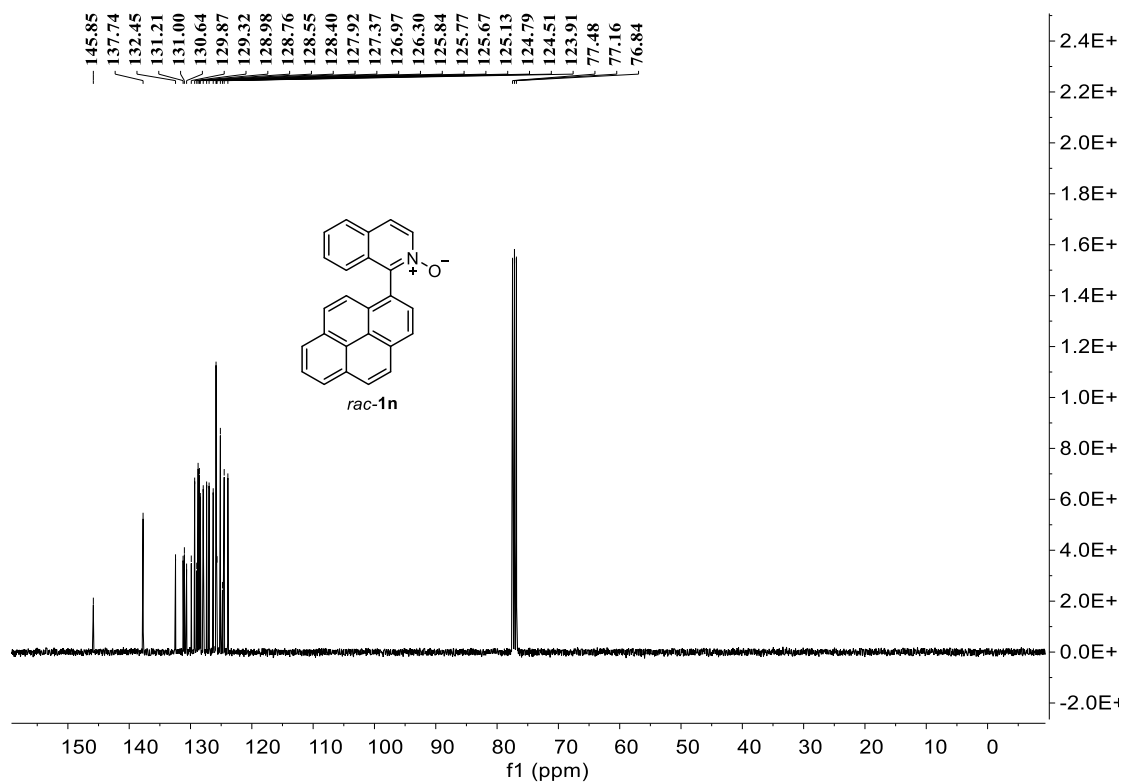

## (2) Copies of NMR spectra of products

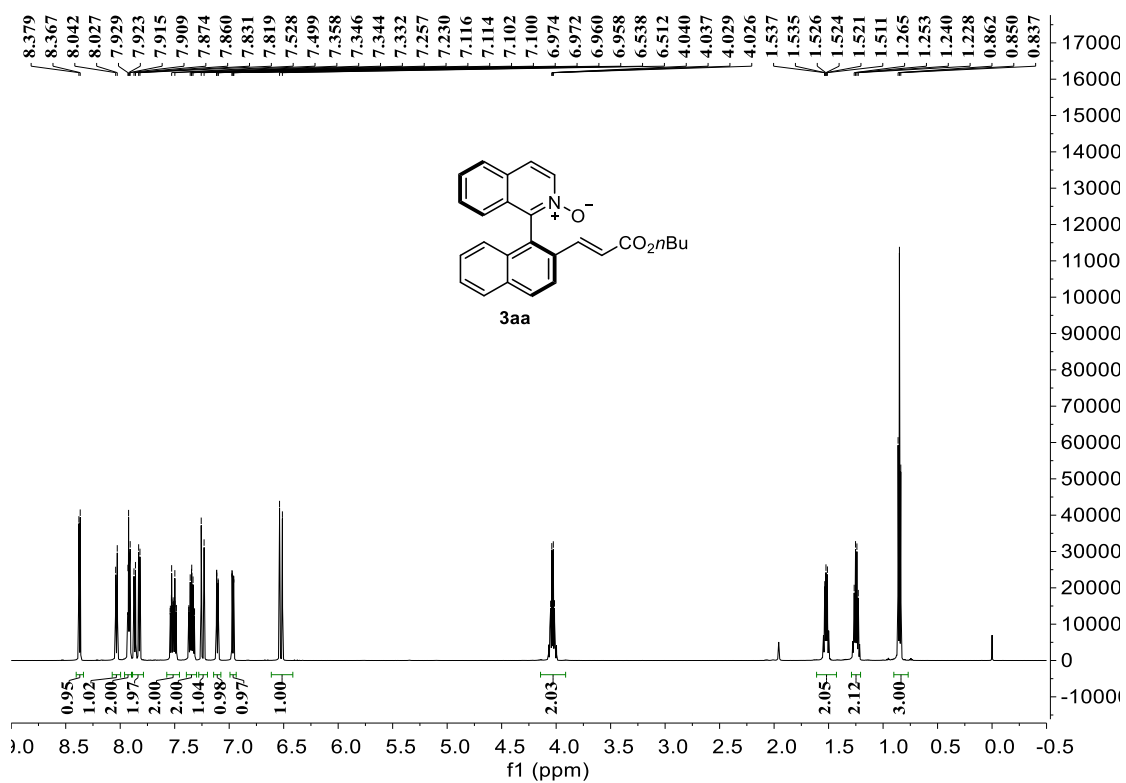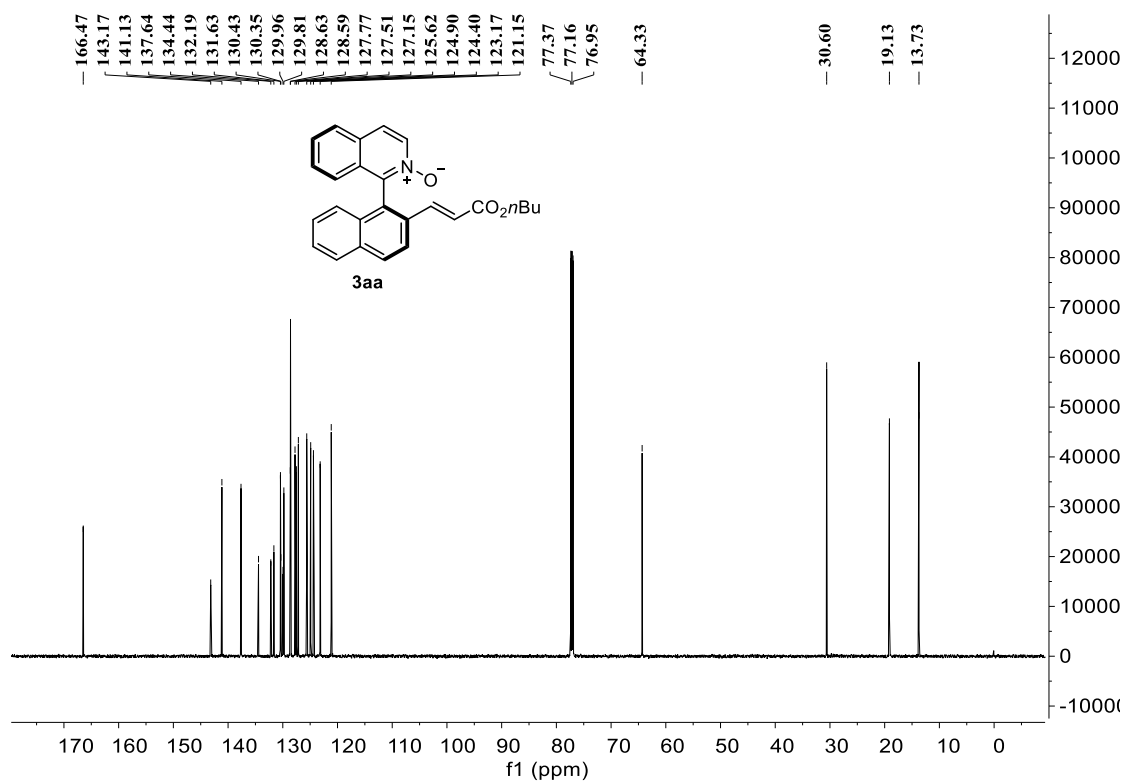

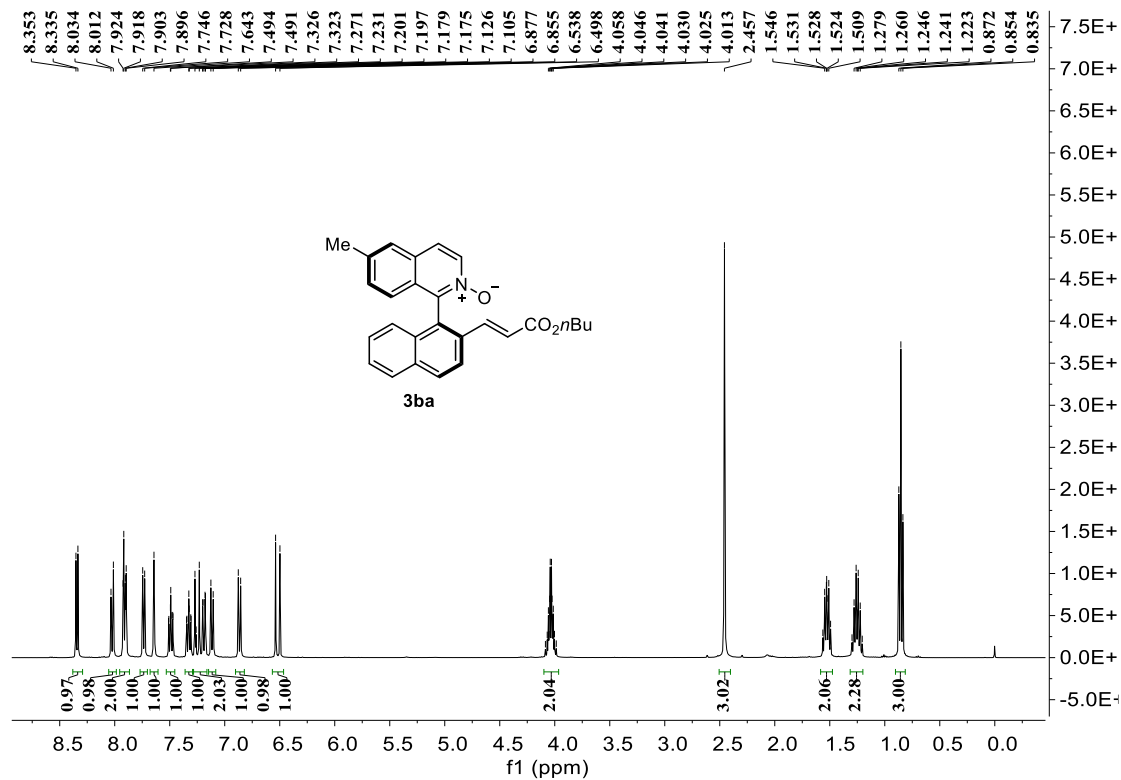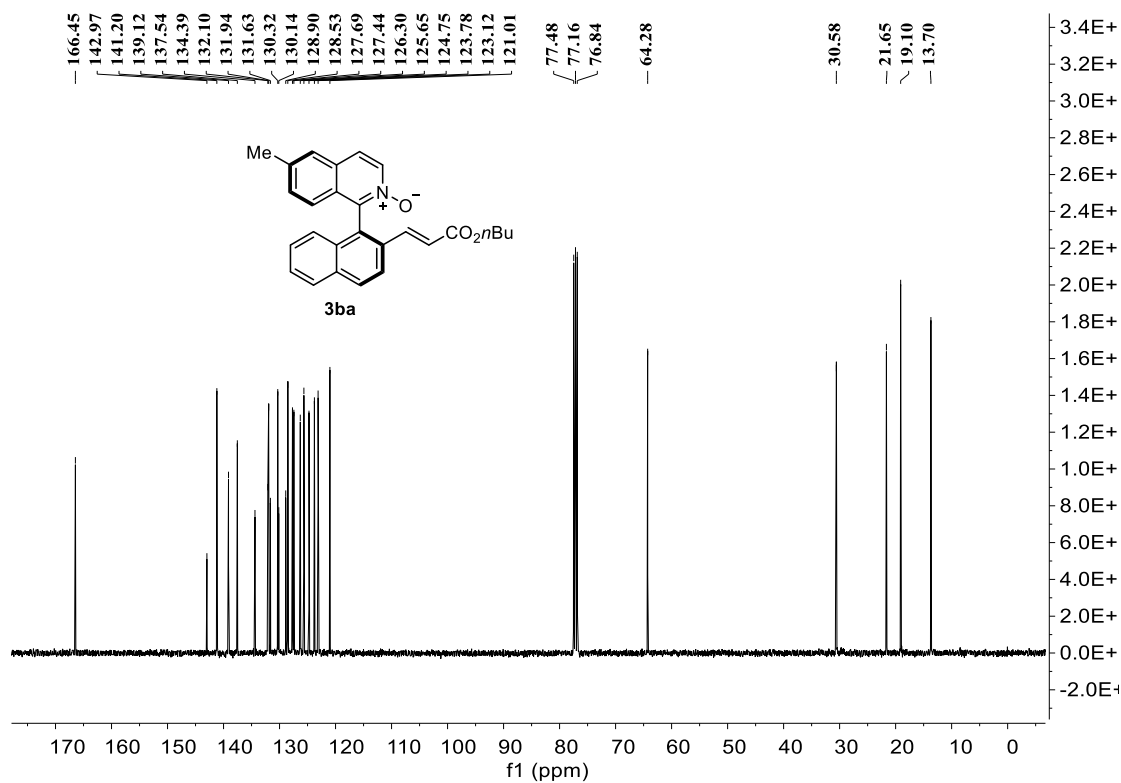

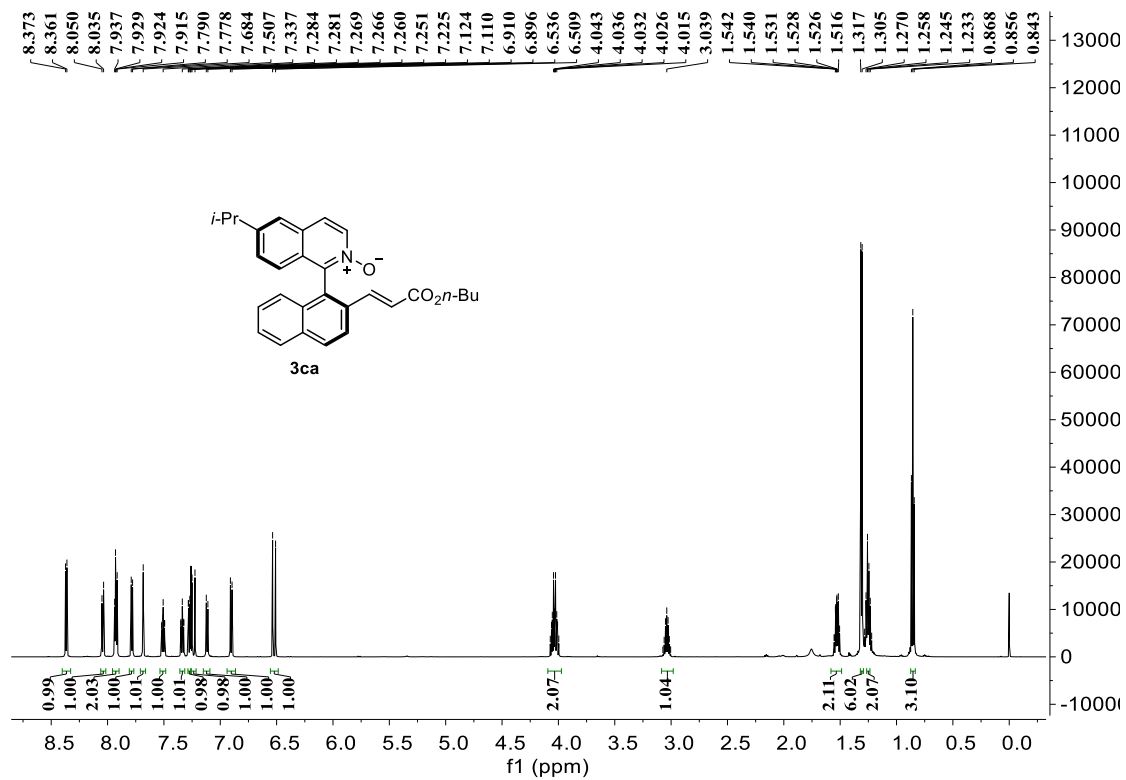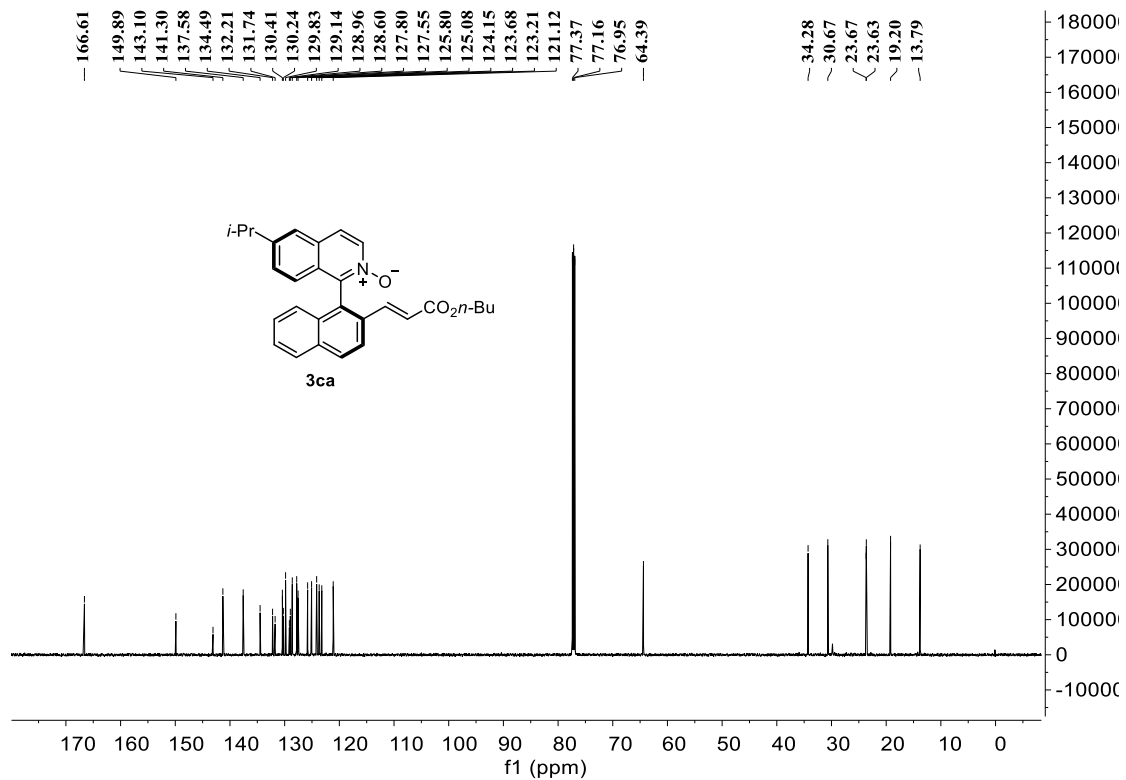

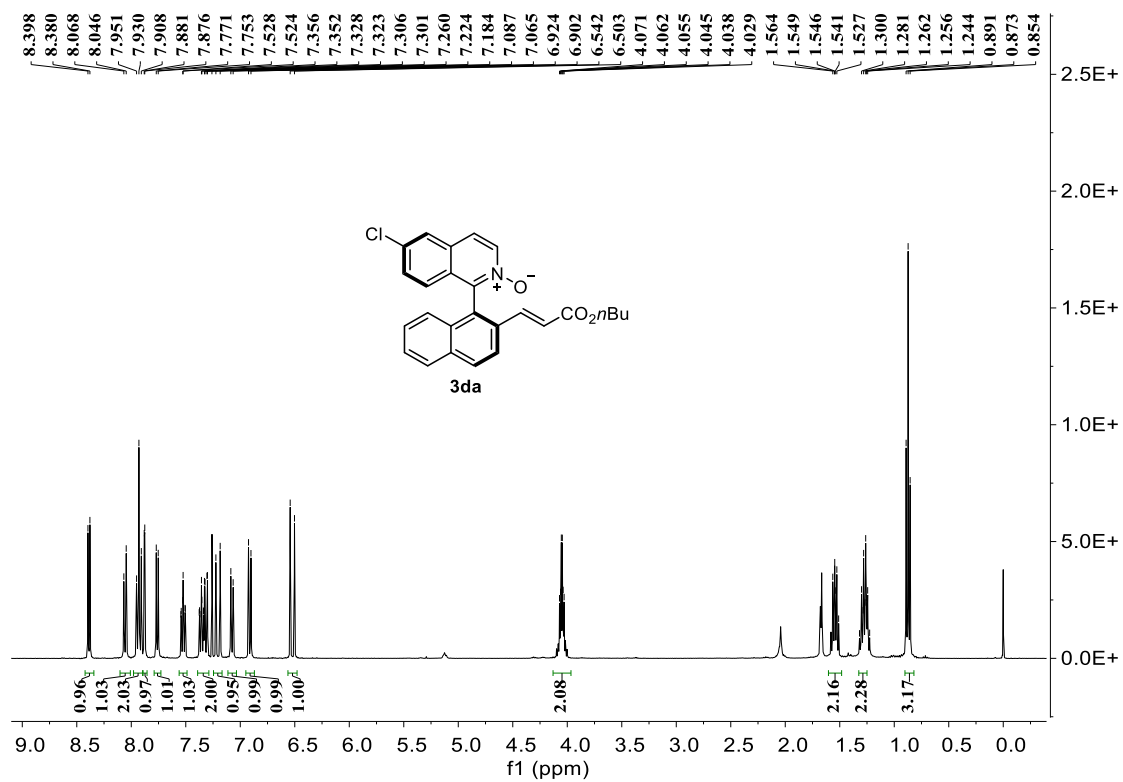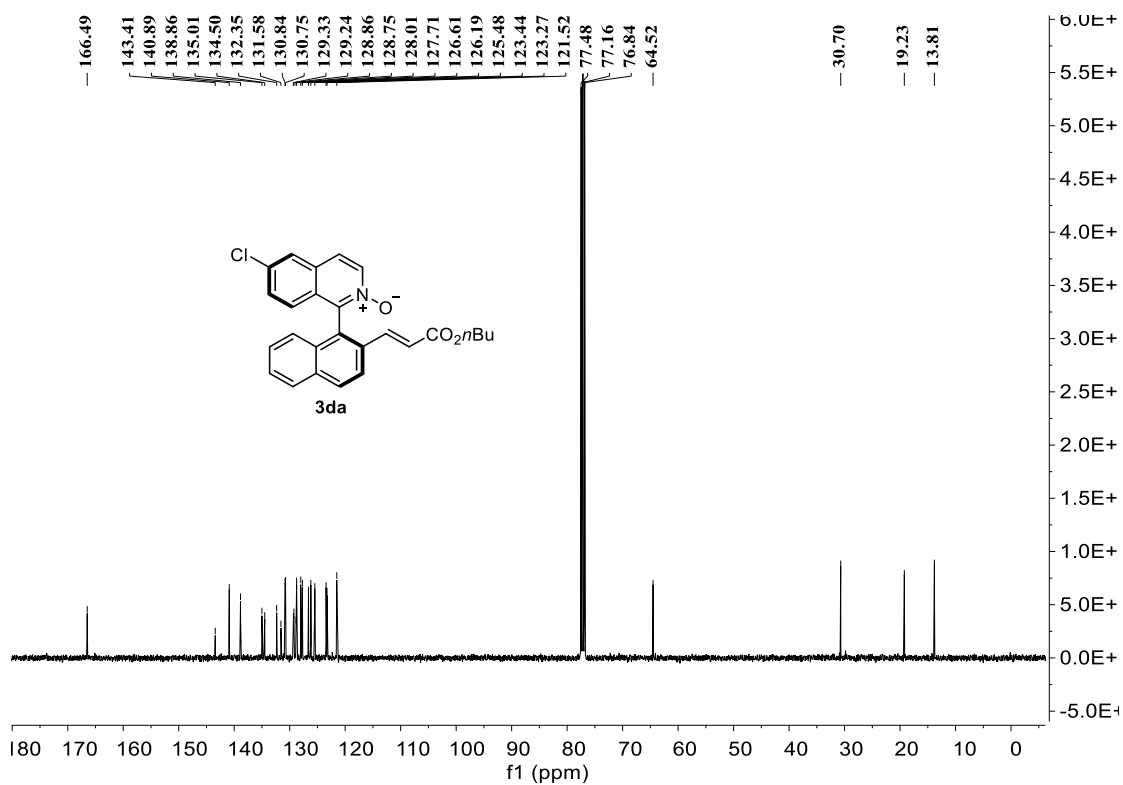



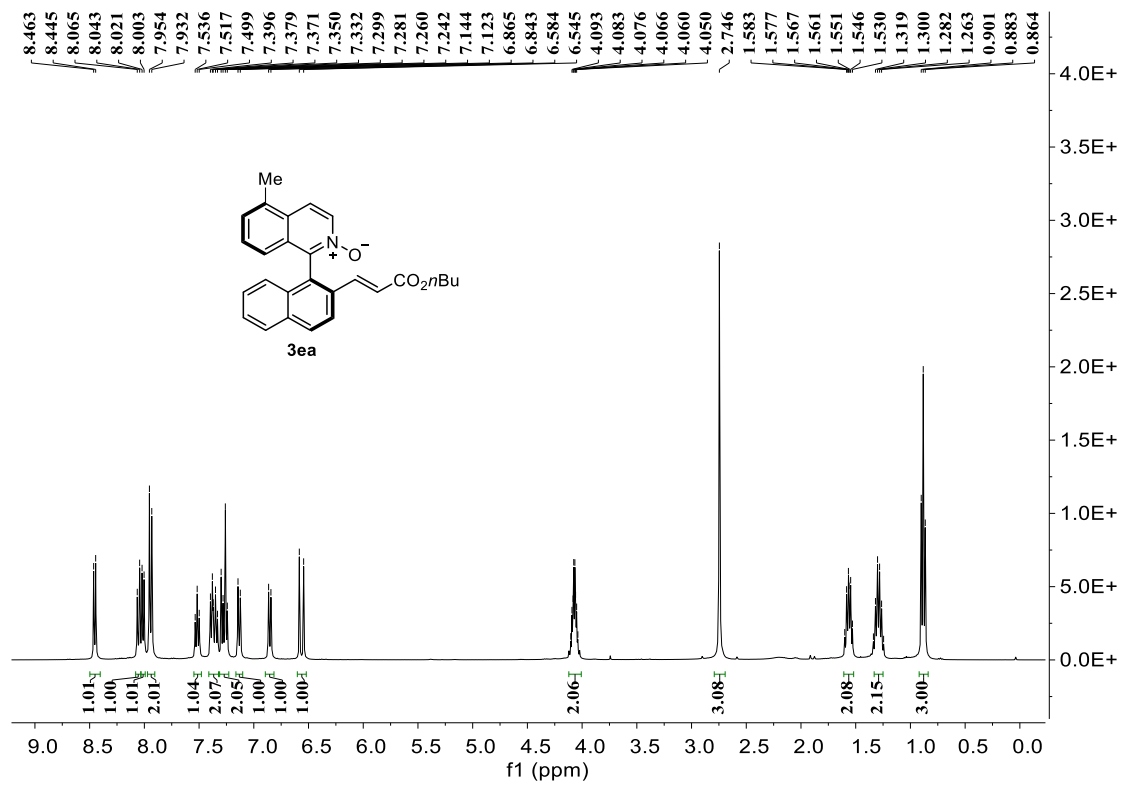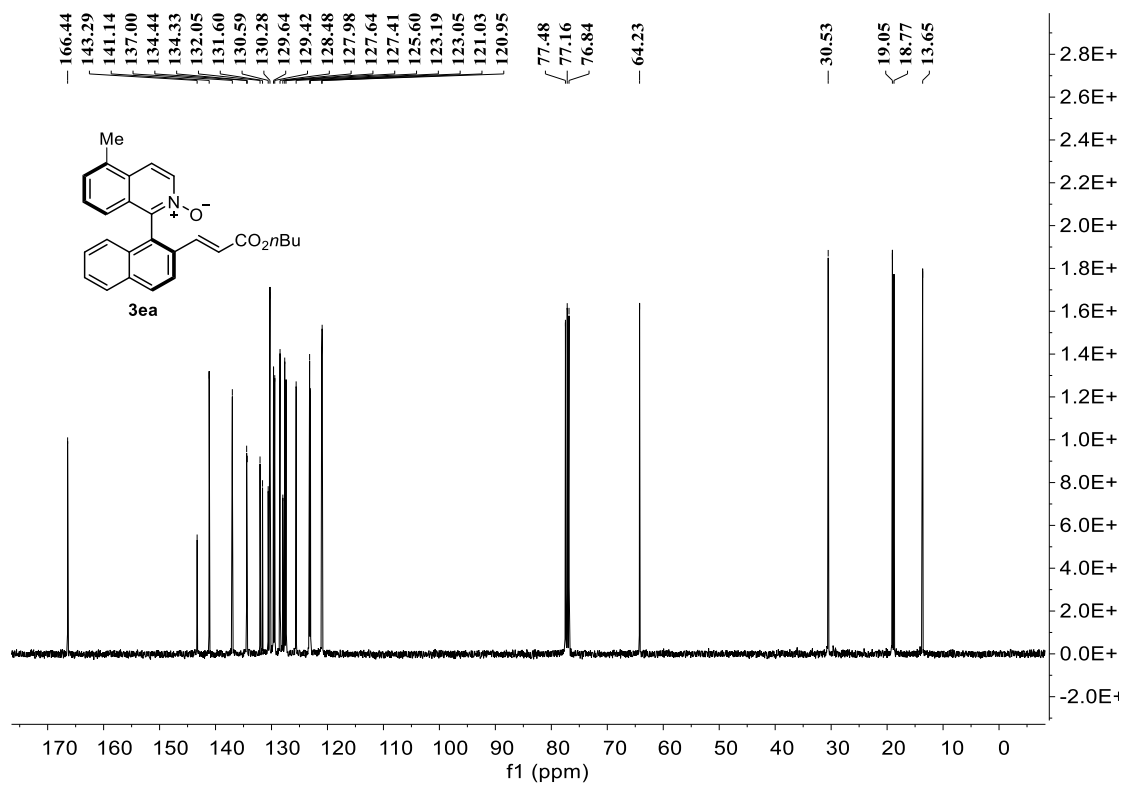

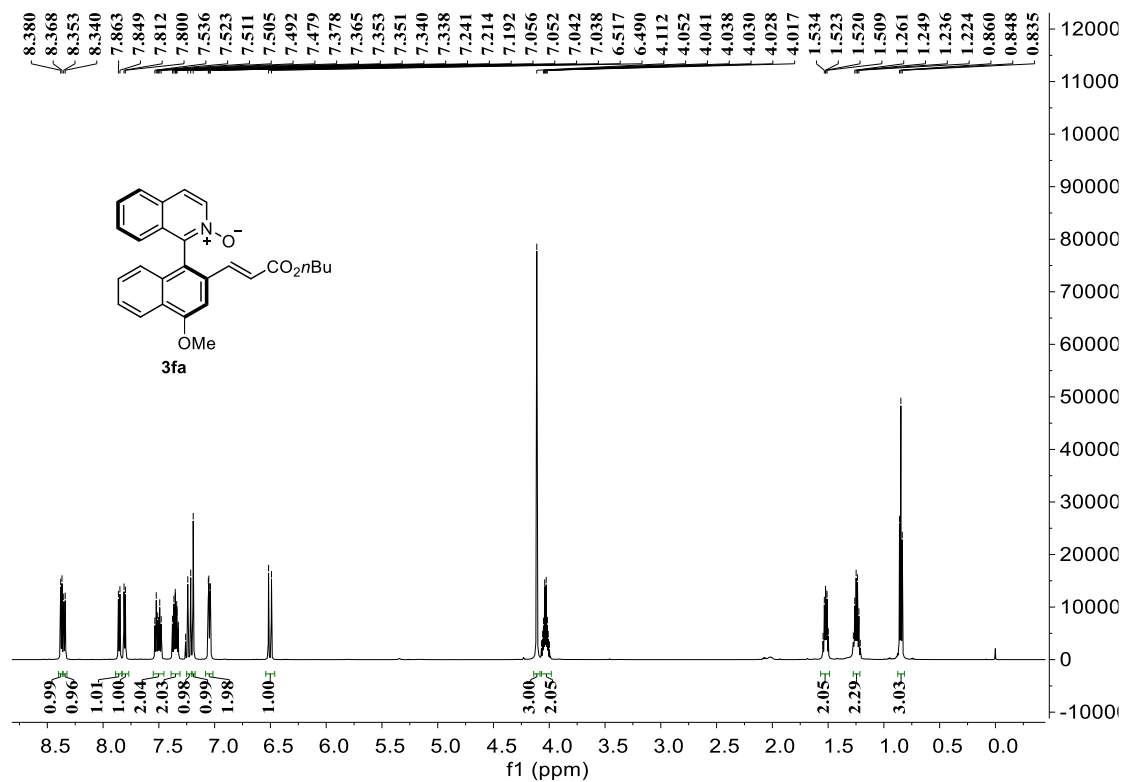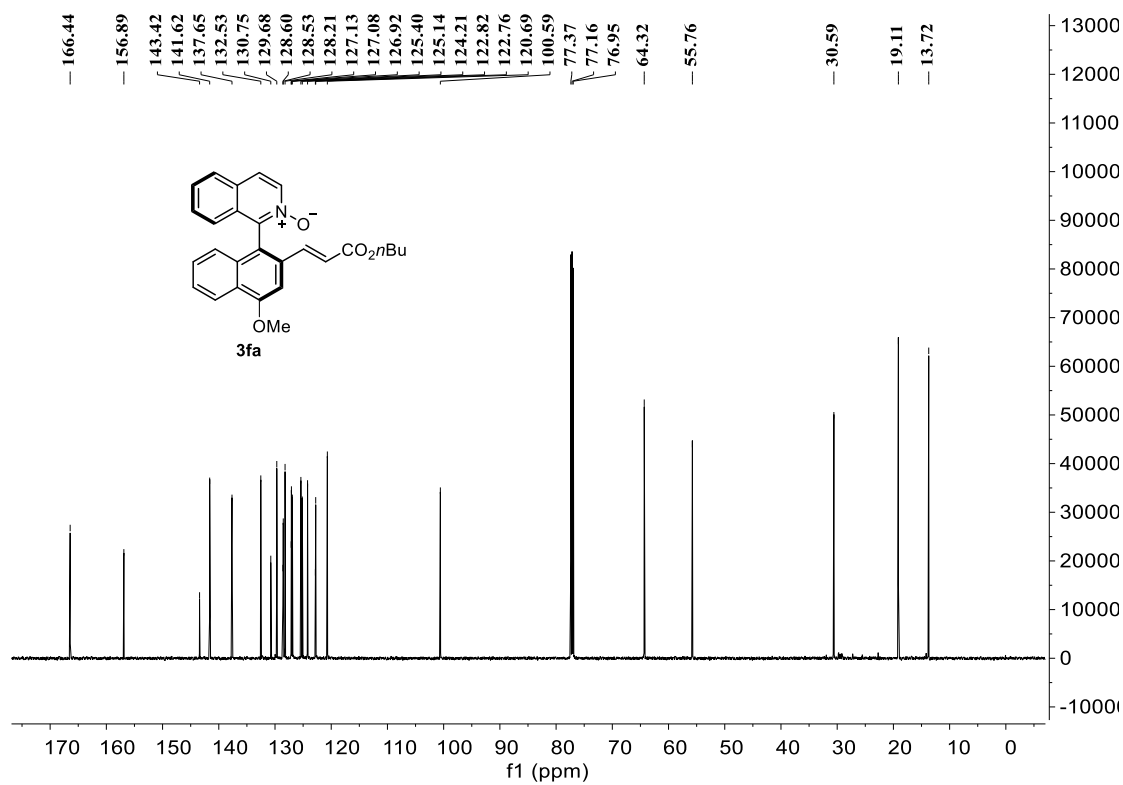

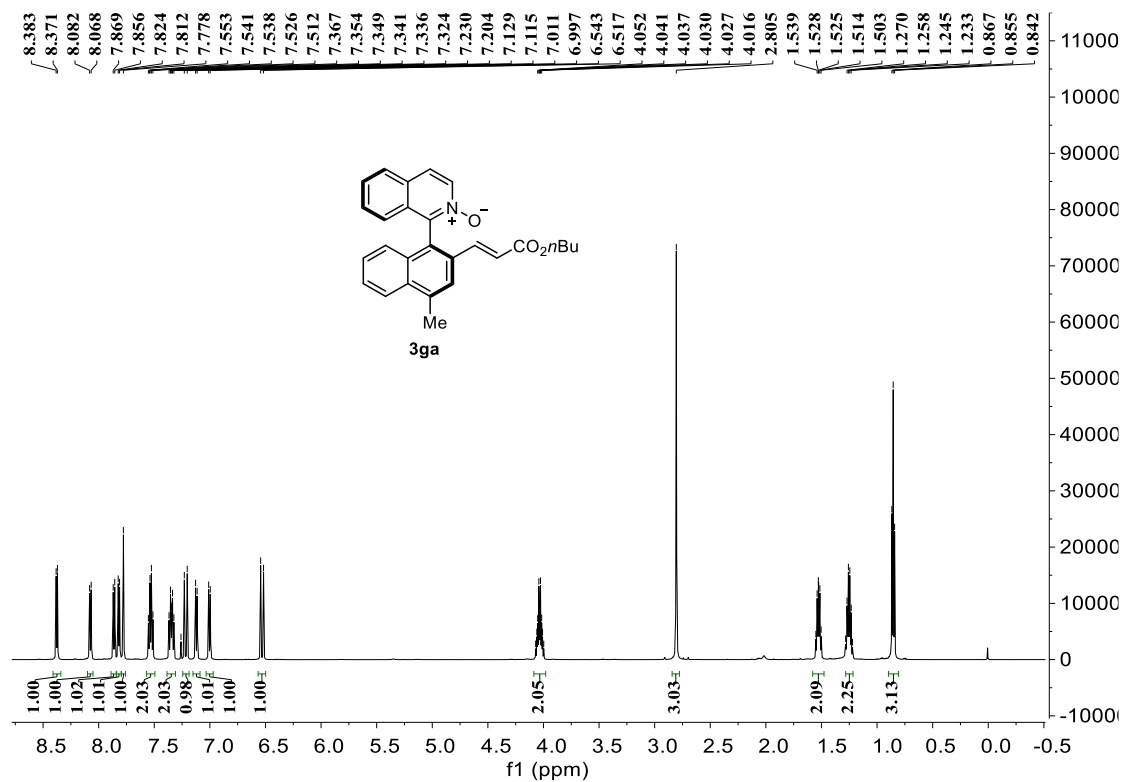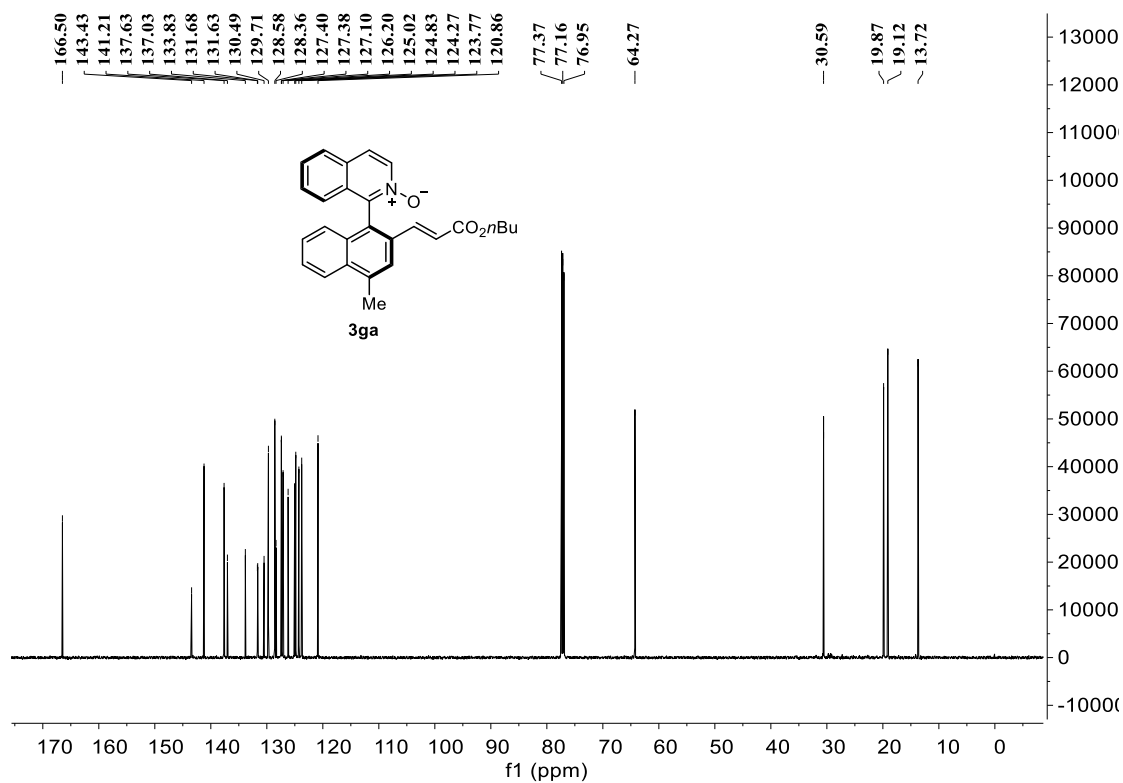

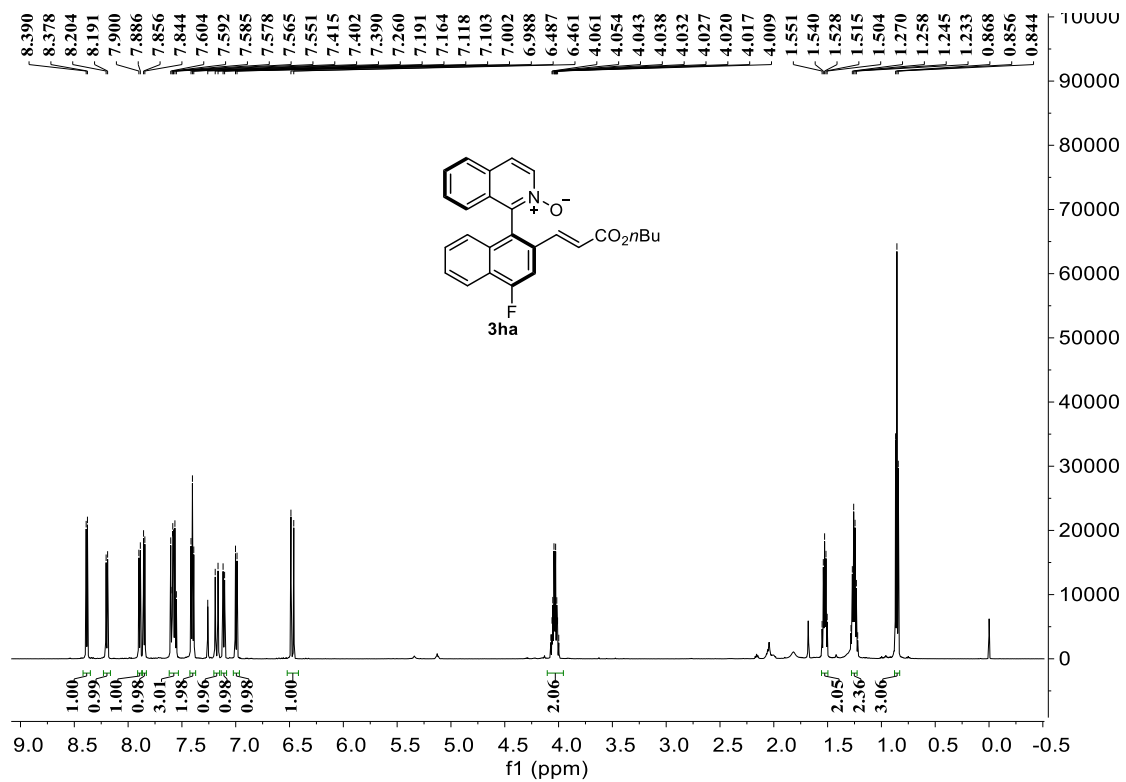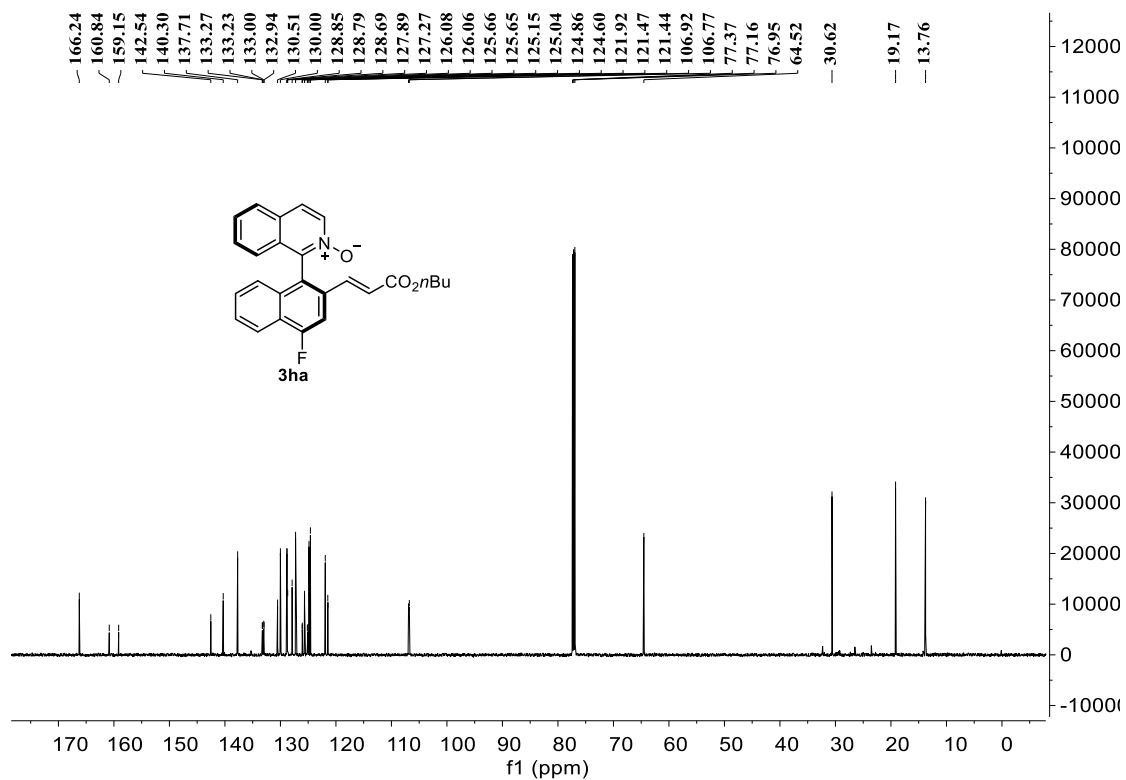

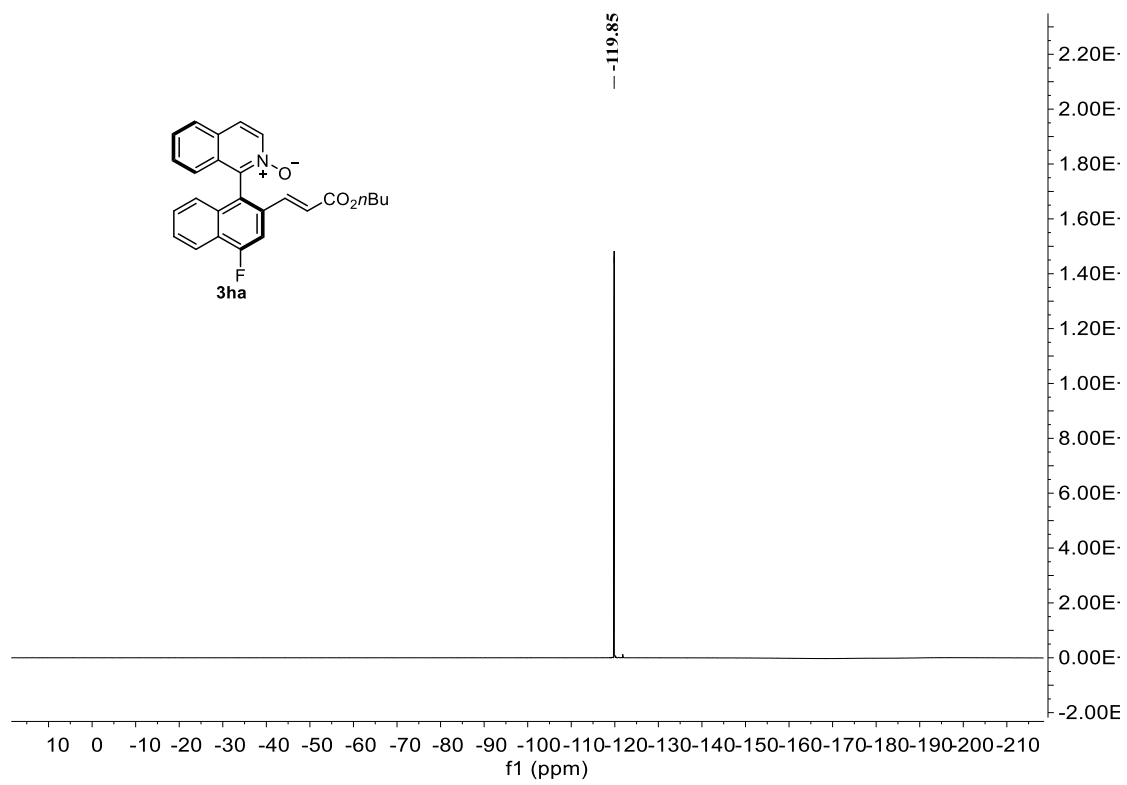

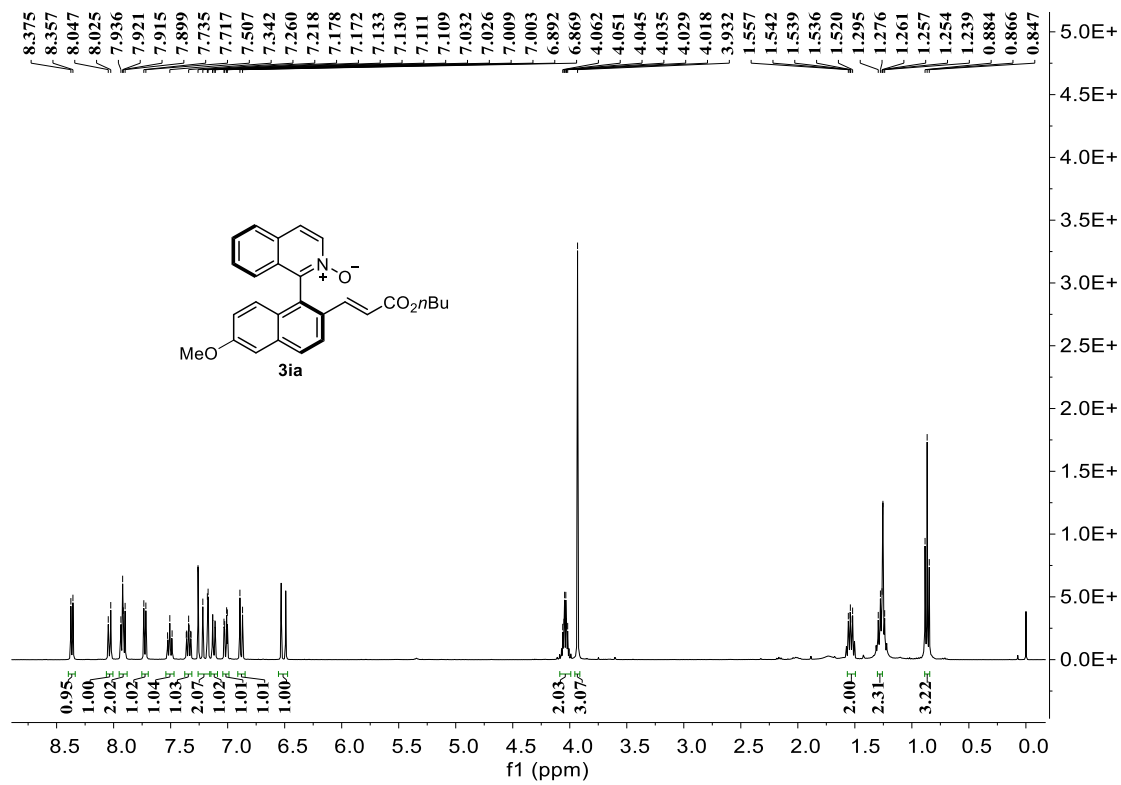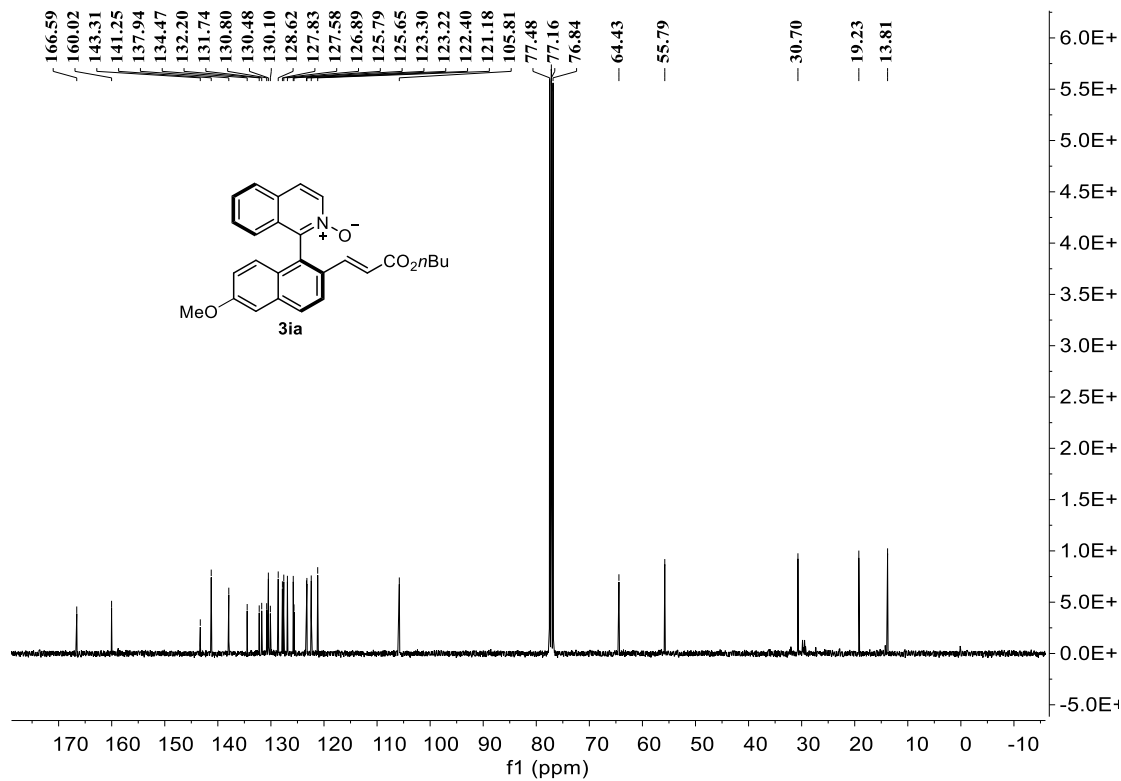

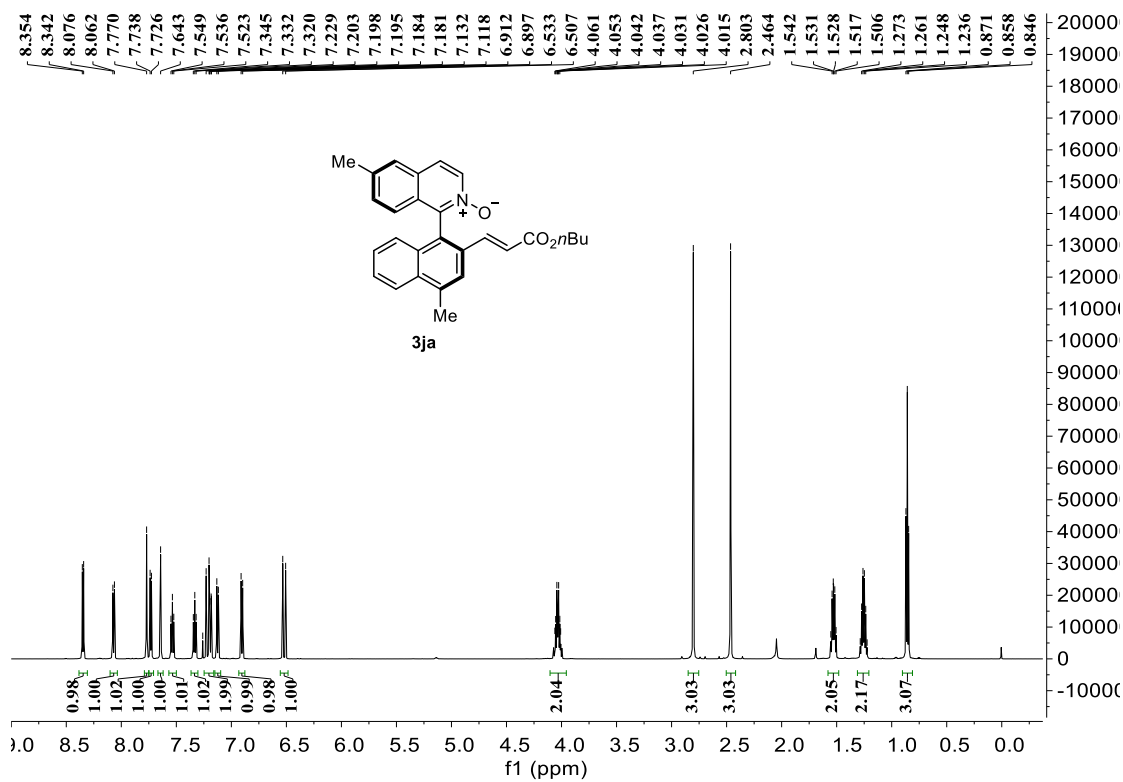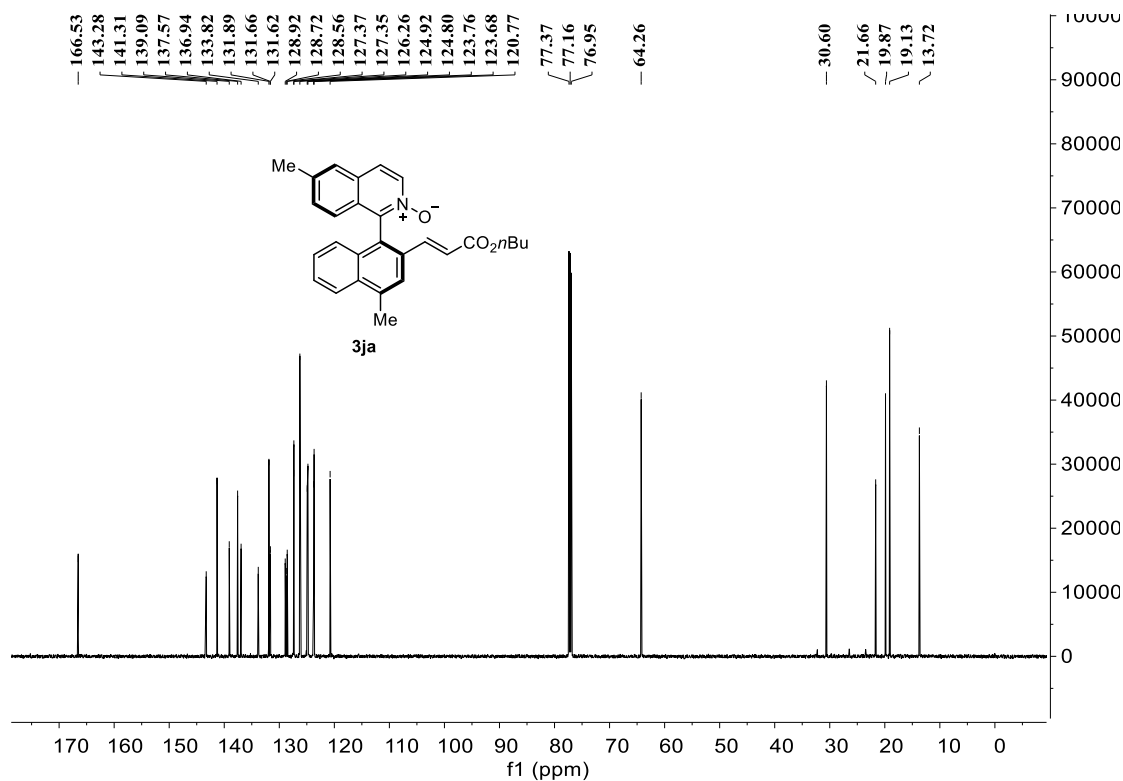

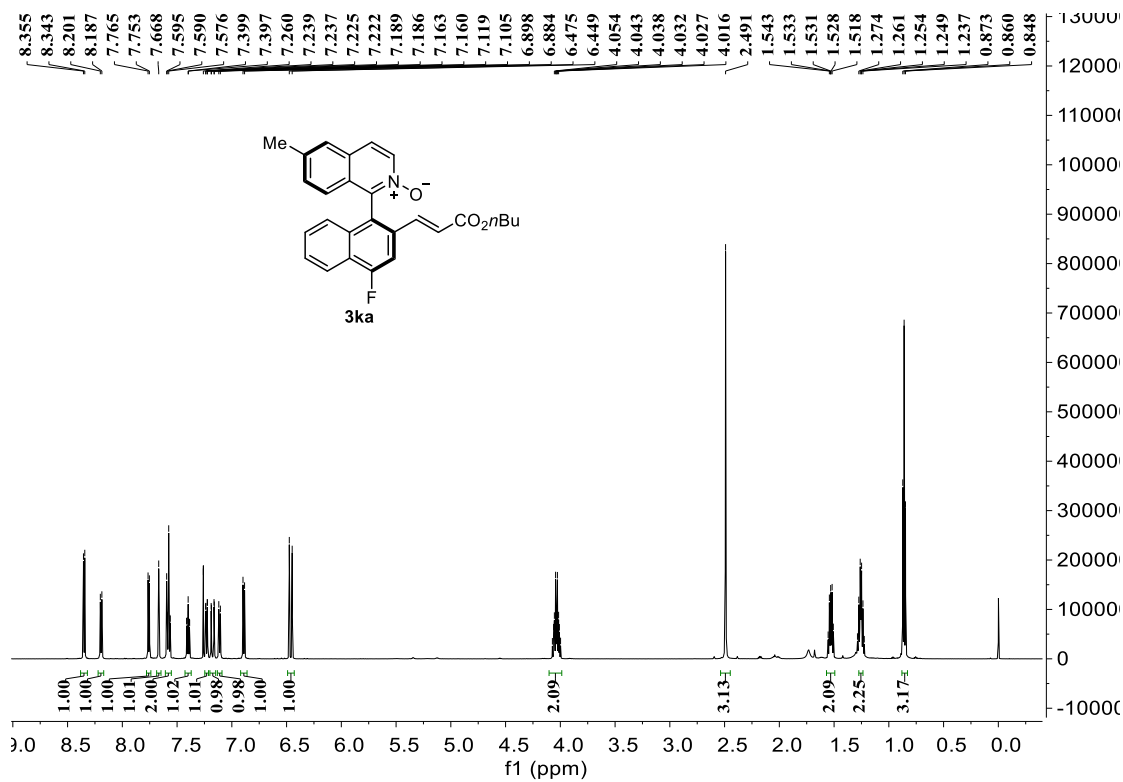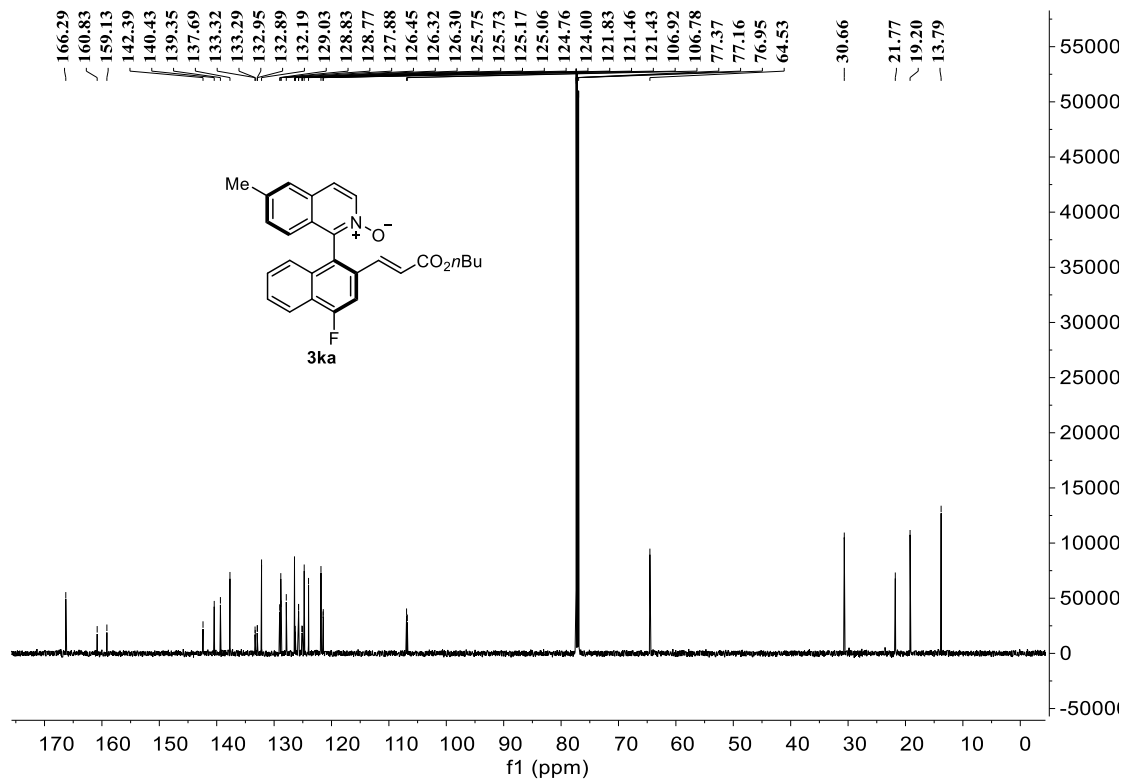



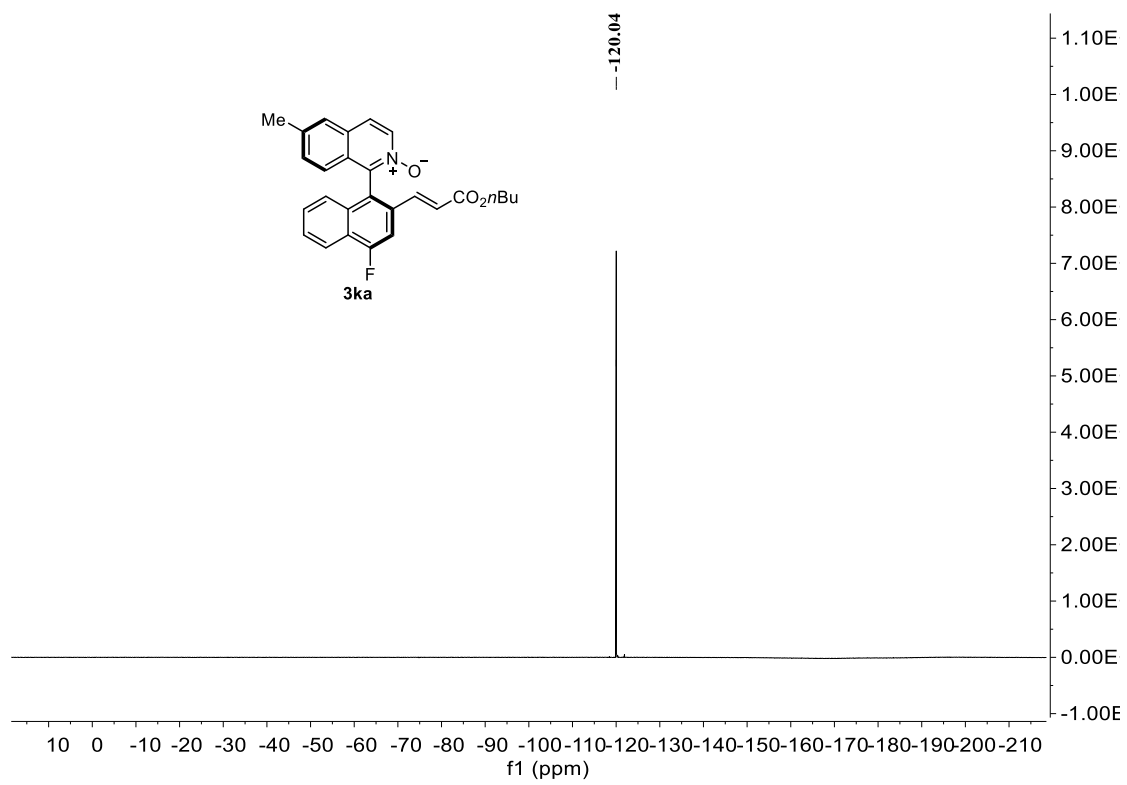

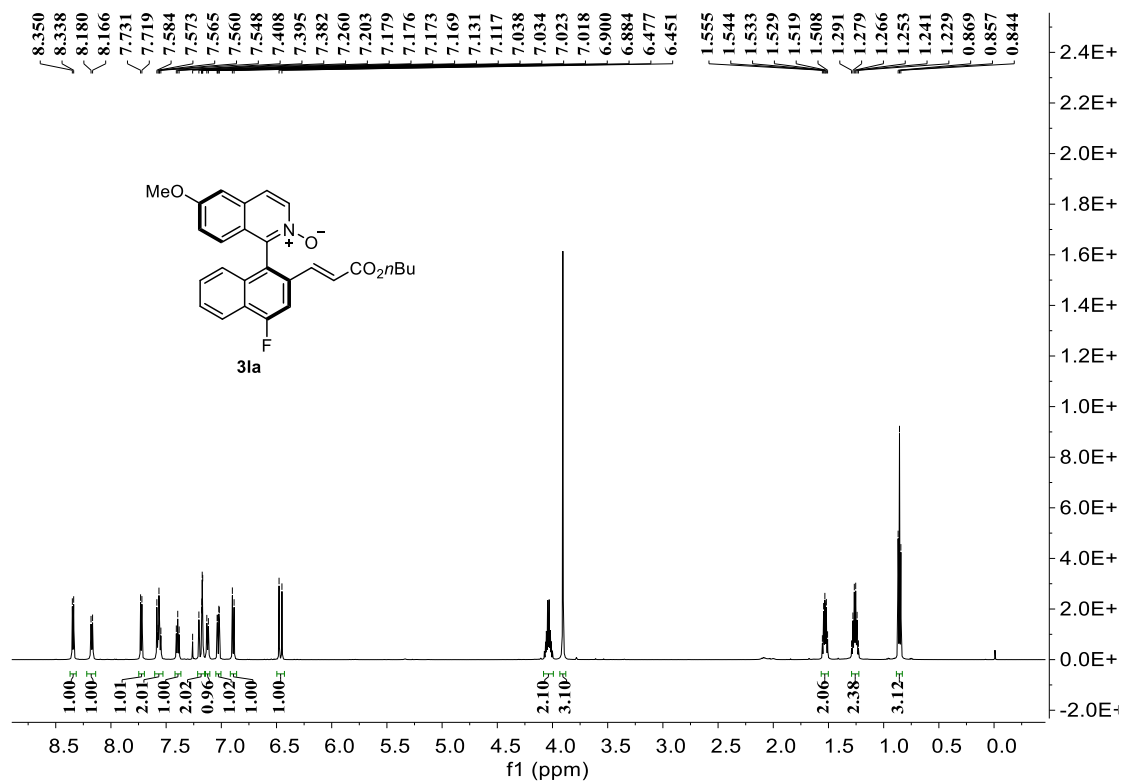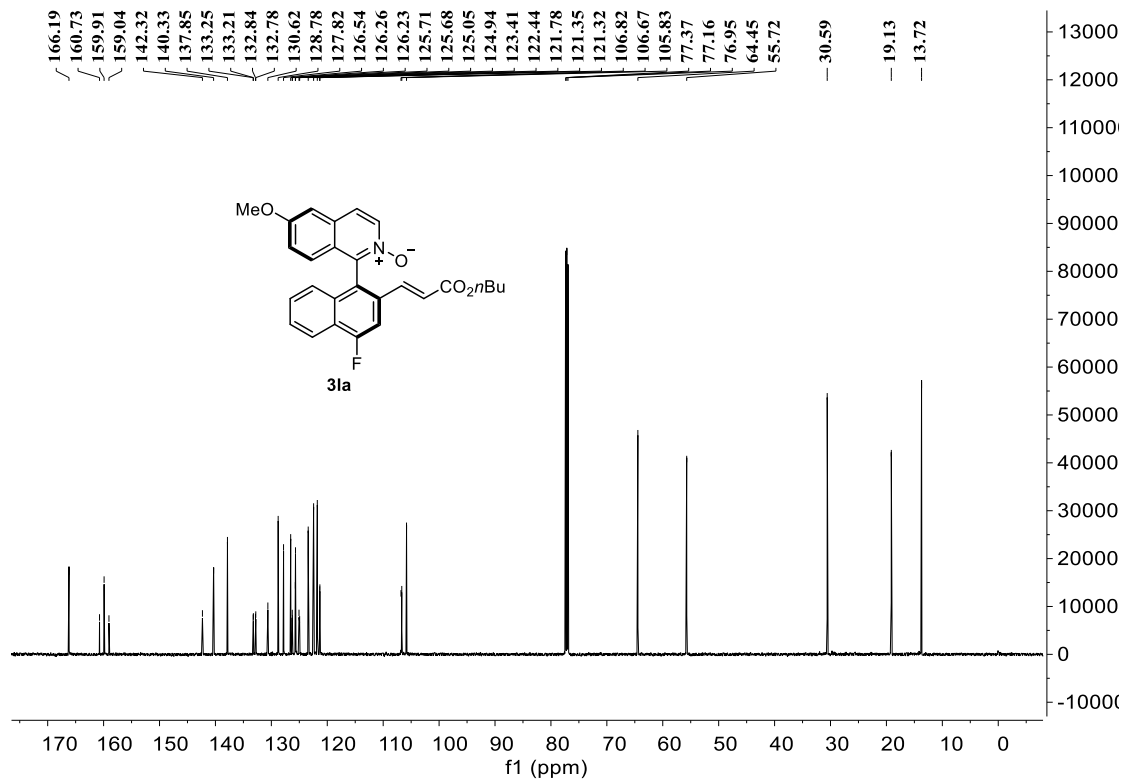

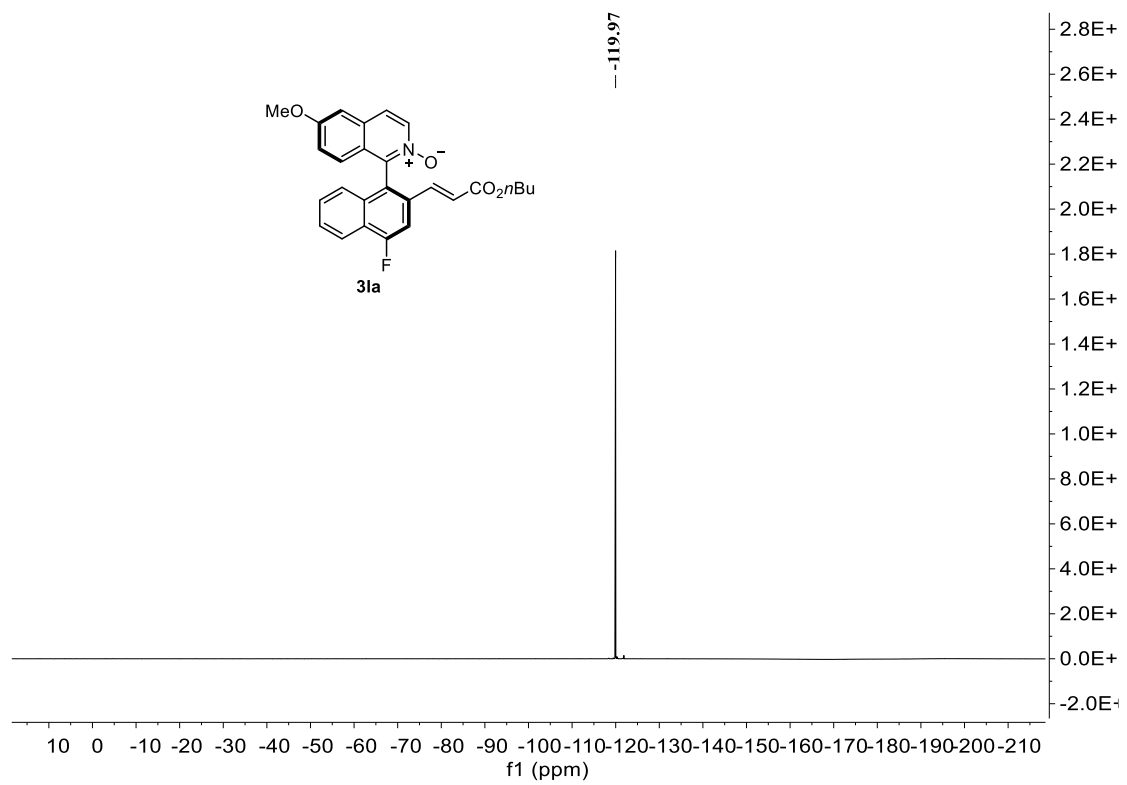

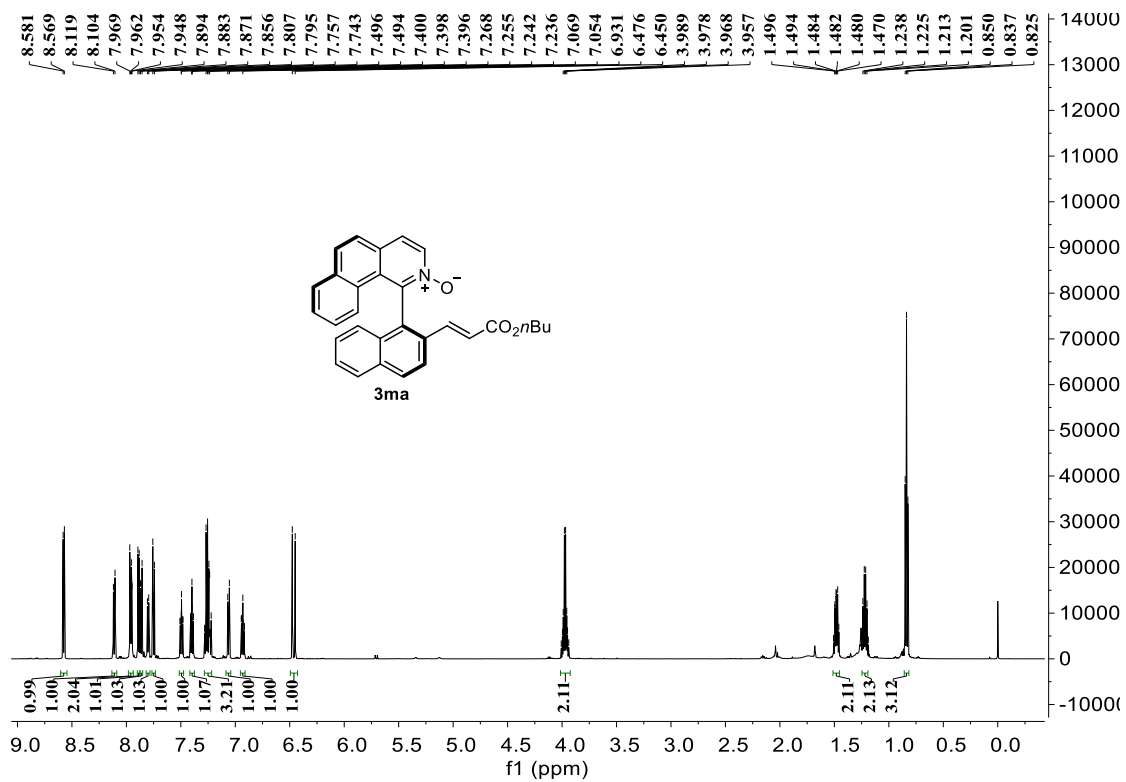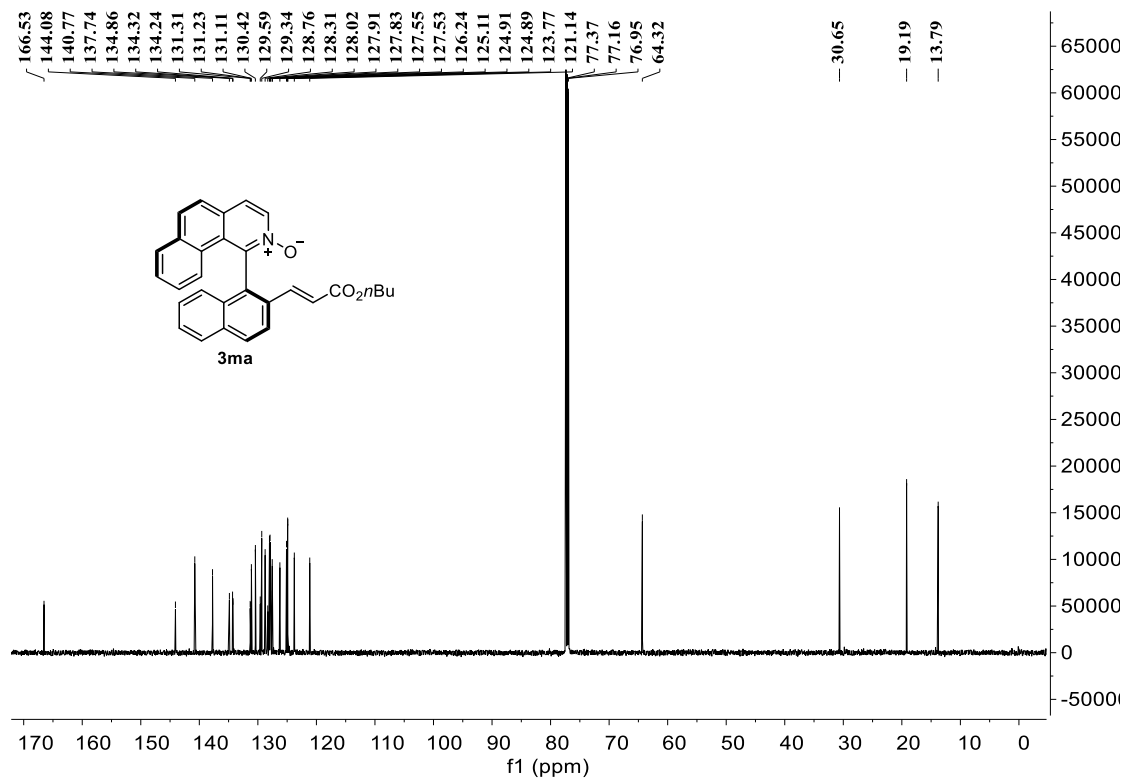

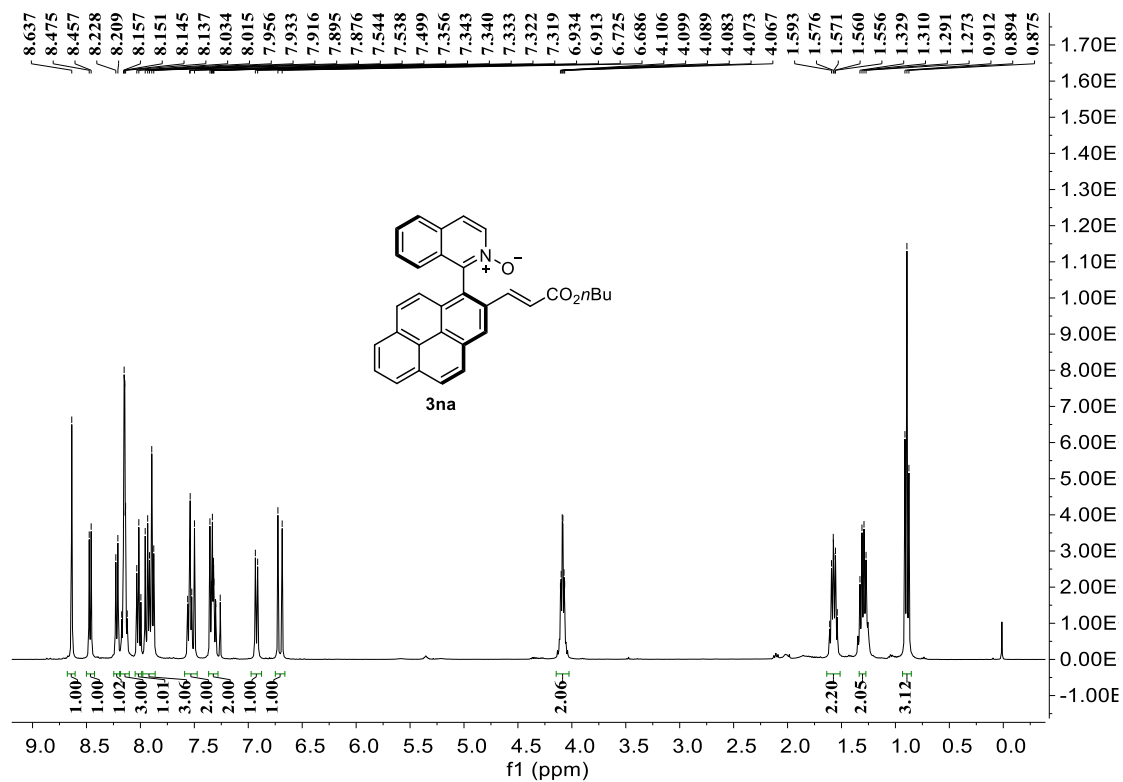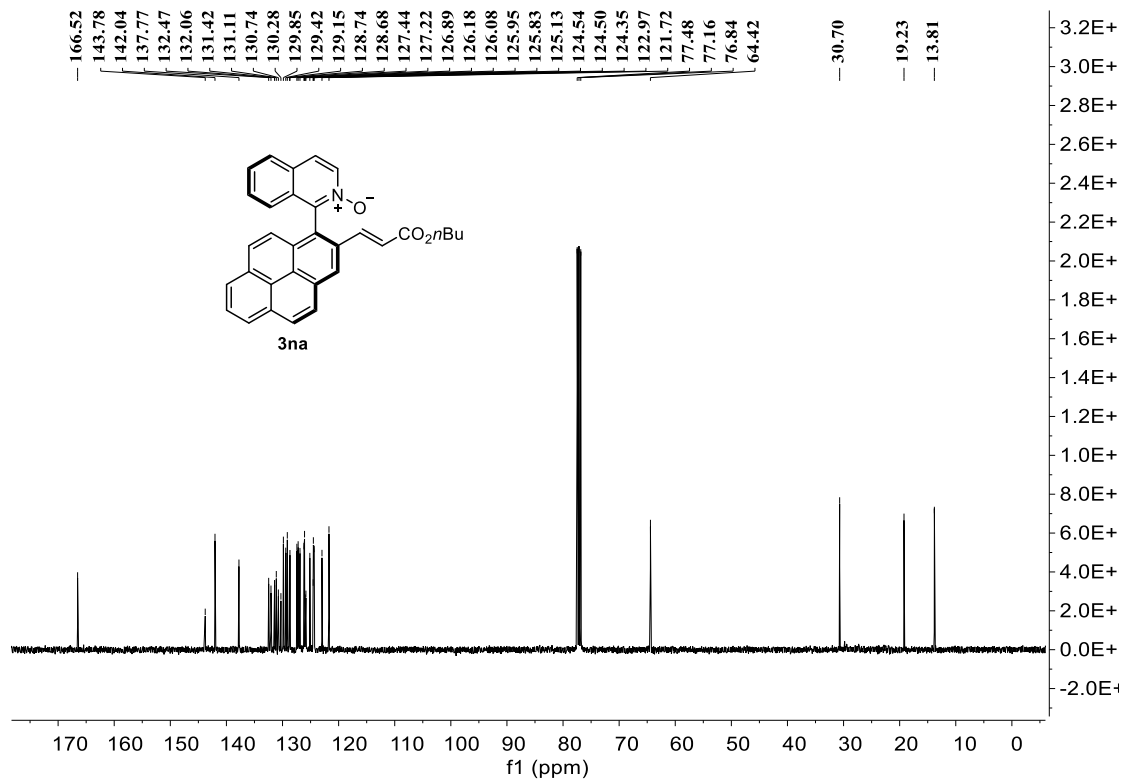

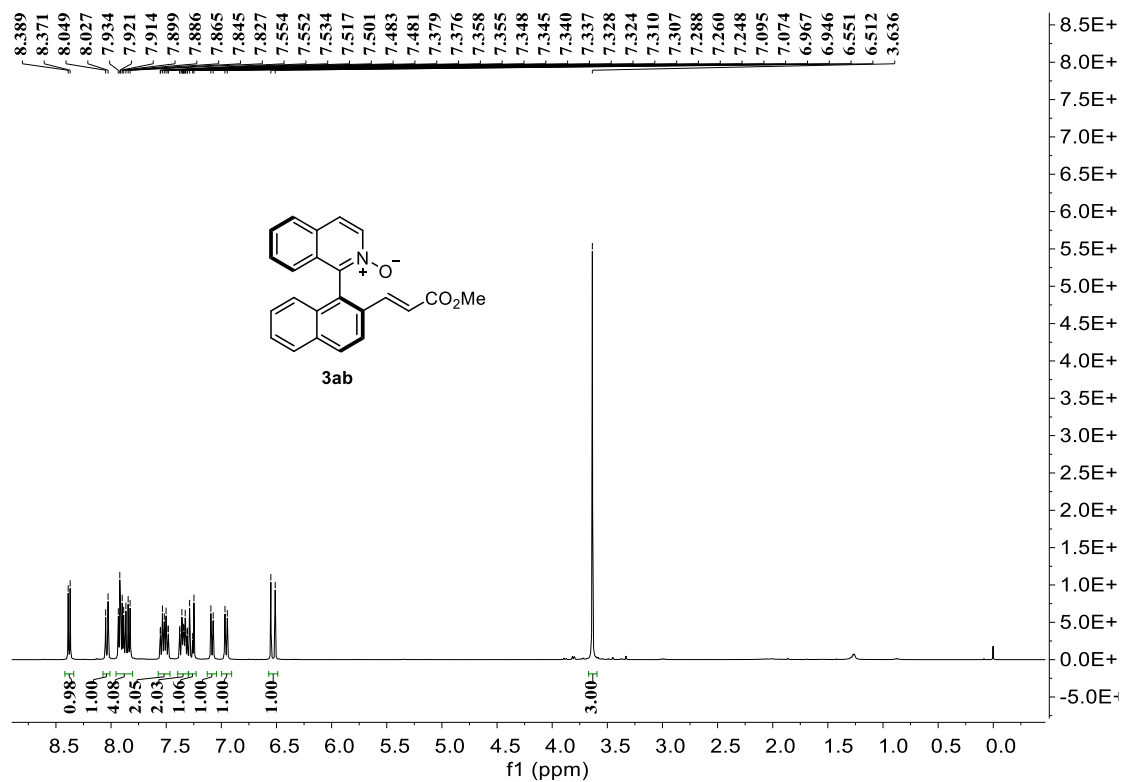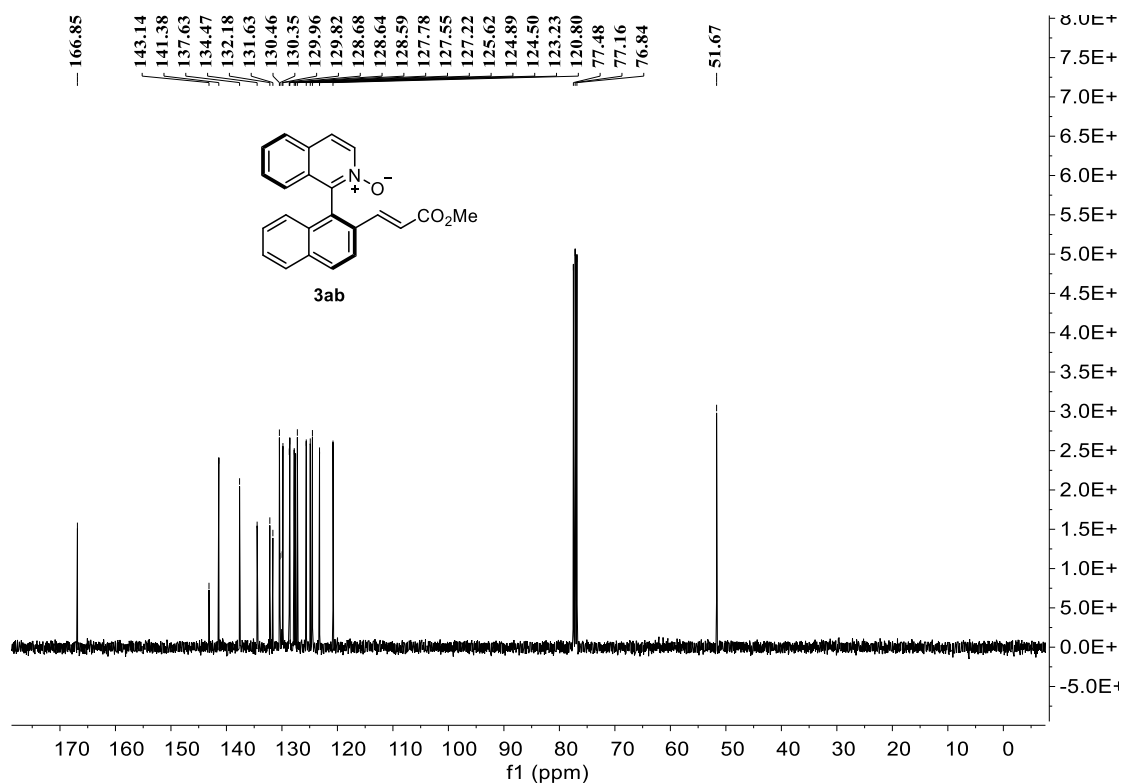

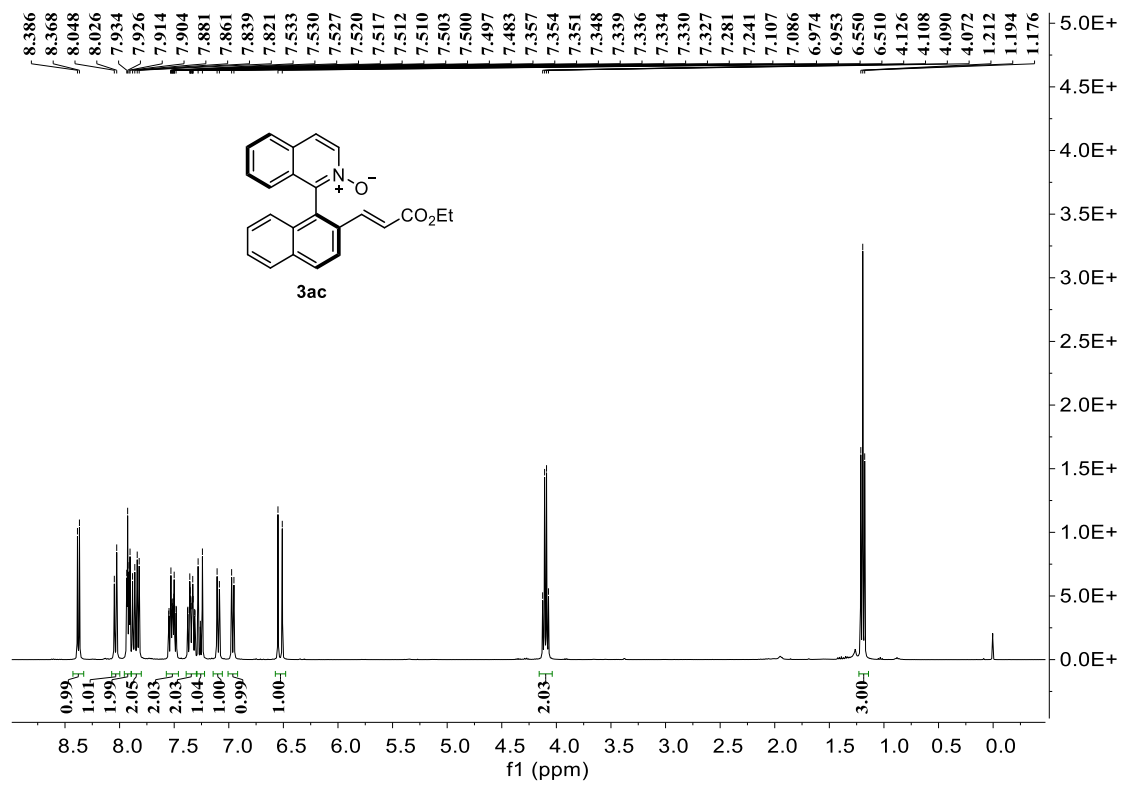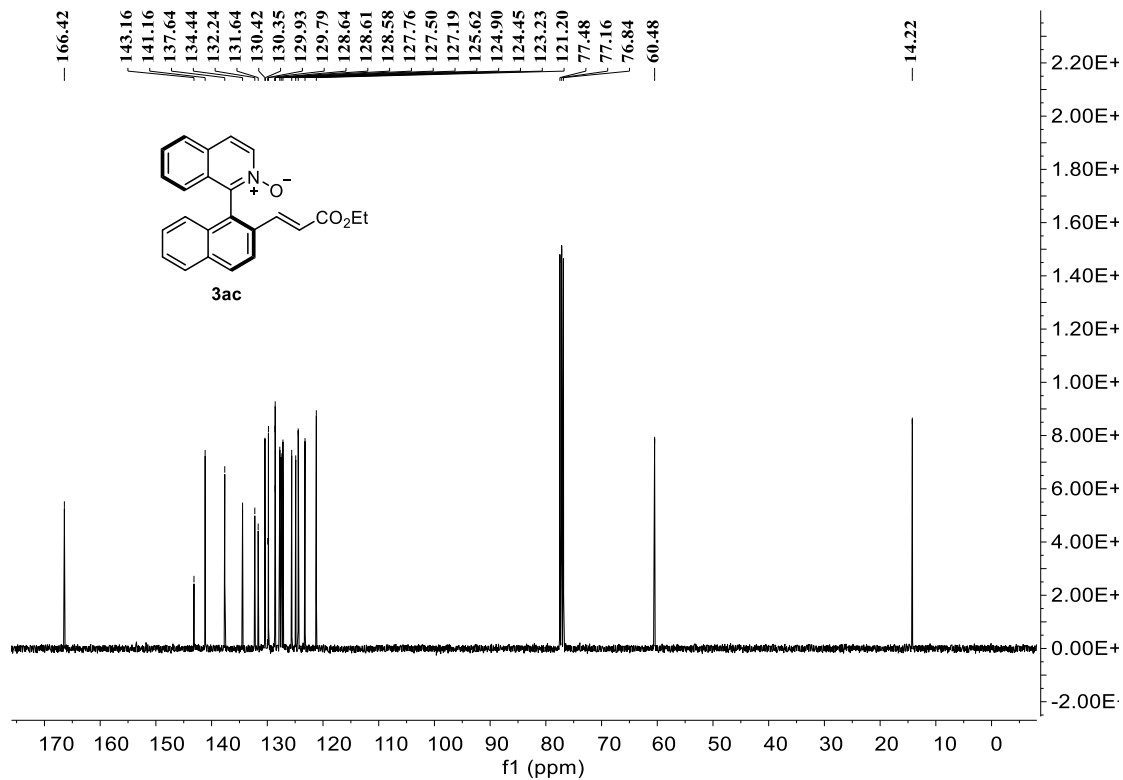

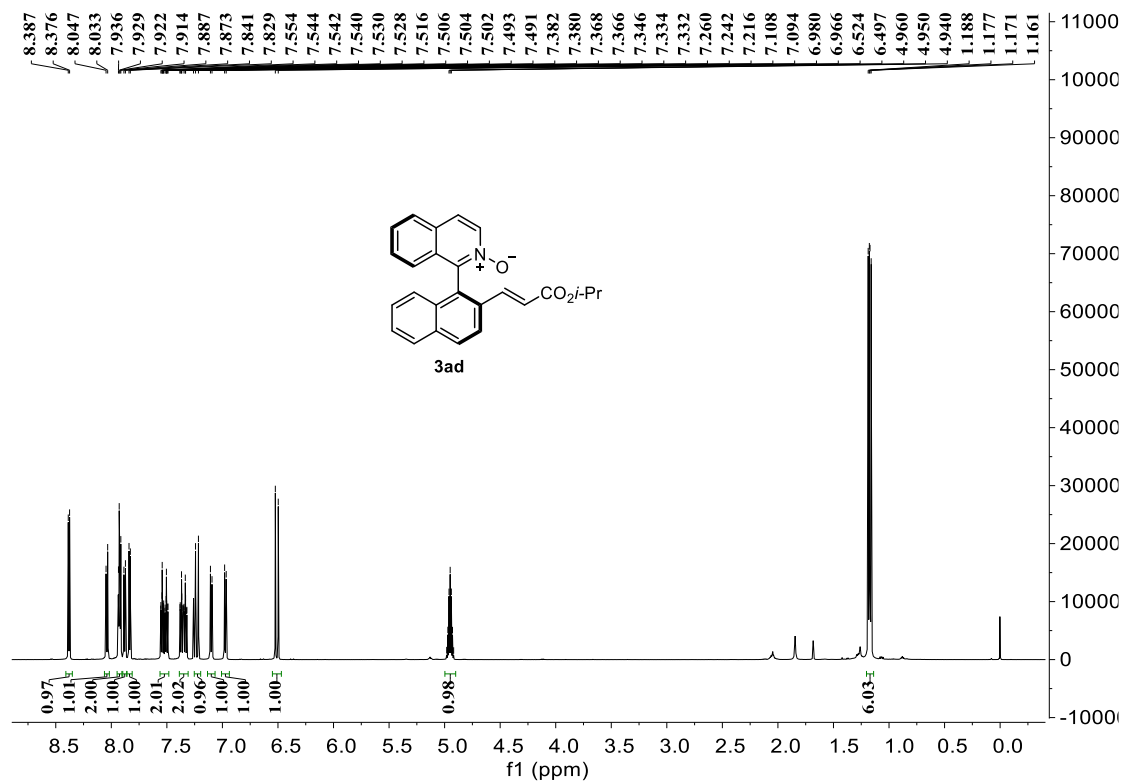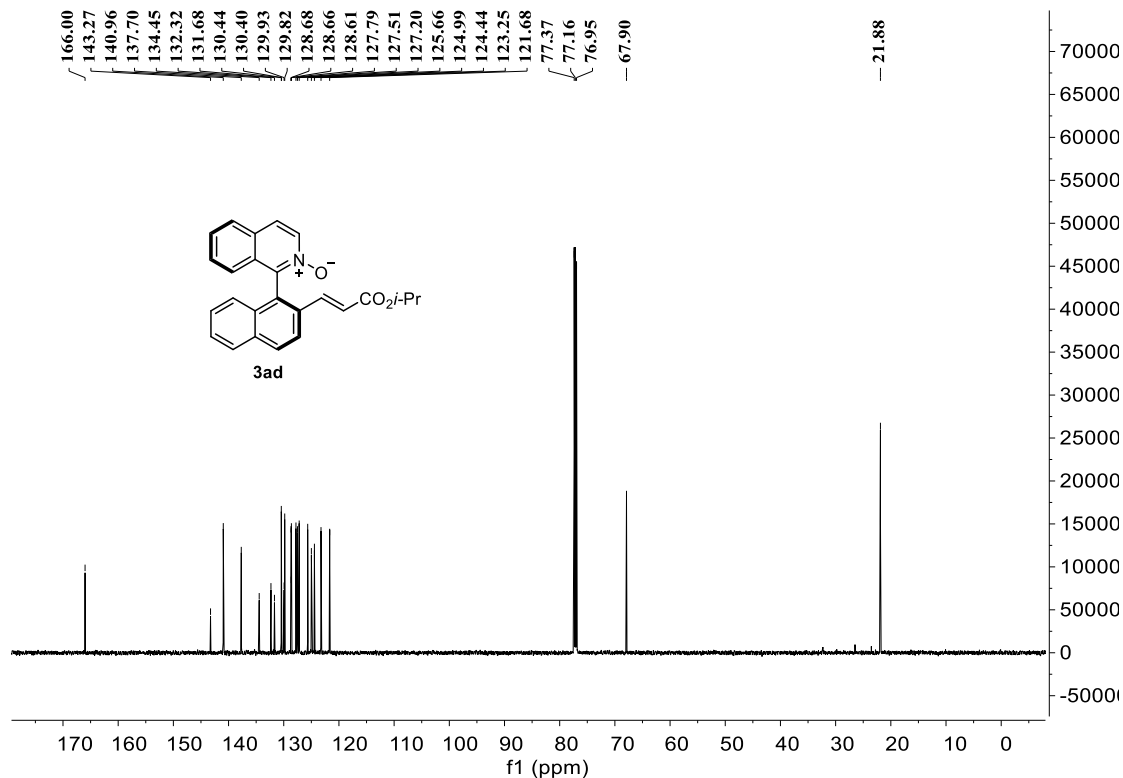



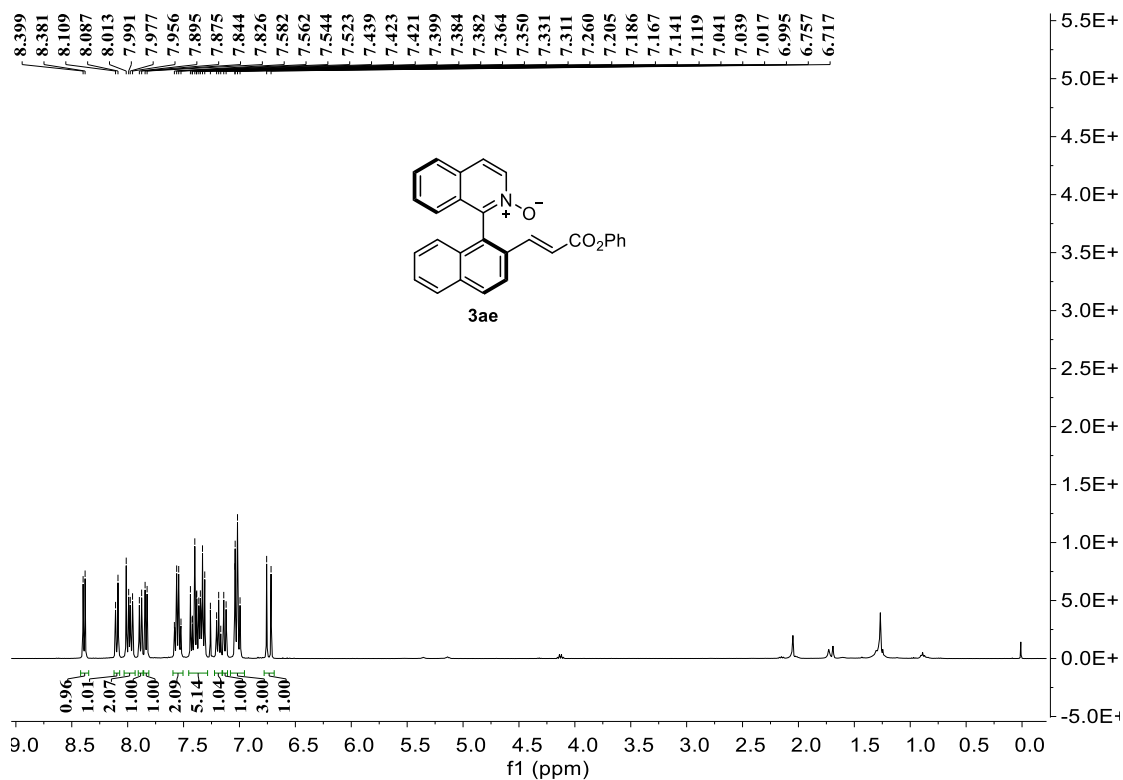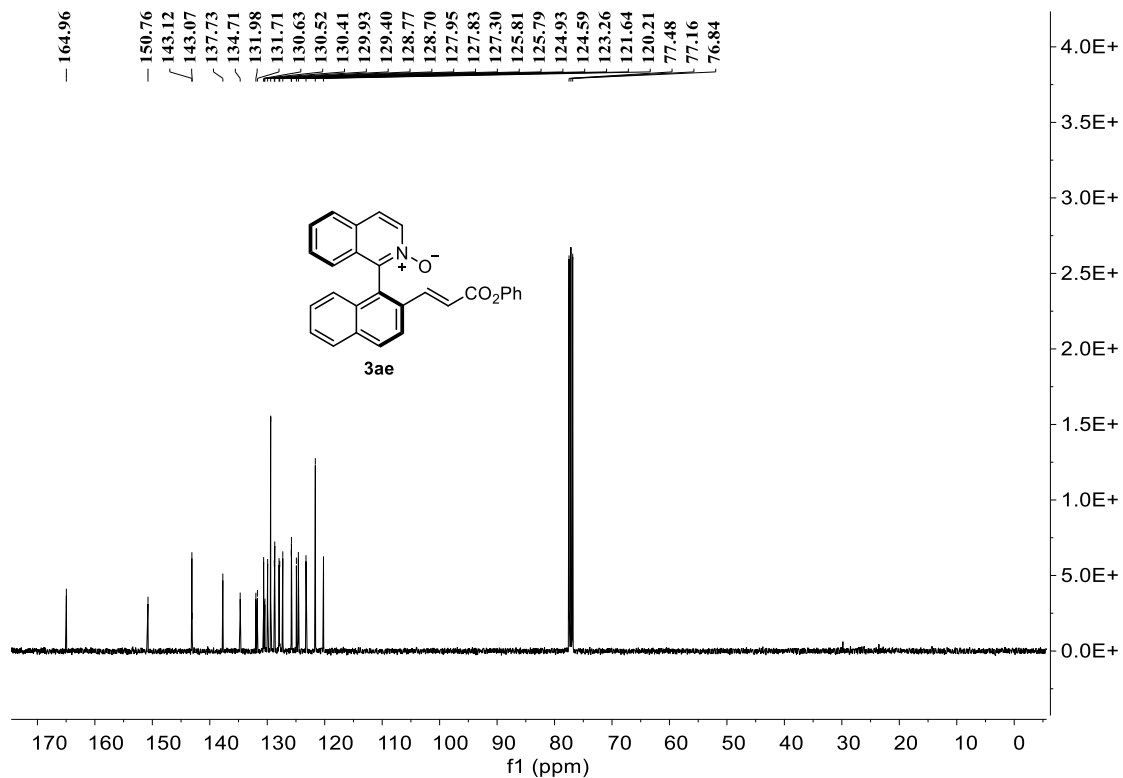

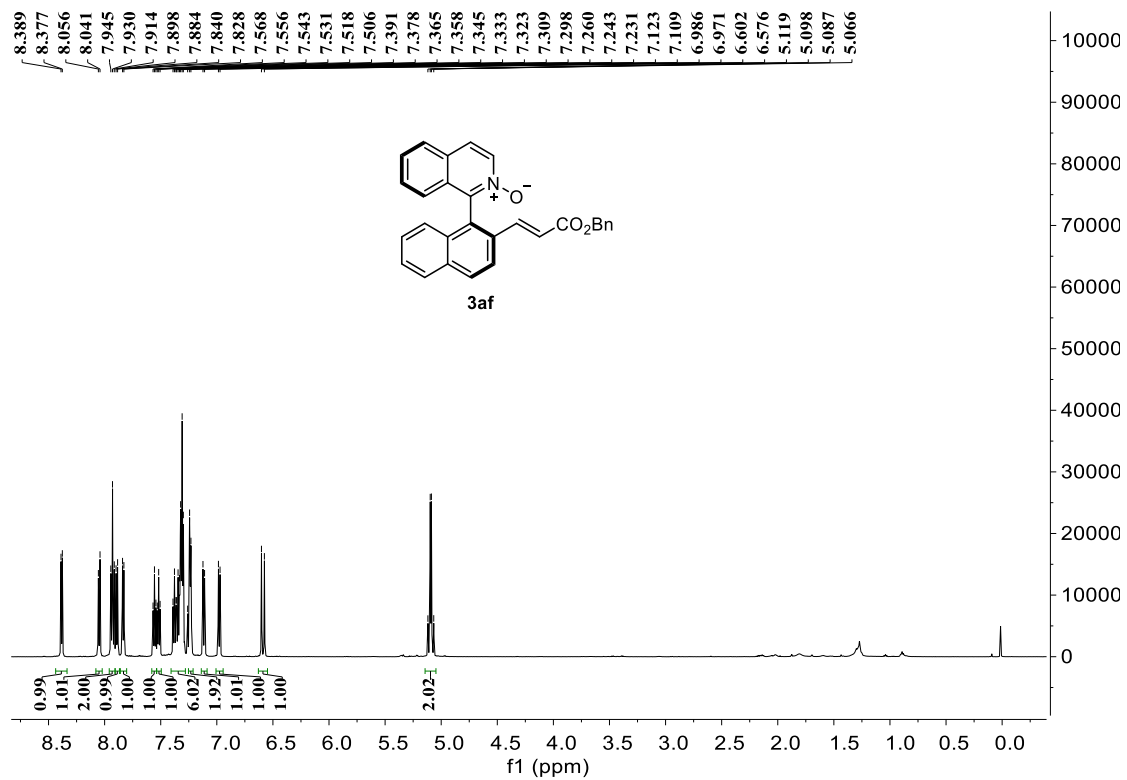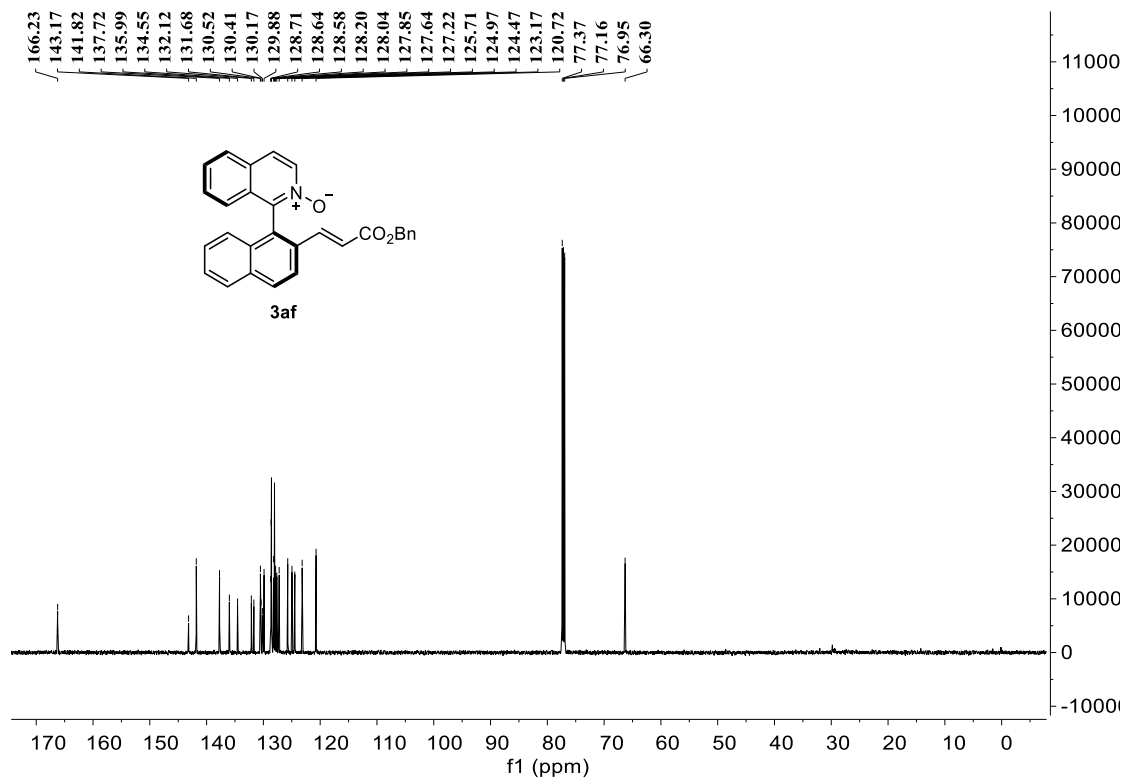

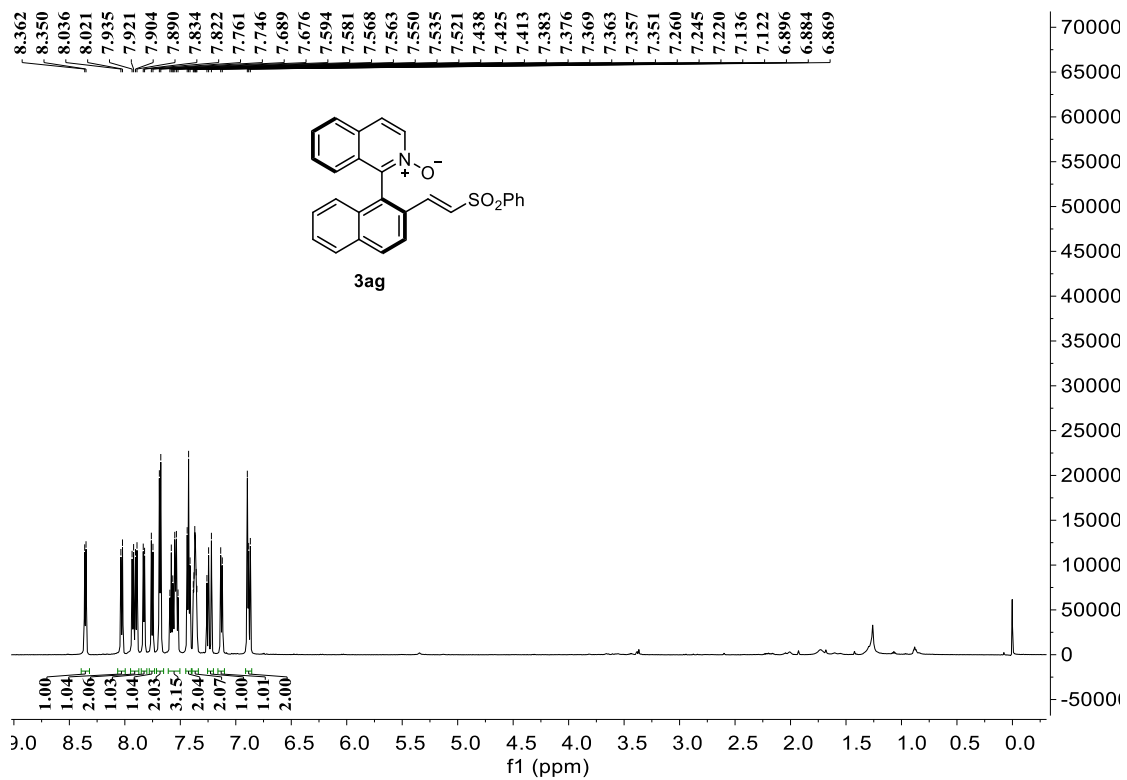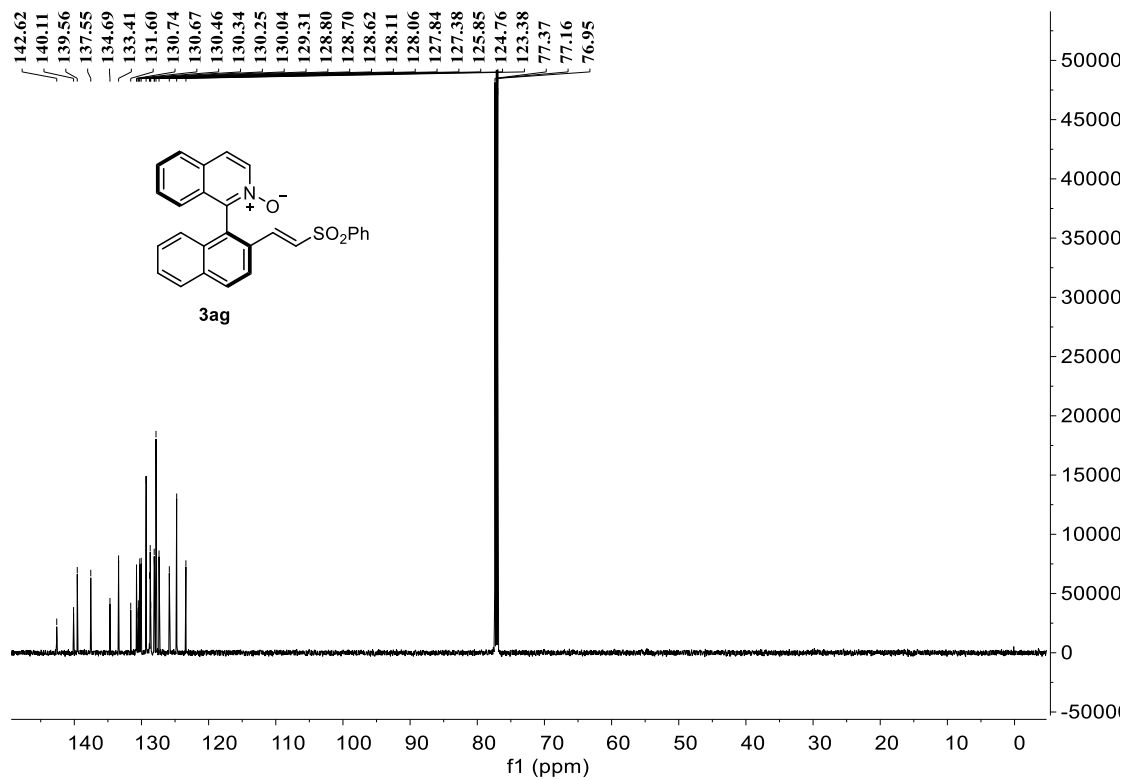

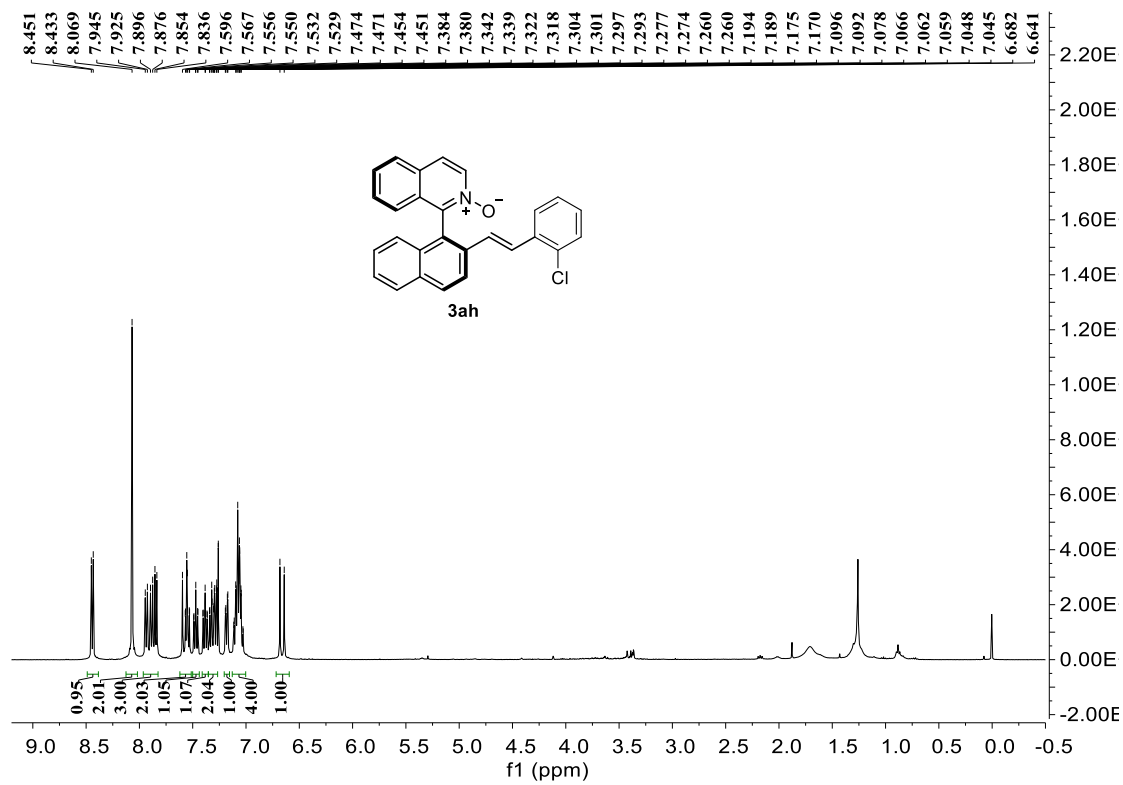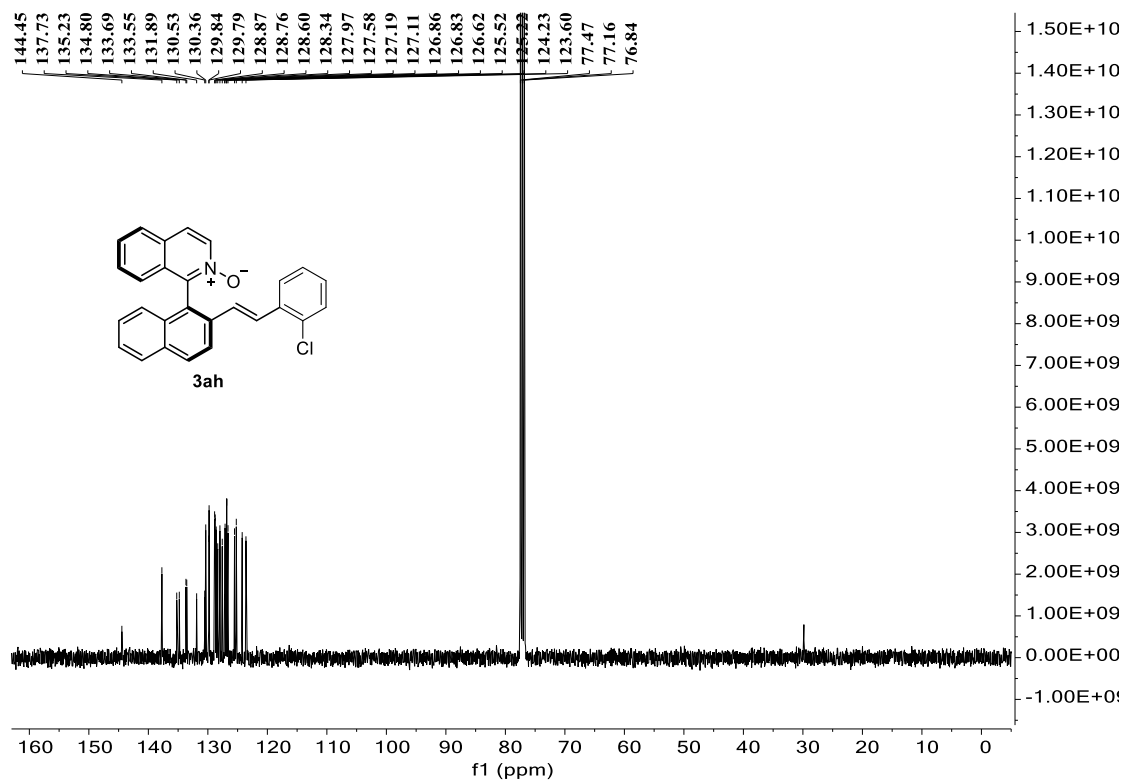

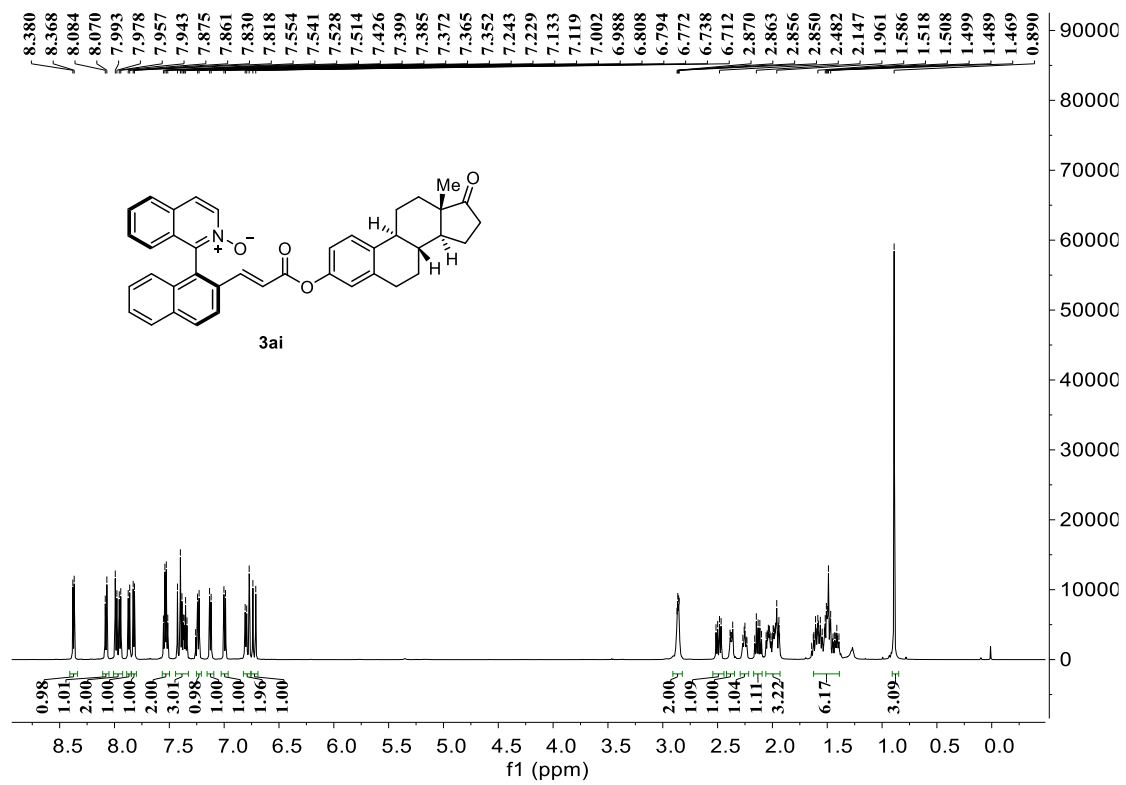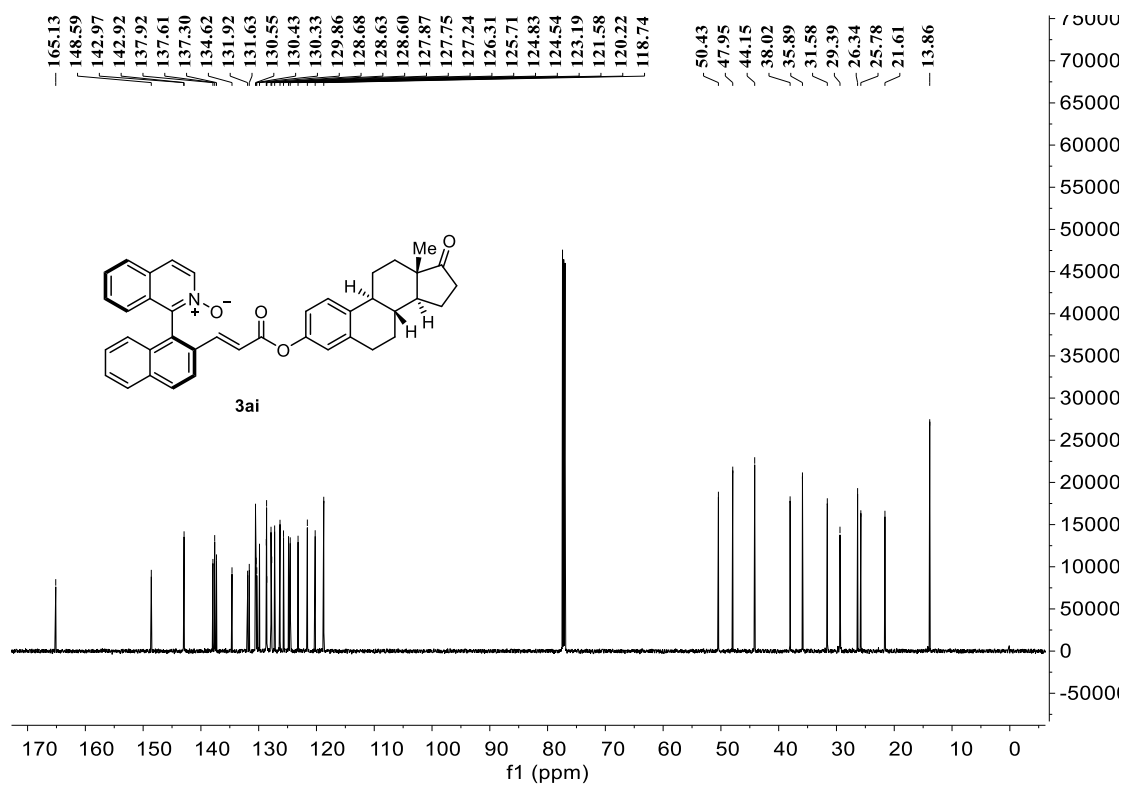

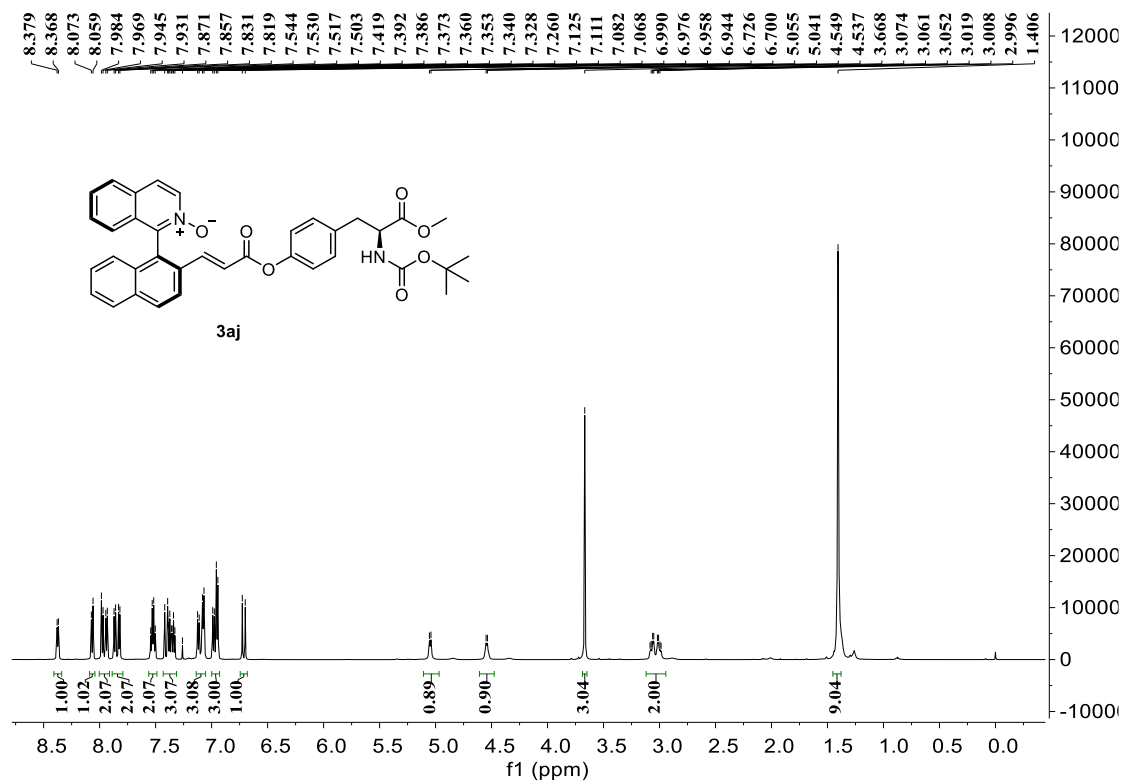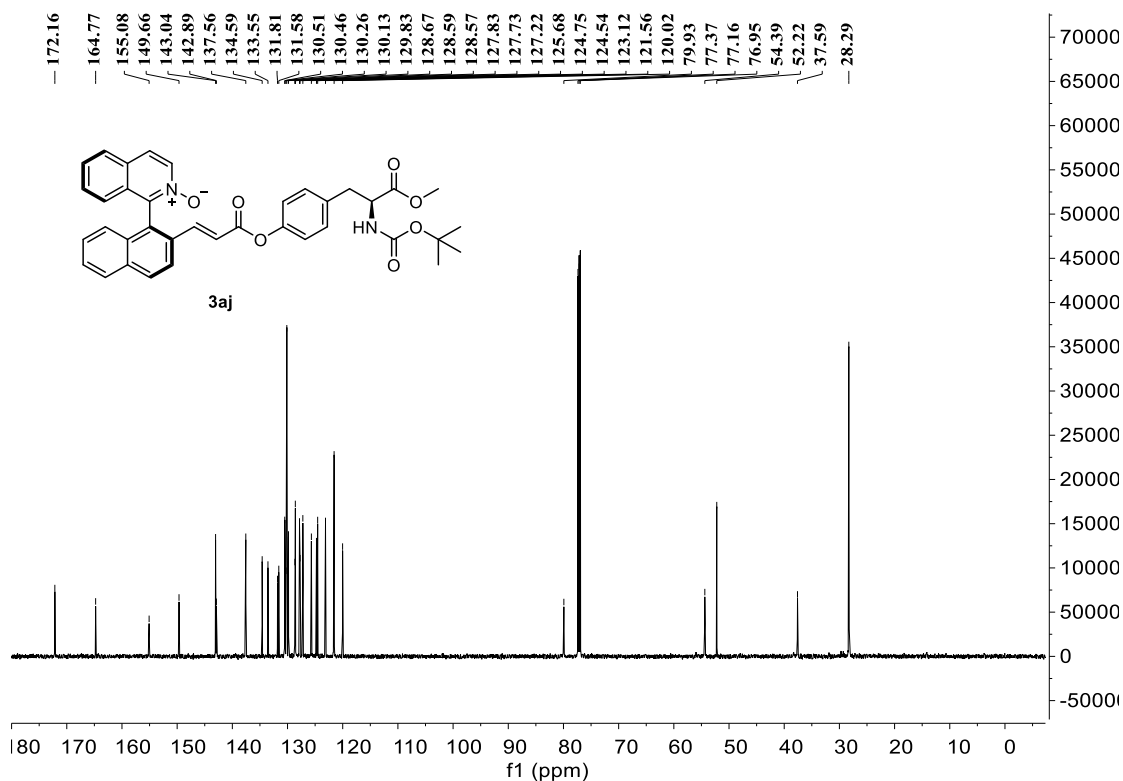

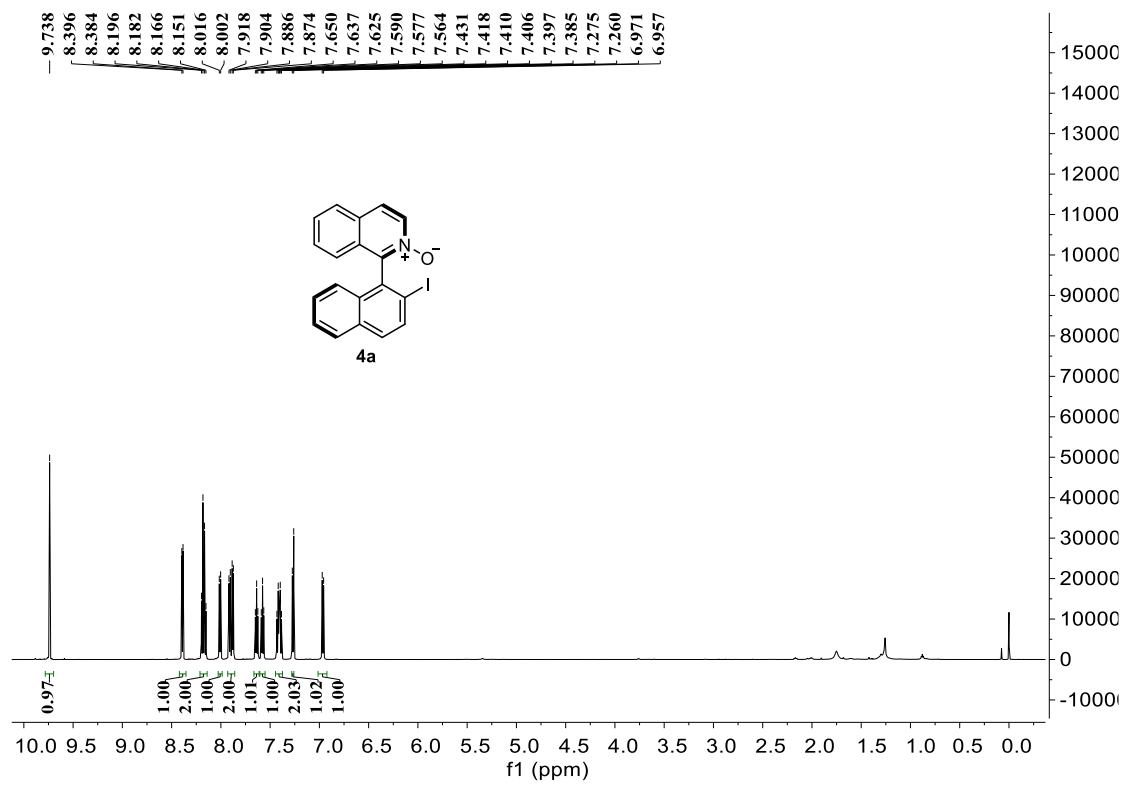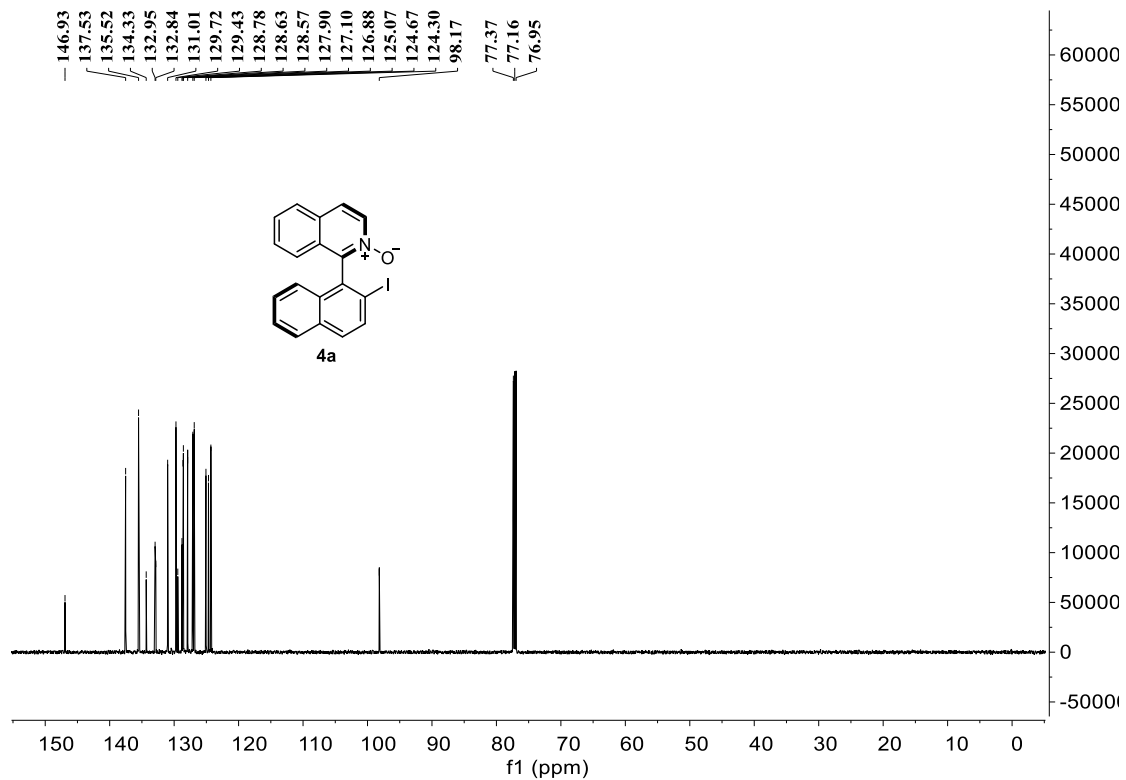

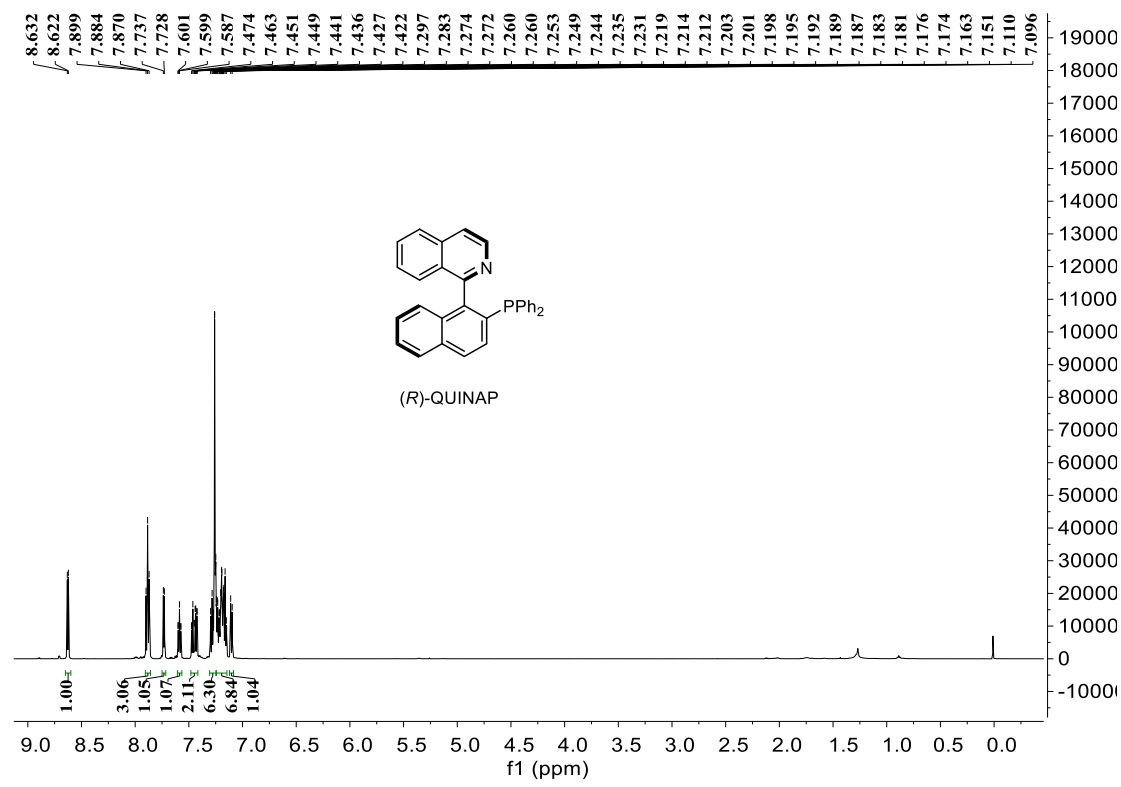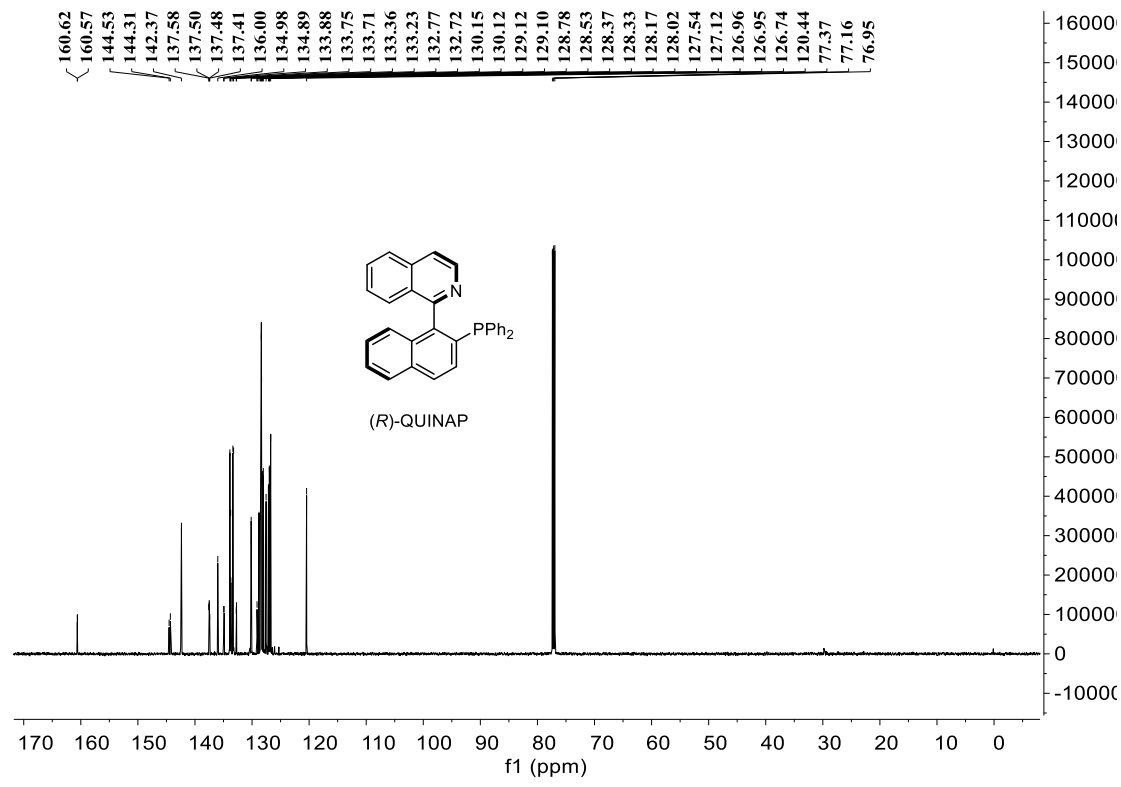



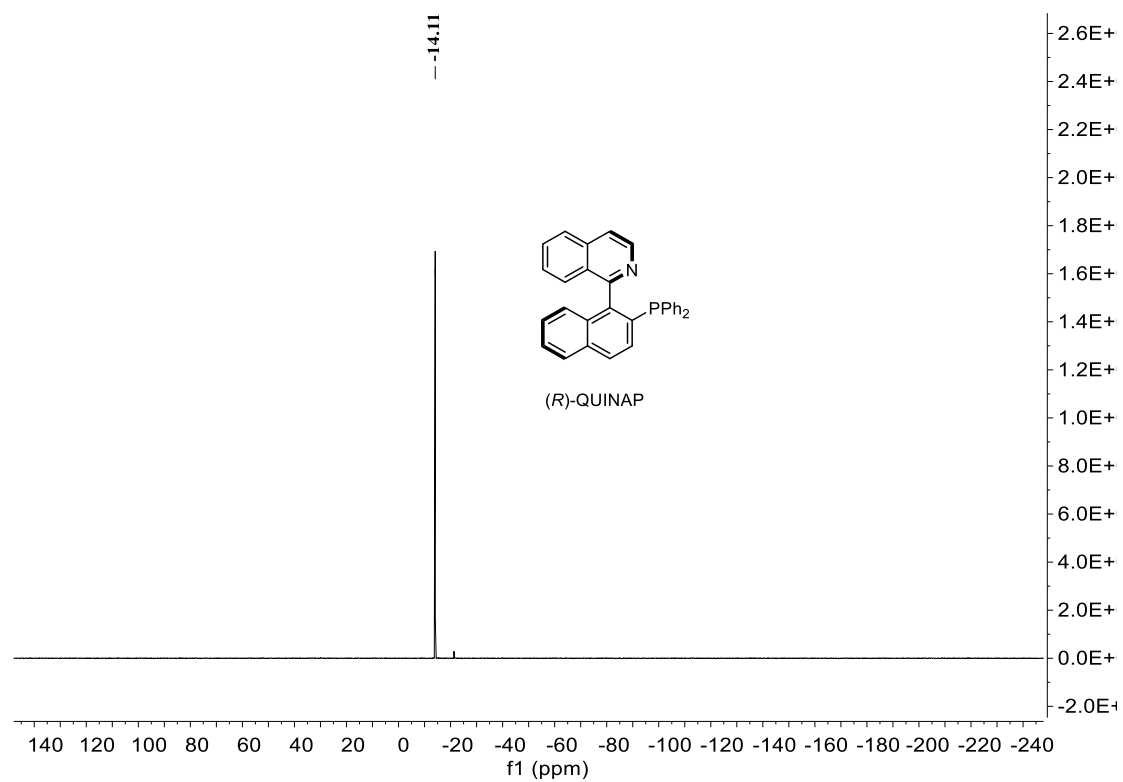

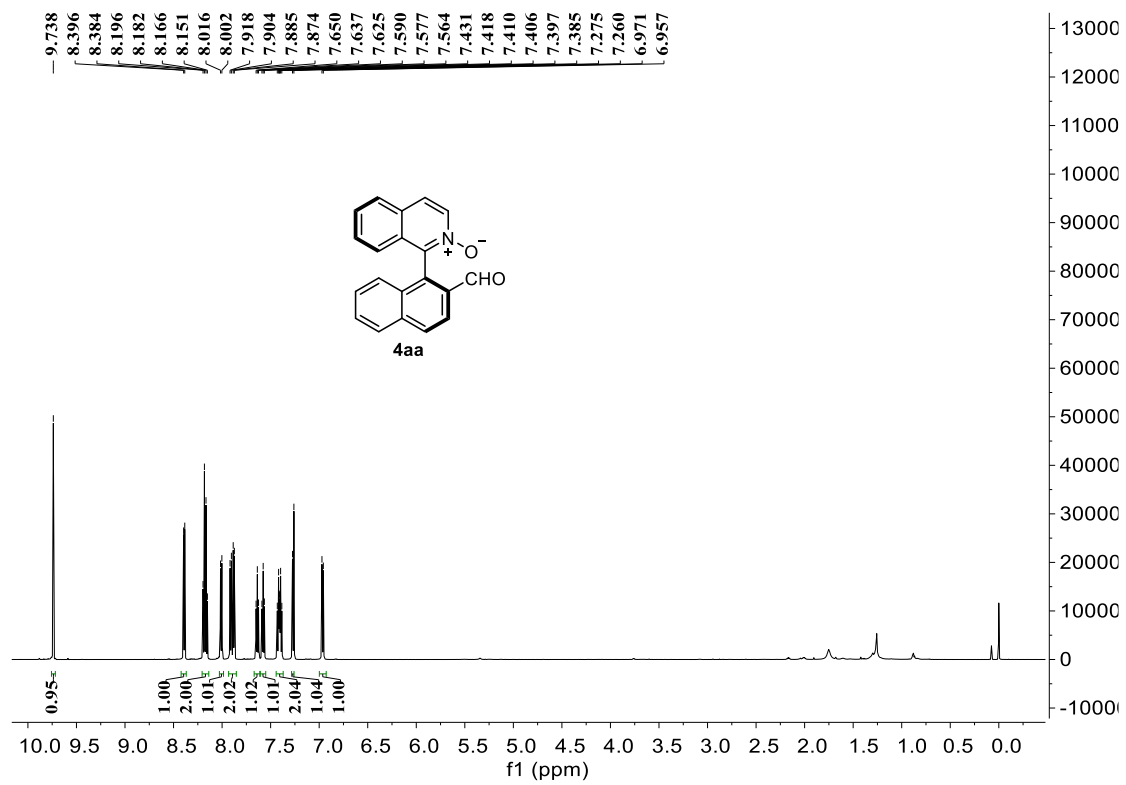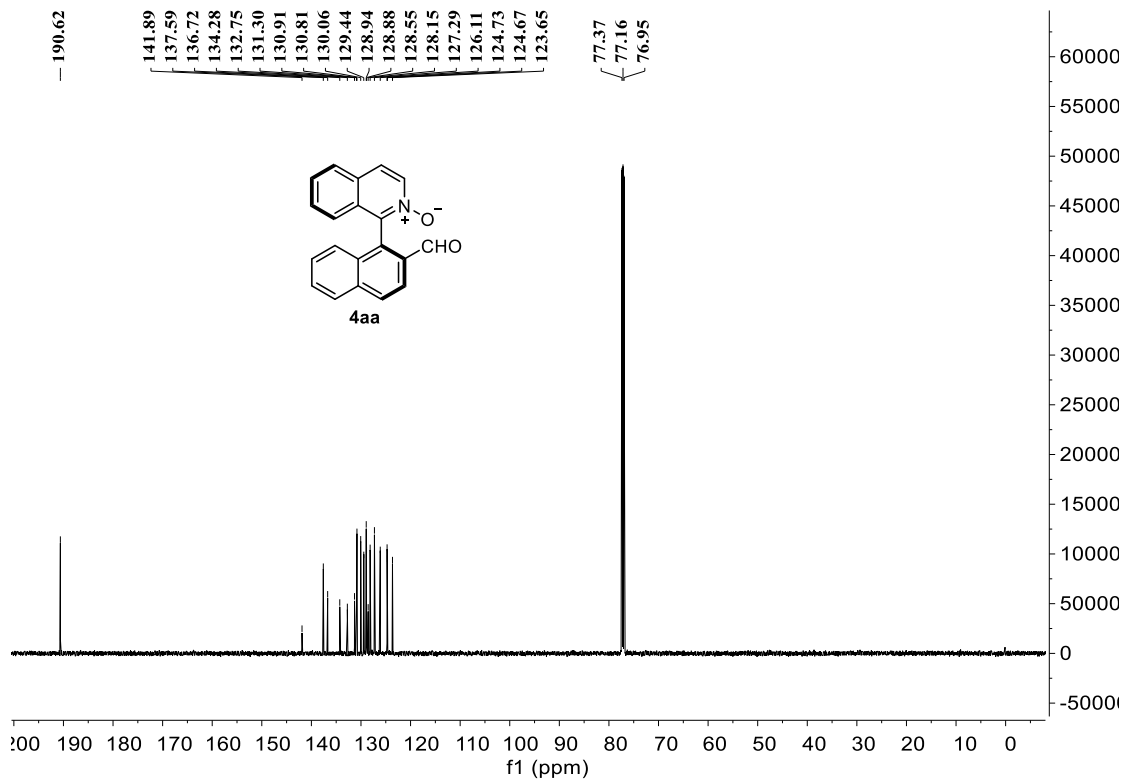

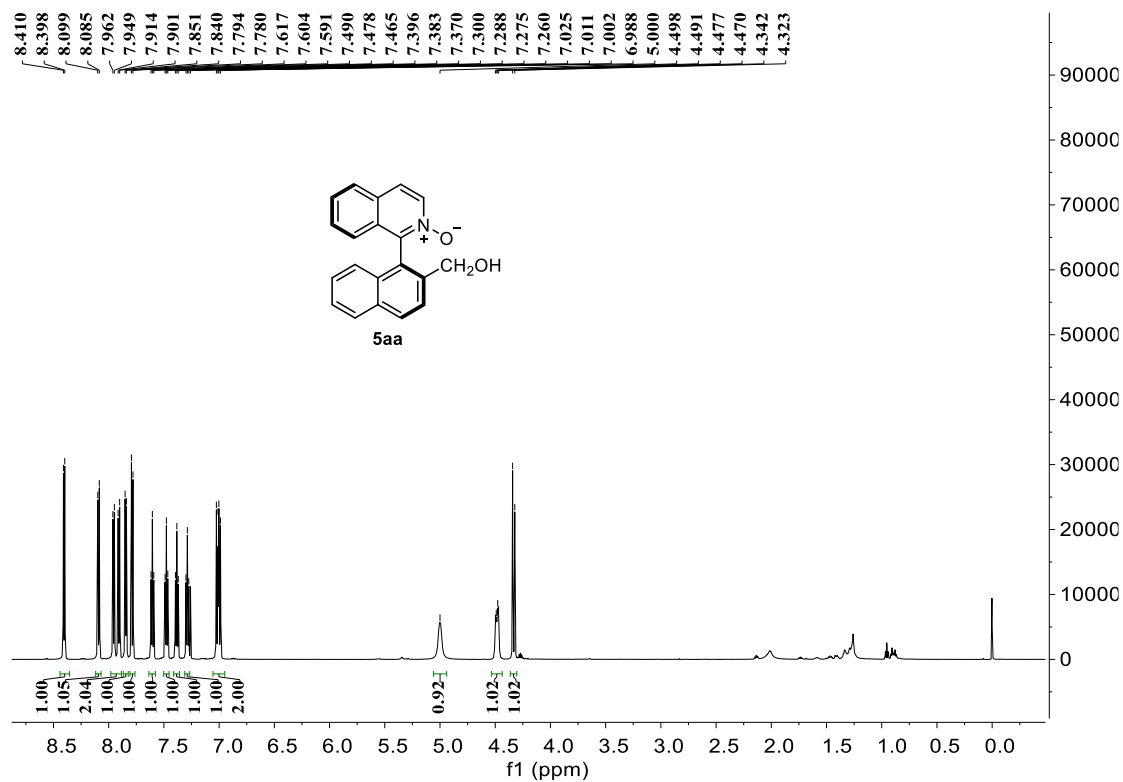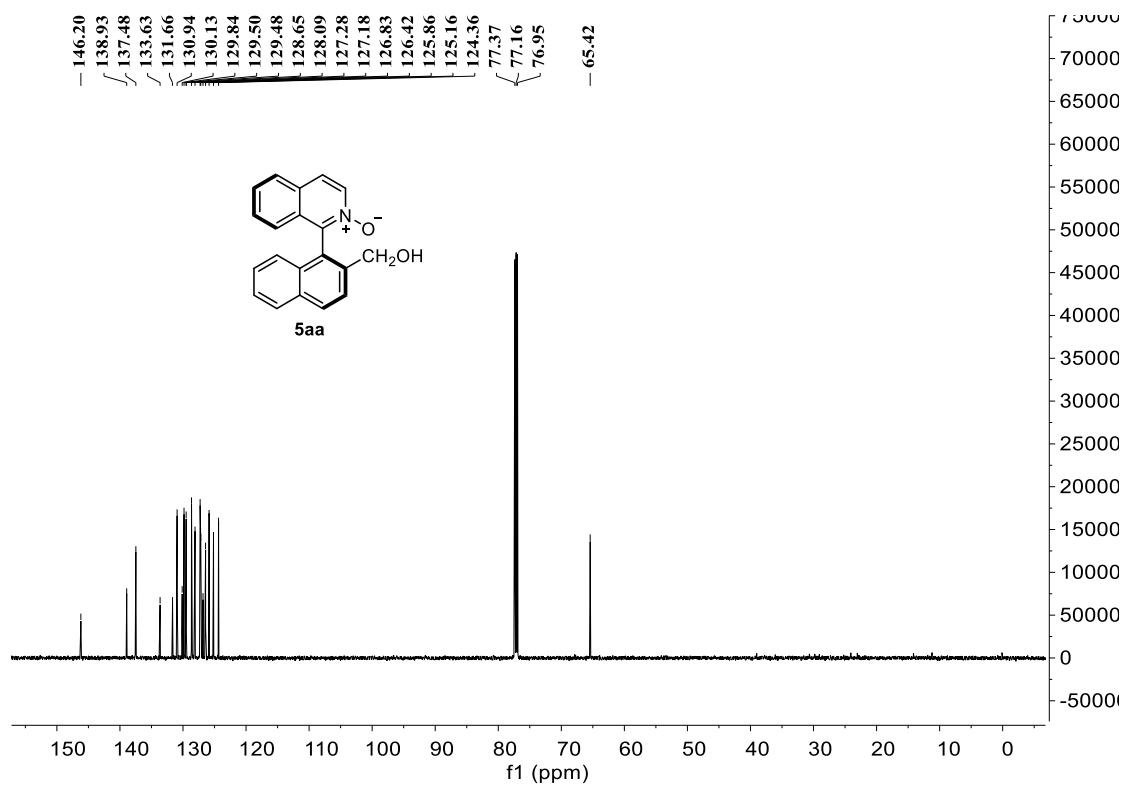

## 5. Copies of HPLC spectra for racemic and chiral products

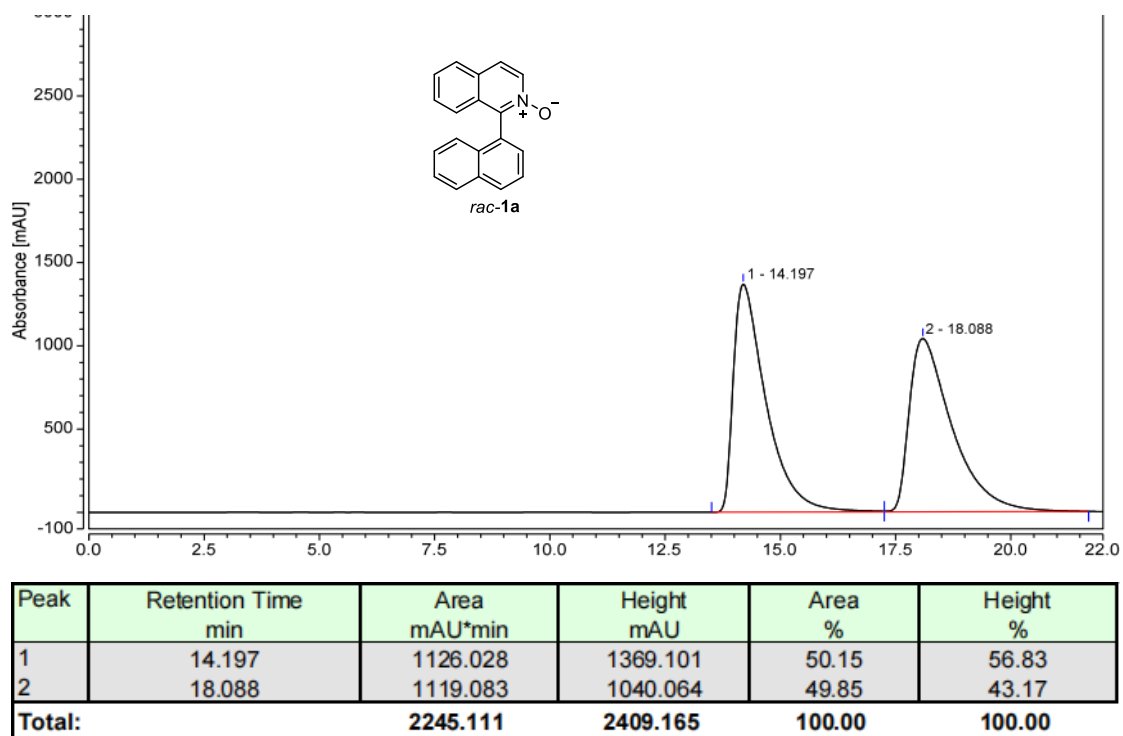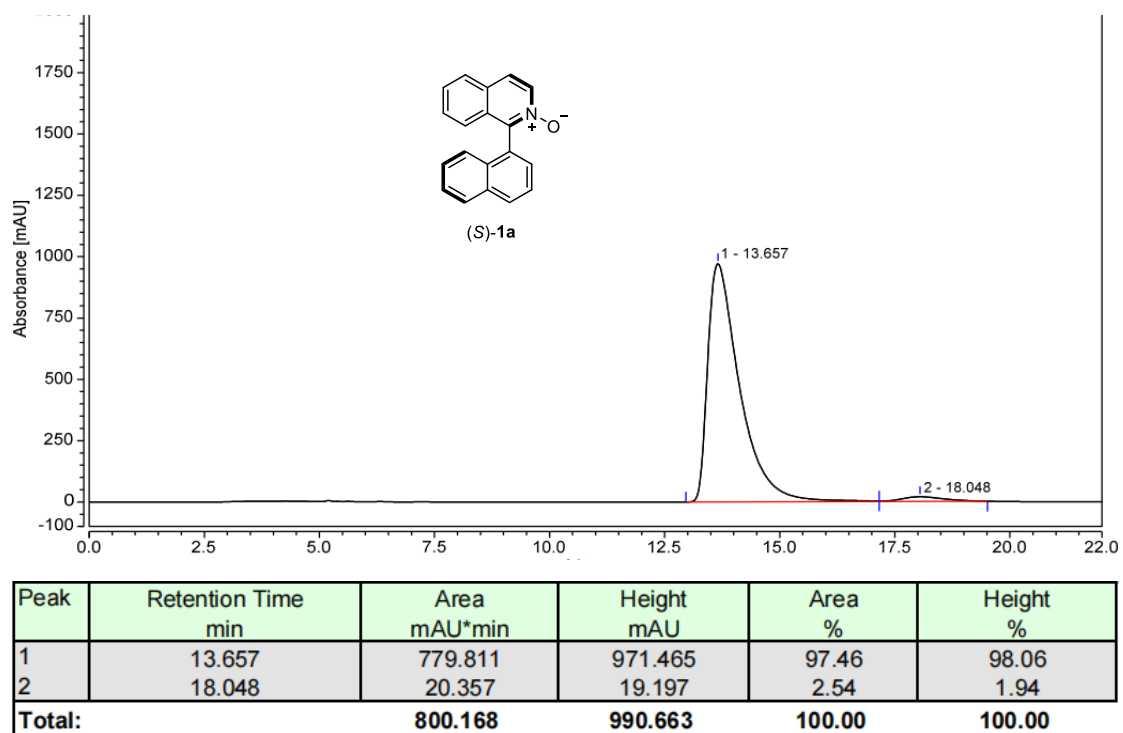

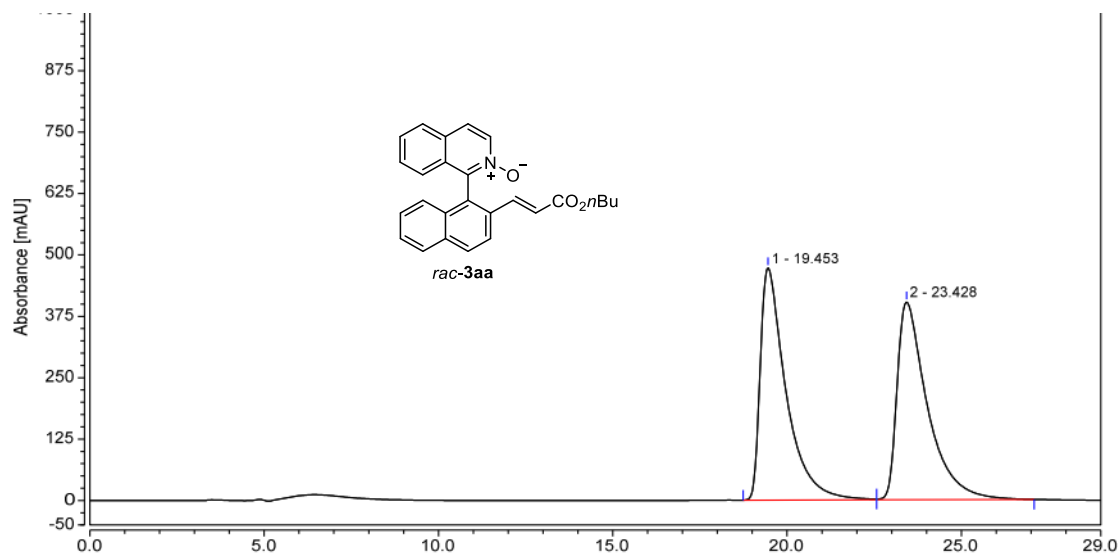

| Peak          | Retention Time min | Area mAU*min   | Height mAU     | Area %        | Height %      |
|---------------|--------------------|----------------|----------------|---------------|---------------|
| 1             | 19.453             | 405.598        | 473.162        | 49.96         | 54.01         |
| 2             | 23.428             | 406.249        | 402.914        | 50.04         | 45.99         |
| <b>Total:</b> |                    | <b>811.847</b> | <b>876.076</b> | <b>100.00</b> | <b>100.00</b> |

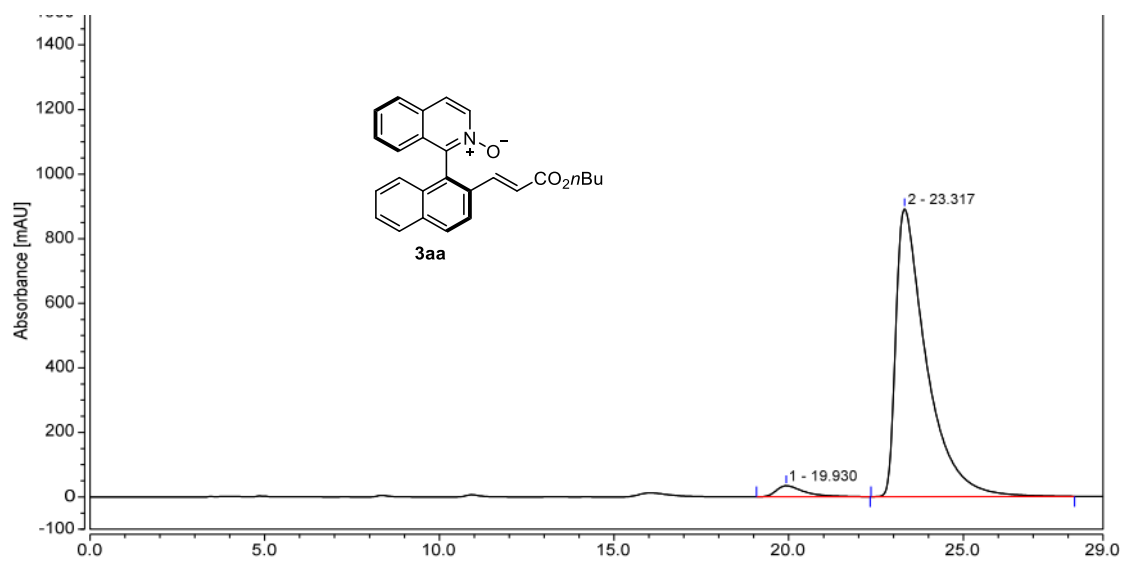

| Peak          | Retention Time min | Area mAU*min   | Height mAU     | Area %        | Height %      |
|---------------|--------------------|----------------|----------------|---------------|---------------|
| 1             | 19.930             | 31.658         | 34.043         | 3.38          | 3.68          |
| 2             | 23.317             | 904.619        | 892.053        | 96.62         | 96.32         |
| <b>Total:</b> |                    | <b>936.277</b> | <b>926.096</b> | <b>100.00</b> | <b>100.00</b> |

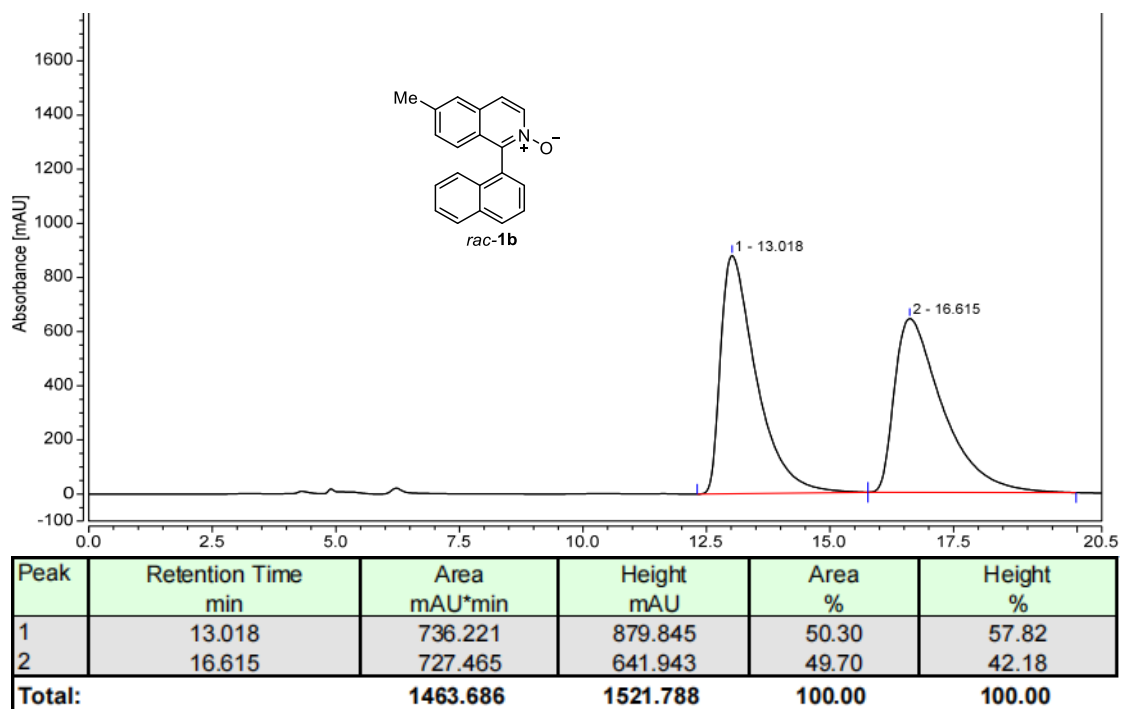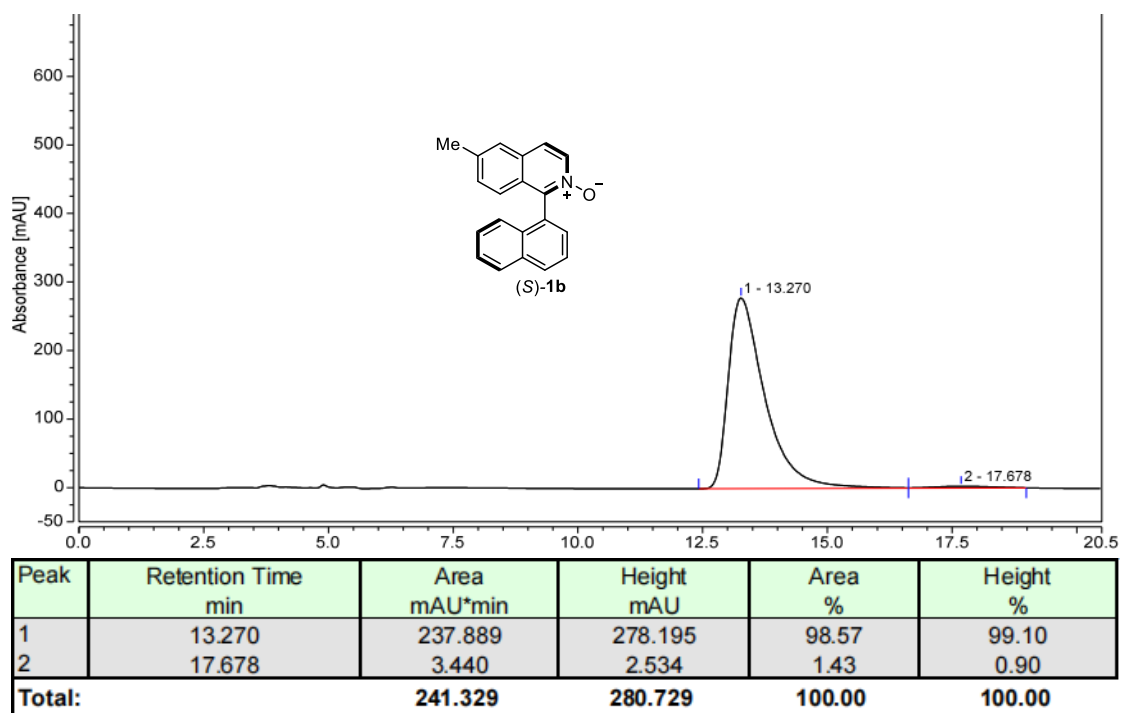

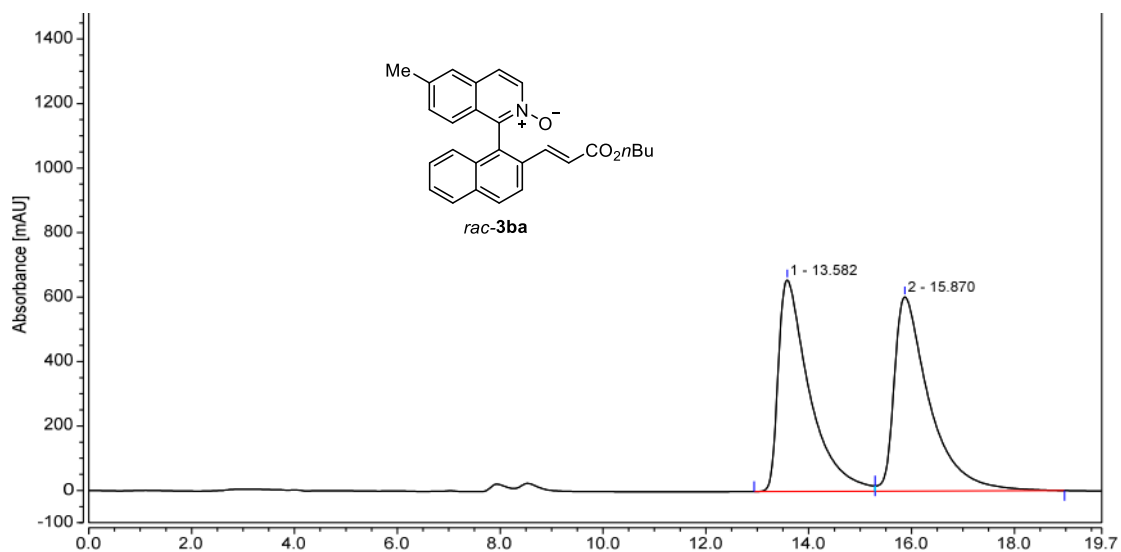

| Peak          | Retention Time<br>min | Area<br>mAU*min | Height<br>mAU   | Area<br>%     | Height<br>%   |
|---------------|-----------------------|-----------------|-----------------|---------------|---------------|
| 1             | 13.582                | 461.920         | 656.082         | 49.21         | 52.13         |
| 2             | 15.870                | 476.698         | 602.588         | 50.79         | 47.87         |
| <b>Total:</b> |                       | <b>938.619</b>  | <b>1258.670</b> | <b>100.00</b> | <b>100.00</b> |

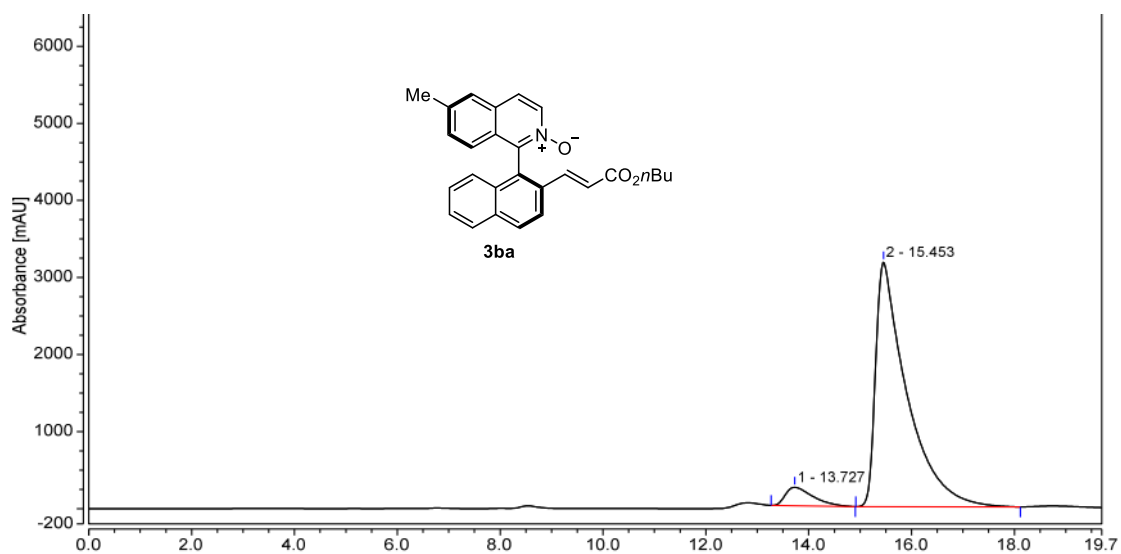

| Peak          | Retention Time<br>min | Area<br>mAU*min | Height<br>mAU   | Area<br>%     | Height<br>%   |
|---------------|-----------------------|-----------------|-----------------|---------------|---------------|
| 1             | 13.727                | 150.261         | 240.815         | 6.31          | 7.04          |
| 2             | 15.453                | 2231.265        | 3179.616        | 93.69         | 92.96         |
| <b>Total:</b> |                       | <b>2381.526</b> | <b>3420.431</b> | <b>100.00</b> | <b>100.00</b> |

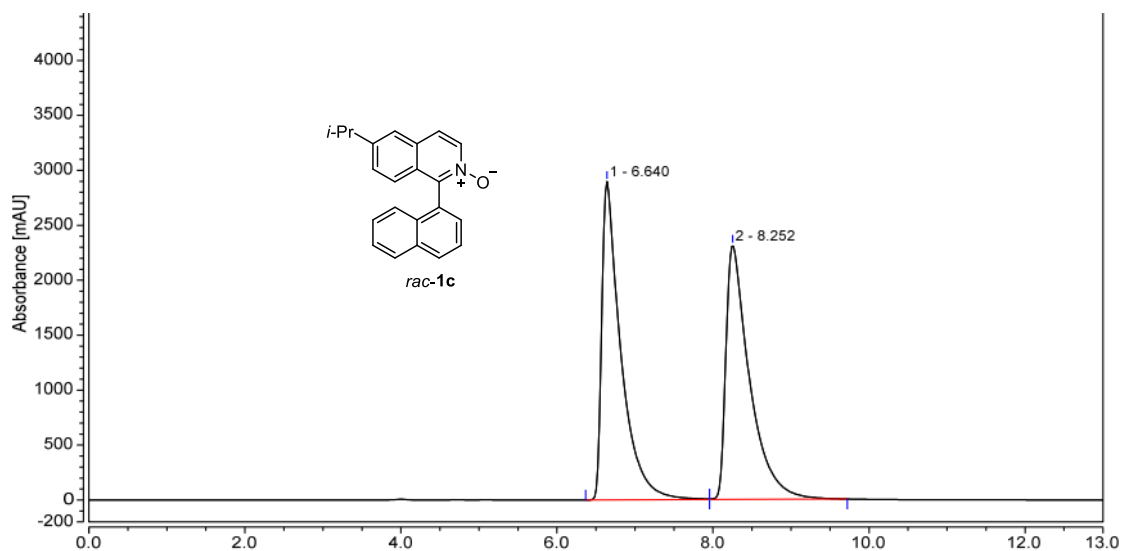

| Peak          | Retention Time min | Area mAU*min    | Height mAU      | Area %        | Height %      |
|---------------|--------------------|-----------------|-----------------|---------------|---------------|
| 1             | 6.640              | 823.599         | 2898.515        | 50.34         | 55.61         |
| 2             | 8.252              | 812.409         | 2314.057        | 49.66         | 44.39         |
| <b>Total:</b> |                    | <b>1636.008</b> | <b>5212.573</b> | <b>100.00</b> | <b>100.00</b> |

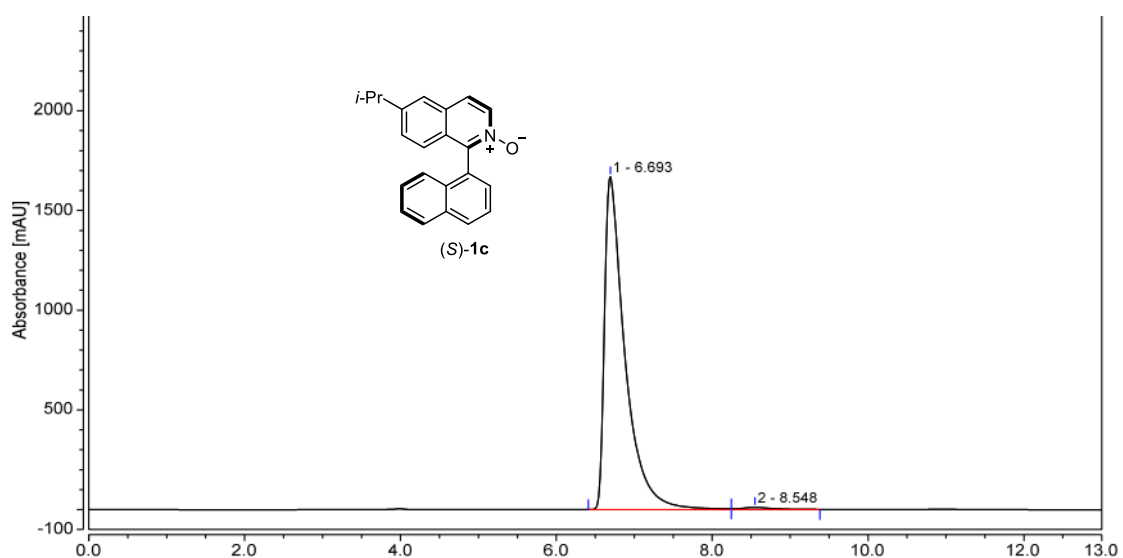

| Peak          | Retention Time min | Area mAU*min   | Height mAU      | Area %        | Height %      |
|---------------|--------------------|----------------|-----------------|---------------|---------------|
| 1             | 6.693              | 507.519        | 1669.123        | 99.07         | 99.38         |
| 2             | 8.548              | 4.740          | 10.473          | 0.93          | 0.62          |
| <b>Total:</b> |                    | <b>512.259</b> | <b>1679.596</b> | <b>100.00</b> | <b>100.00</b> |



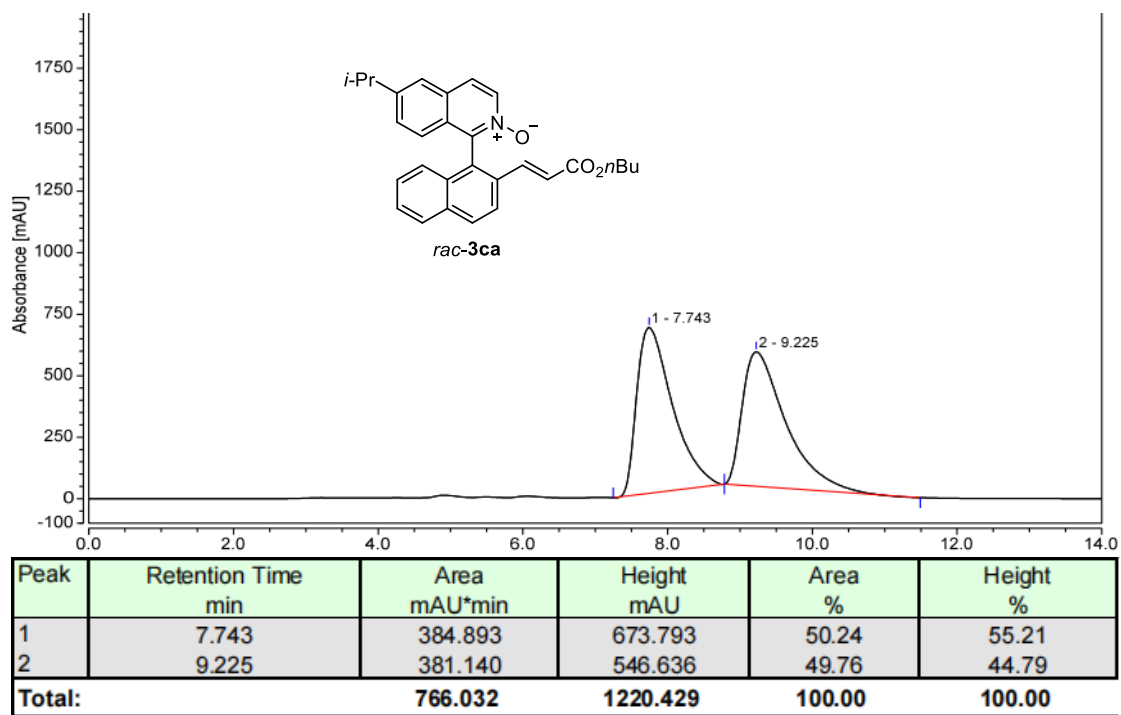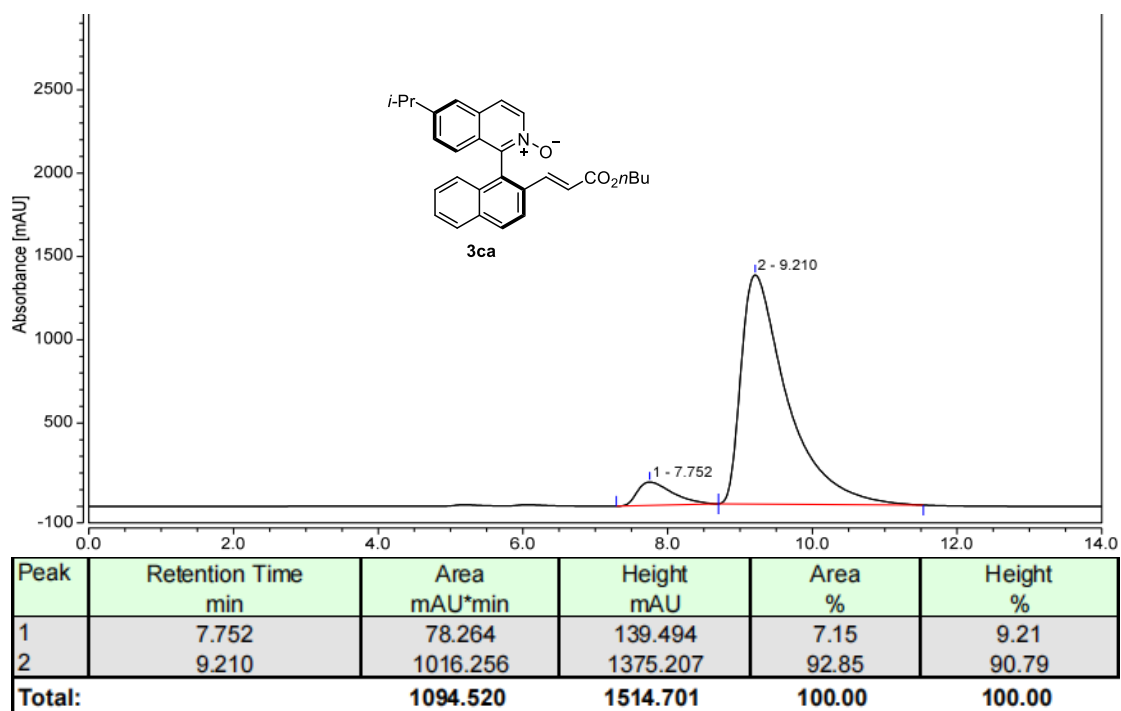

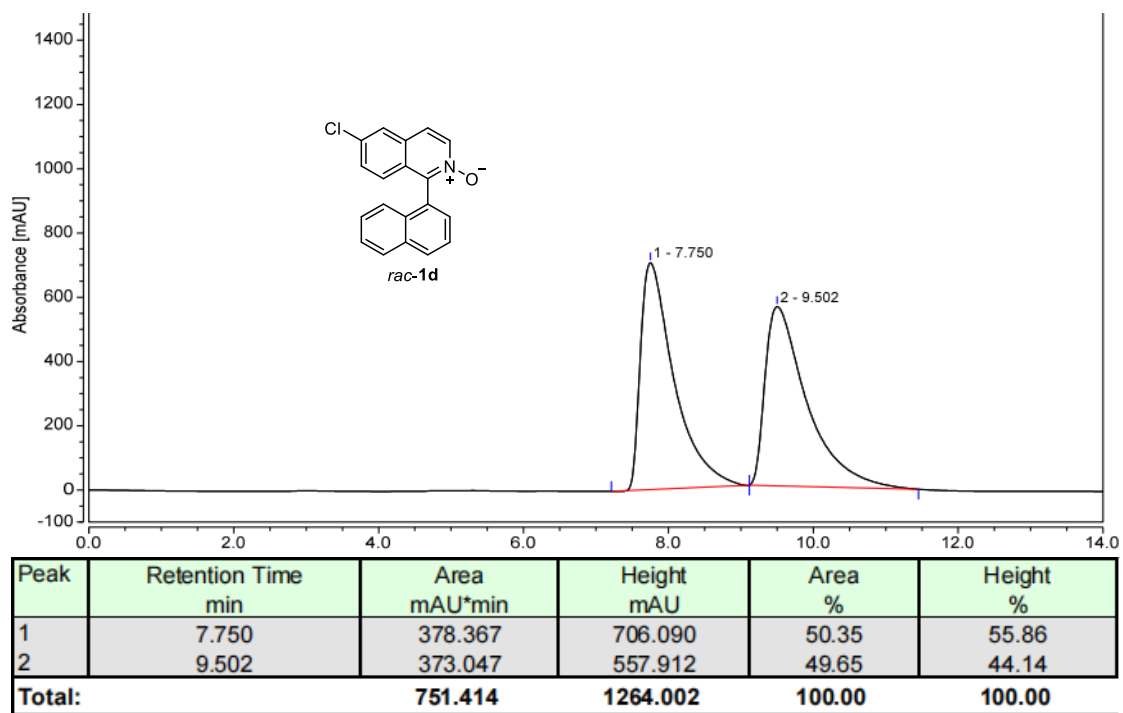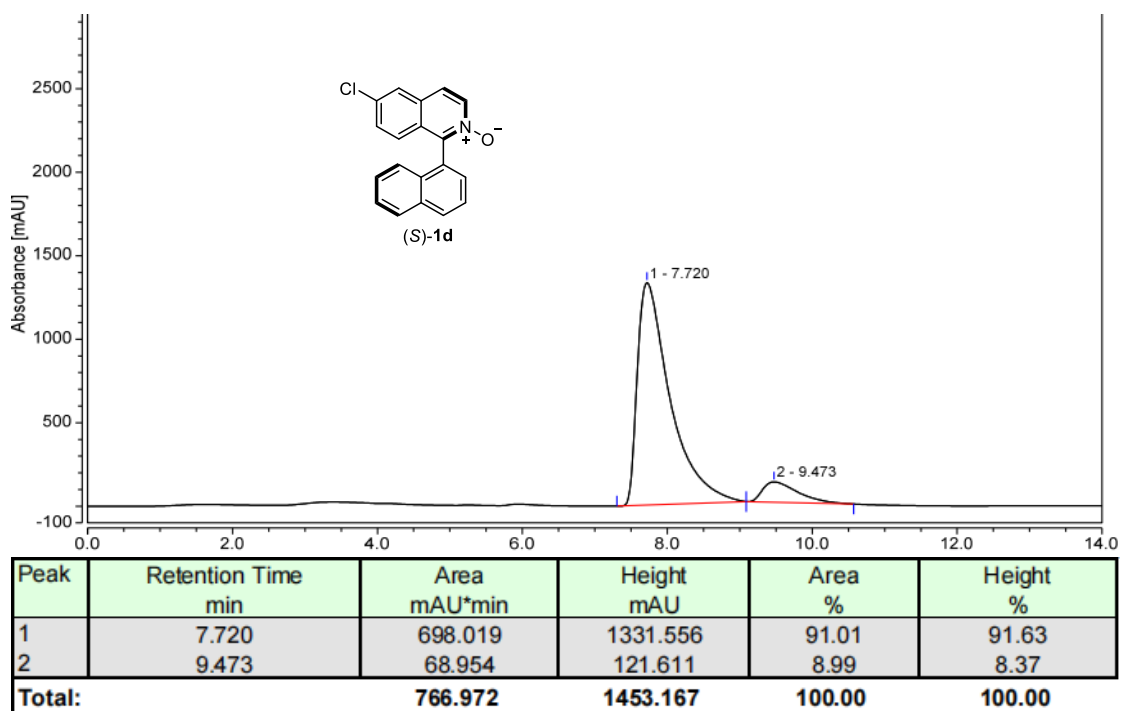

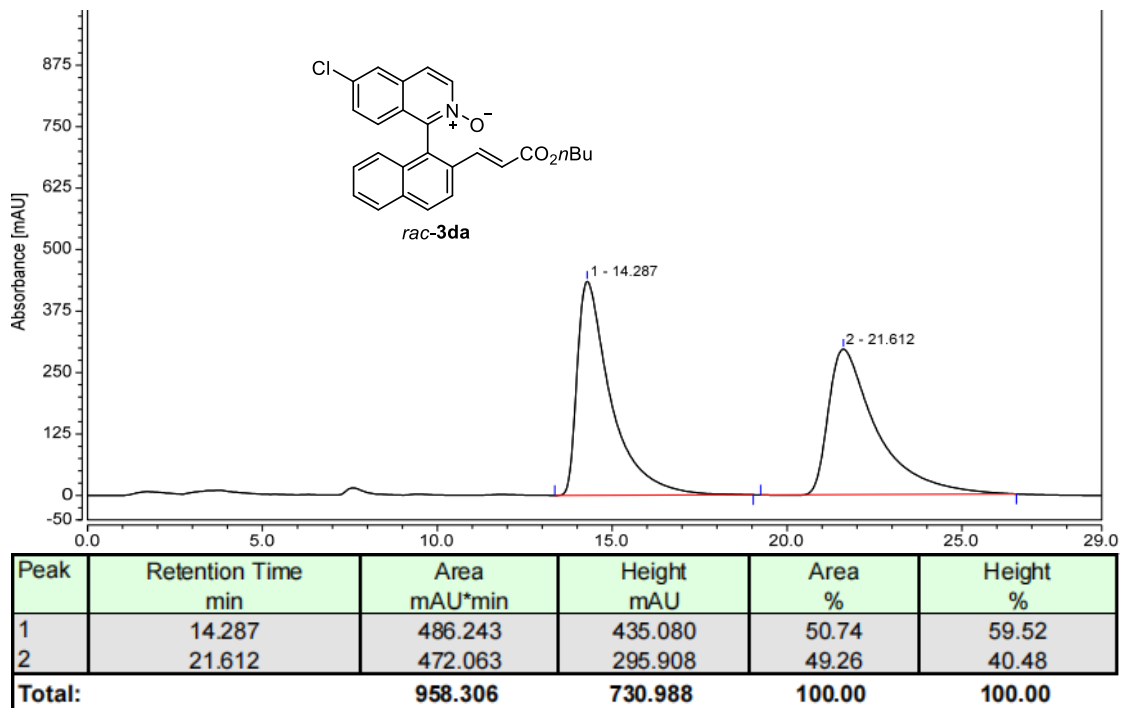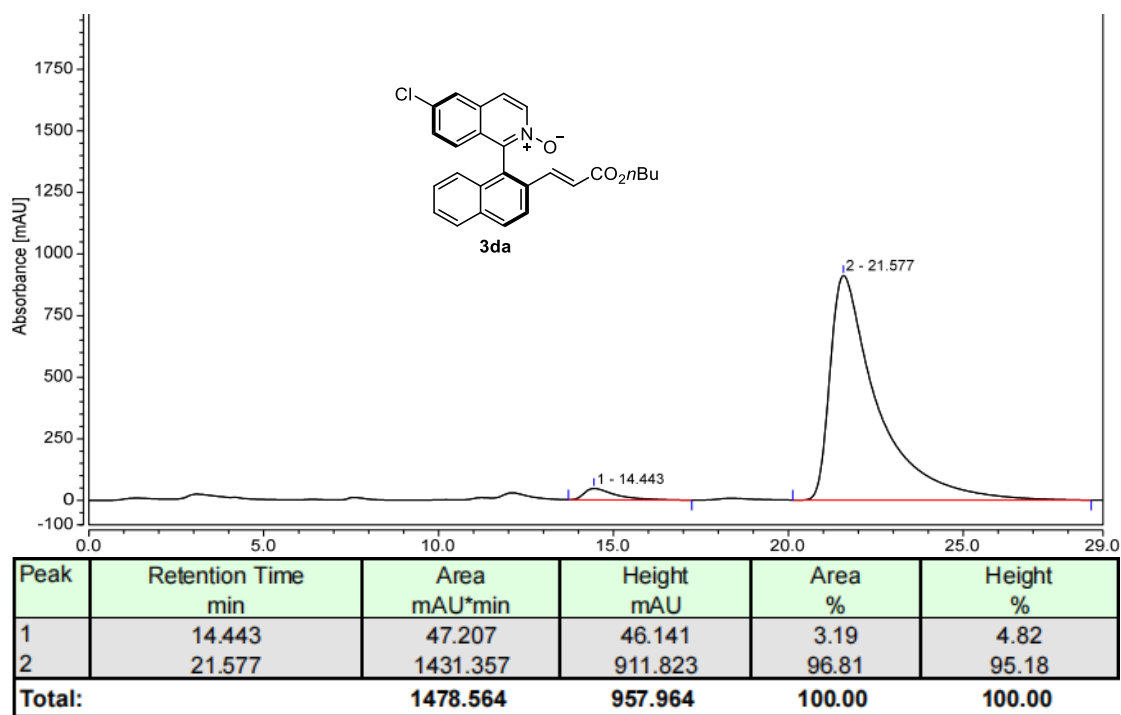

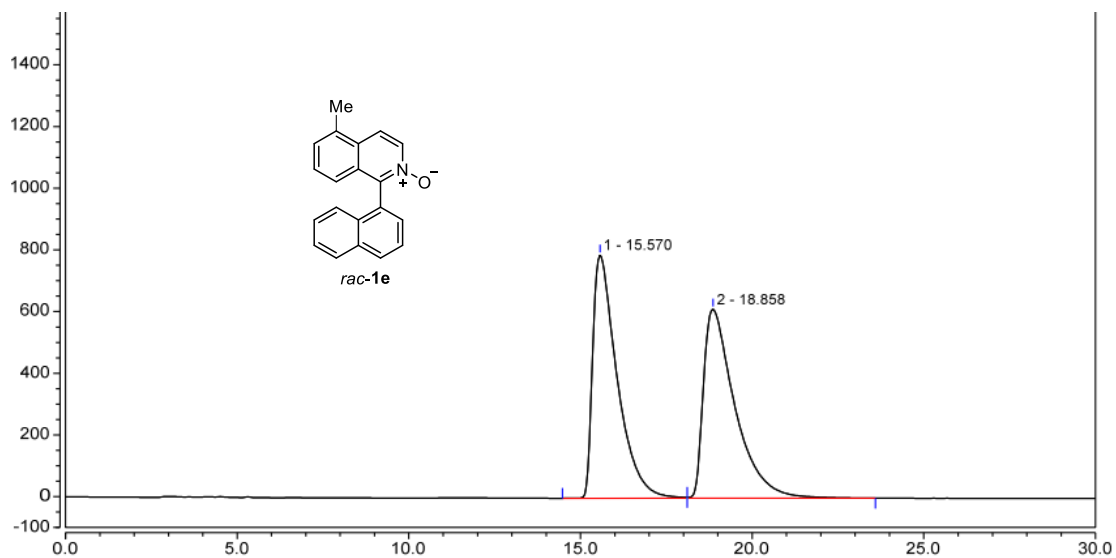

| Peak          | Retention Time min | Area mAU*min    | Height mAU      | Area %        | Height %      |
|---------------|--------------------|-----------------|-----------------|---------------|---------------|
| 1             | 15.570             | 650.705         | 788.504         | 49.93         | 56.25         |
| 2             | 18.858             | 652.429         | 613.279         | 50.07         | 43.75         |
| <b>Total:</b> |                    | <b>1303.134</b> | <b>1401.783</b> | <b>100.00</b> | <b>100.00</b> |

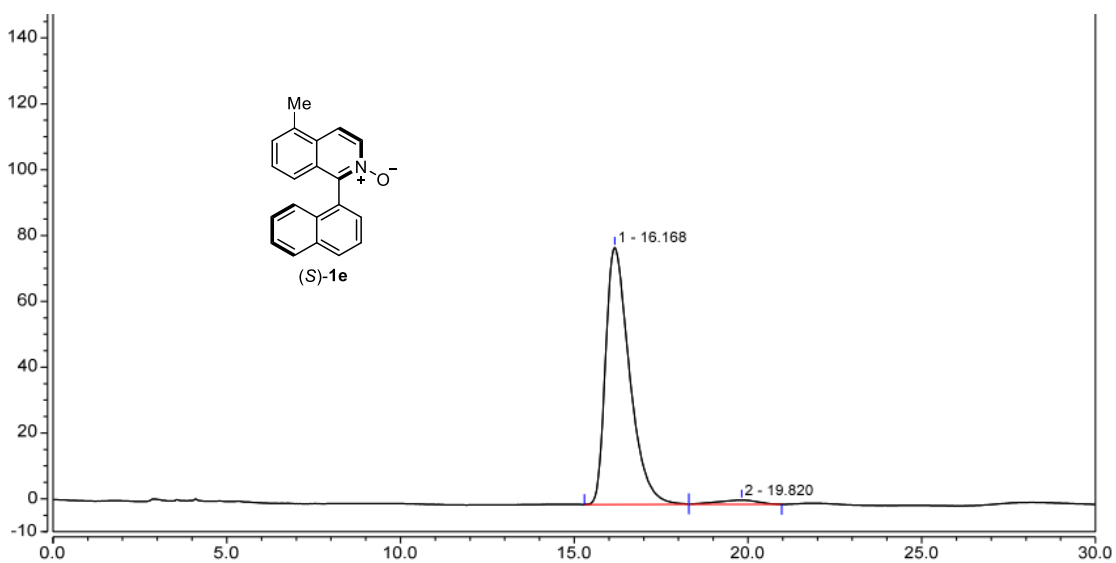

| Peak          | Retention Time min | Area mAU*min  | Height mAU    | Area %        | Height %      |
|---------------|--------------------|---------------|---------------|---------------|---------------|
| 1             | 16.168             | 62.414        | 78.088        | 97.25         | 98.36         |
| 2             | 19.820             | 1.763         | 1.301         | 2.75          | 1.64          |
| <b>Total:</b> |                    | <b>64.177</b> | <b>79.389</b> | <b>100.00</b> | <b>100.00</b> |

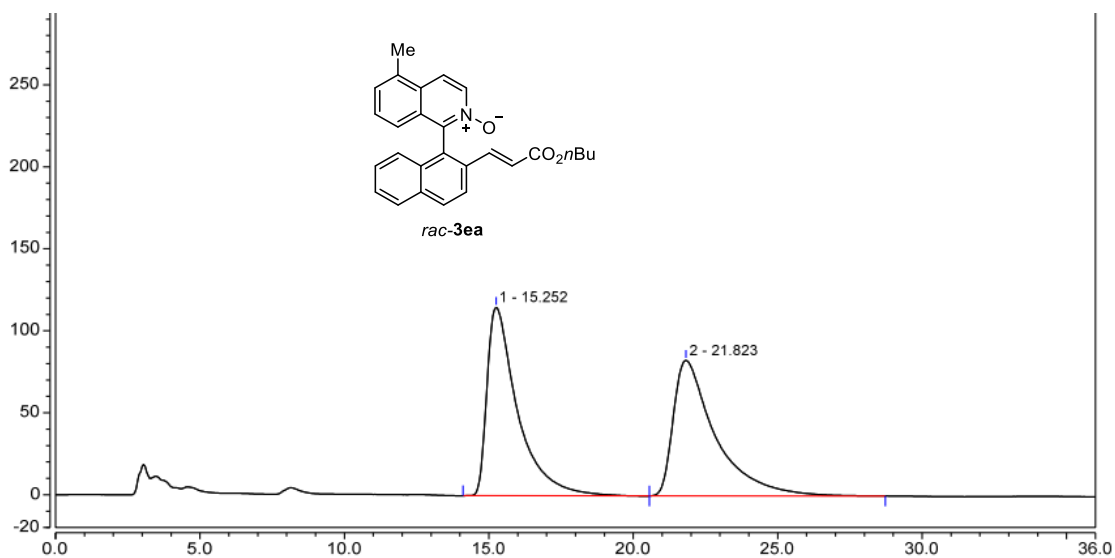

| Peak          | Retention Time<br>min | Area<br>mAU*min | Height<br>mAU  | Area<br>%     | Height<br>%   |
|---------------|-----------------------|-----------------|----------------|---------------|---------------|
| 1             | 15.252                | 140.782         | 114.892        | 50.17         | 58.15         |
| 2             | 21.823                | 139.807         | 82.687         | 49.83         | 41.85         |
| <b>Total:</b> |                       | <b>280.589</b>  | <b>197.578</b> | <b>100.00</b> | <b>100.00</b> |

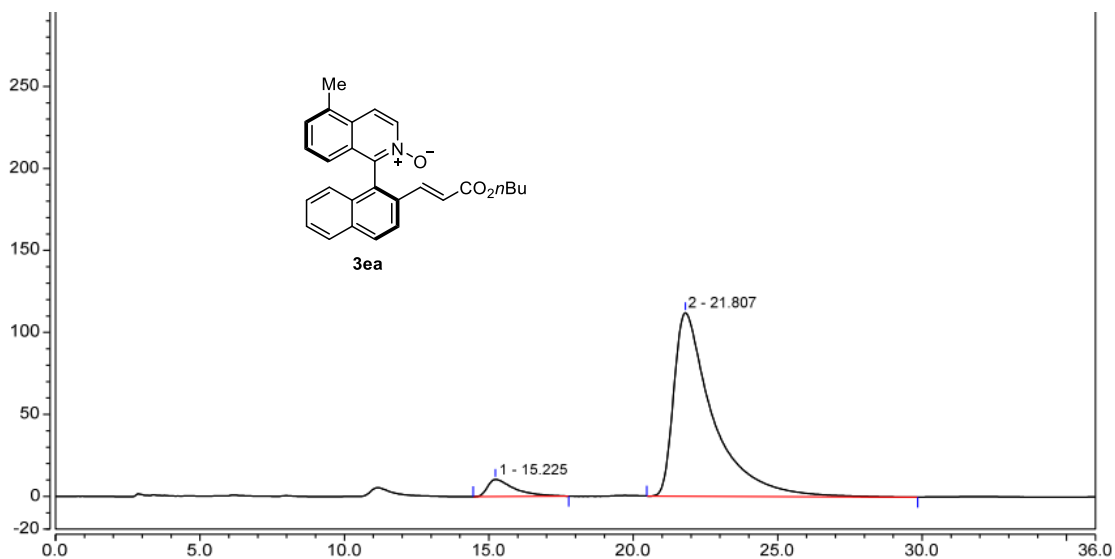

| Peak          | Retention Time<br>min | Area<br>mAU*min | Height<br>mAU  | Area<br>%     | Height<br>%   |
|---------------|-----------------------|-----------------|----------------|---------------|---------------|
| 1             | 15.225                | 11.297          | 10.485         | 6.04          | 8.57          |
| 2             | 21.807                | 175.634         | 111.846        | 93.96         | 91.43         |
| <b>Total:</b> |                       | <b>186.932</b>  | <b>122.331</b> | <b>100.00</b> | <b>100.00</b> |

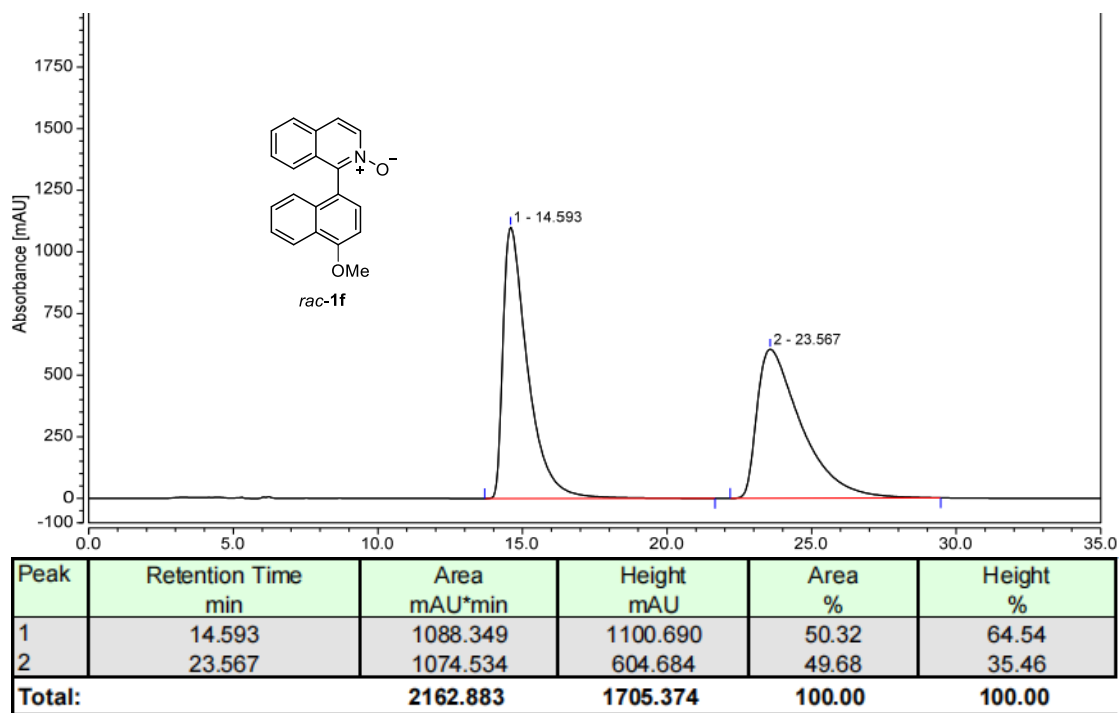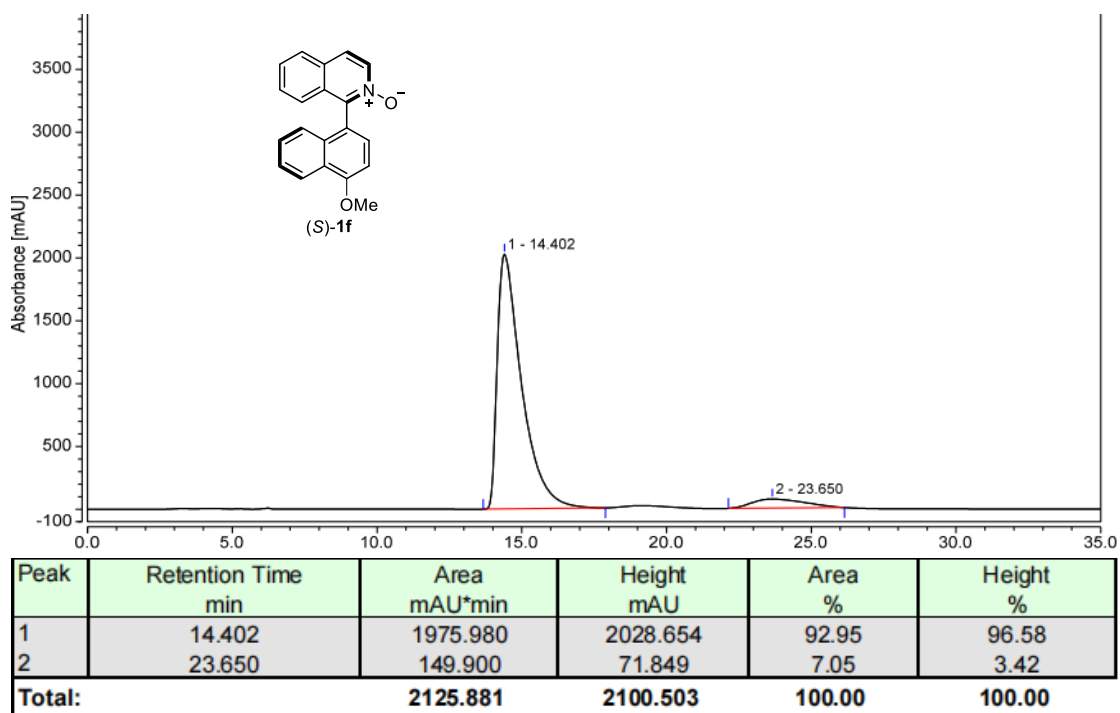

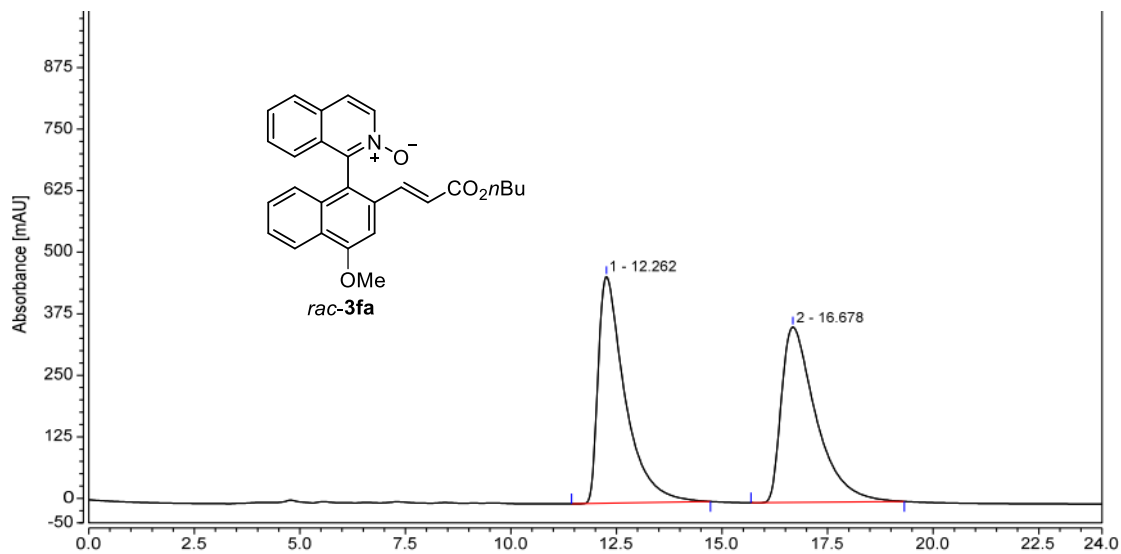

| Peak          | Retention Time min | Area mAU*min   | Height mAU     | Area %        | Height %      |
|---------------|--------------------|----------------|----------------|---------------|---------------|
| 1             | 12.262             | 339.644        | 460.577        | 50.09         | 56.35         |
| 2             | 16.678             | 338.440        | 356.723        | 49.91         | 43.65         |
| <b>Total:</b> |                    | <b>678.084</b> | <b>817.299</b> | <b>100.00</b> | <b>100.00</b> |

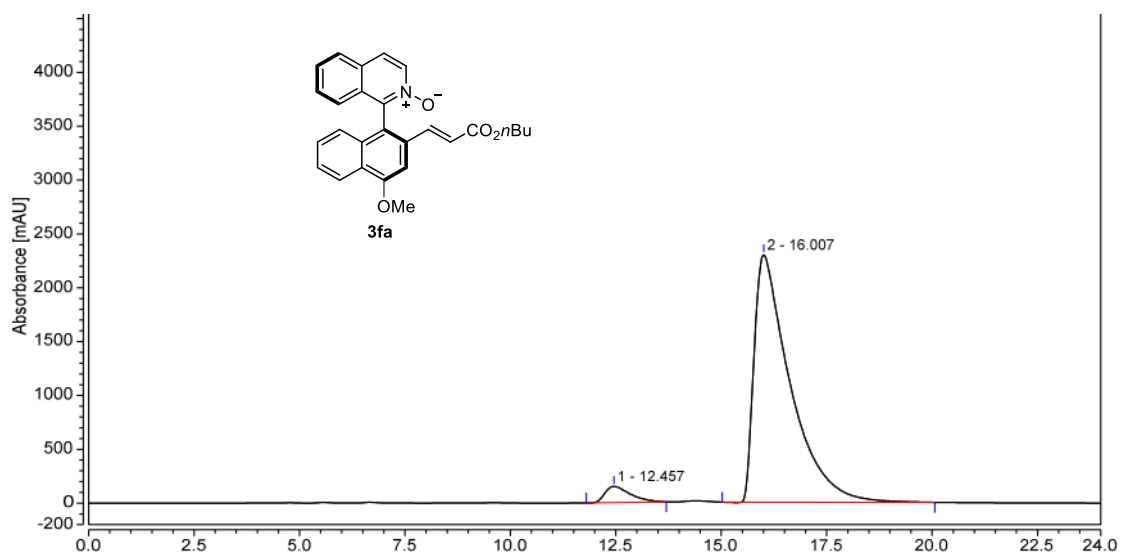

| Peak          | Retention Time min | Area mAU*min    | Height mAU      | Area %        | Height %      |
|---------------|--------------------|-----------------|-----------------|---------------|---------------|
| 1             | 12.457             | 105.416         | 150.447         | 4.43          | 6.14          |
| 2             | 16.007             | 2272.511        | 2298.769        | 95.57         | 93.86         |
| <b>Total:</b> |                    | <b>2377.927</b> | <b>2449.216</b> | <b>100.00</b> | <b>100.00</b> |

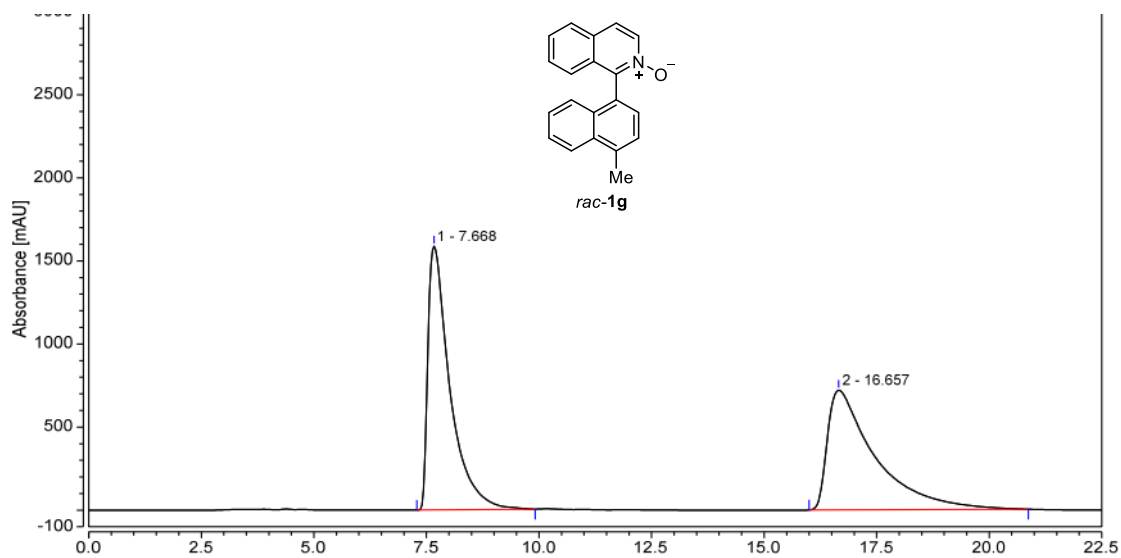

| Peak          | Retention Time<br>min | Area<br>mAU*min | Height<br>mAU   | Area<br>%     | Height<br>%   |
|---------------|-----------------------|-----------------|-----------------|---------------|---------------|
| 1             | 7.668                 | 899.817         | 1587.972        | 50.49         | 68.78         |
| 2             | 16.657                | 882.451         | 720.847         | 49.51         | 31.22         |
| <b>Total:</b> |                       | <b>1782.269</b> | <b>2308.819</b> | <b>100.00</b> | <b>100.00</b> |

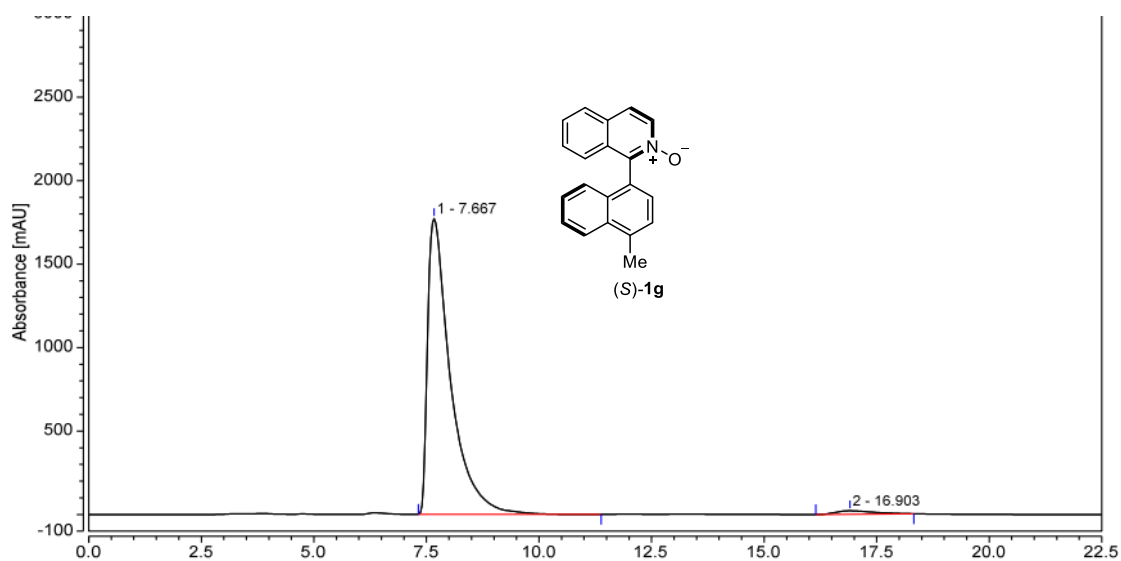

| Peak          | Retention Time<br>min | Area<br>mAU*min | Height<br>mAU   | Area<br>%     | Height<br>%   |
|---------------|-----------------------|-----------------|-----------------|---------------|---------------|
| 1             | 7.667                 | 1045.206        | 1771.075        | 98.16         | 98.87         |
| 2             | 16.903                | 19.613          | 20.300          | 1.84          | 1.13          |
| <b>Total:</b> |                       | <b>1064.819</b> | <b>1791.375</b> | <b>100.00</b> | <b>100.00</b> |



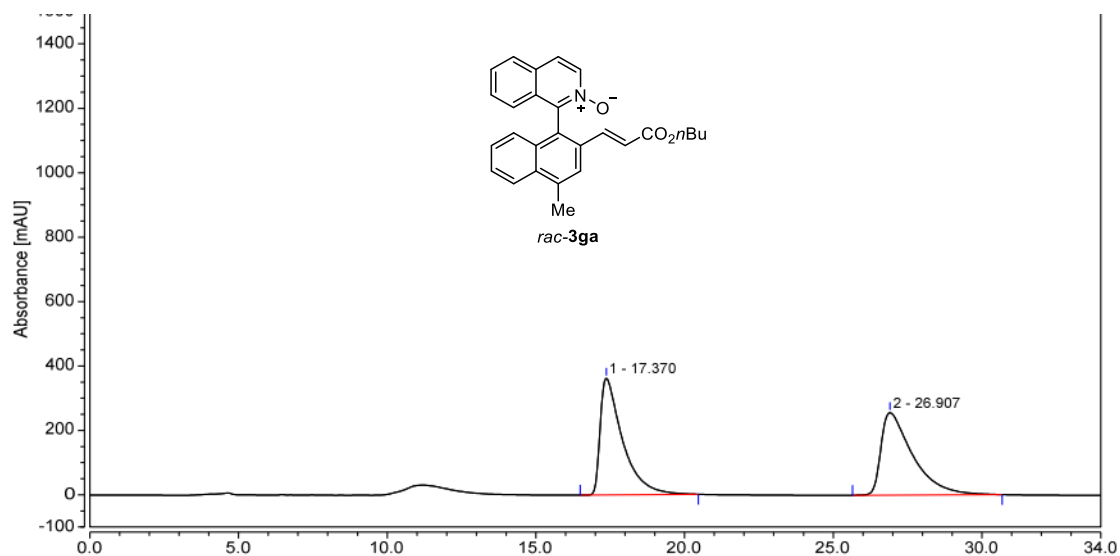

| Peak          | Retention Time min | Area mAU*min   | Height mAU     | Area %        | Height %      |
|---------------|--------------------|----------------|----------------|---------------|---------------|
| 1             | 17.370             | 316.176        | 362.652        | 49.98         | 58.60         |
| 2             | 26.907             | 316.431        | 256.194        | 50.02         | 41.40         |
| <b>Total:</b> |                    | <b>632.606</b> | <b>618.846</b> | <b>100.00</b> | <b>100.00</b> |

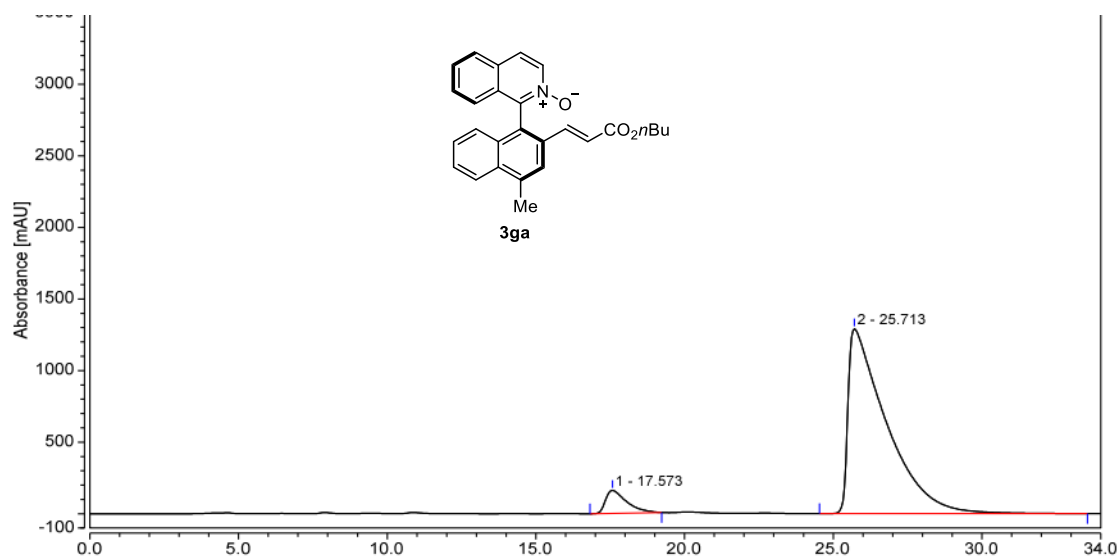

| Peak          | Retention Time min | Area mAU*min    | Height mAU      | Area %        | Height %      |
|---------------|--------------------|-----------------|-----------------|---------------|---------------|
| 1             | 17.573             | 130.764         | 159.503         | 6.34          | 11.00         |
| 2             | 25.713             | 1932.438        | 1290.584        | 93.66         | 89.00         |
| <b>Total:</b> |                    | <b>2063.202</b> | <b>1450.087</b> | <b>100.00</b> | <b>100.00</b> |

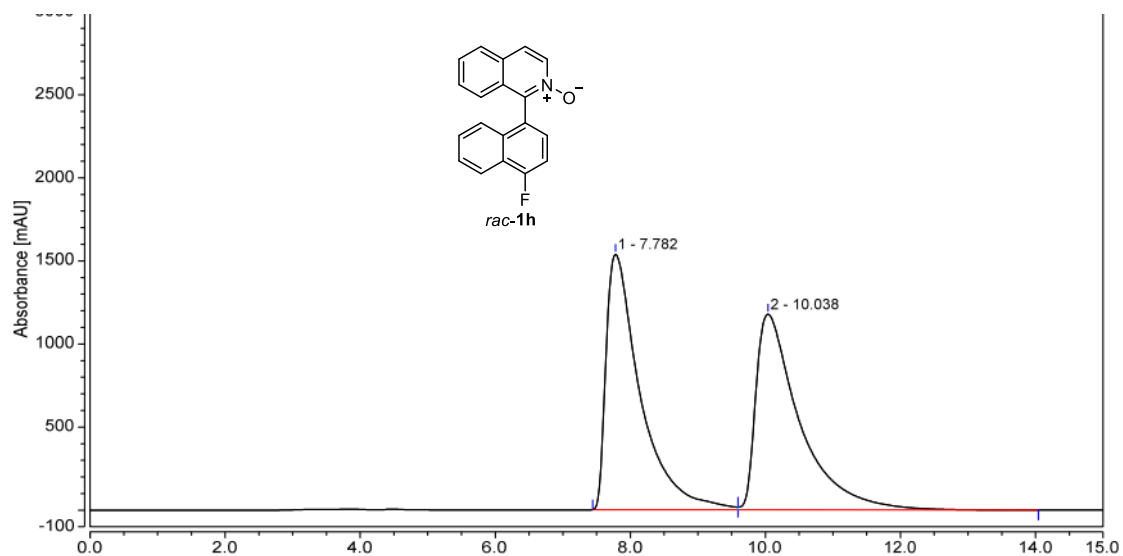

| Peak          | Retention Time min | Area mAU*min    | Height mAU      | Area %        | Height %      |
|---------------|--------------------|-----------------|-----------------|---------------|---------------|
| 1             | 7.782              | 901.361         | 1537.625        | 50.46         | 56.62         |
| 2             | 10.038             | 884.790         | 1178.019        | 49.54         | 43.38         |
| <b>Total:</b> |                    | <b>1786.150</b> | <b>2715.643</b> | <b>100.00</b> | <b>100.00</b> |

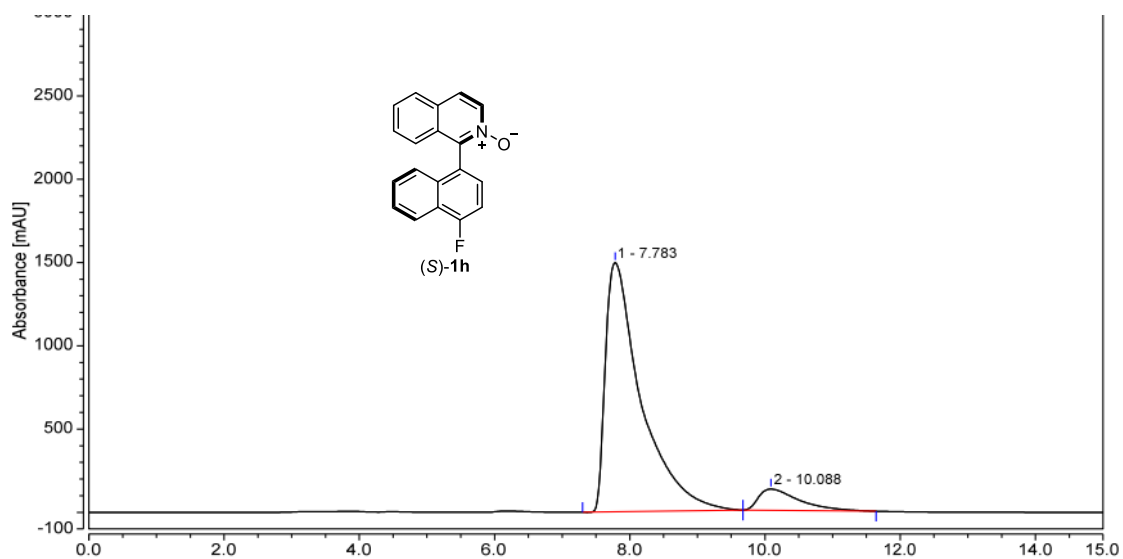

| Peak          | Retention Time min | Area mAU*min    | Height mAU      | Area %        | Height %      |
|---------------|--------------------|-----------------|-----------------|---------------|---------------|
| 1             | 7.783              | 913.693         | 1497.298        | 91.11         | 92.12         |
| 2             | 10.088             | 89.198          | 128.137         | 8.89          | 7.88          |
| <b>Total:</b> |                    | <b>1002.892</b> | <b>1625.435</b> | <b>100.00</b> | <b>100.00</b> |

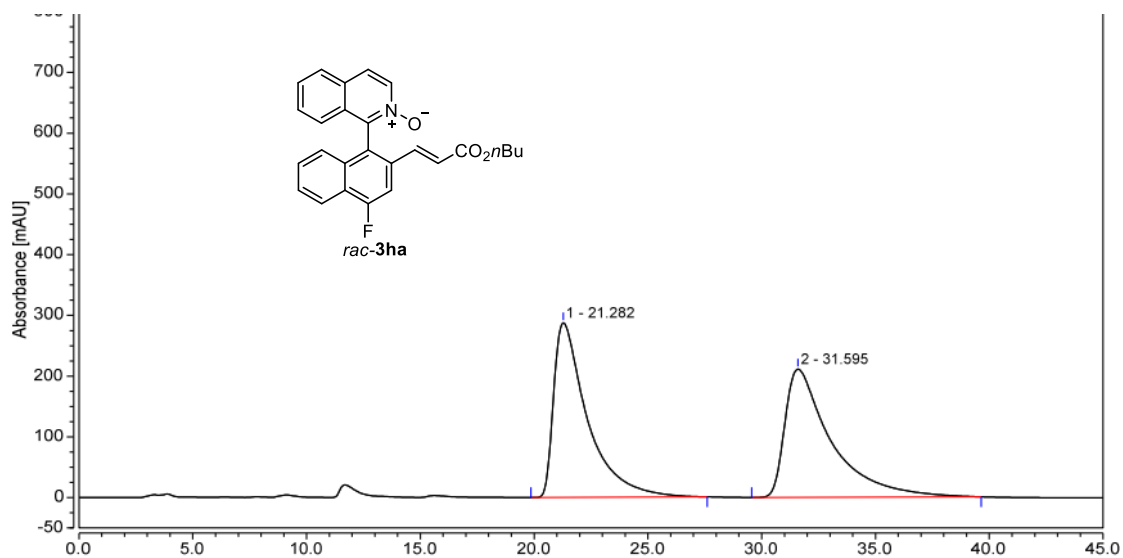

| Peak          | Retention Time min | Area mAU*min   | Height mAU     | Area %        | Height %      |
|---------------|--------------------|----------------|----------------|---------------|---------------|
| 1             | 21.282             | 494.006        | 287.548        | 49.90         | 57.66         |
| 2             | 31.595             | 495.955        | 211.179        | 50.10         | 42.34         |
| <b>Total:</b> |                    | <b>989.960</b> | <b>498.727</b> | <b>100.00</b> | <b>100.00</b> |

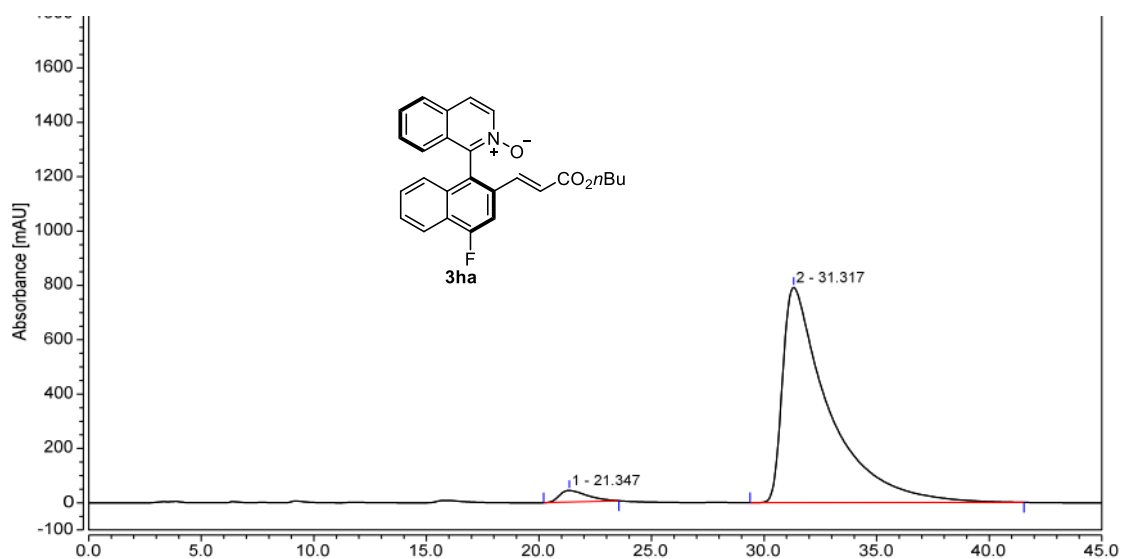

| Peak          | Retention Time min | Area mAU*min    | Height mAU     | Area %        | Height %      |
|---------------|--------------------|-----------------|----------------|---------------|---------------|
| 1             | 21.347             | 61.262          | 42.610         | 3.15          | 5.11          |
| 2             | 31.317             | 1885.876        | 791.565        | 96.85         | 94.89         |
| <b>Total:</b> |                    | <b>1947.138</b> | <b>834.175</b> | <b>100.00</b> | <b>100.00</b> |

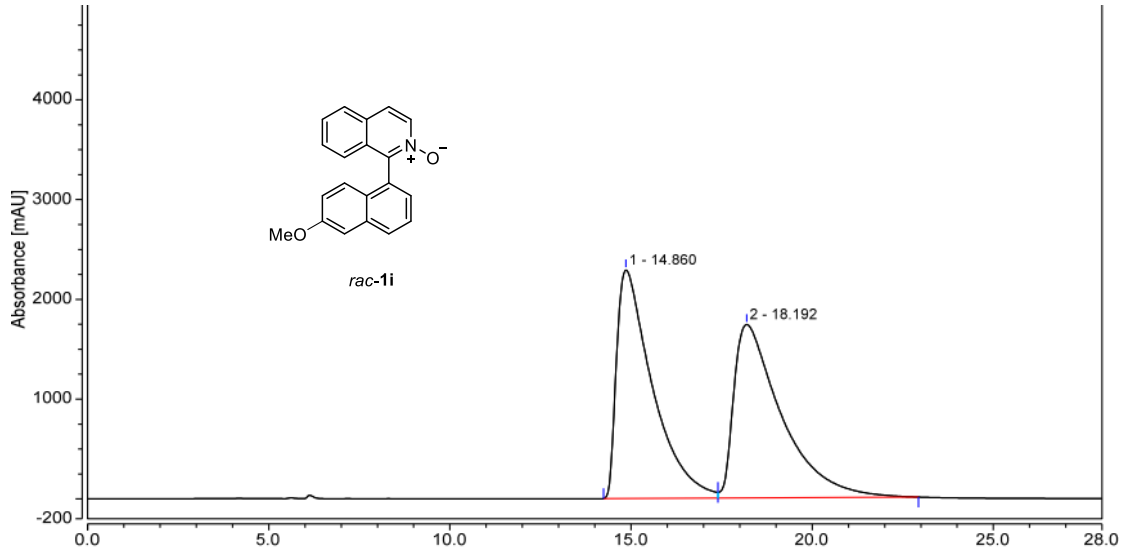

| Peak          | Retention Time min | Area mAU*min    | Height mAU      | Area %        | Height %      |
|---------------|--------------------|-----------------|-----------------|---------------|---------------|
| 1             | 14.860             | 2624.551        | 2292.203        | 49.77         | 56.86         |
| 2             | 18.192             | 2649.225        | 1738.885        | 50.23         | 43.14         |
| <b>Total:</b> |                    | <b>5273.776</b> | <b>4031.088</b> | <b>100.00</b> | <b>100.00</b> |

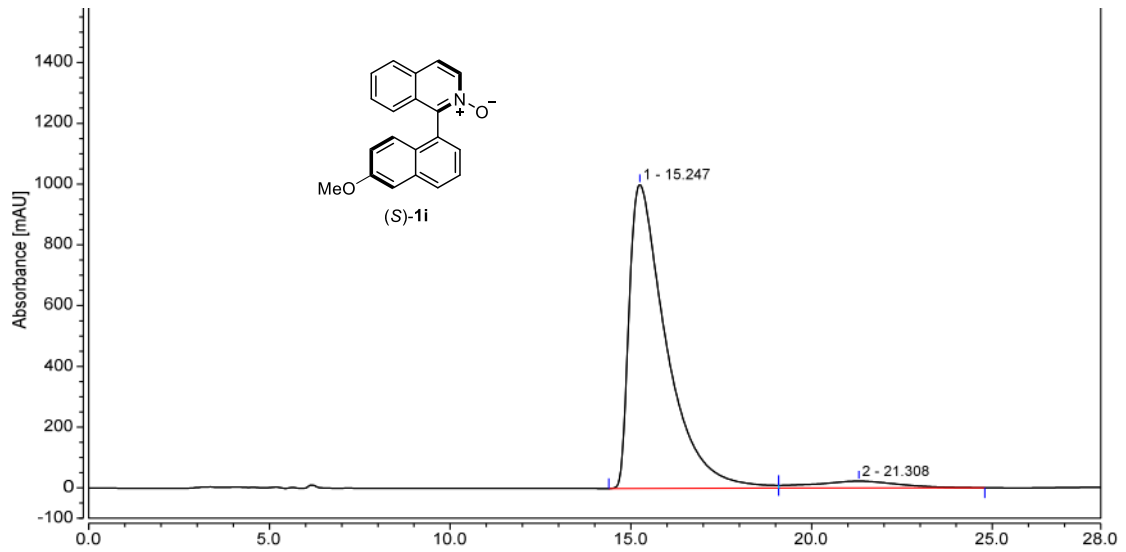

| Peak          | Retention Time min | Area mAU*min    | Height mAU      | Area %        | Height %      |
|---------------|--------------------|-----------------|-----------------|---------------|---------------|
| 1             | 15.247             | 1188.173        | 1000.062        | 95.00         | 97.78         |
| 2             | 21.308             | 62.535          | 22.672          | 5.00          | 2.22          |
| <b>Total:</b> |                    | <b>1250.708</b> | <b>1022.733</b> | <b>100.00</b> | <b>100.00</b> |

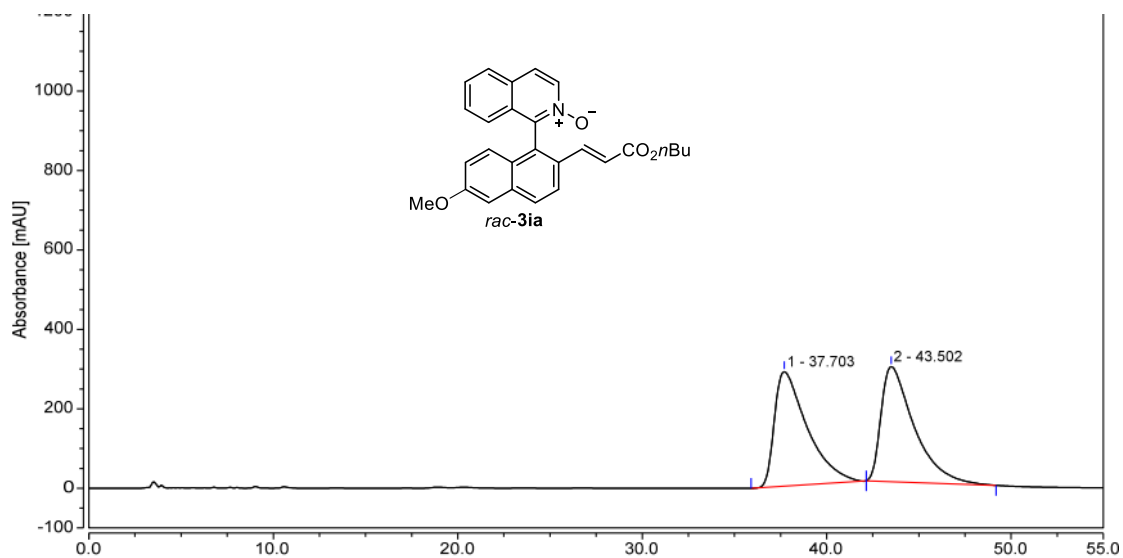

| Peak          | Retention Time min | Area mAU*min    | Height mAU     | Area %        | Height %      |
|---------------|--------------------|-----------------|----------------|---------------|---------------|
| 1             | 37.703             | 590.975         | 288.004        | 49.55         | 49.85         |
| 2             | 43.502             | 601.615         | 289.703        | 50.45         | 50.15         |
| <b>Total:</b> |                    | <b>1192.591</b> | <b>577.707</b> | <b>100.00</b> | <b>100.00</b> |

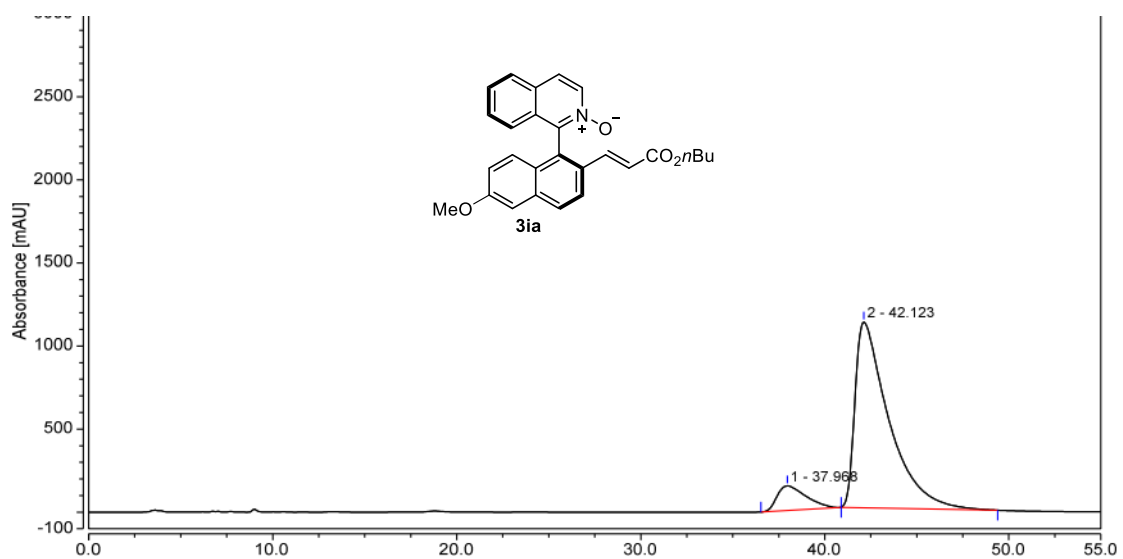

| Peak          | Retention Time min | Area mAU*min    | Height mAU      | Area %        | Height %      |
|---------------|--------------------|-----------------|-----------------|---------------|---------------|
| 1             | 37.968             | 265.932         | 147.588         | 10.06         | 11.67         |
| 2             | 42.123             | 2378.489        | 1117.331        | 89.94         | 88.33         |
| <b>Total:</b> |                    | <b>2644.420</b> | <b>1264.919</b> | <b>100.00</b> | <b>100.00</b> |

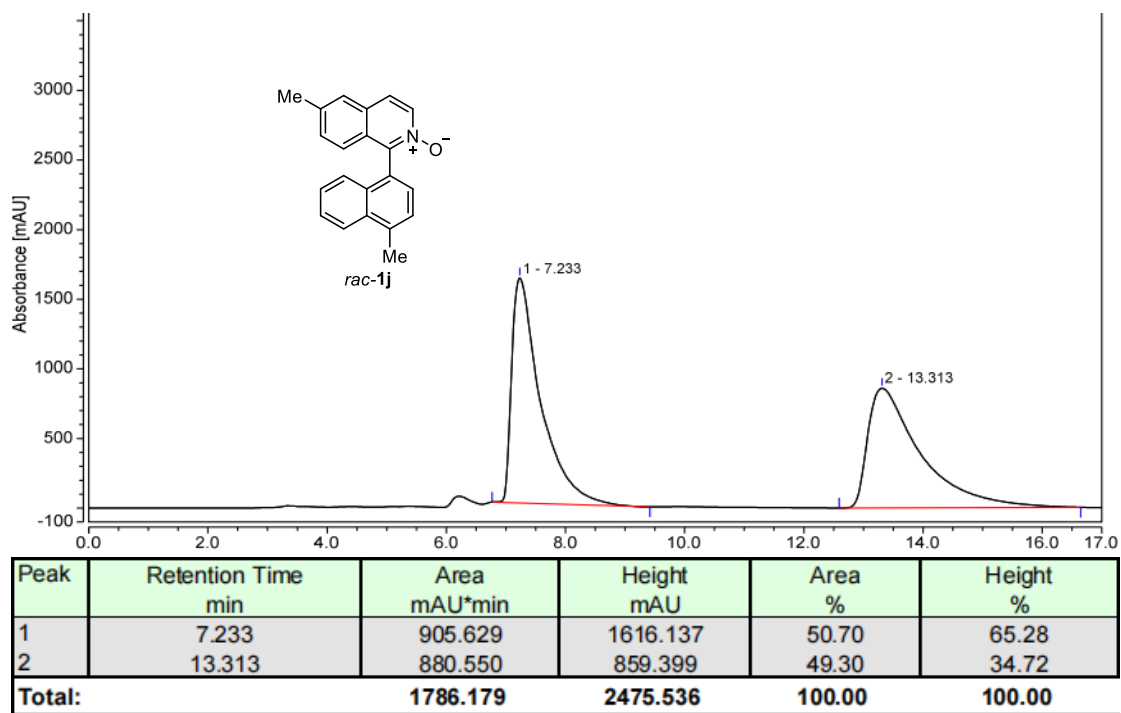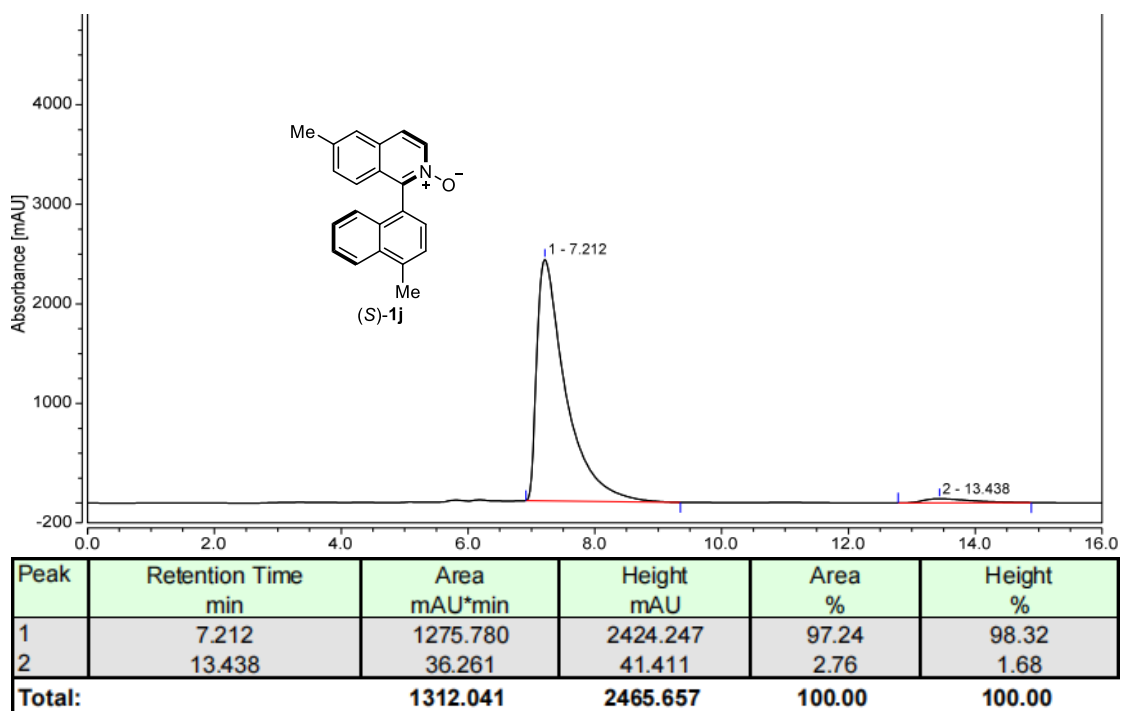

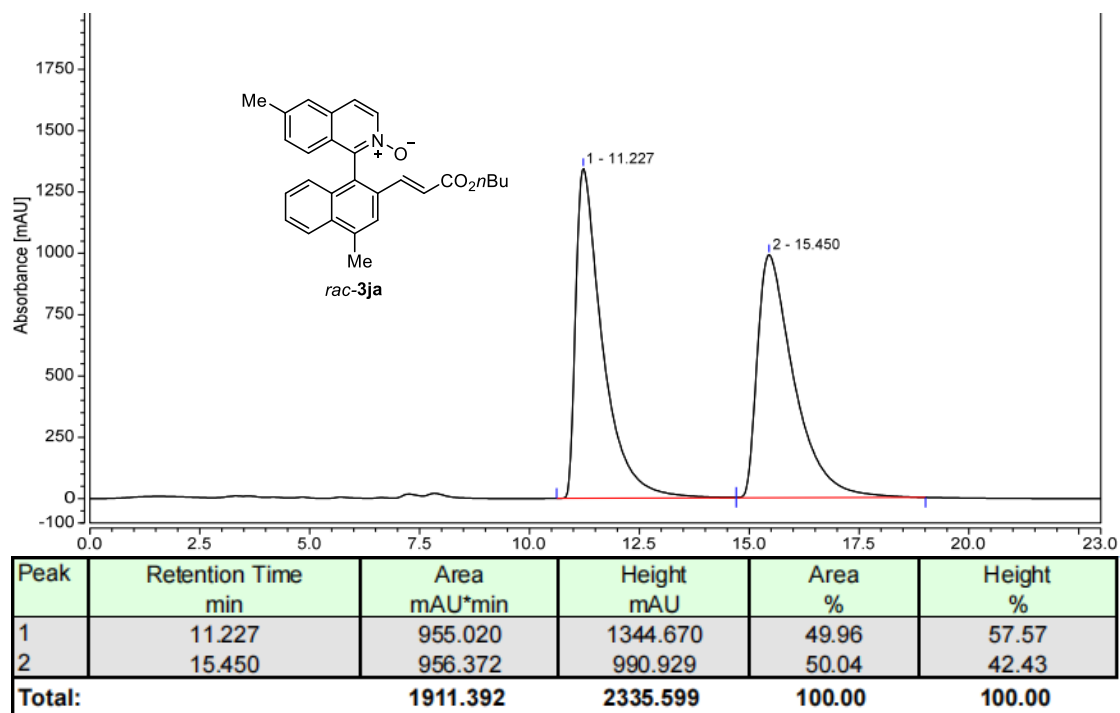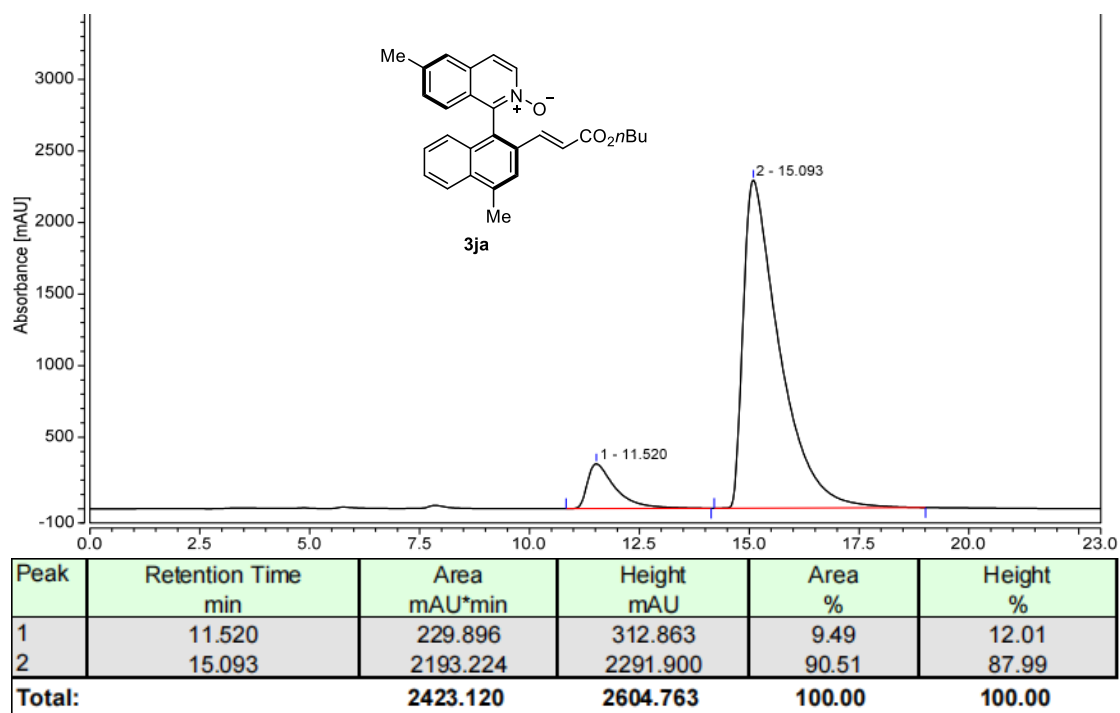

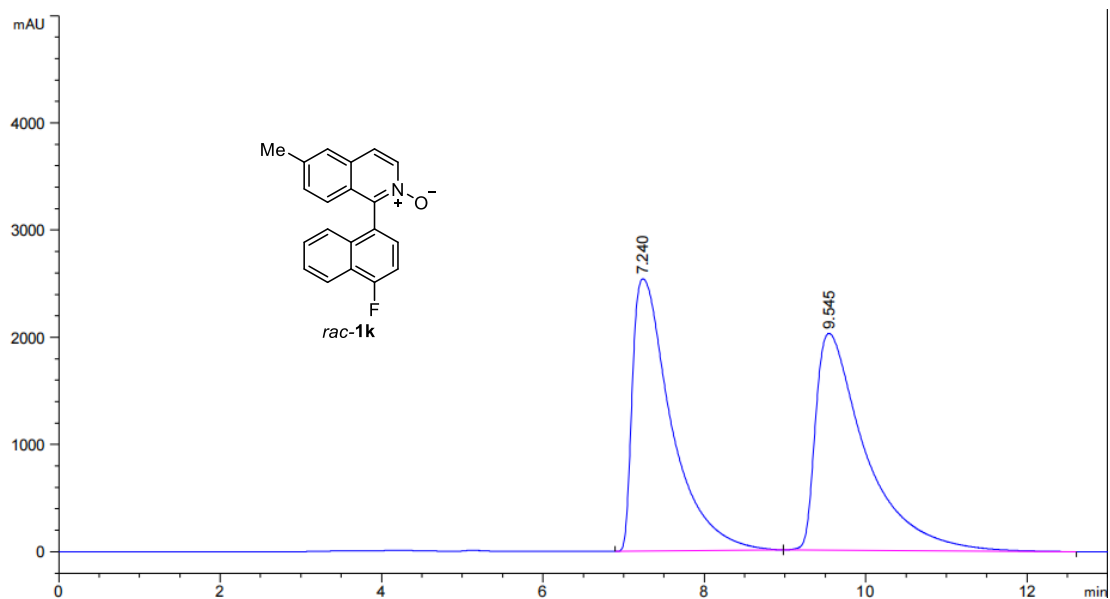

| Peak # | RetTime [min] | Type | Width [min] | Area [mAU*s] | Height [mAU] | Area %  |
|--------|---------------|------|-------------|--------------|--------------|---------|
| 1      | 7.240         | BB   | 0.4973      | 8.48346e4    | 2541.26807   | 49.4083 |
| 2      | 9.545         | BBA  | 0.6250      | 8.68664e4    | 2022.54419   | 50.5917 |

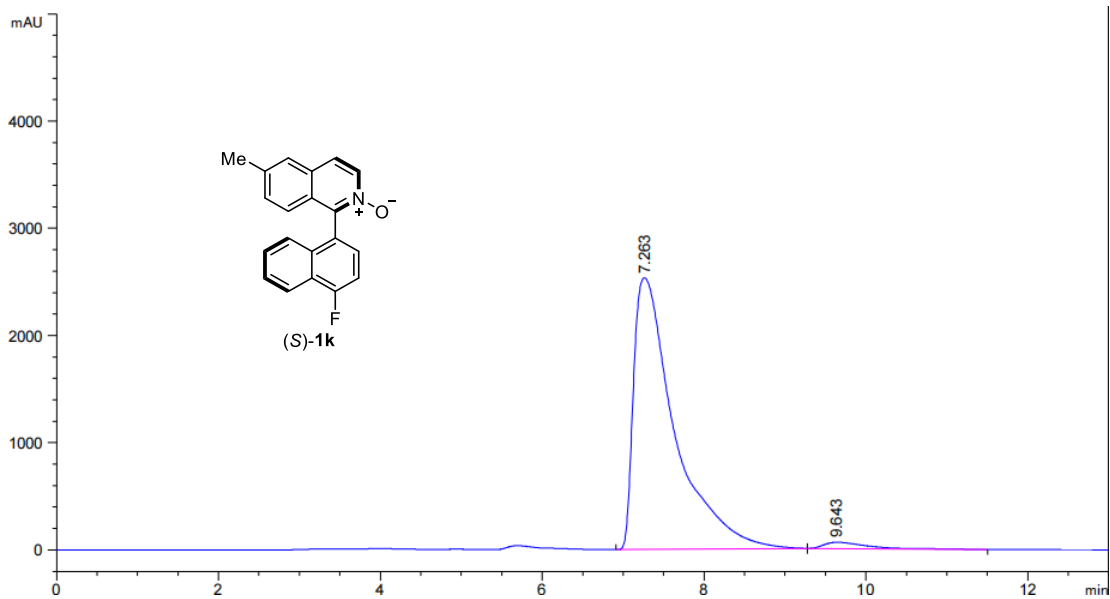

| Peak # | RetTime [min] | Type | Width [min] | Area [mAU*s] | Height [mAU] | Area %  |
|--------|---------------|------|-------------|--------------|--------------|---------|
| 1      | 7.263         | BB   | 0.5165      | 8.90464e4    | 2533.21924   | 97.6123 |
| 2      | 9.643         | BB   | 0.5490      | 2178.17139   | 58.77148     | 2.3877  |



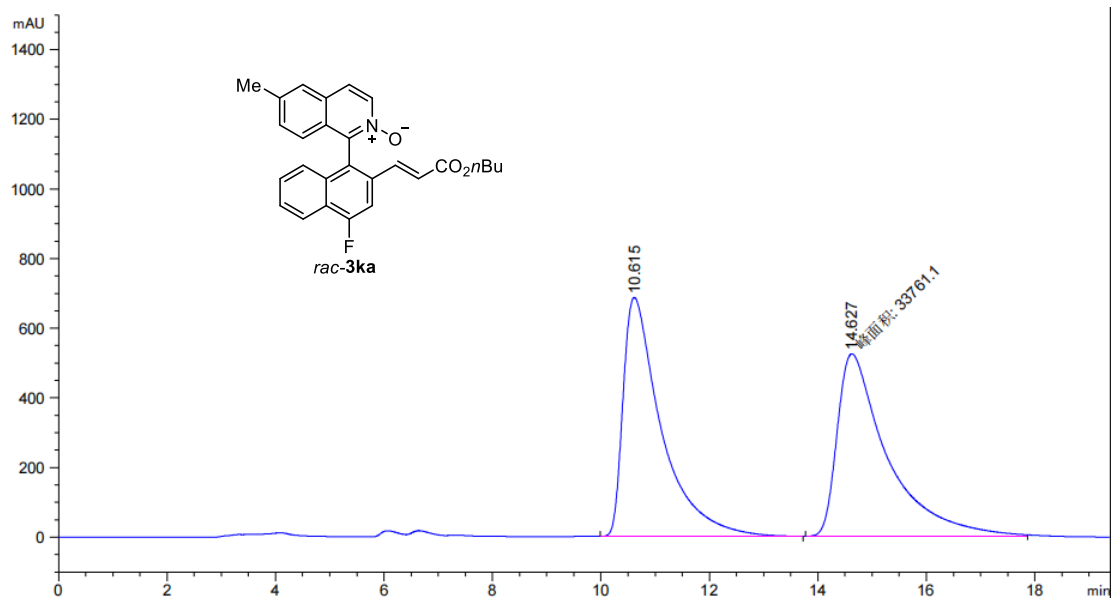

| Peak # | RetTime [min] | Type | Width [min] | Area [mAU*s] | Height [mAU] | Area %  |
|--------|---------------|------|-------------|--------------|--------------|---------|
| 1      | 10.615        | BB   | 0.7128      | 3.35137e4    | 686.08057    | 49.8161 |
| 2      | 14.627        | MM   | 1.0728      | 3.37611e4    | 524.48871    | 50.1839 |

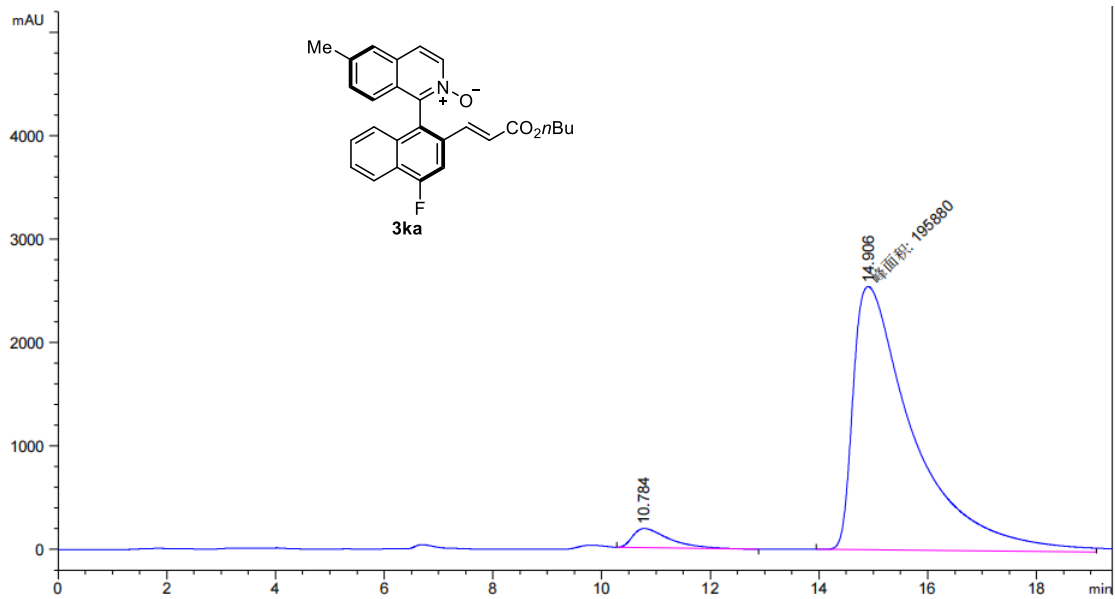

| Peak # | RetTime [min] | Type | Width [min] | Area [mAU*s] | Height [mAU] | Area %  |
|--------|---------------|------|-------------|--------------|--------------|---------|
| 1      | 10.784        | BB   | 0.6892      | 8552.08398   | 185.08560    | 4.1833  |
| 2      | 14.906        | MM   | 1.2842      | 1.95880e5    | 2542.13550   | 95.8167 |

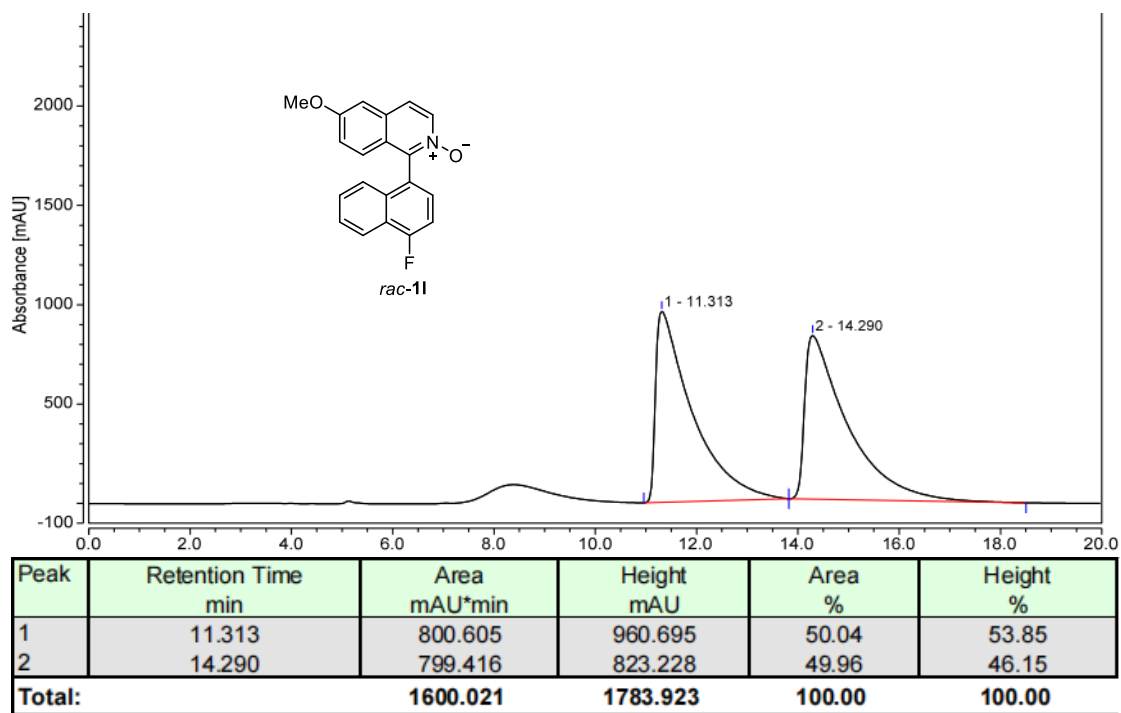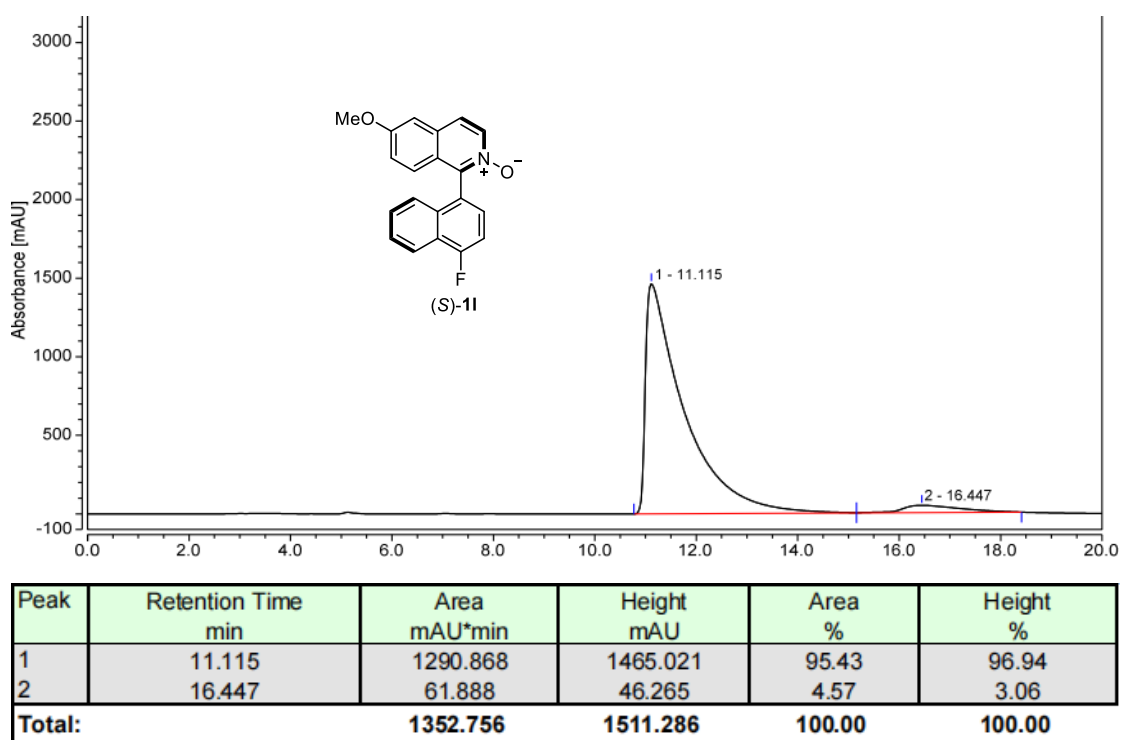

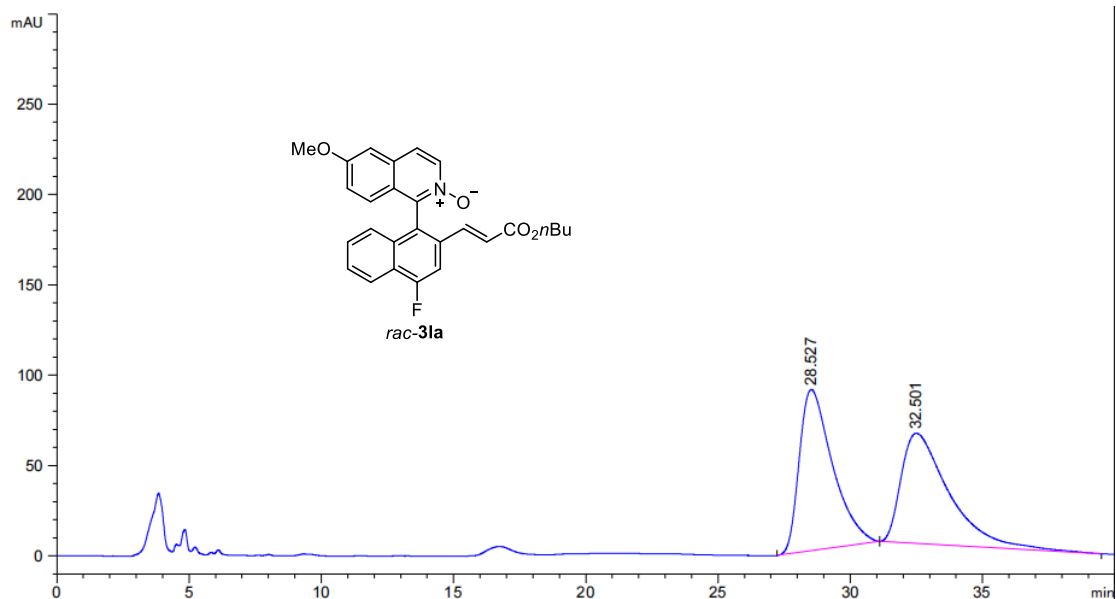

| Peak # | RetTime [min] | Type | Width [min] | Area [mAU*s] | Height [mAU] | Area %  |
|--------|---------------|------|-------------|--------------|--------------|---------|
| 1      | 28.527        | BB   | 1.3107      | 7798.38135   | 89.27493     | 50.3778 |
| 2      | 32.501        | BB   | 1.7655      | 7681.41699   | 60.97953     | 49.6222 |

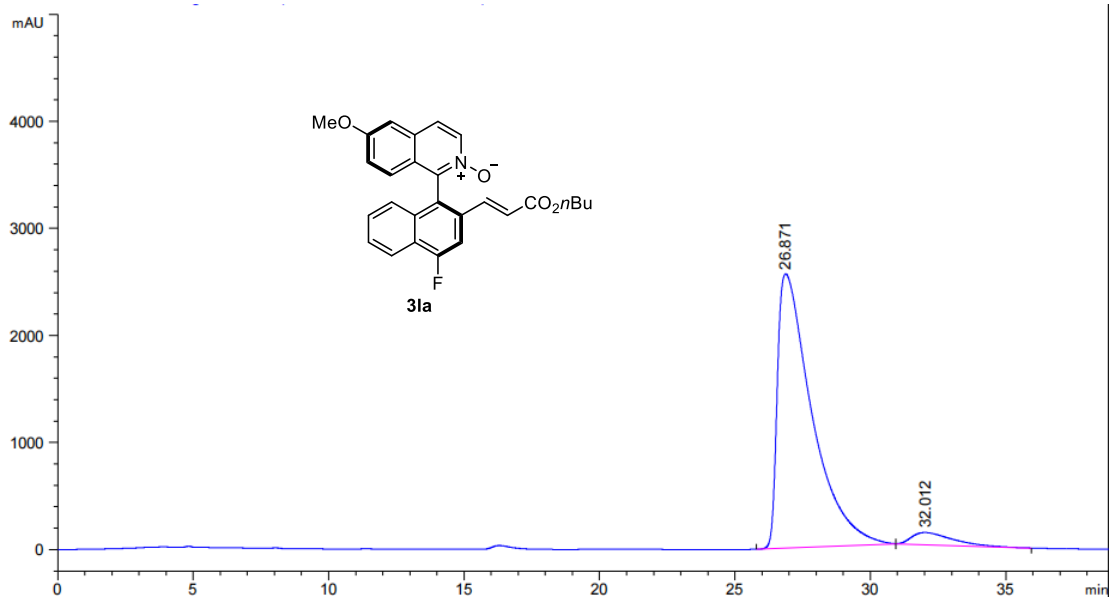

| Peak # | RetTime [min] | Type | Width [min] | Area [mAU*s] | Height [mAU] | Area %  |
|--------|---------------|------|-------------|--------------|--------------|---------|
| 1      | 26.871        | BB   | 1.2127      | 2.25932e5    | 2561.47778   | 95.0271 |
| 2      | 32.012        | BBA  | 1.5541      | 1.18233e4    | 113.04312    | 4.9729  |

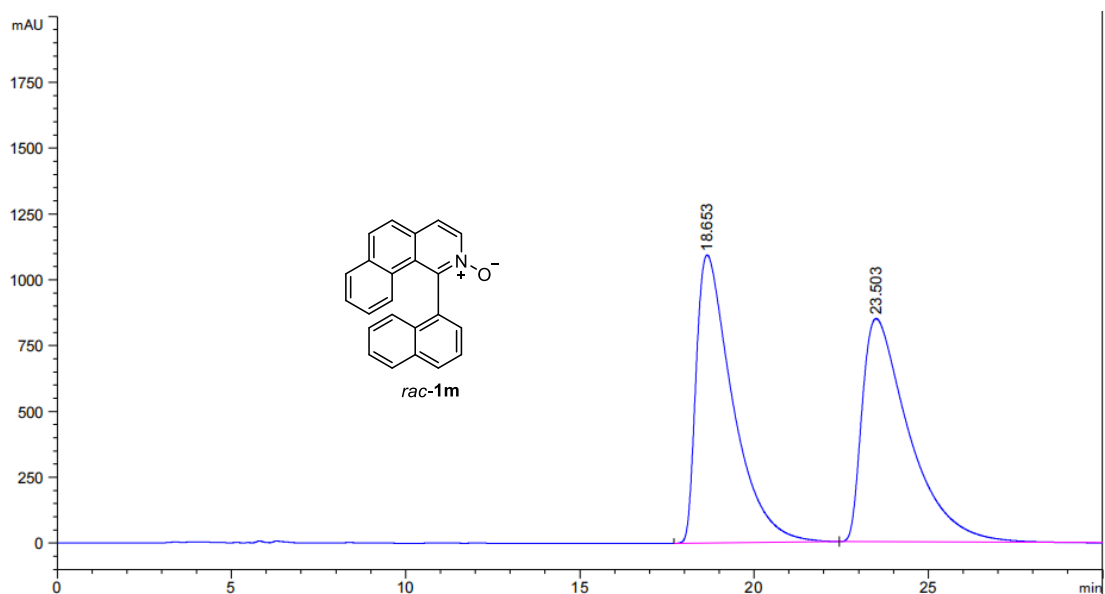

| Peak # | RetTime [min] | Type | Width [min] | Area [mAU*s] | Height [mAU] | Area %  |
|--------|---------------|------|-------------|--------------|--------------|---------|
| 1      | 18.653        | BB   | 1.0735      | 7.93289e4    | 1093.89624   | 49.9331 |
| 2      | 23.503        | BBA  | 1.3799      | 7.95414e4    | 848.07874    | 50.0669 |

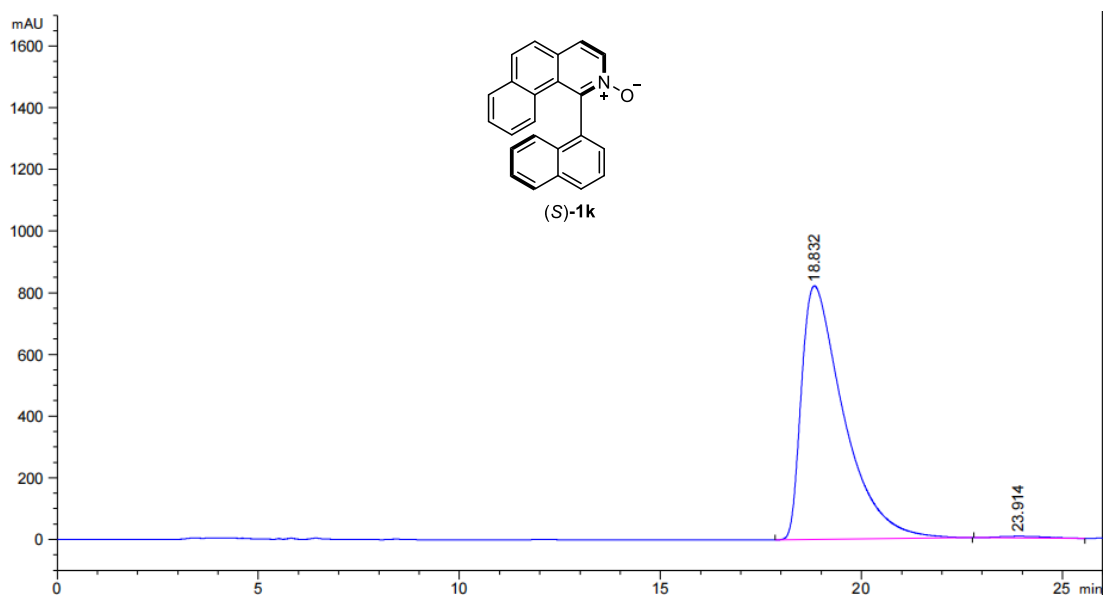

| Peak # | RetTime [min] | Type | Width [min] | Area [mAU*s] | Height [mAU] | Area %  |
|--------|---------------|------|-------------|--------------|--------------|---------|
| 1      | 18.832        | BB   | 1.0838      | 6.00315e4    | 822.00616    | 99.2638 |
| 2      | 23.914        | BB   | 0.9801      | 445.22940    | 5.35582      | 0.7362  |

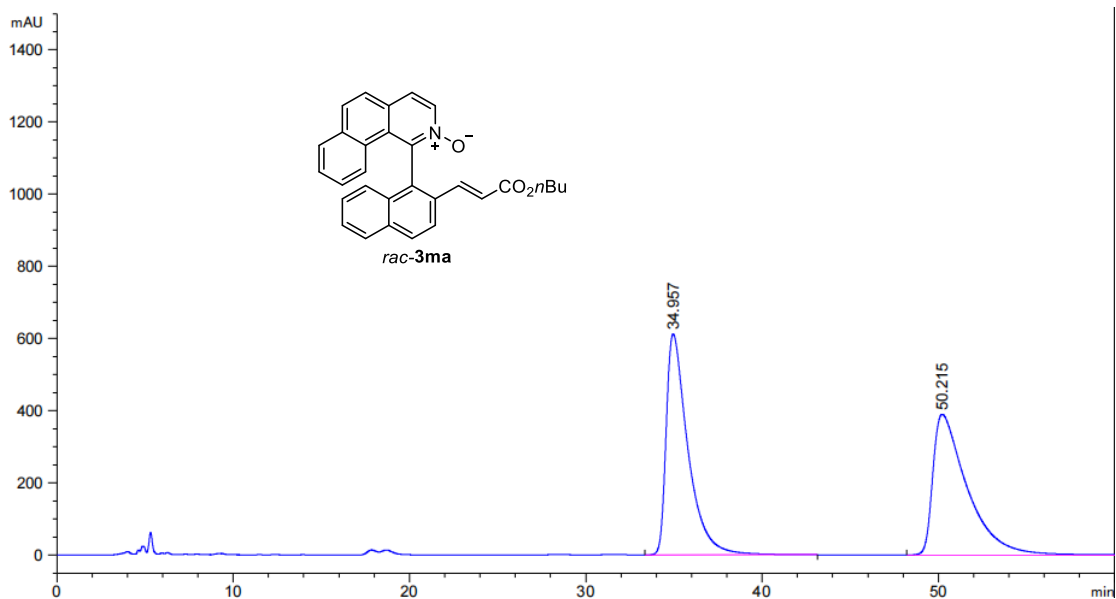

| Peak # | RetTime [min] | Type | Width [min] | Area [mAU*s] | Height [mAU] | Area %  |
|--------|---------------|------|-------------|--------------|--------------|---------|
| 1      | 34.957        | BB   | 1.2431      | 5.26861e4    | 612.17279    | 50.0602 |
| 2      | 50.215        | BB   | 1.8795      | 5.25593e4    | 389.73456    | 49.9398 |

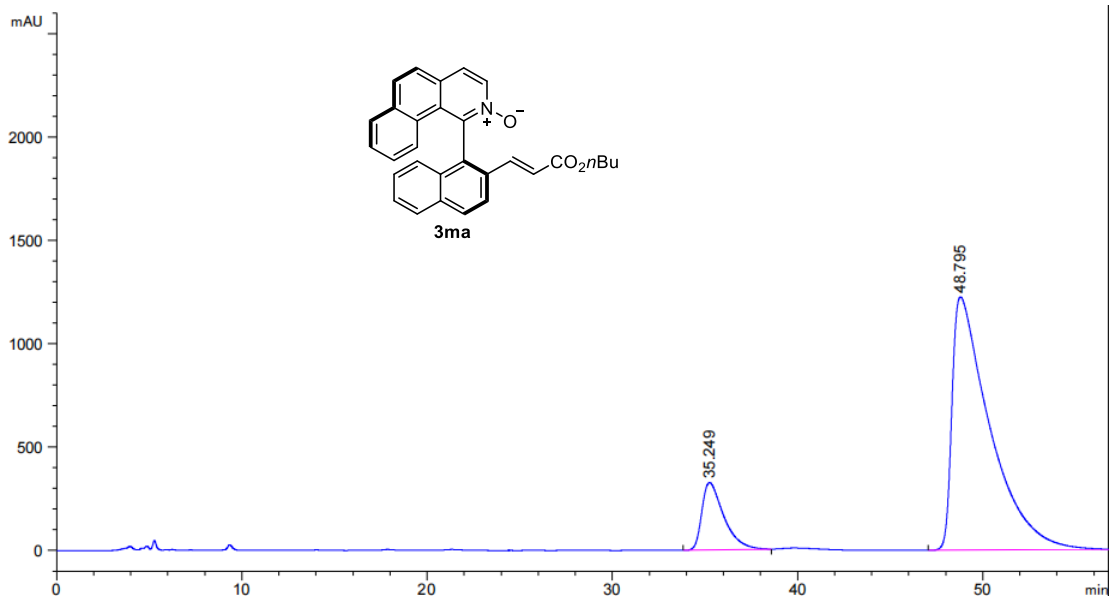

| Peak # | RetTime [min] | Type | Width [min] | Area [mAU*s] | Height [mAU] | Area %  |
|--------|---------------|------|-------------|--------------|--------------|---------|
| 1      | 35.249        | BB   | 1.2270      | 2.68169e4    | 326.29929    | 13.3772 |
| 2      | 48.795        | BBA  | 1.9100      | 1.73650e5    | 1225.27979   | 86.6228 |

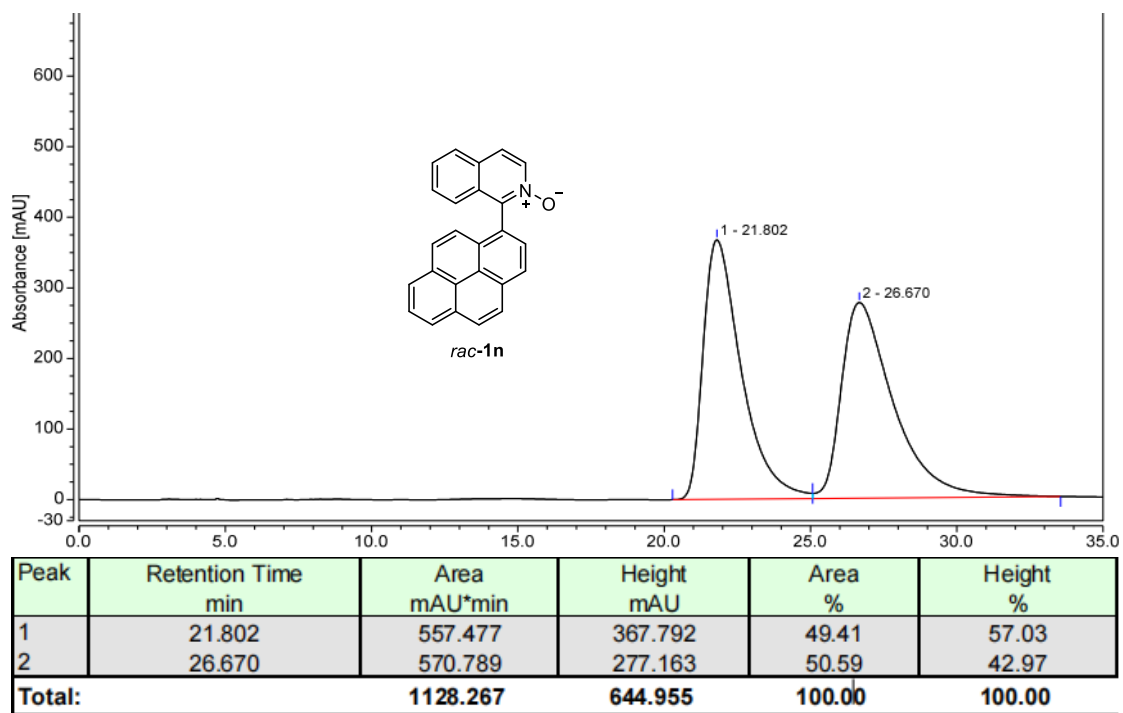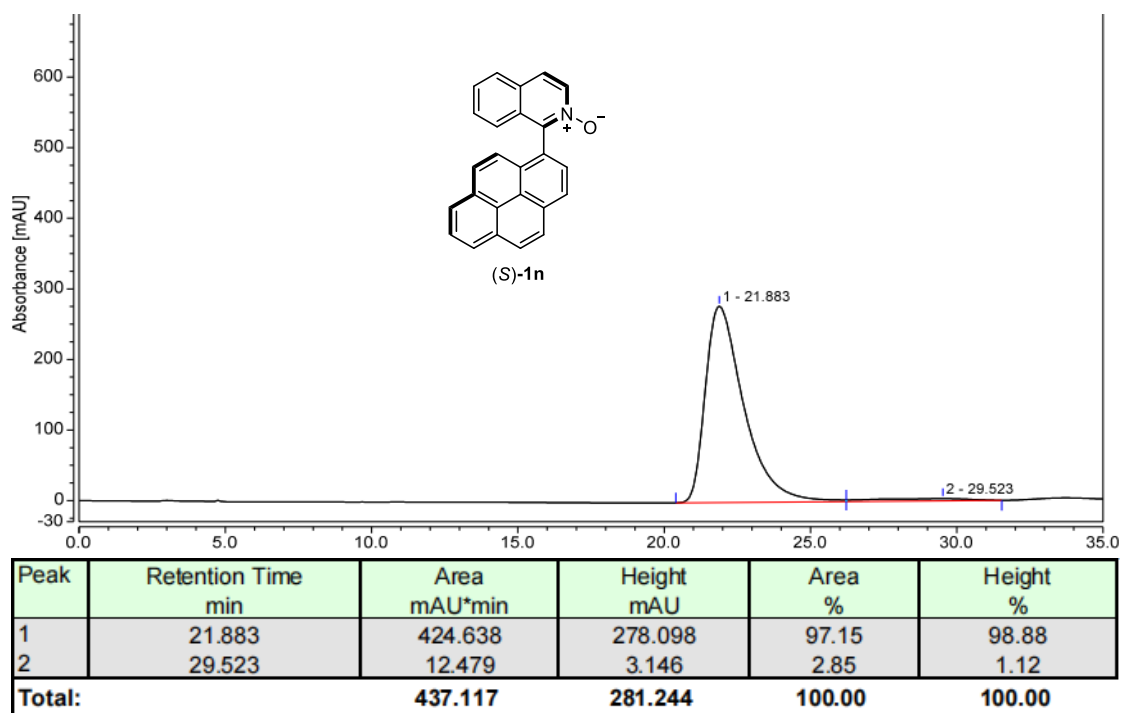

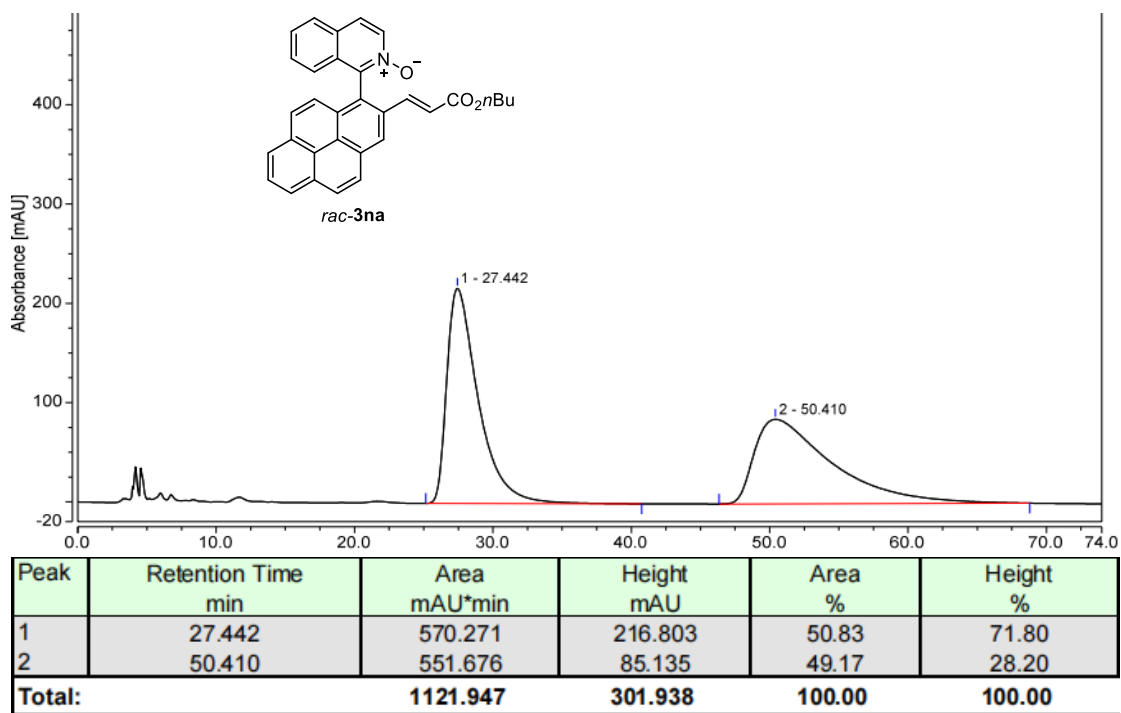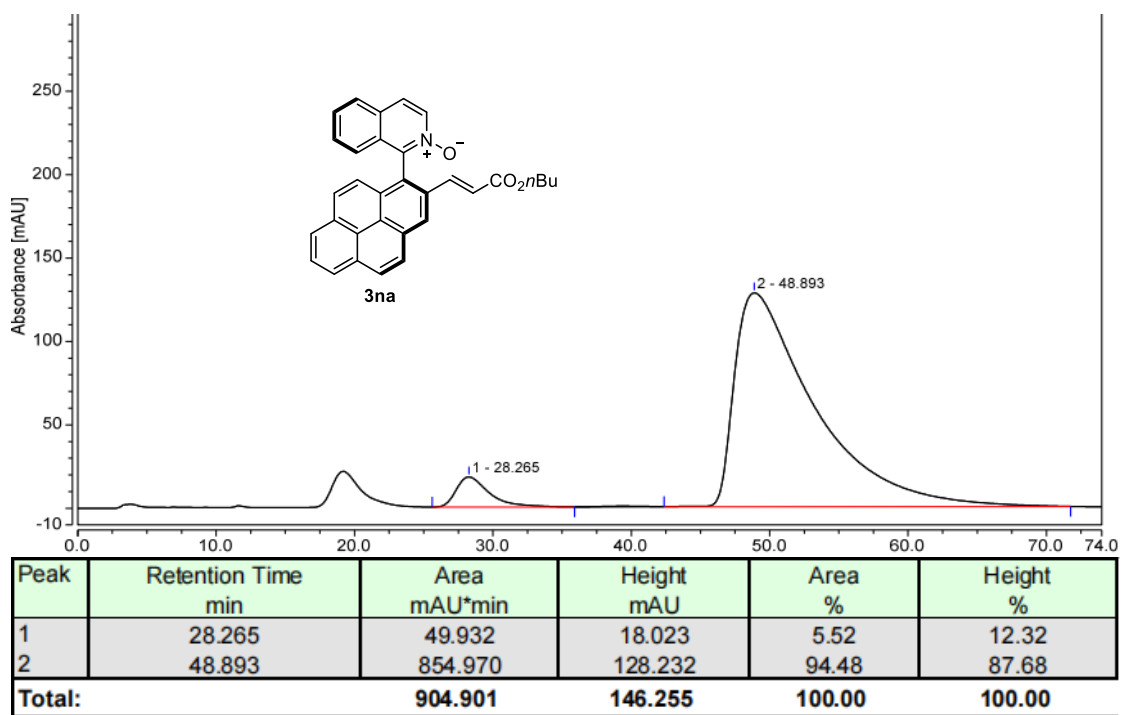

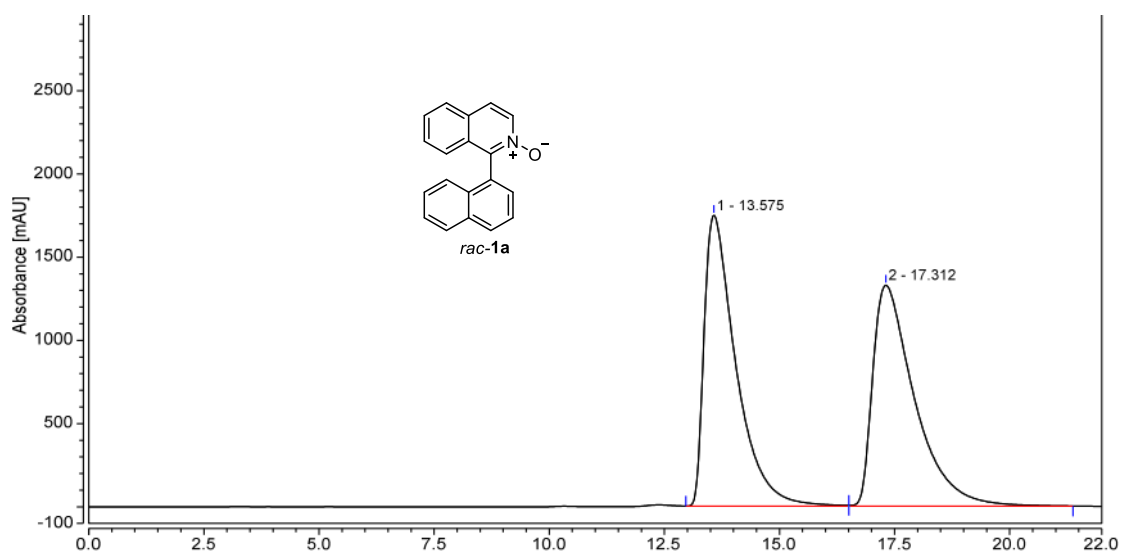

| Peak          | Retention Time<br>min | Area<br>mAU*min | Height<br>mAU   | Area<br>%     | Height<br>%   |
|---------------|-----------------------|-----------------|-----------------|---------------|---------------|
| 1             | 13.575                | 1396.154        | 1747.666        | 50.03         | 56.83         |
| 2             | 17.312                | 1394.660        | 1327.380        | 49.97         | 43.17         |
| <b>Total:</b> |                       | <b>2790.814</b> | <b>3075.046</b> | <b>100.00</b> | <b>100.00</b> |

#### HPLC spectra of recovered (*S*)-1a, for 3ab

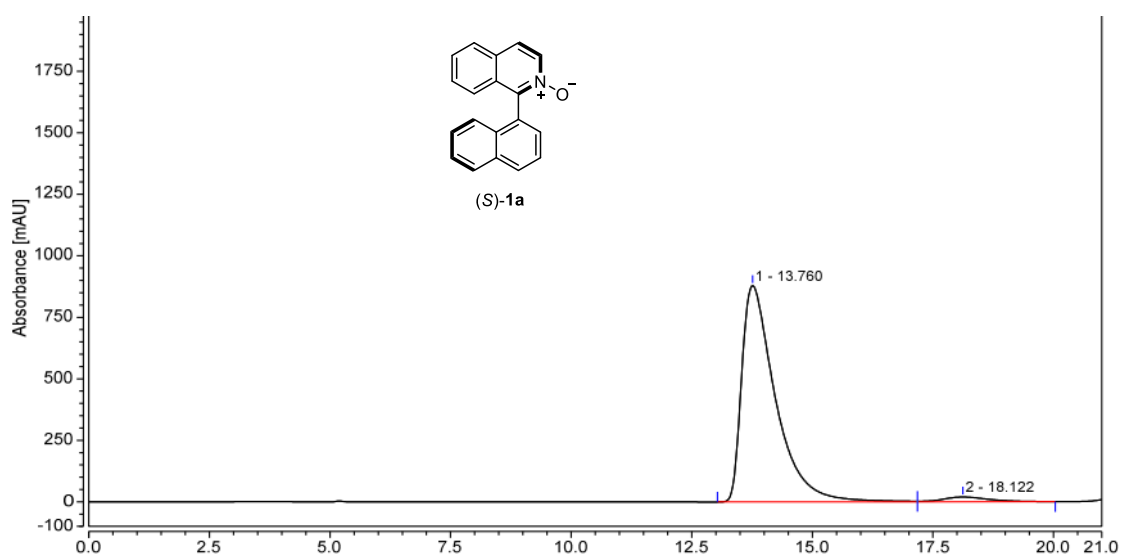

| Peak          | Retention Time<br>min | Area<br>mAU*min | Height<br>mAU  | Area<br>%     | Height<br>%   |
|---------------|-----------------------|-----------------|----------------|---------------|---------------|
| 1             | 13.760                | 713.110         | 879.583        | 97.23         | 97.87         |
| 2             | 18.122                | 20.315          | 19.105         | 2.77          | 2.13          |
| <b>Total:</b> |                       | <b>733.425</b>  | <b>898.688</b> | <b>100.00</b> | <b>100.00</b> |



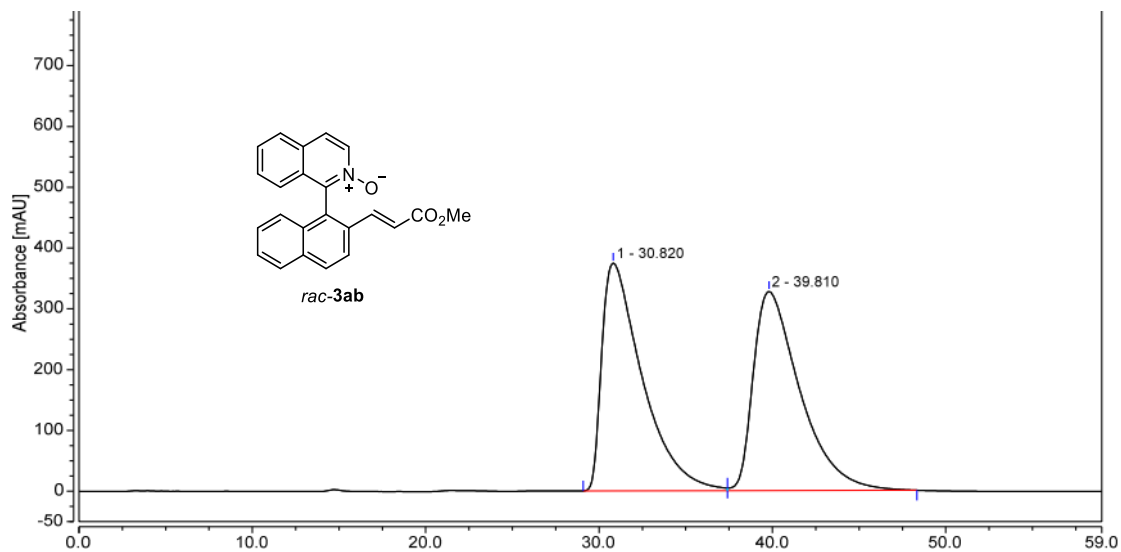

| Peak          | Retention Time min | Area mAU*min    | Height mAU     | Area %        | Height %      |
|---------------|--------------------|-----------------|----------------|---------------|---------------|
| 1             | 30.820             | 1015.130        | 374.518        | 49.84         | 53.37         |
| 2             | 39.810             | 1021.818        | 327.269        | 50.16         | 46.63         |
| <b>Total:</b> |                    | <b>2036.948</b> | <b>701.787</b> | <b>100.00</b> | <b>100.00</b> |

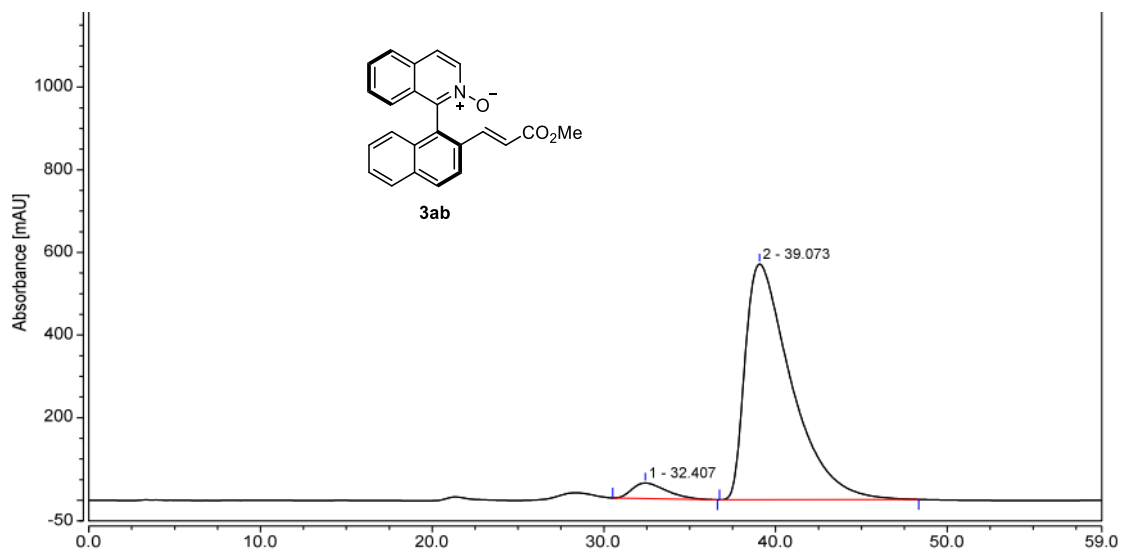

| Peak          | Retention Time min | Area mAU*min    | Height mAU     | Area %        | Height %      |
|---------------|--------------------|-----------------|----------------|---------------|---------------|
| 1             | 32.407             | 87.827          | 37.554         | 4.71          | 6.17          |
| 2             | 39.073             | 1777.304        | 570.744        | 95.29         | 93.83         |
| <b>Total:</b> |                    | <b>1865.131</b> | <b>608.298</b> | <b>100.00</b> | <b>100.00</b> |

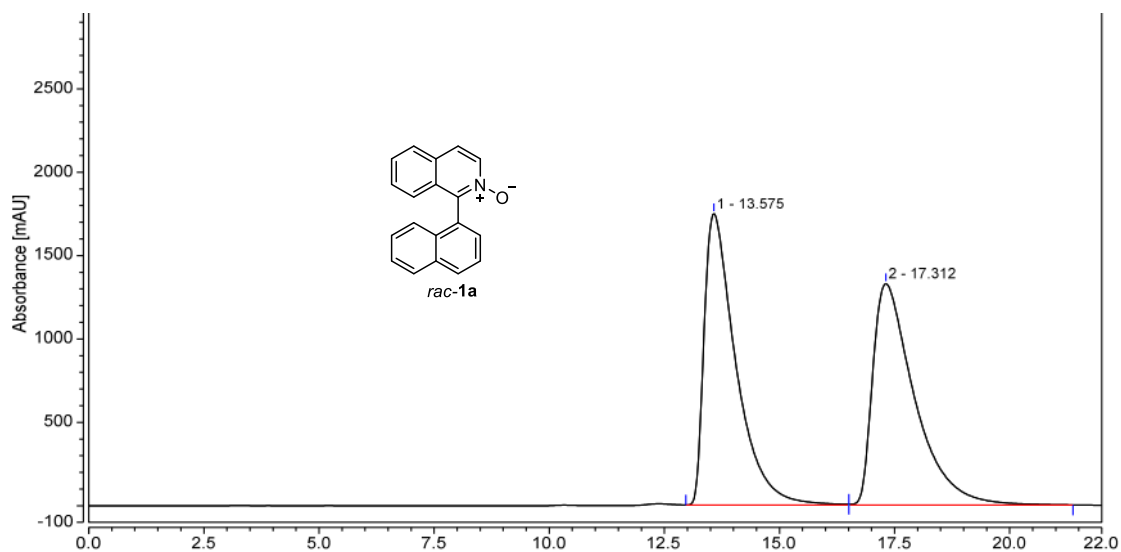

| Peak          | Retention Time min | Area mAU*min    | Height mAU      | Area %        | Height %      |
|---------------|--------------------|-----------------|-----------------|---------------|---------------|
| 1             | 13.575             | 1396.154        | 1747.666        | 50.03         | 56.83         |
| 2             | 17.312             | 1394.660        | 1327.380        | 49.97         | 43.17         |
| <b>Total:</b> |                    | <b>2790.814</b> | <b>3075.046</b> | <b>100.00</b> | <b>100.00</b> |

#### HPLC spectra of recovered (*S*)-1a, for 3ac

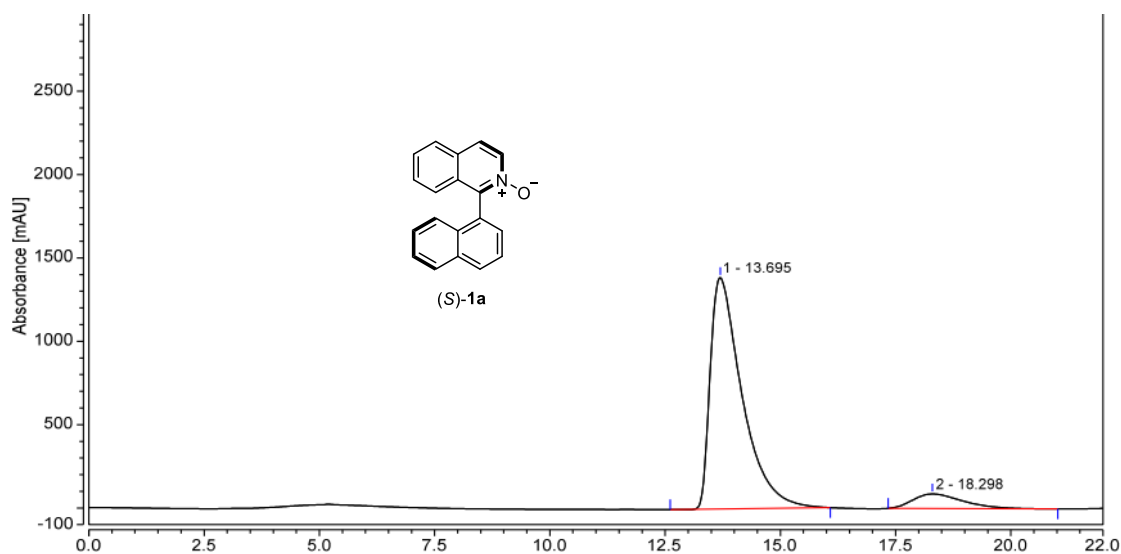

| Peak          | Retention Time min | Area mAU*min    | Height mAU      | Area %        | Height %      |
|---------------|--------------------|-----------------|-----------------|---------------|---------------|
| 1             | 13.695             | 1110.108        | 1387.652        | 91.01         | 94.09         |
| 2             | 18.298             | 109.612         | 87.085          | 8.99          | 5.91          |
| <b>Total:</b> |                    | <b>1219.720</b> | <b>1474.737</b> | <b>100.00</b> | <b>100.00</b> |

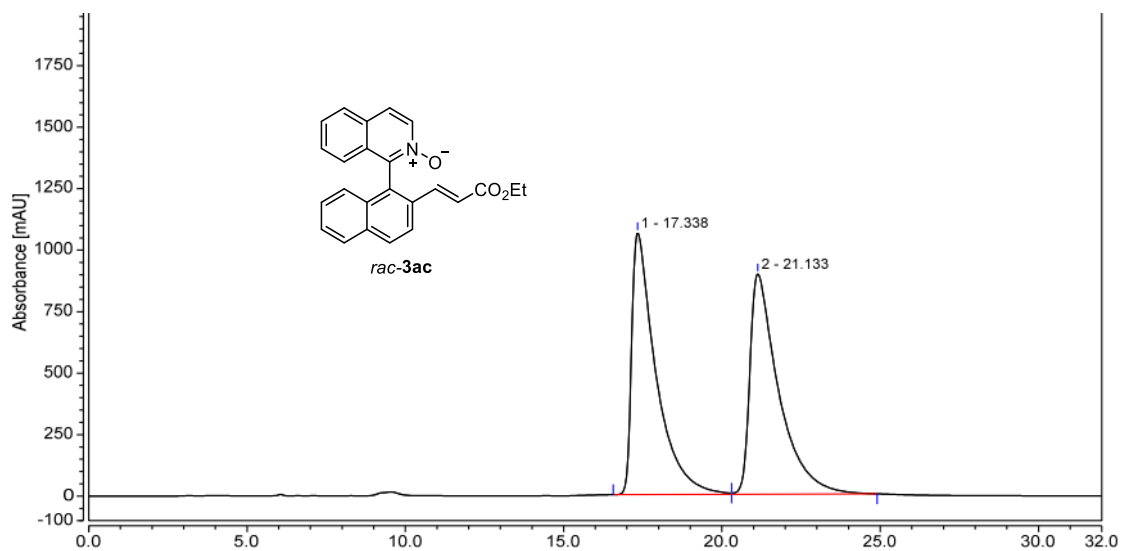

| Peak          | Retention Time min | Area mAU*min    | Height mAU      | Area %        | Height %      |
|---------------|--------------------|-----------------|-----------------|---------------|---------------|
| 1             | 17.338             | 942.010         | 1065.476        | 50.03         | 54.32         |
| 2             | 21.133             | 940.959         | 895.981         | 49.97         | 45.68         |
| <b>Total:</b> |                    | <b>1882.970</b> | <b>1961.457</b> | <b>100.00</b> | <b>100.00</b> |

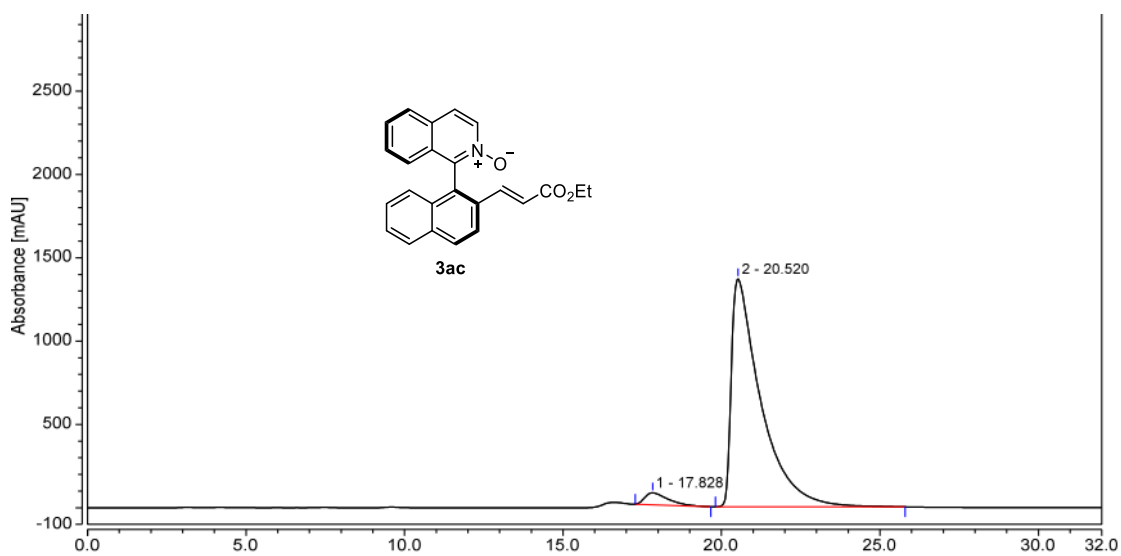

| Peak          | Retention Time min | Area mAU*min    | Height mAU      | Area %        | Height %      |
|---------------|--------------------|-----------------|-----------------|---------------|---------------|
| 1             | 17.828             | 61.388          | 71.644          | 4.00          | 4.97          |
| 2             | 20.520             | 1472.966        | 1368.792        | 96.00         | 95.03         |
| <b>Total:</b> |                    | <b>1534.355</b> | <b>1440.436</b> | <b>100.00</b> | <b>100.00</b> |

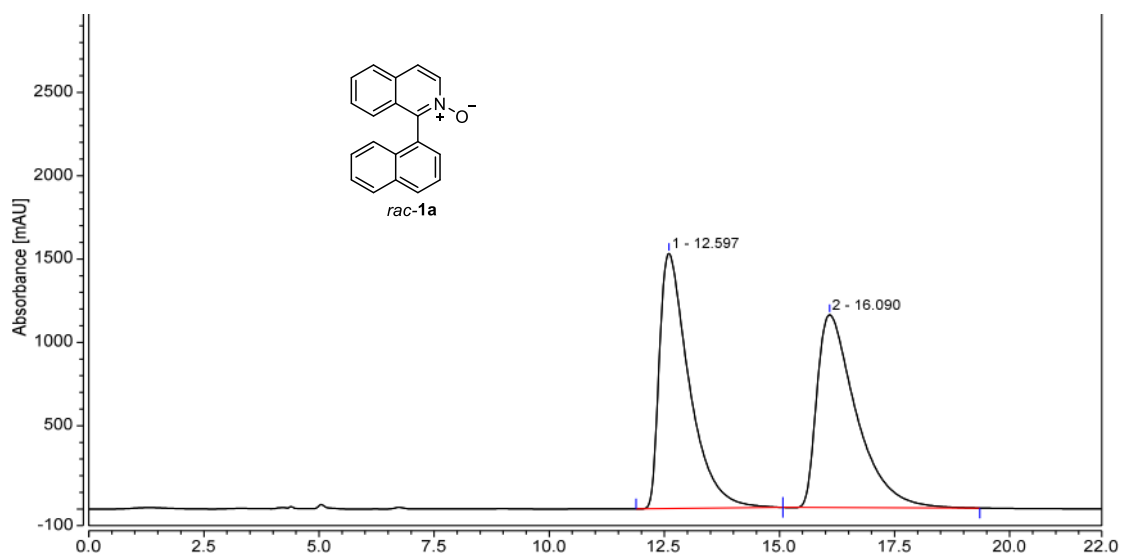

| Peak          | Retention Time min | Area mAU*min    | Height mAU      | Area %        | Height %      |
|---------------|--------------------|-----------------|-----------------|---------------|---------------|
| 1             | 12.597             | 1149.616        | 1531.971        | 50.15         | 56.97         |
| 2             | 16.090             | 1142.765        | 1157.232        | 49.85         | 43.03         |
| <b>Total:</b> |                    | <b>2292.381</b> | <b>2689.203</b> | <b>100.00</b> | <b>100.00</b> |

#### HPLC spectra of recovered (*S*)-1a, for 3ad

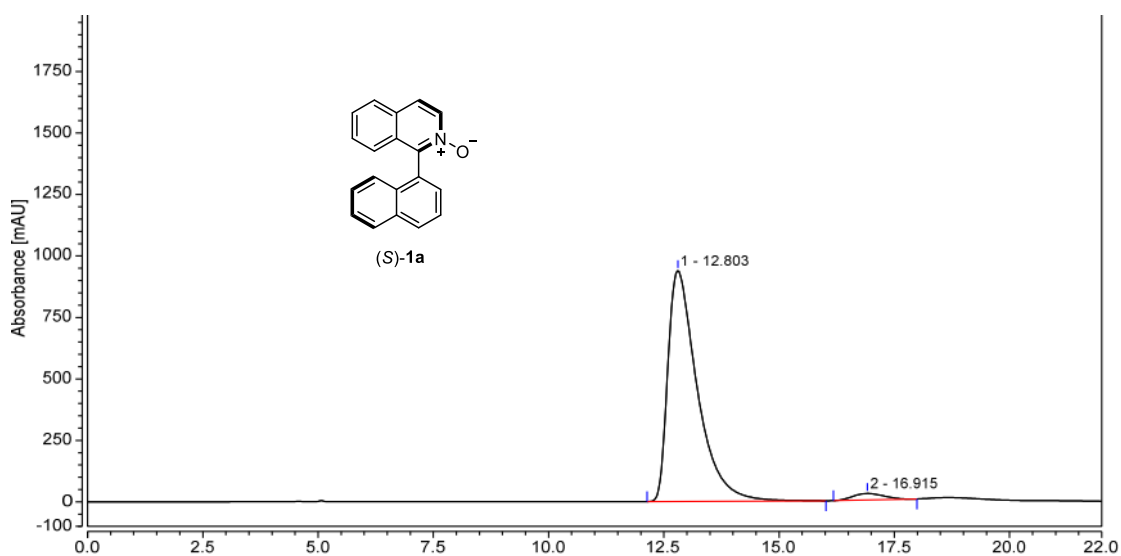

| Peak          | Retention Time min | Area mAU*min   | Height mAU     | Area %        | Height %      |
|---------------|--------------------|----------------|----------------|---------------|---------------|
| 1             | 12.803             | 694.912        | 939.073        | 97.13         | 97.26         |
| 2             | 16.915             | 20.522         | 26.423         | 2.87          | 2.74          |
| <b>Total:</b> |                    | <b>715.434</b> | <b>965.496</b> | <b>100.00</b> | <b>100.00</b> |

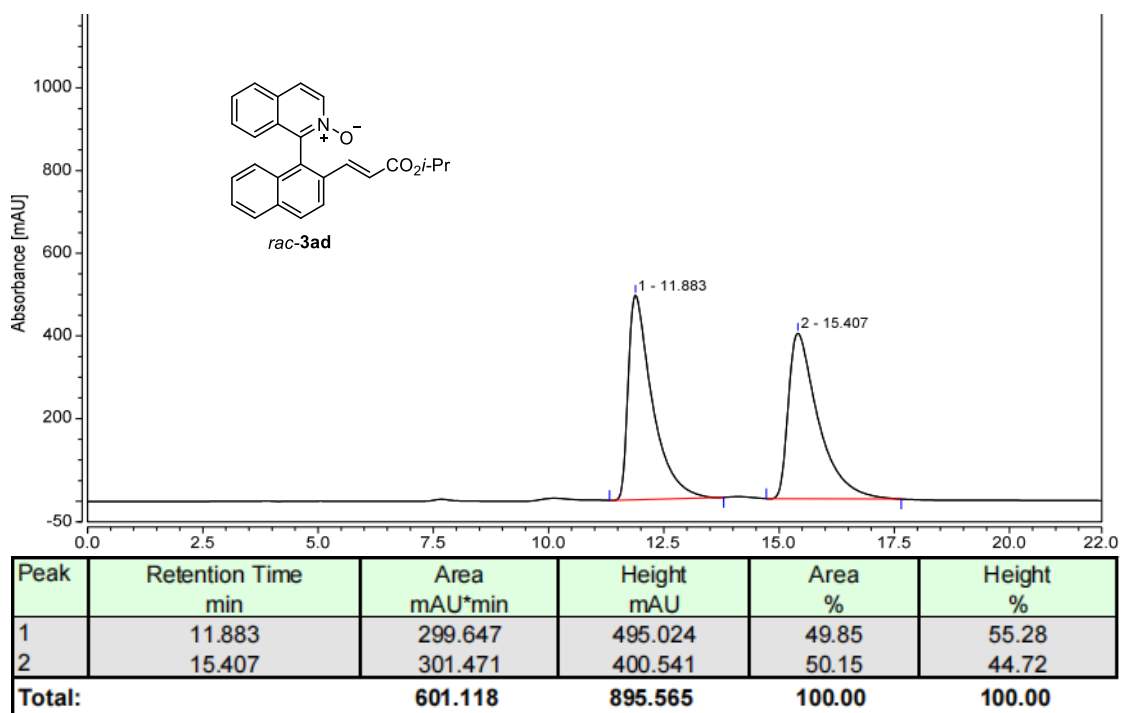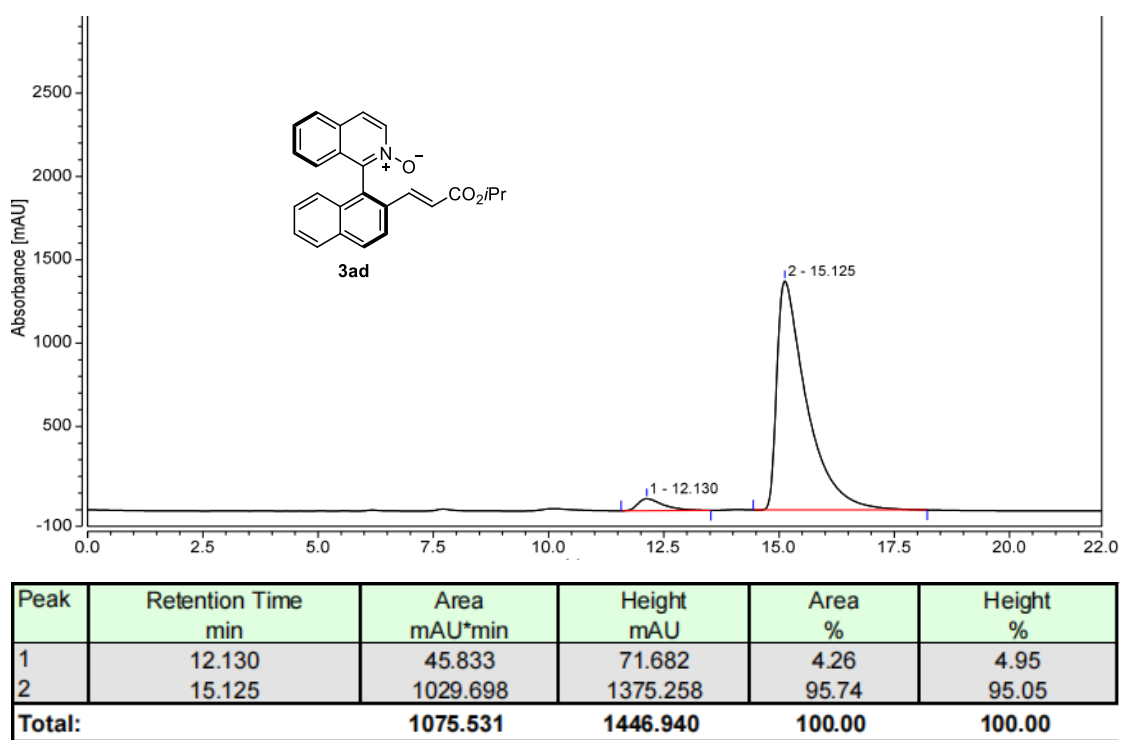

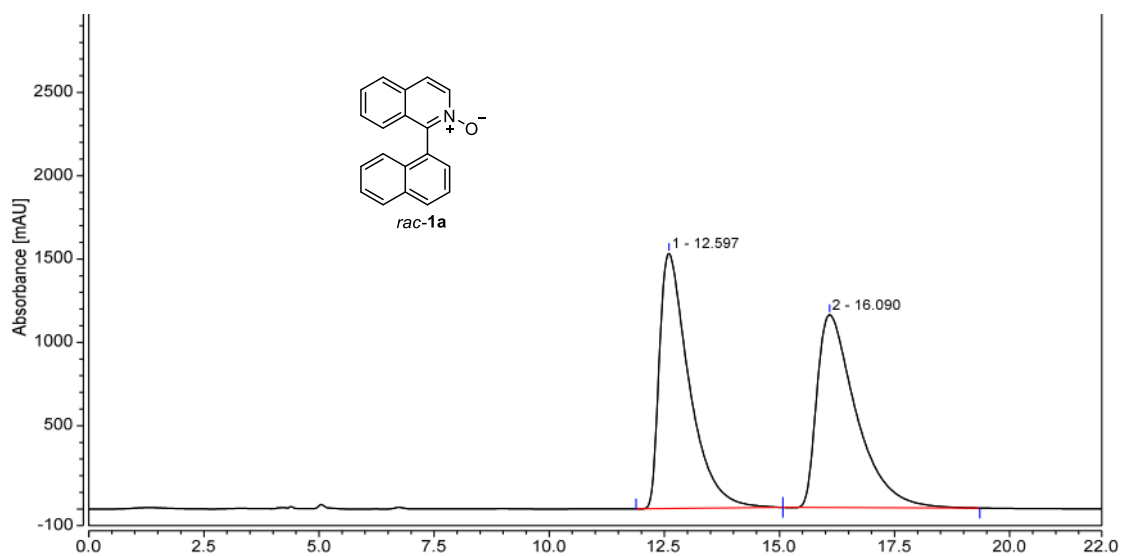

| Peak          | Retention Time min | Area mAU*min    | Height mAU      | Area %        | Height %      |
|---------------|--------------------|-----------------|-----------------|---------------|---------------|
| 1             | 12.597             | 1149.616        | 1531.971        | 50.15         | 56.97         |
| 2             | 16.090             | 1142.765        | 1157.232        | 49.85         | 43.03         |
| <b>Total:</b> |                    | <b>2292.381</b> | <b>2689.203</b> | <b>100.00</b> | <b>100.00</b> |

#### HPLC spectra of recovered (*S*)-1a, for 3ae

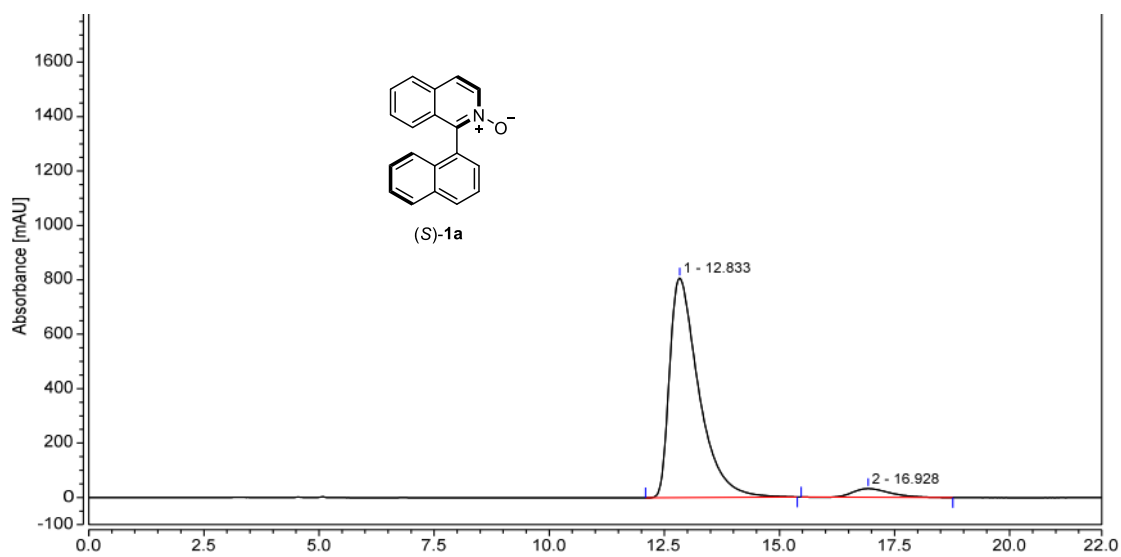

| Peak          | Retention Time min | Area mAU*min   | Height mAU     | Area %        | Height %      |
|---------------|--------------------|----------------|----------------|---------------|---------------|
| 1             | 12.833             | 590.999        | 807.113        | 95.27         | 96.22         |
| 2             | 16.928             | 29.337         | 31.715         | 4.73          | 3.78          |
| <b>Total:</b> |                    | <b>620.336</b> | <b>838.828</b> | <b>100.00</b> | <b>100.00</b> |

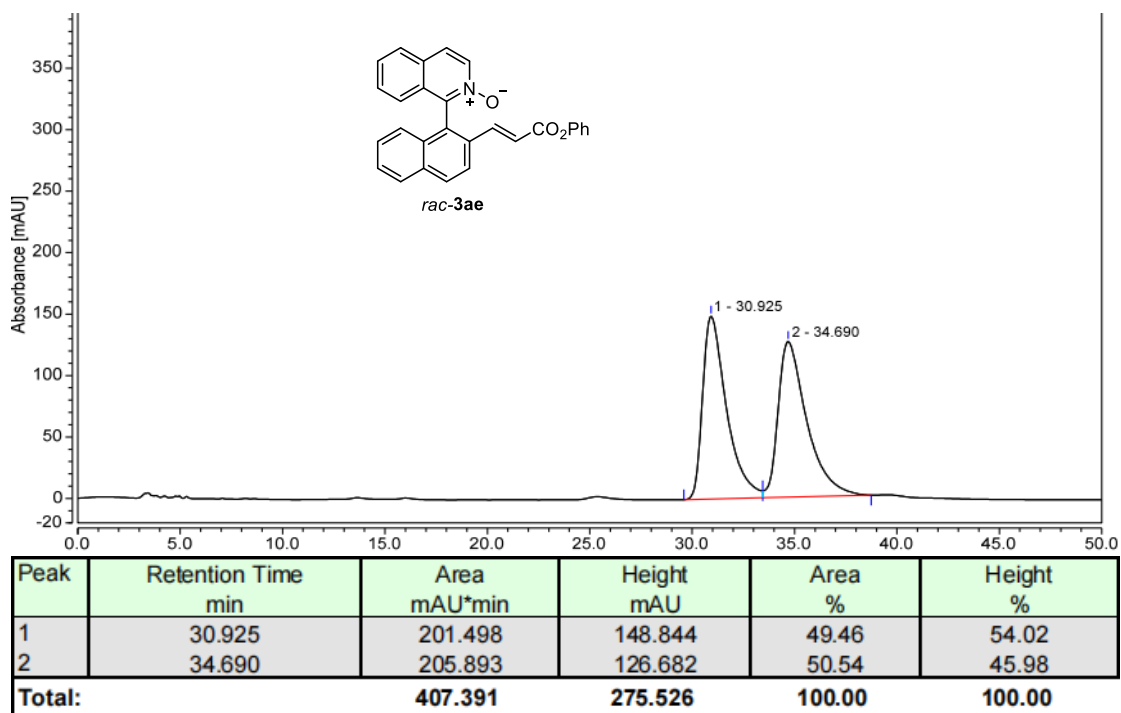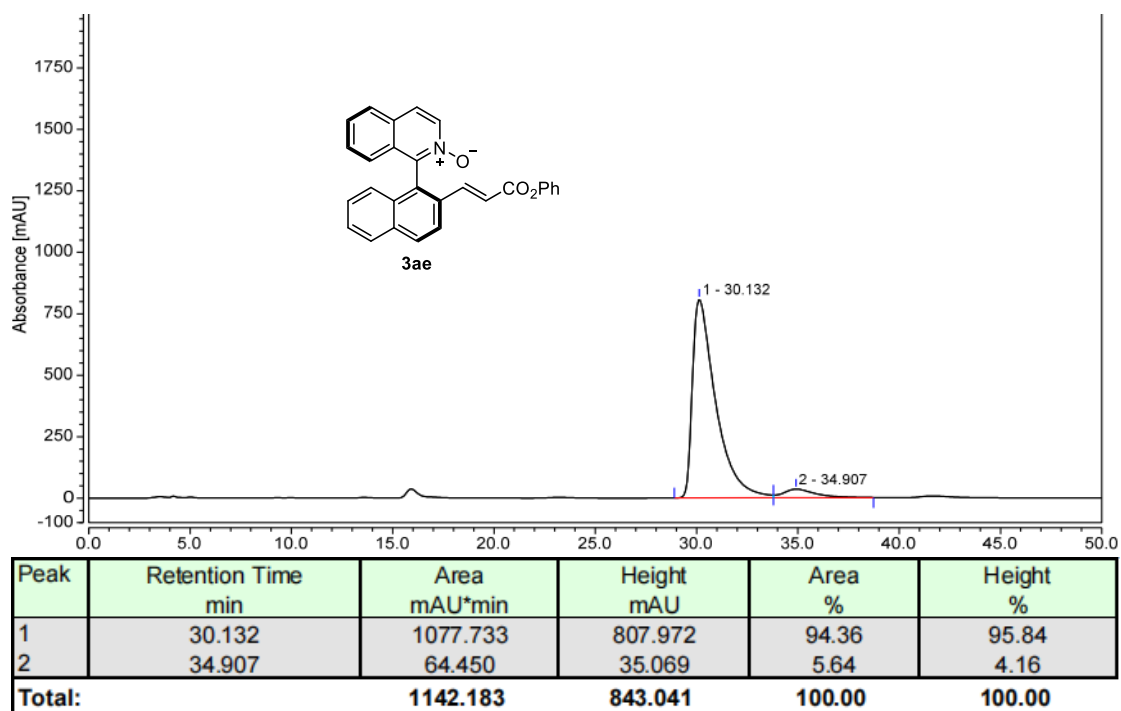

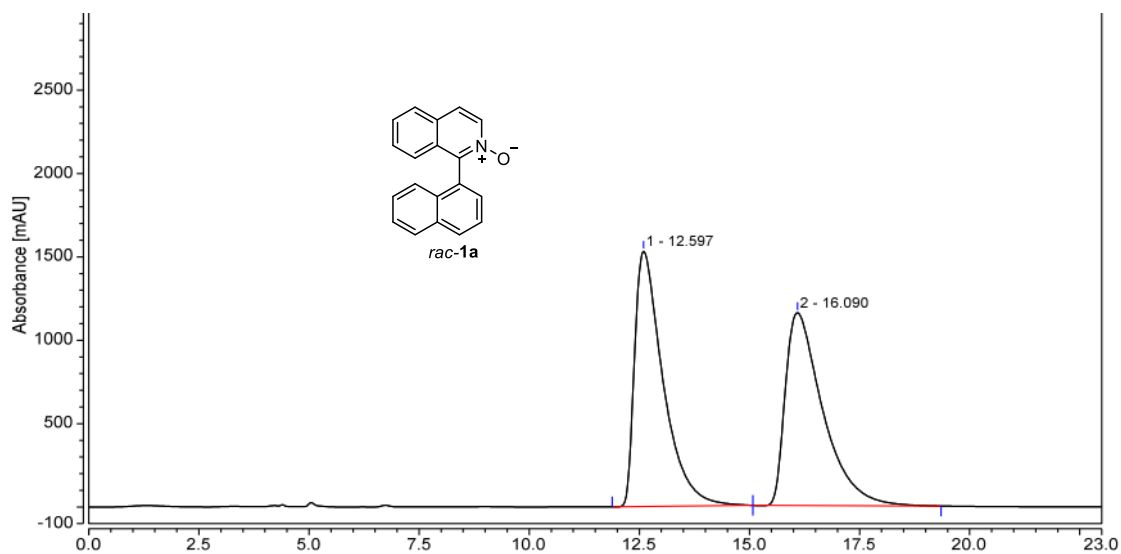

| Peak          | Retention Time min | Area mAU*min    | Height mAU      | Area %        | Height %      |
|---------------|--------------------|-----------------|-----------------|---------------|---------------|
| 1             | 12.597             | 1149.616        | 1531.971        | 50.15         | 56.97         |
| 2             | 16.090             | 1142.765        | 1157.232        | 49.85         | 43.03         |
| <b>Total:</b> |                    | <b>2292.381</b> | <b>2689.203</b> | <b>100.00</b> | <b>100.00</b> |

#### HPLC spectra of recovered (*S*)-1a, for 3af

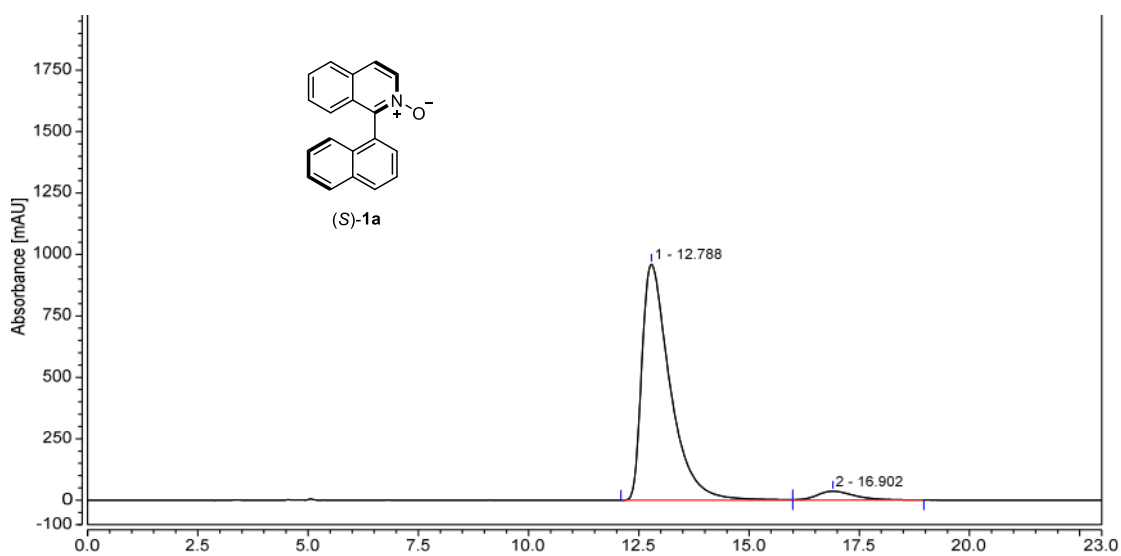

| Peak          | Retention Time min | Area mAU*min   | Height mAU     | Area %        | Height %      |
|---------------|--------------------|----------------|----------------|---------------|---------------|
| 1             | 12.788             | 711.825        | 961.340        | 95.19         | 96.37         |
| 2             | 16.902             | 35.975         | 36.201         | 4.81          | 3.63          |
| <b>Total:</b> |                    | <b>747.800</b> | <b>997.541</b> | <b>100.00</b> | <b>100.00</b> |



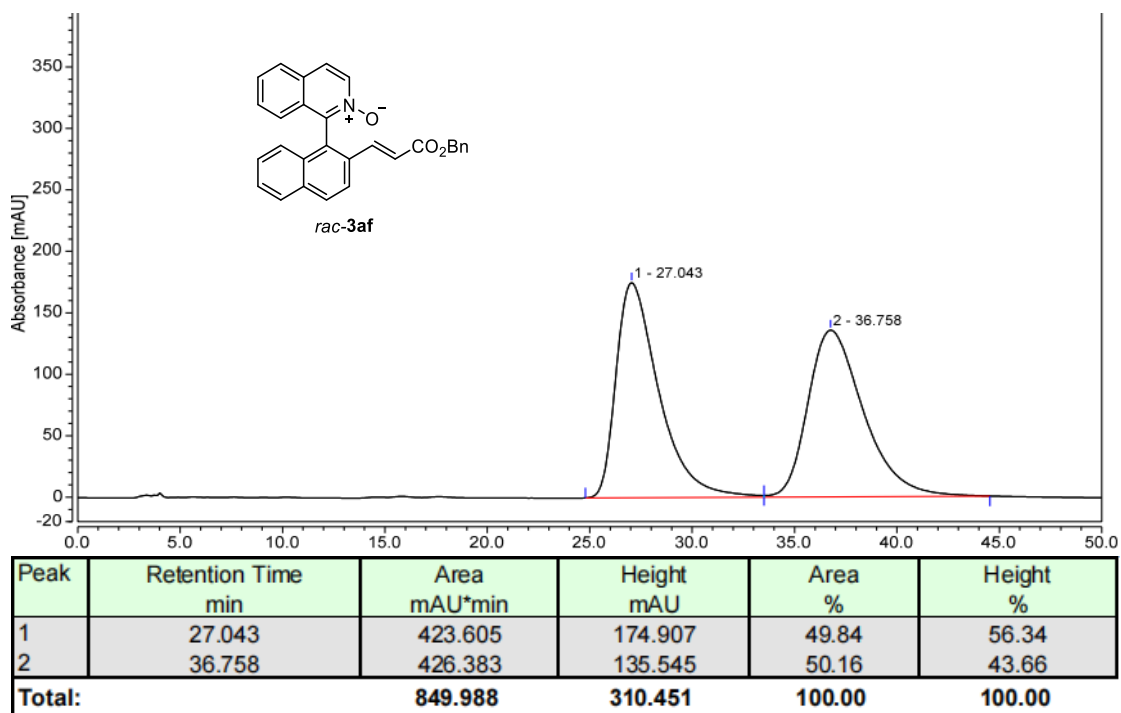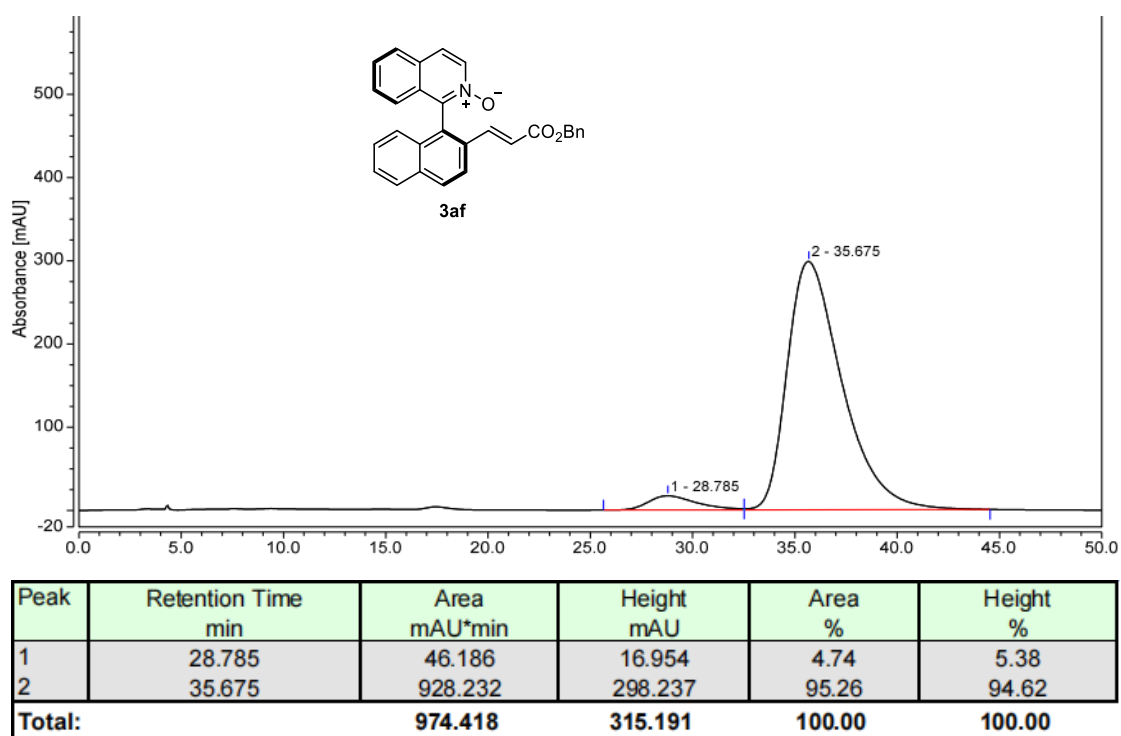

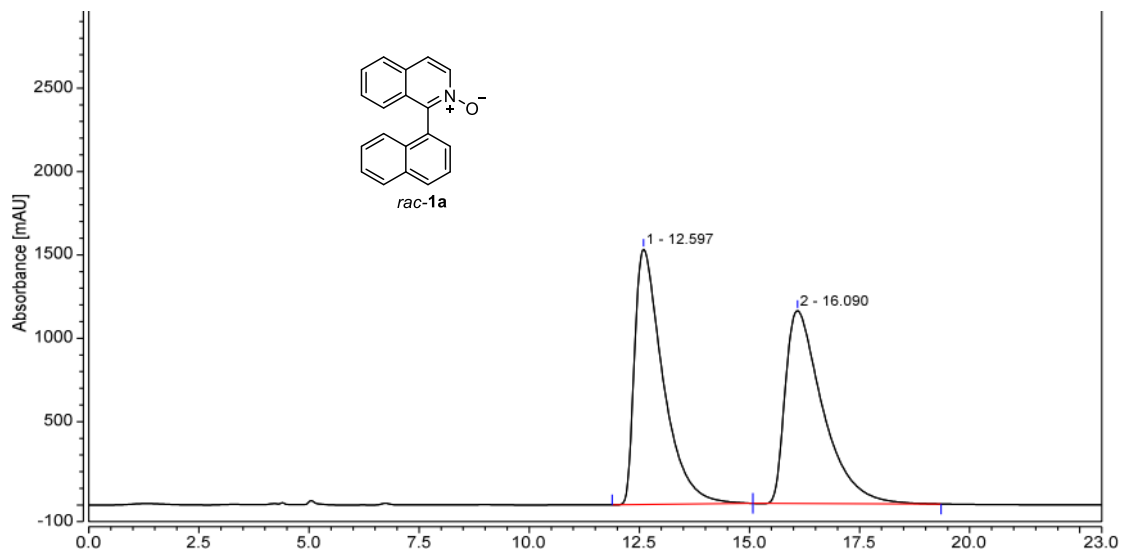

| Peak          | Retention Time min | Area mAU*min    | Height mAU      | Area %        | Height %      |
|---------------|--------------------|-----------------|-----------------|---------------|---------------|
| 1             | 12.597             | 1149.616        | 1531.971        | 50.15         | 56.97         |
| 2             | 16.090             | 1142.765        | 1157.232        | 49.85         | 43.03         |
| <b>Total:</b> |                    | <b>2292.381</b> | <b>2689.203</b> | <b>100.00</b> | <b>100.00</b> |

**HPLC spectra of recovered (*S*)-1a, for 3ag**

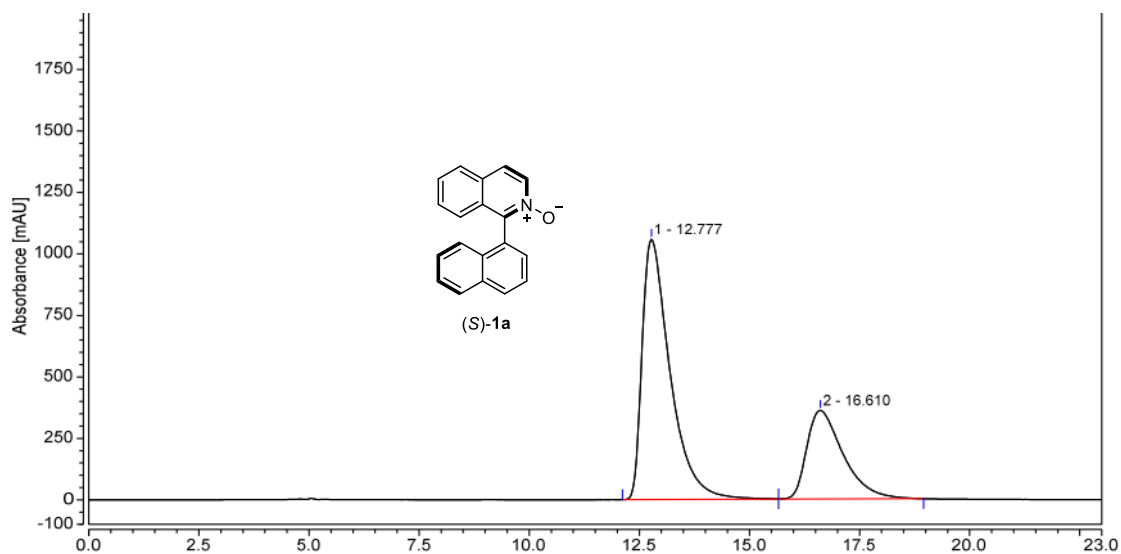

| Peak          | Retention Time min | Area mAU*min    | Height mAU      | Area %        | Height %      |
|---------------|--------------------|-----------------|-----------------|---------------|---------------|
| 1             | 12.777             | 780.656         | 1059.297        | 69.26         | 74.63         |
| 2             | 16.610             | 346.445         | 360.097         | 30.74         | 25.37         |
| <b>Total:</b> |                    | <b>1127.101</b> | <b>1419.393</b> | <b>100.00</b> | <b>100.00</b> |

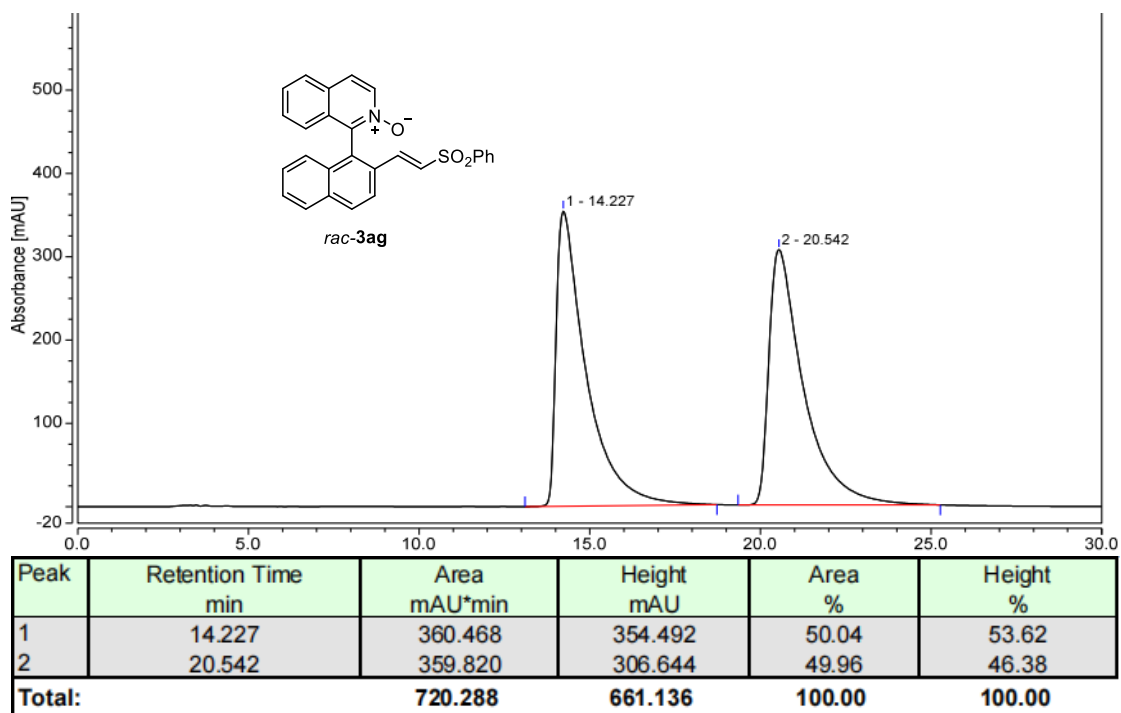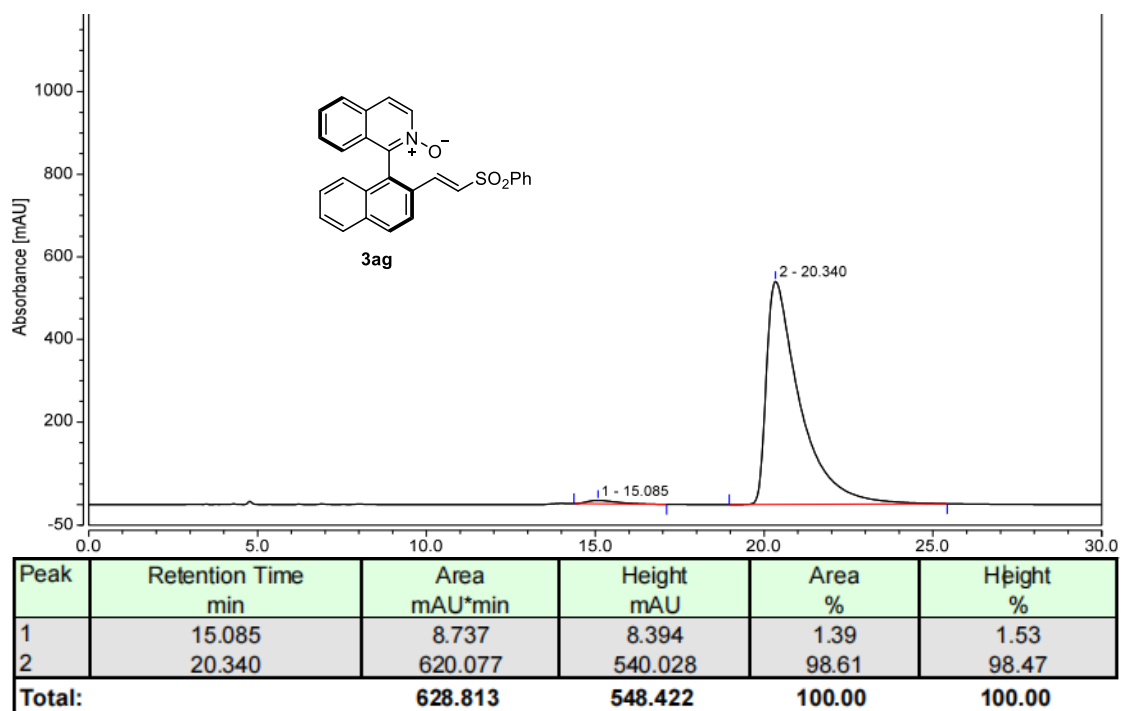

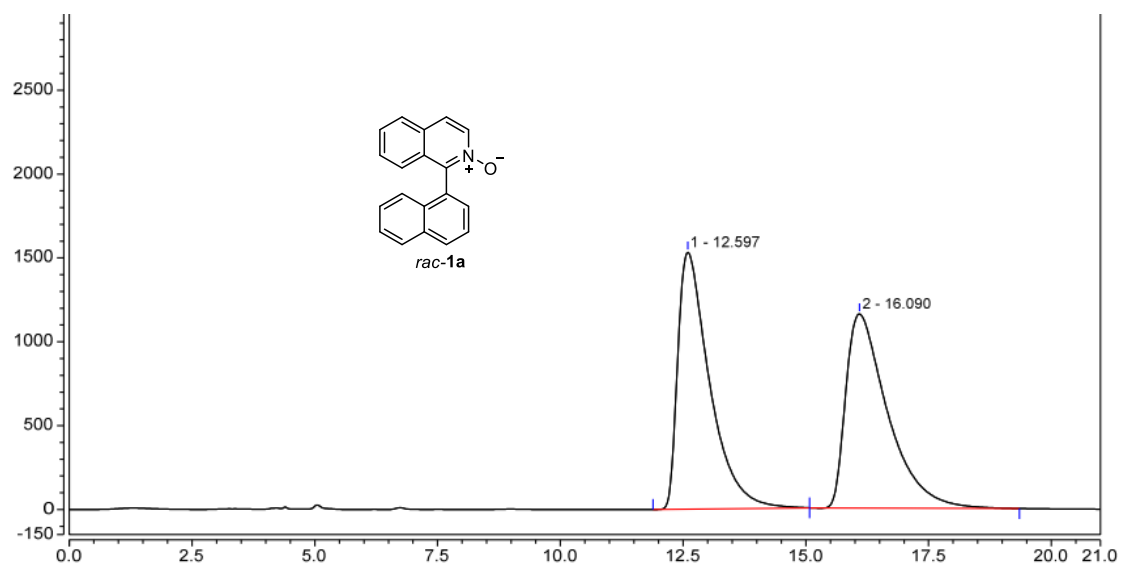

| Peak          | Retention Time min | Area mAU*min    | Height mAU      | Area %        | Height %      |
|---------------|--------------------|-----------------|-----------------|---------------|---------------|
| 1             | 12.597             | 1149.616        | 1531.971        | 50.15         | 56.97         |
| 2             | 16.090             | 1142.765        | 1157.232        | 49.85         | 43.03         |
| <b>Total:</b> |                    | <b>2292.381</b> | <b>2689.203</b> | <b>100.00</b> | <b>100.00</b> |

#### HPLC spectra of recovered (*S*)-1a, for 3ah

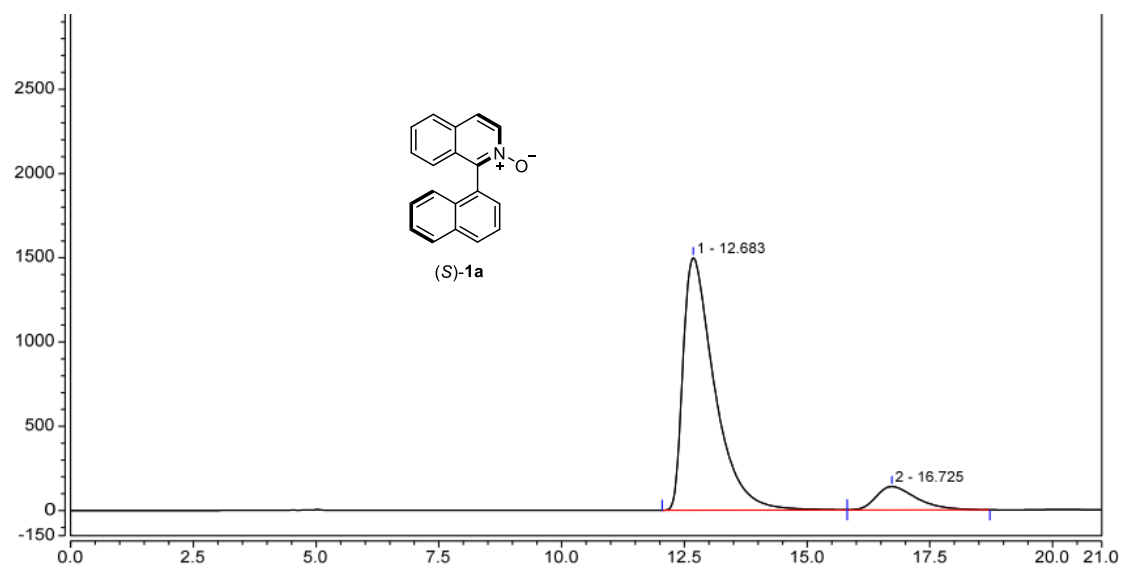

| Peak          | Retention Time min | Area mAU*min    | Height mAU      | Area %        | Height %      |
|---------------|--------------------|-----------------|-----------------|---------------|---------------|
| 1             | 12.683             | 1115.347        | 1498.602        | 89.32         | 91.50         |
| 2             | 16.725             | 133.318         | 139.200         | 10.68         | 8.50          |
| <b>Total:</b> |                    | <b>1248.665</b> | <b>1637.803</b> | <b>100.00</b> | <b>100.00</b> |

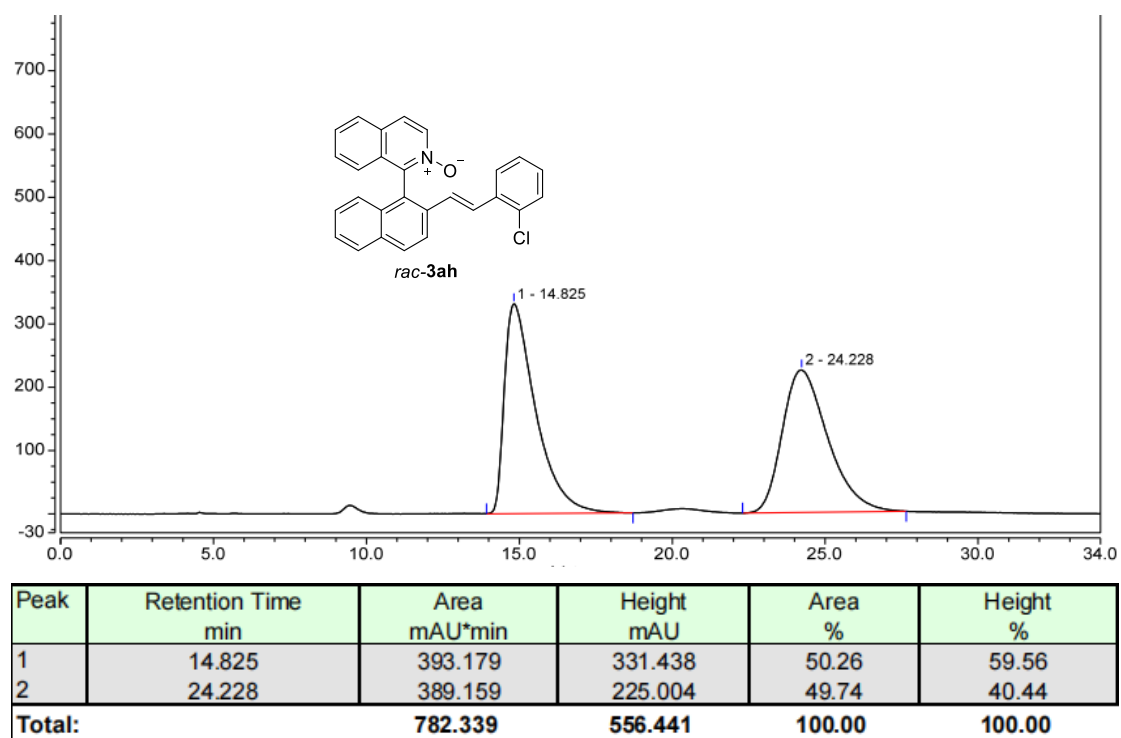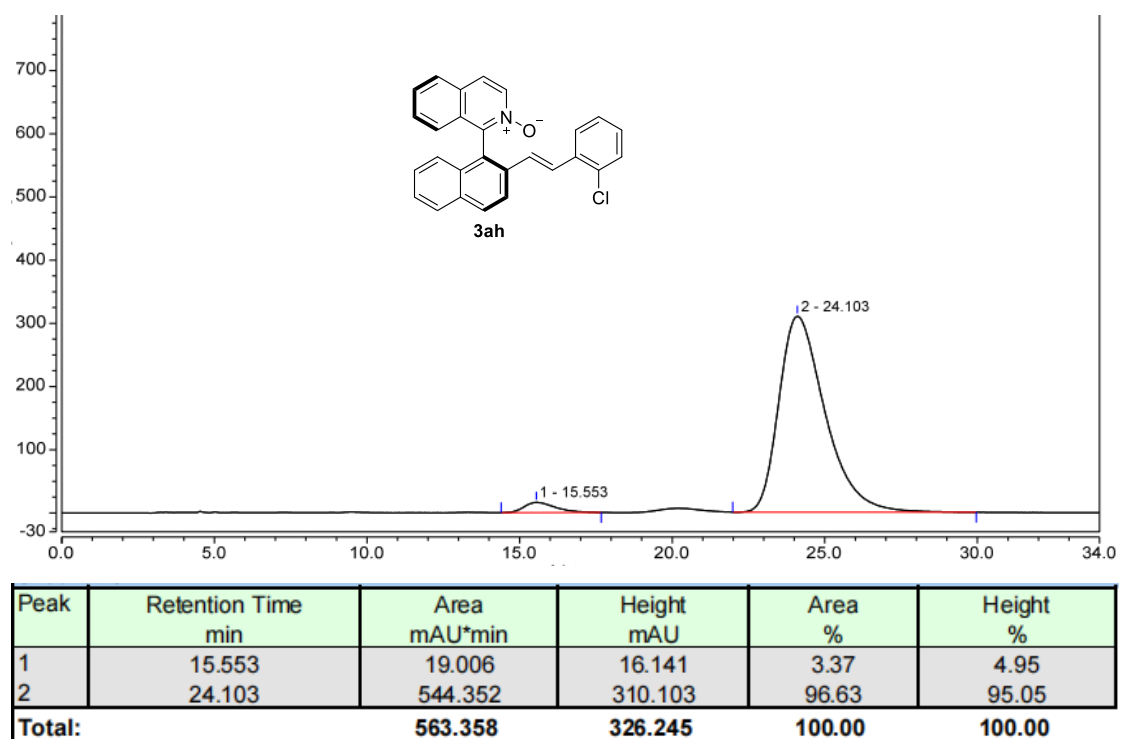

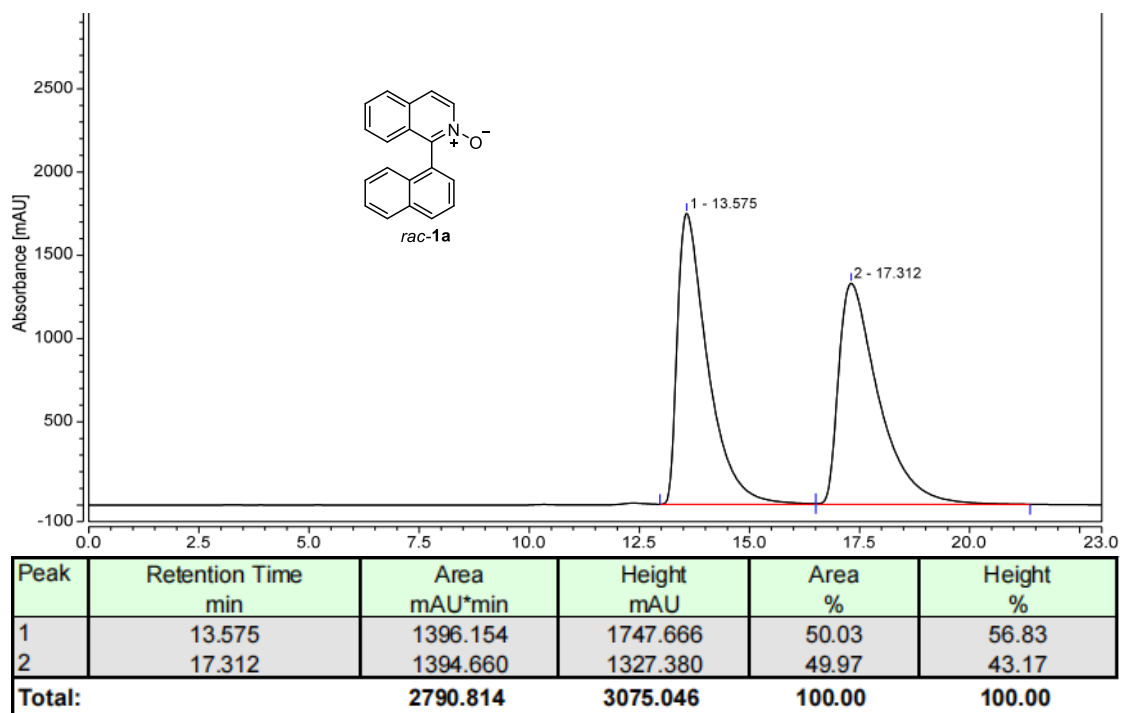

**HPLC spectra of recovered (S)-1a, for 3ai**

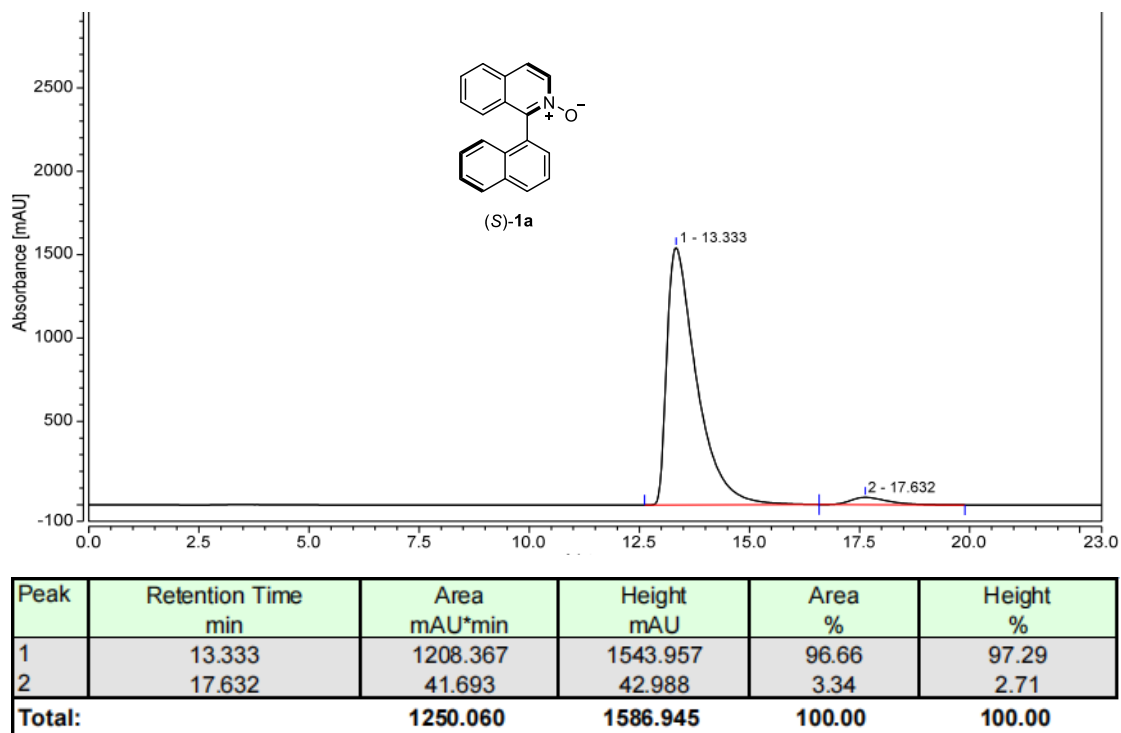

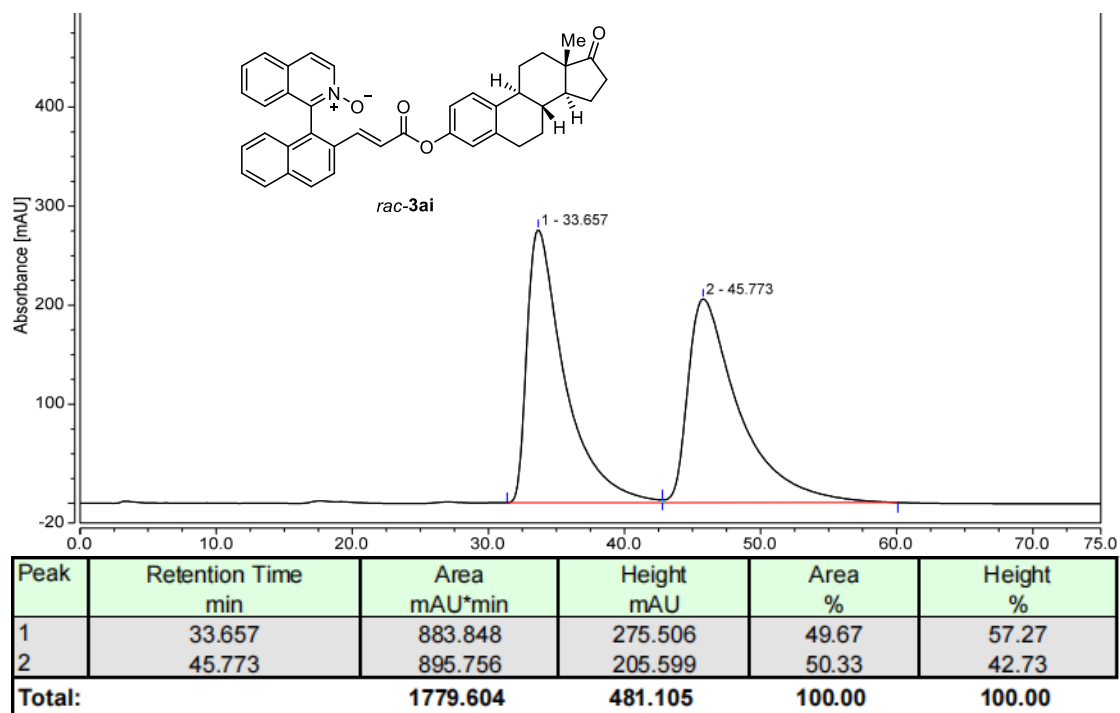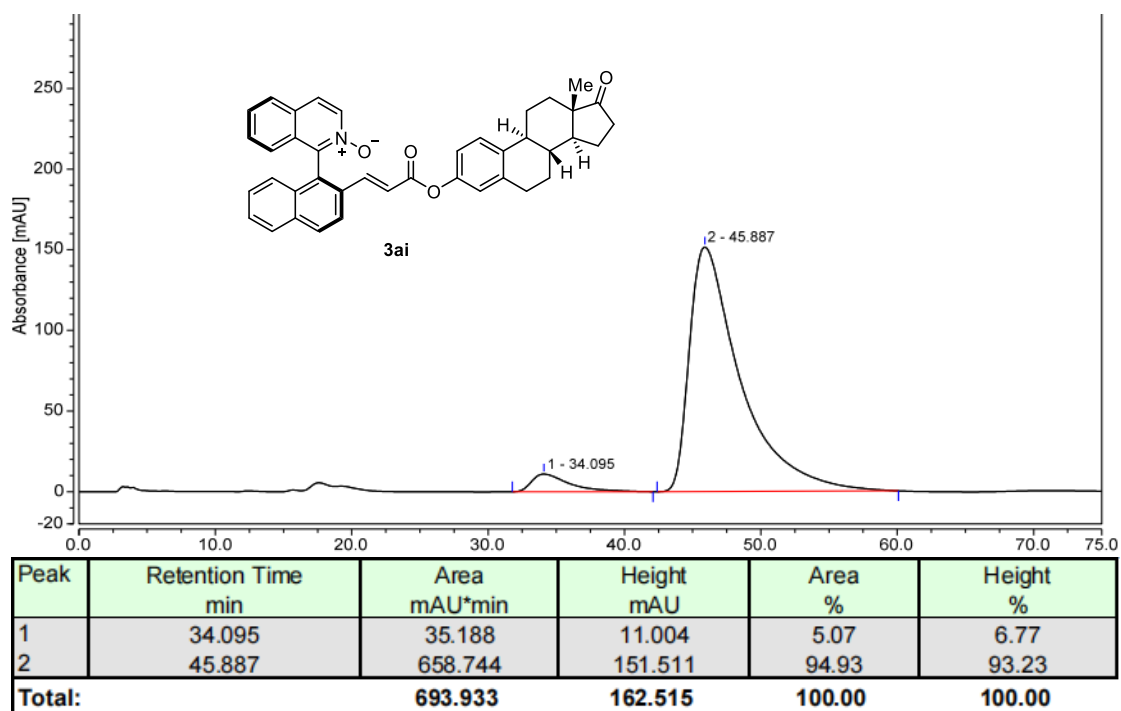

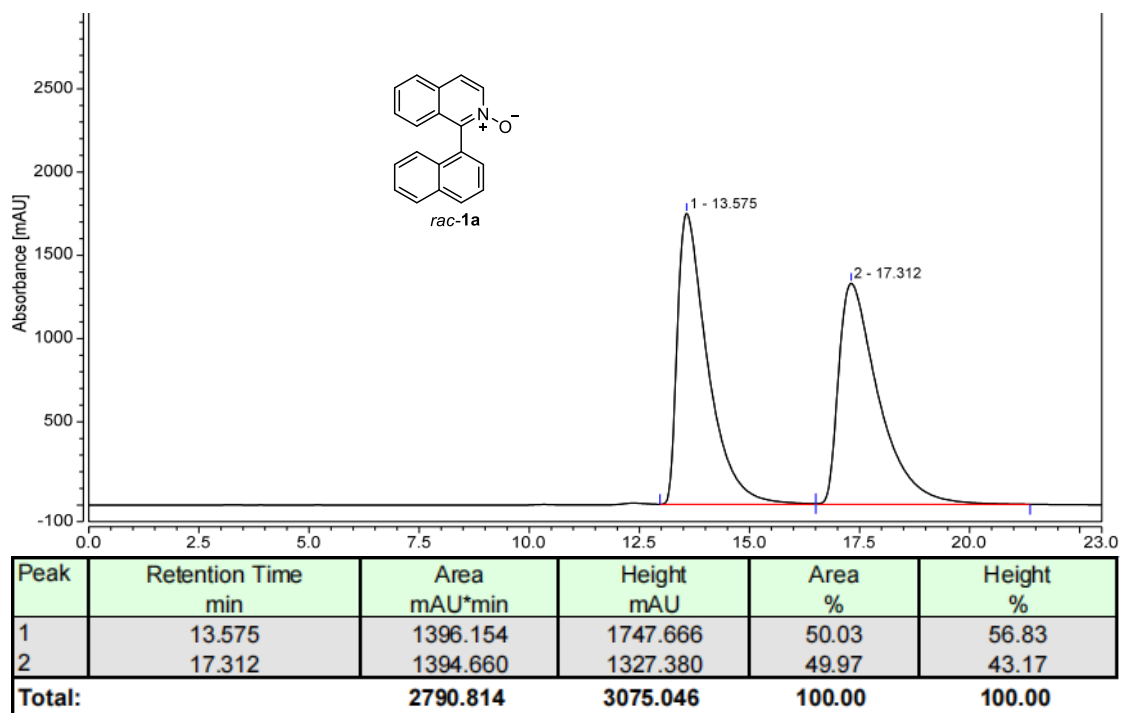

**HPLC spectra of recovered (S)-1a, for 3aj**

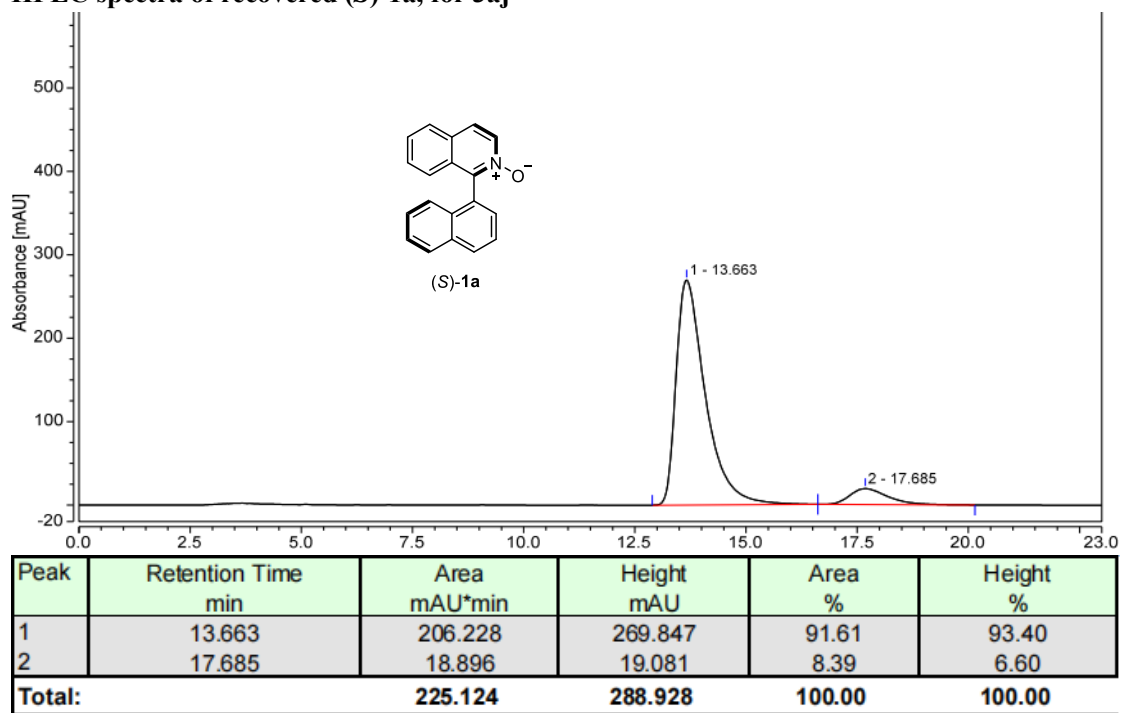



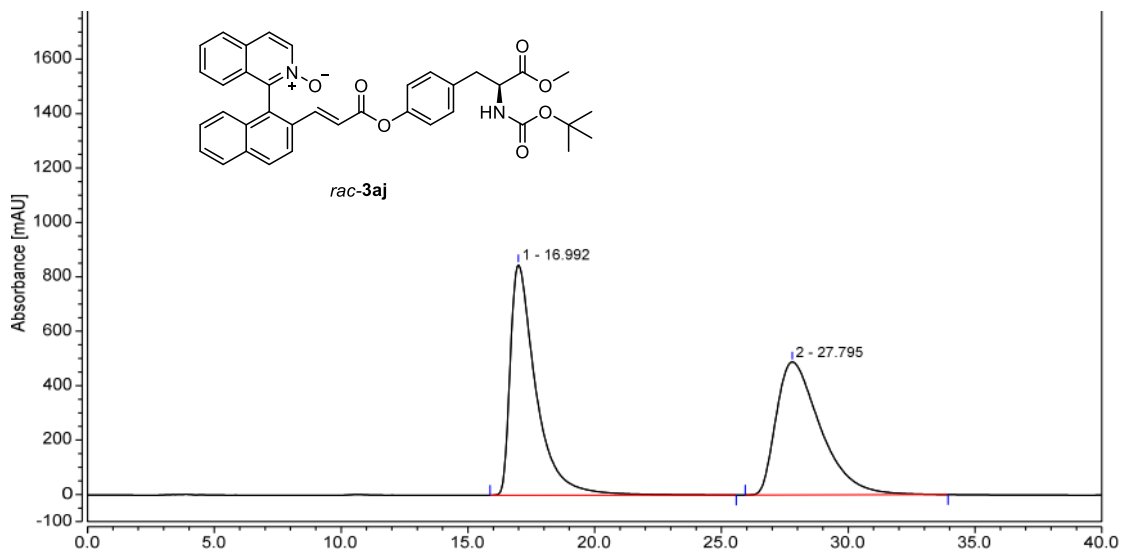

| Peak          | Retention Time min | Area mAU*min    | Height mAU      | Area %        | Height %      |
|---------------|--------------------|-----------------|-----------------|---------------|---------------|
| 1             | 16.992             | 995.492         | 846.977         | 50.15         | 63.41         |
| 2             | 27.795             | 989.464         | 488.771         | 49.85         | 36.59         |
| <b>Total:</b> |                    | <b>1984.956</b> | <b>1335.748</b> | <b>100.00</b> | <b>100.00</b> |

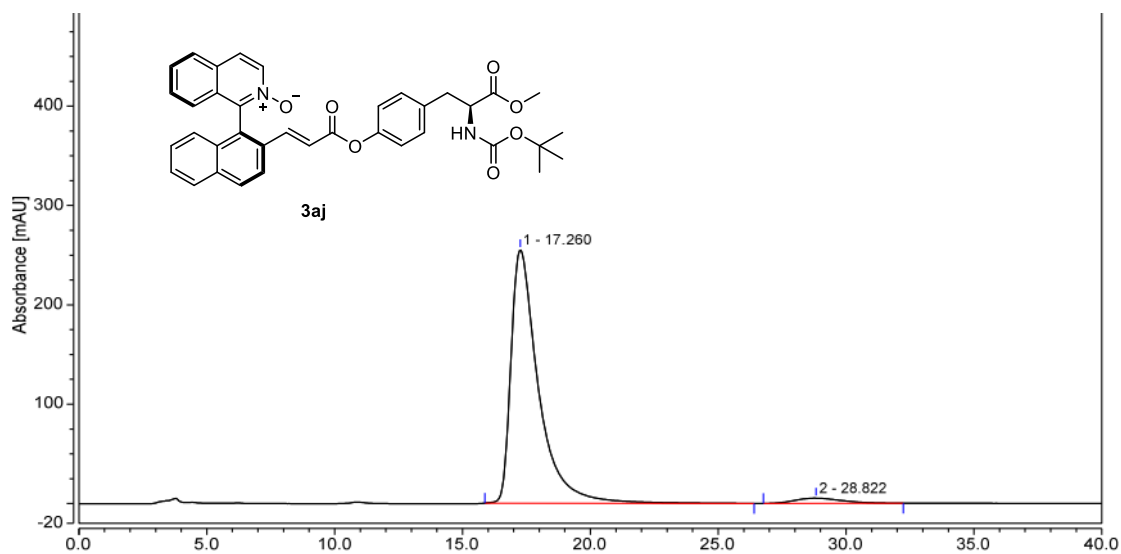

| Peak          | Retention Time min | Area mAU*min   | Height mAU     | Area %        | Height %      |
|---------------|--------------------|----------------|----------------|---------------|---------------|
| 1             | 17.260             | 318.096        | 255.107        | 96.60         | 97.99         |
| 2             | 28.822             | 11.196         | 5.236          | 3.40          | 2.01          |
| <b>Total:</b> |                    | <b>329.291</b> | <b>260.343</b> | <b>100.00</b> | <b>100.00</b> |

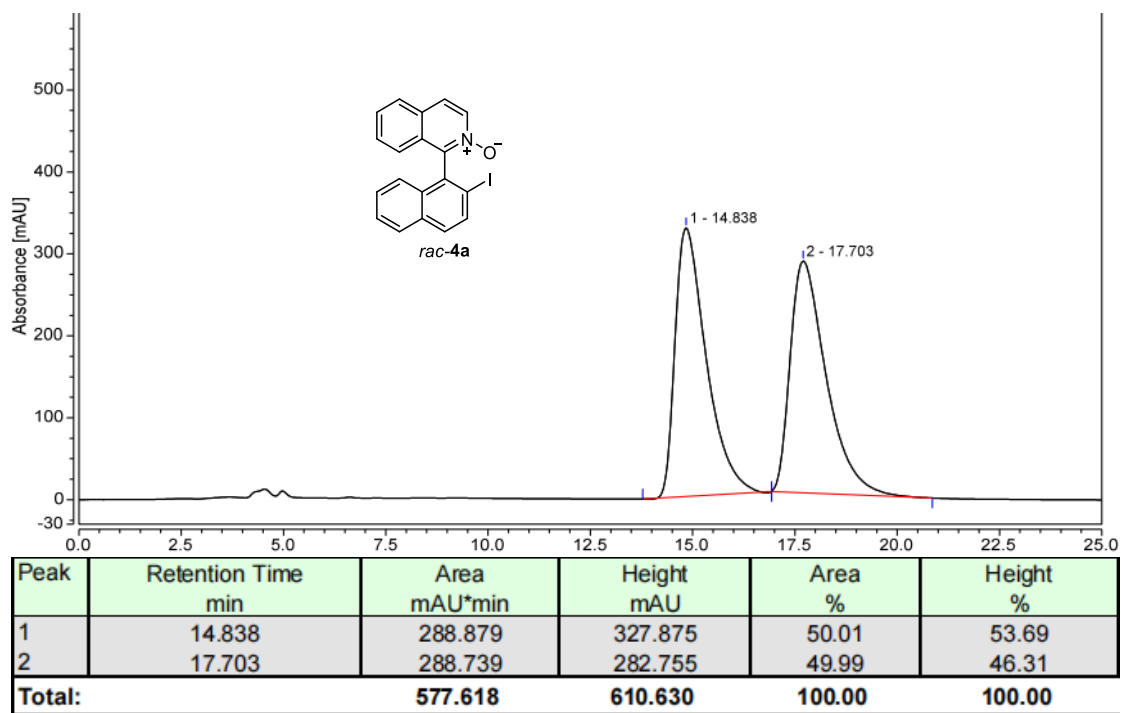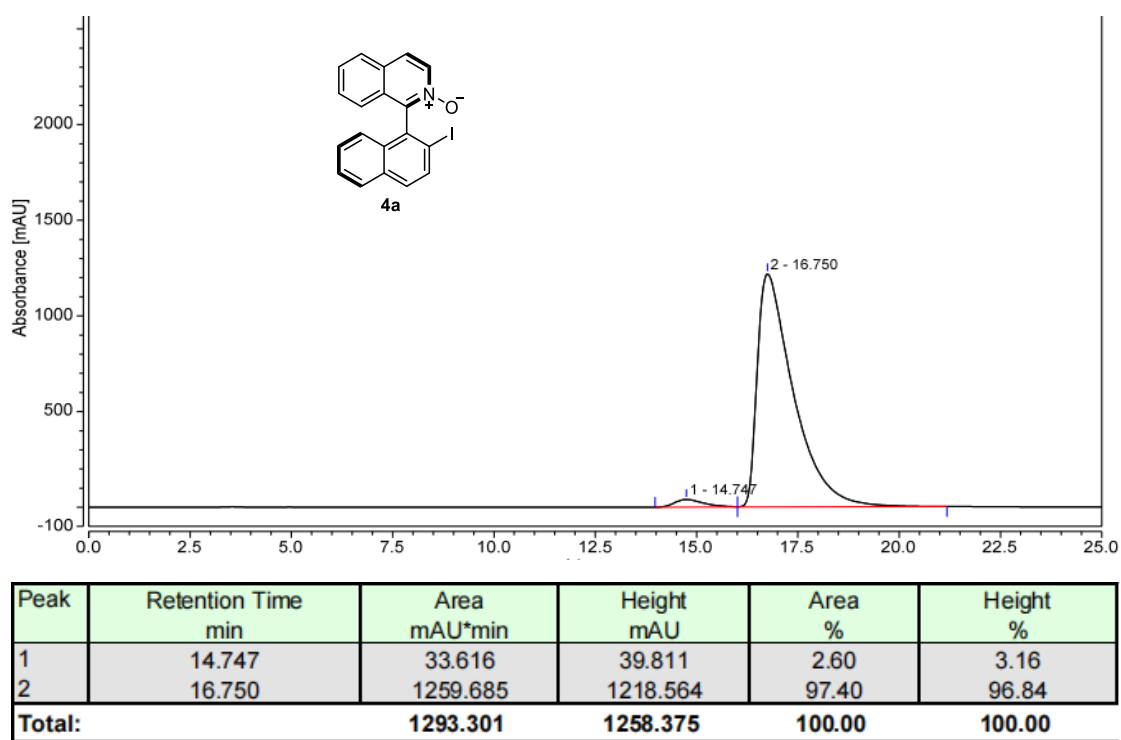

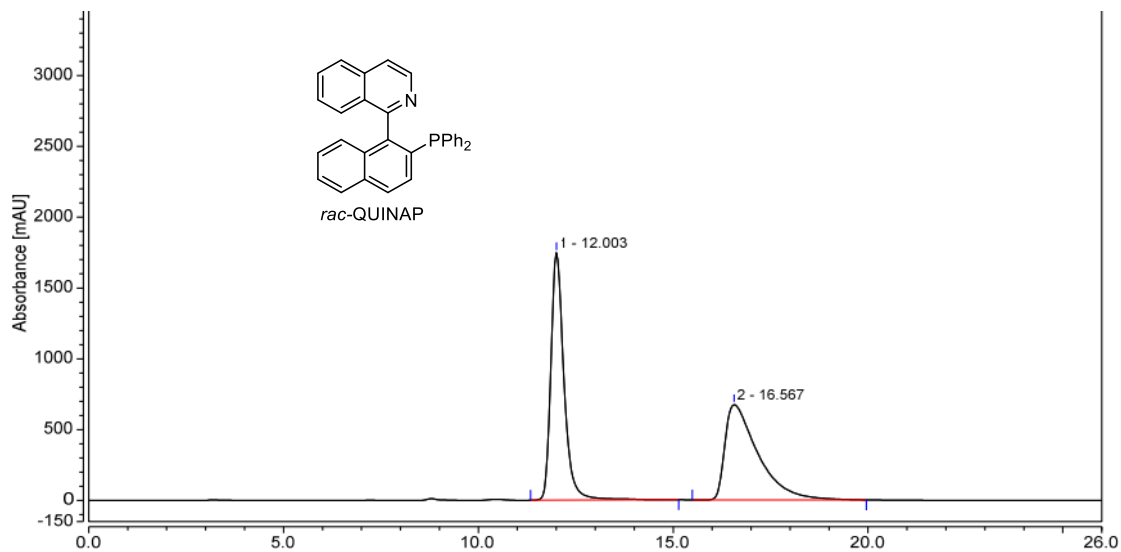

| Peak          | Retention Time min | Area mAU*min    | Height mAU      | Area %        | Height %      |
|---------------|--------------------|-----------------|-----------------|---------------|---------------|
| 1             | 12.003             | 684.526         | 1748.547        | 50.91         | 72.21         |
| 2             | 16.567             | 660.158         | 672.893         | 49.09         | 27.79         |
| <b>Total:</b> |                    | <b>1344.684</b> | <b>2421.440</b> | <b>100.00</b> | <b>100.00</b> |

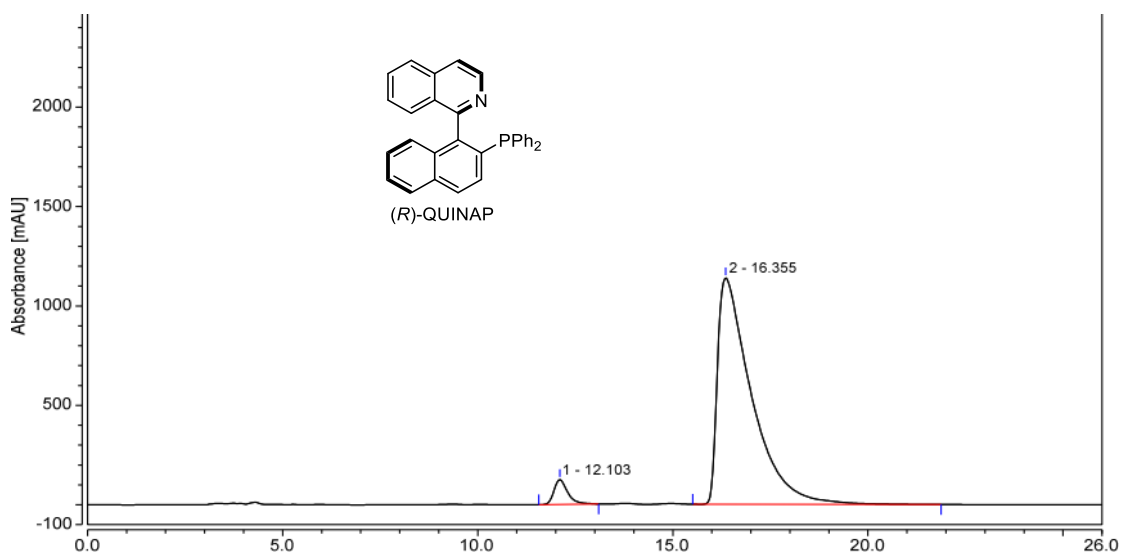

| Peak          | Retention Time min | Area mAU*min    | Height mAU      | Area %        | Height %      |
|---------------|--------------------|-----------------|-----------------|---------------|---------------|
| 1             | 12.103             | 50.934          | 125.107         | 4.23          | 9.90          |
| 2             | 16.355             | 1153.056        | 1139.051        | 95.77         | 90.10         |
| <b>Total:</b> |                    | <b>1203.990</b> | <b>1264.158</b> | <b>100.00</b> | <b>100.00</b> |

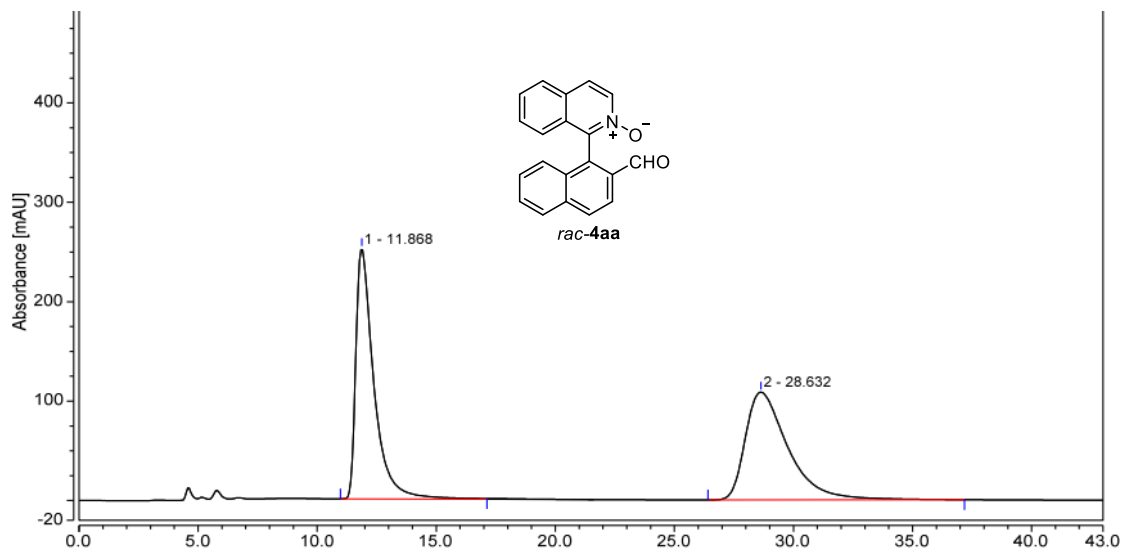

| Peak          | Retention Time min | Area mAU*min   | Height mAU     | Area %        | Height %      |
|---------------|--------------------|----------------|----------------|---------------|---------------|
| 1             | 11.868             | 222.686        | 251.983        | 49.69         | 69.92         |
| 2             | 28.632             | 225.487        | 108.430        | 50.31         | 30.08         |
| <b>Total:</b> |                    | <b>448.173</b> | <b>360.412</b> | <b>100.00</b> | <b>100.00</b> |

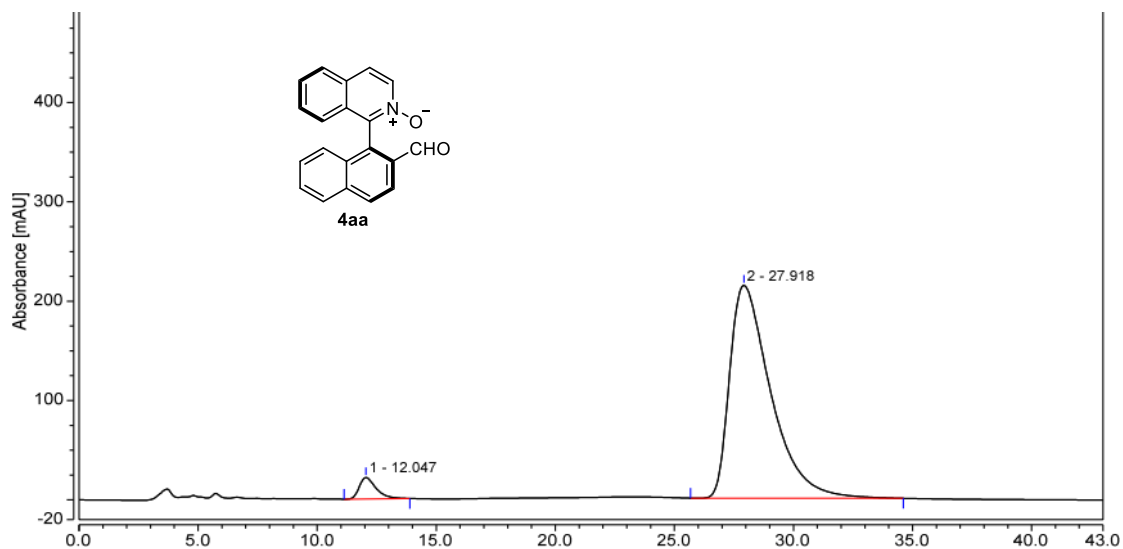

| Peak          | Retention Time min | Area mAU*min   | Height mAU     | Area %        | Height %      |
|---------------|--------------------|----------------|----------------|---------------|---------------|
| 1             | 12.047             | 17.672         | 21.487         | 3.95          | 9.11          |
| 2             | 27.918             | 429.275        | 214.335        | 96.05         | 90.89         |
| <b>Total:</b> |                    | <b>446.947</b> | <b>235.822</b> | <b>100.00</b> | <b>100.00</b> |

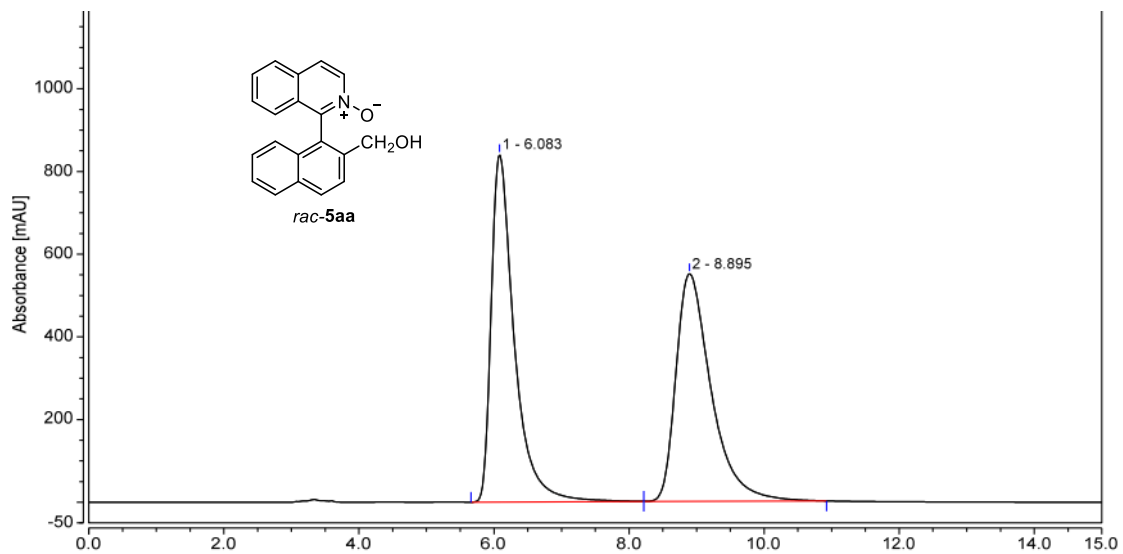

| Peak          | Retention Time min | Area mAU*min   | Height mAU      | Area %        | Height %      |
|---------------|--------------------|----------------|-----------------|---------------|---------------|
| 1             | 6.083              | 333.817        | 840.372         | 50.10         | 60.41         |
| 2             | 8.895              | 332.522        | 550.699         | 49.90         | 39.59         |
| <b>Total:</b> |                    | <b>666.339</b> | <b>1391.072</b> | <b>100.00</b> | <b>100.00</b> |

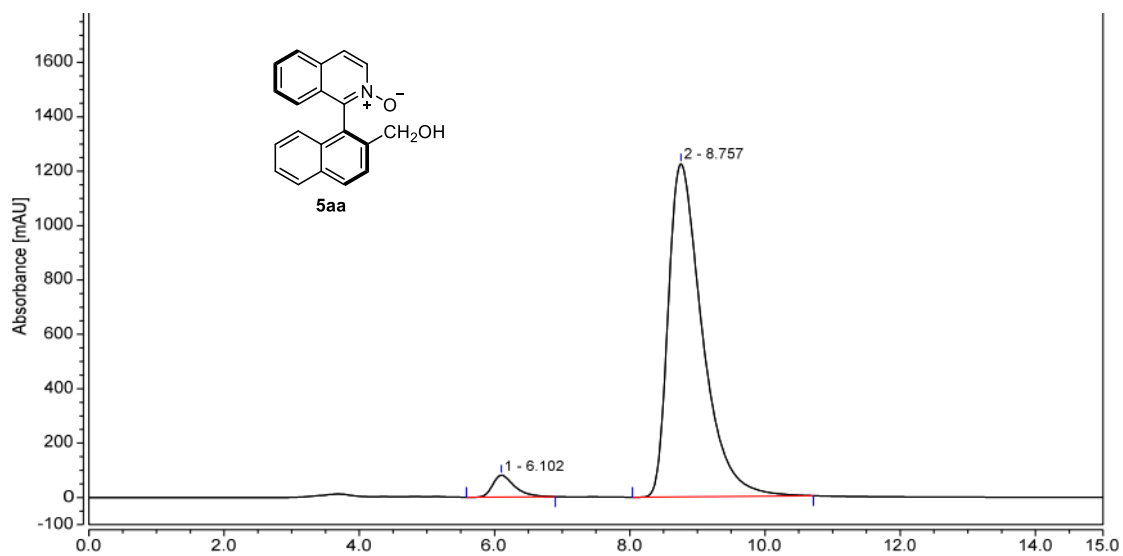

| Peak          | Retention Time min | Area mAU*min   | Height mAU      | Area %        | Height %      |
|---------------|--------------------|----------------|-----------------|---------------|---------------|
| 1             | 6.102              | 30.261         | 80.233          | 4.07          | 6.15          |
| 2             | 8.757              | 712.452        | 1224.768        | 95.93         | 93.85         |
| <b>Total:</b> |                    | <b>742.713</b> | <b>1305.001</b> | <b>100.00</b> | <b>100.00</b> |

## 6. References

1. D.-W. Gao, Q. Gu and S.-L. You, Pd(II)-Catalyzed Intermolecular Direct C-H Bond Iodination: An Efficient Approach toward the Synthesis of Axially Chiral Compounds *via* Kinetic Resolution, *ACS Catal.*, **2014**, *4*, 2741-2745.
2. U. Dhawa, C. Tian, T. Wdowik, J. A. Oliveira, J. Hao and L. Ackermann, Enantioselective Pallada-Electrocatalyzed C-H Activation by Transient Directing Groups: Expedient Access to Helicenes, *Angew. Chem. Int. Ed.*, **2020**, *59*, 13451-13457.
3. K. M. Allan, B. D. Hong and B. M. Stoltz, Expedient Synthesis of 3-Hydroxyisoquinolines and 2-Hydroxy-1,4-naphthoquinones *via* One-pot Aryne Acyl-alkylation/condensation, *Org. Biomol. Chem.*, **2009**, *7*, 4960-4964.
